# Supplementary material for: Activated αIIbβ3 on platelets mediates flow-dependent NETosis via SLC44A2
Source: eLife. 2020 Apr 21;9:e53353. doi: 10.7554/eLife.53353 (PMC7253179; doi:10.7554/eLife.53353)
Supplement: Figure 1—figure supplement 2—source data 1. [file elife-53353-fig1-figsupp2-data1.xlsx]

## Sheet: Supp Fig2
Note the data presented in Supp Fig 2b are derived frorm Supp Fig 2a
Surface coverage	Time	A1* (1)	A1* (2)	A1* (3)	A1* (4)	FL-VWF (1)	FL-VWF(2)	FL-VWF (3)	A1 (1)	A1 (2)	A1 (3)	Eptifibatide (1)	Eptifibatide (2)	Eptifibatide (3)	GR144053 (1)	GR144053 (2)	GR144053 (3)	GR144053 (4)	Plasma-free 1	Plasma-free 2	Plasma-free 3	Time	A1* (1)	A1* (2)	A1* (3)	A1* (4)	FL-VWF (1)	FL-VWF(2)	FL-VWF (3)	A1 (1)	A1 (2)	A1 (3)	Eptifibatide (1)	Eptifibatide (2)	Eptifibatide (3)	GR144053 (1)	GR144053 (2)	GR144053 (3)	GR144053 (4)	Plasma-free 1	Plasma-free 2	Plasma-free 3		Time (s)	A1*	FL-VWF	A1	Eptifibatide	GR144053
	0	--	--	--	--	--	--	--	--	--	--	--	--	--	1	--	--	--	6485	--	5916	0	--	--	--	--	--	--	--	--	--	--	--	--	--	0.000276304	--	--	--	1.79183	--	1.63462		5	0	0	0	0.602619	0
	1	--	--	--	--	--	--	--	--	--	--	--	--	--	--	--	--	--	6599	--	6490	1	--	--	--	--	--	--	--	--	--	--	--	--	--	--	--	--	--	1.82333	--	1.79321		10	1.37862	0	0.560437	2.30778	1.6599
	2	--	--	--	--	1	--	--	--	--	--	--	--	--	--	--	--	219	6692	--	6673	2	--	--	--	--	0.000276304	--	--	--	--	--	--	--	--	--	--	--	0.0605106	1.84903	--	1.84378		15	1.69658	1.33971	1.16536	4.19319	3.34363
	3	--	--	--	--	8	--	--	--	--	--	--	--	--	--	--	--	541	6838	--	7054	3	--	--	--	--	0.00221043	--	--	--	--	--	--	--	--	--	--	--	0.149481	1.88937	--	1.94905		20	3.14393	2.56723	1.52382	6.23747	5.08123
	4	--	--	--	--	13	--	--	--	--	--	--	--	--	--	--	--	786	7087	--	12825	4	--	--	--	--	0.00359195	--	--	--	--	--	--	--	--	--	--	--	0.217175	1.95817	--	3.5436		25	4.20701	4.13204	2.87835	8.54425	6.95078
	5	--	--	--	--	--	--	--	--	--	--	--	--	--	--	--	--	737	7167	--	13322	5	--	--	--	--	--	--	--	--	--	--	--	--	--	--	--	--	0.203636	1.98027	--	3.68092		30	5.64621	6.35859	3.59444	11.4325	8.71995
	6	--	--	--	--	--	--	--	--	--	--	94	--	36	--	--	--	826	7413	--	13106	6	--	--	--	--	--	--	--	--	--	--	0.0259726	--	0.00994695	--	--	--	0.228227	2.04824	--	3.62124		35	7.15648	10.2676	8.24971	13.9279	10.4403
	7	--	--	--	179	100	--	--	--	--	--	172	--	194	--	--	--	1065	7657	--	12708	7	--	--	--	0.0494584	0.0276304	--	--	--	--	--	0.0475243	--	0.053603	--	--	--	0.294264	2.11566	--	3.51127		40	9.22766	13.6905	11.8708	16.7176	11.8327
	8	--	--	--	501	125	--	--	--	--	--	178	--	1813	--	--	--	1360	7623	--	14679	8	--	--	--	0.138428	0.034538	--	--	--	--	--	0.0491821	--	0.500939	--	--	--	0.375774	2.10627	--	4.05587		45	11.0504	17.4736	12.0404	19.682	13.8688
	9	--	--	6	585	182	--	--	--	--	--	61	--	5835	27	4	--	2650	7756	--	15325	9	--	--	0.00165782	0.161638	0.0502874	--	--	--	--	--	0.0168546	--	1.61223	0.00746021	0.00110522	--	0.732206	2.14302	--	4.23436		50	12.8142	20.6236	11.3159	22.3942	15.1264
	10	1	--	94	740	268	--	--	--	--	--	81	41	6421	704	320	--	2960	8107	--	15515	10	0.000276304	--	0.0259726	0.204465	0.0740495	--	--	--	--	--	0.0223806	0.0113285	1.77415	0.194518	0.0884173	--	0.81786	2.24	--	4.28686		55	14.6582	23.8755	12.1751	25.7339	16.6087
	11	4	--	307	847	362	--	--	--	14	--	25	1782	6522	3432	694	--	1044	8353	--	16109	11	0.00110522	--	0.0848254	0.23403	0.100022	--	--	--	0.00386826	--	0.0069076	0.492374	1.80206	0.948276	0.191755	--	0.288462	2.30797	--	4.45098		60	16.3138	27.5054	12.8667	27.9925	18.8548
	12	77435	--	398	974	450	--	294	--	31	--	679	4272	7456	4206	886	286	3431	8472	3521	16601	12	21.3956	--	0.109969	0.26912	0.124337	--	0.0812334	--	0.00856543	--	0.187611	1.18037	2.06012	1.16214	0.244805	0.079023	0.948	2.34085	0.972867	4.58693		65	18.5774	30.0297	13.91	31.128	20.2742
	13	137405	--	450	1133	548	--	--	--	141	--	1711	5223	8326	4716	1132	1026	3550	8719	3788	17177	13	37.9656	--	0.124337	0.313053	0.151415	--	--	--	0.0389589	--	0.472756	1.44314	2.30051	1.30305	0.312776	0.283488	0.98088	2.4091	1.04664	4.74608		70	20.7732	32.6192	15.2161	33.2108	21.2235
	14	150041	--	539	1250	--	--	362	723	404	--	2091	5909	9166	5212	1294	1663	841	8932	4495	17579	14	41.457	--	0.148928	0.34538	--	--	0.100022	0.199768	0.111627	--	0.577752	1.63268	2.5326	1.4401	0.357538	0.459494	0.232372	2.46795	1.24199	4.85715		75	23.4559	35.0676	16.449	37.5491	22.8858
	15	146018	--	664	1314	--	--	20	439	942	--	2458	6798	9926	6004	1493	2061	1173	9048	5187	17989	15	40.3454	--	0.183466	0.363064	--	--	0.00552608	0.121298	0.260279	--	0.679156	1.87832	2.7426	1.65893	0.412522	0.569463	0.324105	2.5	1.43319	4.97044		80	26.3142	38.1047	17.5105	38.6315	25.6051
	16	138505	--	917	1458	1064	--	233	636	1660	--	2816	7646	10997	6679	1753	2239	2773	9175	5884	18678	16	38.2695	--	0.253371	0.402851	0.293988	--	0.0643789	0.175729	0.458665	--	0.778073	2.11262	3.03852	1.84544	0.484361	0.618645	0.766191	2.53509	1.62577	5.16081		85	28.94	38.7512	18.8404	42.2262	26.4589
	17	107613	--	1117	1575	58	--	12	816	2288	--	2958	8257	11524	7395	1988	2639	4512	9325	6258	19571	17	29.7339	--	0.308632	0.435179	0.0160256	--	0.00331565	0.225464	0.632184	--	0.817308	2.28144	3.18413	2.04327	0.549293	0.729167	1.24668	2.57654	1.72911	5.40755		90	31.5066	42.3816	19.7243	44.3962	27.4851
	18	29310	--	1276	1710	3434	--	--	1096	2920	--	3062	9103	11853	7927	3296	2921	5617	9769	6188	20255	18	8.09847	--	0.352564	0.47248	0.948828	--	--	0.302829	0.806808	--	0.846043	2.5152	3.27503	2.19026	0.910698	0.807084	1.552	2.69922	1.70977	5.59654		95	34.2378	44.3628	20.5293	46.1085	29.5277
	19	20786	324	1403	1795	4395	--	713	1414	3363	--	3597	9703	10904	8590	3645	3286	5706	10020	6675	20830	19	5.74326	0.0895225	0.387655	0.495966	1.21436	--	0.197005	0.390694	0.929211	--	0.993866	2.68098	3.01282	2.37345	1.00713	0.907935	1.57659	2.76857	1.84433	5.75542		100	36.5746	46.6193	22.9148	47.1887	31.6487
	20	15491	815	1657	1995	4117	--	659	1811	4159	115	3848	10647	10562	9354	4121	4365	6190	10167	8620	21422	20	4.28023	0.225188	0.457836	0.551227	1.13754	--	0.182084	0.500387	1.14915	0.031775	1.06322	2.94181	2.91832	2.58455	1.13865	1.20607	1.71032	2.80918	2.38174	5.91899		105	38.8631	48.8555	24.0455	46.908	32.831
	21	13238	2231	1706	2173	4190	1167	680	2097	4442	--	4196	11458	12669	9972	4428	5309	6514	10296	9029	21719	21	3.65771	0.616435	0.471375	0.600409	1.15771	0.322447	0.187887	0.57941	1.22734	--	1.15937	3.16589	3.5005	2.75531	1.22347	1.4669	1.79985	2.84483	2.49475	6.00105		110	41.7811	50.0246	25.4779	49.847	34.3608
	22	13107	122	1797	2334	341	1198	834	2394	4461	18	4748	12377	12673	10708	5189	6125	6823	10557	8474	22014	22	3.62152	0.0337091	0.496519	0.644894	0.0942197	0.331012	0.230438	0.661472	1.23259	0.00497347	1.31189	3.41982	3.5016	2.95866	1.43374	1.69236	1.88522	2.91694	2.3414	6.08256		115	43.6149	50.9383	26.8895	52.0817	36.277
	23	13634	2290	1942	2526	4734	1543	868	2880	4522	91	5307	13196	11047	11310	5916	6575	7507	10683	9933	23043	23	3.76713	0.632737	0.536583	0.697944	1.30802	0.426337	0.239832	0.795756	1.24945	0.0251437	1.46635	3.64611	3.05233	3.125	1.63462	1.8167	2.07422	2.95176	2.74453	6.36688		120	46.5735	53.5815	27.6621	53.3541	37.5258
	24	13655	3448	2126	2119	5868	1926	1021	3407	4754	161	5787	13891	11252	12213	6361	7384	7894	11044	11786	23400	24	3.77293	0.952697	0.587423	0.585489	1.62135	0.532162	0.282107	0.941368	1.31355	0.044485	1.59897	3.83814	3.10897	3.3745	1.75757	2.04023	2.18115	3.0515	3.25652	6.46552		125	48.6602	57.8077	29.0419	54.9538	39.0671
	25	13078	3665	2265	483	6313	2290	1124	4059	5068	682	6317	14897	13984	12923	6536	8051	8600	11281	11092	24320	25	3.61351	1.01265	0.625829	0.133455	1.74431	0.632737	0.310566	1.12152	1.40031	0.188439	1.74541	4.1161	3.86384	3.57068	1.80592	2.22452	2.37622	3.11699	3.06477	6.71972		130	51.0546	57.276	30.6444	57.5364	41.3087
	26	13252	3906	2452	2085	6747	2411	1315	4209	5018	1182	6875	15794	14498	13478	6973	8906	8662	11452	11579	24288	26	3.66158	1.07924	0.677498	0.576094	1.86422	0.666169	0.36334	1.16296	1.38649	0.326592	1.89959	4.36395	4.00586	3.72403	1.92667	2.46076	2.39335	3.16424	3.19933	6.71088		135	52.7726	59.1853	31.7596	59.3273	43.8116
	27	12660	4149	2565	3646	6886	2784	1469	4468	5237	1938	7385	16636	15036	14243	7581	9777	9043	11682	12446	24974	27	3.49801	1.14639	0.70872	1.0074	1.90263	0.769231	0.405891	1.23453	1.447	0.535477	2.04051	4.5966	4.15451	3.9354	2.09466	2.70143	2.49862	3.22779	3.43888	6.90042		140	53.6515	61.5073	33.2146	59.967	44.4778
	28	13384	4474	2868	4285	7215	3079	488	4769	5411	2370	8013	17621	15336	14930	7867	10625	9797	11938	12718	25727	28	3.69805	1.23618	0.79244	1.18396	1.99353	0.85074	0.134836	1.31769	1.49508	0.654841	2.21403	4.86876	4.2374	4.12522	2.17368	2.93573	2.70695	3.29852	3.51404	7.10848		145	56.5337	62.798	35.9749	62.5554	44.9814
	29	13786	4678	2972	3898	7850	3448	940	5542	5550	2646	8841	18475	15888	15577	8461	11463	9898	12107	13200	26507	29	3.80913	1.29255	0.821176	1.07703	2.16899	0.952697	0.259726	1.53128	1.53349	0.731101	2.44281	5.10472	4.38992	4.30399	2.33781	3.16727	2.73486	3.34521	3.64721	7.32399
	30	13878	5097	3193	2393	10118	3922	506	5711	5868	1074	9403	19488	16637	16415	8739	12377	10874	12490	14268	26332	30	3.83455	1.40832	0.882239	0.661196	2.79565	1.08366	0.13981	1.57797	1.62135	0.296751	2.59809	5.38462	4.59687	4.53553	2.41462	3.41982	3.00453	3.45104	3.94231	7.27564
	31	14873	5517	3280	2807	10041	4421	736	6419	5982	619	10096	20347	16717	17276	9382	13519	11403	12590	11304	27111	31	4.10947	1.52437	0.906278	0.775586	2.77437	1.22154	0.20336	1.7736	1.65285	0.171032	2.78957	5.62196	4.61898	4.77343	2.59229	3.73536	3.1507	3.47867	3.12334	7.49088
	32	15030	5783	3631	4617	3129	4819	2388	6560	6215	518	10903	22209	17156	18072	9745	14503	11154	12885	9186	28006	32	4.15285	1.59787	1.00326	1.2757	0.864556	1.33151	0.659814	1.81256	1.71723	0.143126	3.01254	6.13644	4.74027	4.99337	2.69258	4.00724	3.0819	3.56018	2.53813	7.73817
	33	16239	6160	3786	1366	9113	5063	3015	6648	6428	736	11255	22374	17526	19252	10268	15226	11874	13065	17063	28431	33	4.4869	1.70203	1.04609	0.377431	2.51796	1.39893	0.833057	1.83687	1.77608	0.20336	3.1098	6.18203	4.84251	5.31941	2.83709	4.20701	3.28084	3.60991	4.71458	7.8556
	34	16755	6519	4098	6890	10200	5463	3348	7314	6588	912	12366	23442	18150	19610	10848	15542	12334	13325	18801	29278	34	4.62948	1.80123	1.13229	1.90374	2.8183	1.50945	0.925066	2.02089	1.82029	0.251989	3.41678	6.47712	5.01492	5.41832	2.99735	4.29432	3.40794	3.68175	5.19479	8.08963
	35	17435	6451	4440	7553	11228	5895	3815	8493	6838	1026	12818	24237	18579	20608	11176	17378	12691	13529	19422	30015	35	4.81736	1.78244	1.22679	2.08693	3.10234	1.62881	1.0541	2.34665	1.88937	0.283488	3.54167	6.69678	5.13345	5.69408	3.08798	4.80161	3.50658	3.73812	5.36638	8.29327
	36	17427	6188	4611	8317	12737	6192	4151	8173	6849	791	13897	25138	18984	21806	11560	18173	13007	13833	20742	30272	36	4.81515	1.70977	1.27404	2.29802	3.51929	1.71088	1.14694	2.25823	1.89241	0.218557	3.8398	6.94573	5.24536	6.02509	3.19408	5.02128	3.59389	3.82212	5.7311	8.36428
	37	18410	6538	4816	8977	12611	6362	4664	8793	6904	293	13964	25954	19245	22423	11454	18220	14028	14020	21314	31041	37	5.08676	1.80648	1.33068	2.48038	3.48447	1.75785	1.28868	2.42954	1.9076	0.0809571	3.85831	7.1712	5.31747	6.19557	3.16479	5.03426	3.87599	3.87378	5.88915	8.57676
	38	19065	7133	4884	9524	13427	7373	5201	9644	7105	223	15434	26286	19656	23735	11878	18842	14764	14185	21939	31526	38	5.26774	1.97088	1.34947	2.63152	3.70994	2.03719	1.43706	2.66468	1.96314	0.0616158	4.26448	7.26293	5.43103	6.55808	3.28194	5.20612	4.07935	3.91937	6.06184	8.71076
	39	20337	7735	5187	10233	13916	8034	5623	10208	7593	367	17331	27425	20249	23631	12330	19605	14656	14449	23002	33014	39	5.6192	2.13721	1.43319	2.82742	3.84505	2.21983	1.55366	2.82051	2.09798	0.101404	4.78863	7.57764	5.59488	6.52934	3.40683	5.41694	4.04951	3.99232	6.35555	9.12191
	40	21368	7866	5367	10913	14652	8519	4703	7996	8091	458	18407	28473	20844	25185	12645	20511	15219	14732	24256	32590	40	5.90407	2.17341	1.48292	3.01531	4.04841	2.35384	1.29946	2.20933	2.23558	0.126547	5.08593	7.86721	5.75928	6.95872	3.49387	5.66727	4.20507	4.07051	6.70203	9.00475
	41	21079	8272	5668	11547	15669	8078	4454	11682	8776	538	19380	29629	21300	25515	13013	20645	16260	15040	24535	33388	41	5.82422	2.28559	1.56609	3.19048	4.32941	2.23198	1.23066	3.22779	2.42485	0.148652	5.35477	8.18662	5.88528	7.0499	3.59555	5.7043	4.49271	4.15561	6.77912	9.22524
	42	22532	8670	5691	12200	16019	8168	8221	10561	9647	994	19551	30199	22261	26539	13869	21451	17321	15173	25460	33790	42	6.22569	2.39556	1.57245	3.37091	4.42612	2.25685	2.2715	2.91805	2.66551	0.274646	5.40202	8.34411	6.15081	7.33284	3.83206	5.927	4.78586	4.19236	7.0347	9.33632
	43	23293	8956	5780	12831	16234	--	8550	11007	10934	1633	21668	30691	22652	27592	14230	21661	17007	15390	25702	34657	43	6.43595	2.47458	1.59704	3.54526	4.48552	#VALUE!	2.3624	3.04128	3.02111	0.451205	5.98696	8.48005	6.25884	7.62378	3.93181	5.98502	4.6991	4.25232	7.10157	9.57587
	44	24048	9337	6008	13306	17441	12110	8941	11589	11850	1775	22495	31735	23542	28627	14533	23031	17362	15728	26362	35155	44	6.64456	2.57985	1.66004	3.6765	4.81902	3.34604	2.47044	3.20209	3.2742	0.49044	6.21546	8.76851	6.50475	7.90976	4.01553	6.36356	4.79719	4.34571	7.28393	9.71347
	45	24392	9934	6229	13713	18144	12692	6099	12791	13018	1892	23926	32401	23985	30036	15755	23079	18030	15872	27243	35930	45	6.73961	2.74481	1.7211	3.78896	5.01326	3.50685	1.68518	3.53421	3.59693	0.522767	6.61085	8.95253	6.62716	8.29907	4.35317	6.37682	4.98176	4.3855	7.52735	9.92761
	46	24839	10418	6353	14477	18296	13678	10665	13013	13323	2082	25708	33215	24338	30325	15648	24100	18349	15940	27732	36372	46	6.86312	2.87854	1.75536	4.00006	5.05526	3.77929	2.94678	3.59555	3.6812	0.575265	7.10323	9.17744	6.72469	8.37892	4.32361	6.65893	5.0699	4.40429	7.66247	10.0497
	47	25320	10955	6363	14738	19016	14430	12109	13405	13530	2234	26529	33068	24706	32283	16251	24623	19297	16440	29846	36405	47	6.99602	3.02691	1.75812	4.07217	5.2542	3.98707	3.34577	3.70386	3.7384	0.617263	7.33007	9.13683	6.82637	8.91993	4.49022	6.80344	5.33184	4.54244	8.24657	10.0589
	48	24968	11628	6626	15097	20168	15231	5653	58260	13708	2317	26817	33669	25365	33667	16690	24900	19999	16592	29881	38265	48	6.89876	3.21286	1.83079	4.17136	5.5725	4.20839	1.56195	16.0975	3.78758	0.640197	7.40965	9.30288	7.00845	9.30233	4.61152	6.87997	5.52581	4.58444	8.25624	10.5728
	49	25201	12324	6913	15323	20570	15692	10831	38303	13972	2515	28701	35008	26631	35333	17349	26133	19828	16717	29642	38030	49	6.96314	3.40517	1.91009	4.23381	5.68358	4.33576	2.99265	10.5833	3.86052	0.694905	7.93021	9.67286	7.35826	9.76265	4.7936	7.22066	5.47856	4.61898	8.19021	10.5078
	50	25390	12866	6855	15793	21297	16522	7045	14608	13968	2676	29540	36568	26662	35857	17292	26021	21455	16983	31036	38505	50	7.01536	3.55493	1.89406	4.36367	5.88445	4.5651	1.94656	4.03625	3.85942	0.73939	8.16202	10.1039	7.36682	9.90744	4.77785	7.18971	5.92811	4.69247	8.57538	10.6391
	51	27052	13847	7239	15958	21745	18021	7185	14895	13789	2841	31696	38429	27390	37177	18279	27426	22357	17273	31674	41051	51	7.47458	3.82598	2.00017	4.40926	6.00823	4.97928	1.98525	4.11555	3.80996	0.78498	8.75774	10.6181	7.56797	10.2722	5.05056	7.57792	6.17733	4.7726	8.75166	11.3426
	52	27268	14135	7440	16568	22068	18833	5806	15982	13842	2997	32480	39597	28267	37956	18948	27163	15907	17561	31826	39458	52	7.53426	3.90556	2.0557	4.57781	6.09748	5.20364	1.60422	4.41589	3.8246	0.828084	8.97436	10.9408	7.81029	10.4874	5.23541	7.50525	4.39517	4.85218	8.79366	10.9024
	53	27849	14666	7635	16895	22803	20191	8500	17064	13431	3099	33739	40341	29264	37830	19146	27930	14416	17773	33741	40508	53	7.69479	4.05228	2.10958	4.66816	6.30056	5.57886	2.34859	4.71485	3.71104	0.856267	9.32223	11.1464	8.08576	10.4526	5.29012	7.71718	3.9832	4.91075	9.32278	11.1925
	54	29014	14794	7892	17137	23463	21283	16147	17647	13689	3152	34590	41330	30079	39156	19514	28120	22520	18205	35167	41800	54	8.01669	4.08764	2.18059	4.73502	6.48292	5.88058	4.46148	4.87594	3.78233	0.870911	9.55736	11.4197	8.31095	10.819	5.3918	7.76967	6.22237	5.03012	9.71679	11.5495
	55	29455	16032	8023	17926	24214	22257	17150	18536	13718	3490	35926	41939	31198	40414	19796	29112	23265	18221	35123	41388	55	8.13854	4.42971	2.21679	4.95303	6.69043	6.1497	4.73862	5.12157	3.79034	0.964302	9.9265	11.5879	8.62014	11.1666	5.46972	8.04377	6.42822	5.03454	9.70463	11.4357
	56	30370	16682	8171	18309	24854	23675	17950	18925	13753	3782	36752	42545	31959	40828	20047	29944	24069	18534	36818	41936	56	8.39136	4.60931	2.25768	5.05885	6.86726	6.5415	4.95966	5.22906	3.80001	1.04498	10.1547	11.7554	8.8304	11.2809	5.53907	8.27365	6.65036	5.12102	10.173	11.5871
	57	30581	17943	8565	18736	25698	24875	19121	18887	14085	3702	38145	43463	32996	41465	21055	29681	24559	18860	36966	42204	57	8.44966	4.95773	2.36655	5.17683	7.10046	6.87307	5.28321	5.21856	3.89174	1.02288	10.5396	12.009	9.11693	11.457	5.81758	8.20098	6.78575	5.2111	10.2139	11.6611
	58	30433	5361	8763	19263	26176	26165	20153	19852	14288	4047	40252	44312	33944	42783	21435	31709	25007	18881	38133	43242	58	8.40876	1.48127	2.42125	5.32245	7.23254	7.2295	5.56836	5.48519	3.94783	1.1182	11.1218	12.2436	9.37887	11.8211	5.92258	8.76133	6.90954	5.2169	10.5363	11.9479
	59	31565	15142	9231	19659	27446	27421	18900	20441	14231	4188	41194	46636	34494	44110	21829	30787	25371	19121	40196	43998	59	8.72154	4.1838	2.55056	5.43186	7.58344	7.57654	5.22215	5.64793	3.93208	1.15716	11.3821	12.8857	9.53084	12.1878	6.03144	8.50658	7.01011	5.28321	11.1063	12.1568
	60	32160	19749	9409	20421	27527	28377	13135	20442	14343	4242	41905	47104	35121	44894	22584	32132	26627	19599	40128	43298	60	8.88594	5.45673	2.59975	5.64241	7.60582	7.84068	3.62926	5.64821	3.96303	1.17208	11.5785	13.015	9.70408	12.4044	6.24005	8.87821	7.35715	5.41529	11.0875	11.9634
	61	33674	20375	9578	20669	28362	30675	23222	19831	15688	4361	43147	48809	35882	45631	22928	32394	26861	20096	40980	44478	61	9.30427	5.6297	2.64644	5.71093	7.83654	8.47563	6.41634	5.47939	4.33466	1.20496	11.9217	13.4861	9.91435	12.608	6.3351	8.9506	7.42181	5.55261	11.3229	12.2895
	62	33364	21692	9925	21262	29511	31697	24735	19886	20309	4402	44964	49278	36102	47825	23130	31478	27658	20091	42354	45107	62	9.21861	5.99359	2.74232	5.87478	8.15401	8.75801	6.83438	5.49458	5.61146	1.21629	12.4237	13.6157	9.97513	13.2142	6.39092	8.6975	7.64202	5.55123	11.7026	12.4633
	63	33240	22132	10364	21625	30031	33778	25254	19837	27967	4458	45992	50355	37240	47800	23949	32077	28065	20216	43428	45003	63	9.18435	6.11516	2.86362	5.97508	8.29769	9.333	6.97779	5.48105	7.7274	1.23176	12.7078	13.9133	10.2896	13.2073	6.61721	8.86301	7.75448	5.58576	11.9993	12.4345
	64	34177	23069	10652	22655	30559	35050	25772	19963	44964	4500	48053	51119	37765	49294	24552	32544	28181	20588	43821	45453	64	9.44325	6.37406	2.94319	6.25967	8.44358	9.68446	7.12091	5.51586	12.4237	1.24337	13.2772	14.1244	10.4346	13.6201	6.78382	8.99204	7.78653	5.68855	12.1079	12.5589
	65	37170	23875	10821	23151	31639	37295	26994	19027	47698	4537	48397	52284	38242	50077	24729	33109	28272	21204	45155	46147	65	10.2702	6.59676	2.98989	6.39672	8.74199	10.3048	7.45855	5.25724	13.1792	1.25359	13.3723	14.4463	10.5664	13.8365	6.83273	9.14815	7.81167	5.85875	12.4765	12.7506
	66	37482	24184	11088	23550	32989	36653	28118	19128	47511	4529	43102	53620	39377	51361	25510	33243	29392	20996	45455	46515	66	10.3564	6.68214	3.06366	6.50696	9.115	10.1274	7.76912	5.28515	13.1275	1.25138	11.9093	14.8154	10.88	14.1913	7.04852	9.18518	8.12113	5.80128	12.5594	12.8523
	67	39286	24717	11372	24037	33085	38878	29292	19293	47213	4800	49398	52384	40250	50576	25437	32753	30237	21200	47416	47322	67	10.8549	6.82941	3.14213	6.64152	9.14152	10.7422	8.0935	5.33074	13.0451	1.32626	13.6489	14.4739	11.1212	13.9744	7.02835	9.04979	8.35461	5.85765	13.1012	13.0753
	68	39567	24771	7863	24300	34300	39986	30504	19767	52730	4887	50595	54686	40902	51980	26755	34908	30524	21550	47619	47697	68	10.9325	6.84433	2.17258	6.71419	9.47723	11.0483	8.42838	5.4617	14.5695	1.3503	13.9796	15.11	11.3014	14.3623	7.39252	9.64523	8.43391	5.95435	13.1573	13.1789
	69	41032	26229	8930	25079	35115	41741	32233	20725	65722	5352	52580	54722	42032	52001	26663	34865	30725	21675	48201	48174	69	11.3373	7.24718	2.4674	6.92943	9.70242	11.5332	8.90611	5.7264	18.1593	1.47878	14.5281	15.1199	11.6136	14.3681	7.3671	9.63334	8.48945	5.98889	13.3181	13.3107
	70	42456	26603	9804	24740	35769	42827	32886	20709	63570	5293	53211	55380	42633	54484	26884	35863	33911	22062	49764	48347	70	11.7308	7.35052	2.70889	6.83576	9.88312	11.8333	9.08654	5.72198	17.5647	1.46248	14.7024	15.3017	11.7797	15.0542	7.42816	9.9091	9.36975	6.09582	13.75	13.3585
	71	42553	27407	4392	26732	36641	45782	33690	21134	76904	5451	56030	56545	43869	52985	27476	35499	32205	22289	49739	48781	71	11.7576	7.57267	1.21353	7.38616	10.1241	12.6498	9.30869	5.83941	21.2489	1.50613	15.4813	15.6236	12.1212	14.64	7.59173	9.80852	8.89838	6.15854	13.7431	13.4784
	72	46078	27862	11677	27568	37916	46447	34634	21286	102483	5702	57295	56778	44378	55401	27800	36236	32627	22407	50342	49766	72	12.7315	7.69839	3.2264	7.61715	10.4763	12.8335	9.56952	5.88141	28.3165	1.57549	15.8308	15.688	12.2618	15.3075	7.68126	10.0122	9.01498	6.19115	13.9097	13.7506
	73	45531	28874	14147	27789	38676	47984	34956	21624	161135	5774	57691	58119	45140	56697	28328	35943	32861	22607	51515	49915	73	12.5804	7.97801	3.90887	7.67822	10.6863	13.2582	9.65849	5.9748	44.5223	1.59538	15.9403	16.0585	12.4724	15.6656	7.82714	9.9312	9.07963	6.24641	14.2338	13.7917
	74	45835	29299	14551	28735	39549	48972	36451	21880	175131	6084	59381	58727	45879	56800	28550	37280	32056	22707	53266	50551	74	12.6644	8.09544	4.0205	7.9396	10.9276	13.5312	10.0716	6.04553	48.3894	1.68103	16.4072	16.2265	12.6766	15.6941	7.88848	10.3006	8.85721	6.27404	14.7176	13.9675
	75	45832	30196	15406	29685	40429	49493	37397	20712	174402	6317	61002	60046	46917	58627	29121	36785	34494	22844	54022	50415	75	12.6636	8.34328	4.25674	8.20209	11.1707	13.6751	10.3329	5.72281	48.188	1.74541	16.8551	16.591	12.9634	16.1989	8.04625	10.1638	9.53084	6.31189	14.9265	13.9299
	76	44759	30927	15628	30180	41550	52691	39154	21262	156995	6499	62168	59664	46995	59958	29182	39252	33591	23335	55933	50661	76	12.3671	8.54526	4.31808	8.33886	11.4804	14.5587	10.8184	5.87478	43.3784	1.7957	17.1773	16.4854	12.9849	16.5666	8.06311	10.8455	9.28133	6.44756	15.4545	13.9978
	77	46199	32226	16219	30582	42715	53586	40668	21038	133544	6833	63562	60676	48701	61505	30213	38884	34481	23376	55285	51812	77	12.765	8.90418	4.48138	8.44993	11.8023	14.806	11.2367	5.81289	36.8988	1.88799	17.5624	16.765	13.4563	16.9941	8.34798	10.7438	9.52724	6.45889	15.2755	14.3159
	78	45713	33040	17212	31462	44116	54770	41750	21463	125321	6927	65090	61936	48770	61551	29605	38854	36507	23703	57769	52237	78	12.6307	9.12909	4.75575	8.69308	12.1894	15.1332	11.5357	5.93032	34.6267	1.91396	17.9846	17.1132	13.4754	17.0068	8.17998	10.7355	10.087	6.54924	15.9618	14.4333
	79	46243	34243	17478	32119	45691	56273	42919	22042	113712	7149	66491	62799	50246	62402	30624	39886	35162	24178	57590	52868	79	12.7771	9.46148	4.82924	8.87461	12.6246	15.5485	11.8587	6.0903	31.4191	1.9753	18.3717	17.3516	13.8832	17.2419	8.46154	11.0207	9.71541	6.68048	15.9124	14.6076
	80	48474	34576	17946	32591	46227	58203	44216	24480	97633	6775	67455	63770	50288	63602	32012	40626	35059	24226	59245	52756	80	13.3936	9.55349	4.95855	9.00503	12.7727	16.0817	12.2171	6.76393	26.9764	1.87196	18.6381	17.6199	13.8948	17.5735	8.84505	11.2251	9.68695	6.69374	16.3696	14.5767
	81	48783	35414	18410	33235	46839	59717	45610	25384	75458	4971	70289	64732	50926	63460	31356	40858	36053	24571	60690	52911	81	13.4789	9.78504	5.08676	9.18297	12.9418	16.5001	12.6022	7.0137	20.8494	1.37351	19.4211	17.8857	14.0711	17.5343	8.66379	11.2892	9.96159	6.78907	16.7689	14.6195
	82	48840	35618	17979	33835	48107	61828	48691	27131	68772	3751	71160	65223	52352	65246	32022	41078	37614	24907	60188	52915	82	13.4947	9.8414	4.96767	9.34875	13.2922	17.0833	13.4535	7.49641	19.002	1.03642	19.6618	18.0214	14.4651	18.0277	8.84781	11.35	10.3929	6.88191	16.6302	14.6206
	83	48908	36917	18440	34450	50229	64127	50022	27971	63790	3170	72696	65325	53109	66279	32397	42022	38646	24868	62875	52919	83	13.5135	10.2003	5.09505	9.51868	13.8785	17.7186	13.8213	7.7285	17.6254	0.875884	20.0862	18.0496	14.6742	18.3132	8.95143	11.6109	10.6781	6.87113	17.3726	14.6217
	84	50163	37514	19290	34818	50228	65924	50242	29450	63174	3179	74359	66541	54457	66350	32840	42629	38471	25347	61980	53636	84	13.8602	10.3653	5.32991	9.62036	13.8782	18.2151	13.8821	8.13716	17.4552	0.878371	20.5457	18.3856	15.0467	18.3328	9.07383	11.7786	10.6297	7.00348	17.1253	14.8198
	85	50491	38333	19669	35944	51165	69589	51499	32762	62605	3169	74747	66417	54912	69110	33307	43110	39583	25891	63092	55090	85	13.9509	10.5916	5.43463	9.93148	14.1371	19.2277	14.2294	9.05228	17.298	0.875608	20.6529	18.3513	15.1724	19.0954	9.20286	11.9115	10.9369	7.15379	17.4326	15.2216
	86	51719	38976	20254	36230	53425	68843	53138	33711	70702	3417	76177	68285	55734	68993	33961	44302	41440	25687	64433	54454	86	14.2902	10.7692	5.59626	10.0105	14.7615	19.0216	14.6823	9.31449	19.5353	0.944131	21.048	18.8674	15.3995	19.0631	9.38357	12.2408	11.45	7.09742	17.8031	15.0459
	87	51568	40181	20844	36976	54545	70872	54551	36343	76601	4404	78664	69060	56141	71718	34456	44485	40528	25927	64992	54559	87	14.2485	11.1022	5.75928	10.2166	15.071	19.5822	15.0727	10.0417	21.1652	1.21684	21.7352	19.0816	15.512	19.816	9.52034	12.2914	11.1981	7.16374	17.9576	15.0749
	88	51029	41929	21237	37411	55239	71096	55166	38623	79268	5358	80130	69944	57714	71714	34996	44529	42801	26691	64879	55467	88	14.0995	11.5852	5.86787	10.3368	15.2628	19.6441	15.2426	10.6717	21.9021	1.48044	22.1403	19.3258	15.9466	19.8149	9.66954	12.3035	11.8261	7.37483	17.9263	15.3258
	89	51658	42594	22076	38144	56587	72568	55483	41350	78951	5430	82264	68928	58238	74159	35736	46024	41688	26504	66520	55355	89	14.2733	11.7689	6.09969	10.5393	15.6352	20.0508	15.3302	11.4252	21.8145	1.50033	22.7299	19.0451	16.0914	20.4904	9.87401	12.7166	11.5186	7.32317	18.3798	15.2948
	90	54208	44169	22458	39139	57573	74558	57590	43049	82228	5453	82829	71258	59612	73579	35828	47676	43693	27097	68968	56066	90	14.9779	12.2041	6.20524	10.8143	15.9077	20.6007	15.9124	11.8946	22.7199	1.50669	22.886	19.6889	16.471	20.3302	9.89943	13.1731	12.0726	7.48701	19.0561	15.4913
	91	56510	45424	23076	39403	57956	76425	58789	43476	75041	5508	82985	71726	60020	75401	36269	47764	43358	26787	68006	56154	91	15.6139	12.5508	6.37599	10.8872	16.0135	21.1165	16.2436	12.0126	20.7341	1.52188	22.9291	19.8182	16.5838	20.8336	10.0213	13.1974	11.98	7.40136	18.7903	15.5156
	92	55409	45912	23915	39871	60370	78509	58873	43592	75994	5649	85886	72586	61108	75588	37062	48626	42998	27359	69158	56141	92	15.3097	12.6857	6.60781	11.0165	16.6805	21.6924	16.2669	12.0447	20.9975	1.56084	23.7307	20.0558	16.8844	20.8853	10.2404	13.4356	11.8805	7.55941	19.1086	15.512
	93	55236	45014	24176	41072	62089	79759	60674	45201	70777	5798	86033	73950	61617	77539	37695	49199	42894	27965	68111	56245	93	15.2619	12.4376	6.67993	11.3484	17.1554	22.0377	16.7645	12.4892	19.556	1.60201	23.7713	20.4327	17.025	21.4243	10.4153	13.5939	11.8518	7.72685	18.8194	15.5407
	94	56373	45288	24426	41297	63064	81161	60737	45285	67239	5817	87670	74851	62270	79844	38046	49374	42540	27750	69386	56970	94	15.5761	12.5133	6.74901	11.4105	17.4248	22.4251	16.7819	12.5124	18.5784	1.60726	24.2236	20.6816	17.2055	22.0612	10.5123	13.6422	11.754	7.66744	19.1716	15.741
	95	57908	46903	24673	42435	65177	82705	61238	46554	64467	5836	90311	75260	63874	79166	37552	52053	41790	28379	71064	56596	95	16.0002	12.9595	6.81725	11.725	18.0087	22.8517	16.9203	12.8631	17.8125	1.61251	24.9533	20.7947	17.6487	21.8739	10.3758	14.3825	11.5468	7.84124	19.6353	15.6377
	96	57698	48192	24970	43425	65432	83598	61332	47862	61514	14776	91034	75521	63940	80300	38492	50650	40440	28680	70753	57170	96	15.9422	13.3156	6.89931	11.9985	18.0791	23.0985	16.9463	13.2245	16.9966	4.08267	25.1531	20.8668	17.6669	22.1872	10.6355	13.9948	11.1737	7.9244	19.5493	15.7963
	97	56771	48141	25174	43678	68355	83875	61596	48475	57448	19566	93045	77602	65070	80431	39425	52238	39531	28689	70984	57359	97	15.6861	13.3016	6.95568	12.0684	18.8868	23.175	17.0192	13.3938	15.8731	5.40617	25.7087	21.4418	17.9791	22.2234	10.8933	14.4336	10.9226	7.92689	19.6132	15.8485
	98	59240	49260	26568	44716	69094	86845	62311	50372	56725	19511	95879	78064	65267	83350	39554	54091	38780	29015	73689	58318	98	16.3683	13.6107	7.34085	12.3552	19.091	23.9956	17.2168	13.918	15.6734	5.39097	26.4918	21.5694	18.0335	23.03	10.9289	14.9456	10.7151	8.01697	20.3606	16.1135
	99	59332	51001	26868	44552	70627	88651	62213	47437	55402	19986	96786	78009	65513	83567	40303	54372	36698	29213	73398	58083	99	16.3937	14.0918	7.42374	12.3099	19.5145	24.4946	17.1897	13.107	15.3078	5.52221	26.7424	21.5542	18.1015	23.0899	11.1359	15.0232	10.1398	8.07167	20.2802	16.0486
	100	60928	50971	27350	46259	71585	89353	62985	48469	54144	20250	96520	78956	67671	87211	40360	55635	35776	29509	75363	58806	100	16.8347	14.0835	7.55692	12.7816	19.7792	24.6886	17.403	13.3922	14.9602	5.59516	26.6689	21.8159	18.6978	24.0968	11.1516	15.3722	9.88506	8.15346	20.8231	16.2483
	101	59279	53022	27960	46379	71258	90631	65034	48575	54152	20509	98809	81501	67469	84955	40633	57255	34692	29719	76750	59086	101	16.379	14.6502	7.72546	12.8147	19.6889	25.0417	17.9692	13.4215	14.9624	5.66672	27.3013	22.5191	18.642	23.4734	11.2271	15.8198	9.58554	8.21148	21.2063	16.3257
	102	60121	53983	28590	46678	73955	92526	64832	48583	54437	20847	102087	81166	68474	87931	41085	57310	33557	30326	75631	59736	102	16.6117	14.9157	7.89954	12.8973	20.4341	25.5653	17.9134	13.4237	15.0412	5.76011	28.2071	22.4265	18.9197	24.2957	11.352	15.835	9.27194	8.3792	20.8972	16.5053
	103	61028	54630	28825	47149	74744	93059	66074	52018	52960	22035	100720	84593	70839	86924	41307	57120	33220	30406	75884	60654	103	16.8623	15.0945	7.96447	13.0275	20.6521	25.7126	18.2565	14.3728	14.6331	6.08836	27.8294	23.3734	19.5731	24.0175	11.4133	15.7825	9.17882	8.4013	20.9671	16.759
	104	61428	57516	28747	47367	76847	91925	68146	51607	53452	22299	102502	85058	70919	88727	42379	57665	33474	30961	75625	61528	104	16.9728	15.8919	7.94292	13.0877	21.2331	25.3993	18.829	14.2592	14.769	6.16131	28.3217	23.5019	19.5952	24.5156	11.7095	15.9331	9.24901	8.55465	20.8955	17.0004
	105	62330	57089	29161	48492	79370	95809	67948	50824	54017	22517	106884	86778	72786	90485	43248	58647	33594	31145	77224	61285	105	17.222	15.7739	8.05731	13.3985	21.9303	26.4724	18.7743	14.0429	14.9251	6.22154	29.5325	23.9771	20.1111	25.0014	11.9496	16.2044	9.28216	8.60549	21.3373	16.9333
	106	61439	59214	30550	49510	79857	95396	69663	51293	54175	23027	106616	91471	73783	94652	43473	59031	33473	31552	77763	62236	106	16.9759	16.3611	8.44109	13.6798	22.0648	26.3583	19.2482	14.1725	14.9688	6.36246	29.4584	25.2738	20.3865	26.1527	12.0118	16.3105	9.24873	8.71795	21.4862	17.1961
	107	65164	60157	30196	50470	80946	96930	71652	53048	54498	23620	109330	90379	74359	96303	43677	60717	34154	32206	78602	60800	107	18.0051	16.6216	8.34328	13.9451	22.3657	26.7822	19.7977	14.6574	15.058	6.5263	30.2083	24.9721	20.5457	26.6089	12.0681	16.7764	9.43689	8.89865	21.7181	16.7993
	108	64161	60740	31101	50503	81550	98868	72903	52251	54629	24119	108604	85732	75762	92231	44938	61493	35841	32189	78572	62116	108	17.728	16.7827	8.59334	13.9542	22.5326	27.3176	20.1434	14.4372	15.0942	6.66418	30.0077	23.6881	20.9334	25.4838	12.4166	16.9908	9.90302	8.89395	21.7098	17.1629
	109	64042	61378	32358	51218	81972	99184	73194	50624	54745	24242	110260	85091	76278	94309	44861	61377	36430	32602	79033	62861	109	17.6951	16.959	8.94065	14.1517	22.6492	27.405	20.2238	13.9876	15.1263	6.69817	30.4653	23.511	21.0759	26.058	12.3953	16.9587	10.0658	9.00807	21.8371	17.3688
	110	65452	63028	31829	51895	83789	100757	74685	51762	55371	25059	111379	90300	77729	92152	45373	63367	39549	32640	81410	62636	110	18.0847	17.4149	8.79448	14.3388	23.1512	27.8396	20.6358	14.3021	15.2992	6.92391	30.7745	24.9503	21.4768	25.462	12.5367	17.5086	10.9276	9.01857	22.4939	17.3066
	111	65686	63934	32122	52014	85371	103782	77117	52346	55766	25479	113305	88245	78963	95425	45762	62015	40648	33439	81309	63198	111	18.1493	17.6652	8.87544	14.3717	23.5884	28.6754	21.3077	14.4634	15.4084	7.03995	31.3066	24.3825	21.8178	26.3663	12.6442	17.135	11.2312	9.23933	22.466	17.4619
	112	65001	66697	32786	52232	88666	102937	78771	54447	54949	25870	115098	106770	79163	99811	45572	62910	43360	33543	81001	63011	112	17.96	18.4287	9.05891	14.4319	24.4988	28.4419	21.7648	15.0439	15.1826	7.14799	31.8021	29.501	21.8731	27.5782	12.5917	17.3823	11.9805	9.26807	22.3809	17.4102
	113	67897	67042	32821	53156	89538	104288	79727	53599	56271	25759	115740	107113	79157	100508	46660	63282	43501	33986	84056	63966	113	18.7602	18.524	9.06858	14.6872	24.7397	28.8152	22.0289	14.8096	15.5479	7.11732	31.9794	29.5958	21.8714	27.7708	12.8924	17.4851	12.0195	9.39047	23.225	17.6741
	114	61085	67198	33907	53547	90720	103337	82233	51138	55608	26265	116885	103290	78466	101140	46900	62188	45834	34435	83726	63292	114	16.878	18.5671	9.36865	14.7953	25.0663	28.5524	22.7213	14.1296	15.3647	7.25713	32.2958	28.5395	21.6805	27.9454	12.9587	17.1828	12.6641	9.51453	23.1338	17.4878
	115	61368	69556	34317	53379	91297	104240	83285	51264	56394	26630	119714	99020	79799	102859	48095	64177	46637	34612	82189	63973	115	16.9562	19.2186	9.48193	14.7488	25.2257	28.8019	23.012	14.1645	15.5819	7.35798	33.0775	27.3596	22.0488	28.4204	13.2888	17.7324	12.886	9.56344	22.7092	17.676
	116	63859	68984	34829	54731	92779	107067	83815	52480	54918	27231	121690	92090	80219	106330	47530	64228	44966	34570	84966	64630	116	17.6445	19.0606	9.6234	15.1224	25.6352	29.5831	23.1584	14.5004	15.1741	7.52404	33.6235	25.4448	22.1648	29.3794	13.1327	17.7465	12.4243	9.55183	23.4765	17.8575
	117	65210	71072	35854	55740	95489	108240	84943	52576	55632	27967	121303	92045	79857	105415	48464	64911	45491	35251	85534	64097	117	18.0178	19.6375	9.90661	15.4012	26.384	29.9072	23.4701	14.527	15.3714	7.7274	33.5165	25.4324	22.0648	29.1266	13.3908	17.9352	12.5694	9.74	23.6334	17.7103
	118	76197	73383	35702	56068	95779	107753	86124	52700	55818	27999	123281	94459	80667	106191	49502	65665	47609	35534	84996	64126	118	21.0535	20.276	9.86461	15.4918	26.4641	29.7726	23.7964	14.5612	15.4227	7.73624	34.0631	26.0994	22.2886	29.341	13.6776	18.1435	13.1546	9.81819	23.4847	17.7183
	119	79892	73821	36397	57742	97430	108982	87722	54080	56545	28157	126433	93896	82529	109897	49480	66533	45438	35805	88123	64860	119	22.0745	20.397	10.0566	15.9544	26.9203	30.1122	24.238	14.9425	15.6236	7.7799	34.934	25.9439	22.8031	30.365	13.6715	18.3833	12.5547	9.89307	24.3488	17.9211
	120	66204	75769	36392	57806	98513	111843	88287	54385	56564	28753	125310	94485	84136	109832	49199	66771	47155	36133	88964	65592	120	18.2924	20.9353	10.0553	15.972	27.2196	30.9027	24.3941	15.0268	15.6289	7.94457	34.6237	26.1066	23.2471	30.347	13.5939	18.4491	13.0291	9.9837	24.5811	18.1233
	121	69153	75767	37812	57900	99849	111988	90444	53608	56560	30208	130500	95129	82686	109035	50294	67864	46895	36199	88170	65750	121	19.1073	20.9347	10.4476	15.998	27.5887	30.9427	24.9901	14.8121	15.6278	8.3466	36.0577	26.2845	22.8465	30.1268	13.8964	18.7511	12.9573	10.0019	24.3617	18.167
	122	67949	77583	37779	58922	100953	110964	91592	54732	56358	30293	129368	96762	84981	108393	51018	68063	46722	36617	87012	65959	122	18.7746	21.4365	10.4385	16.2804	27.8937	30.6598	25.3073	15.1227	15.5719	8.37008	35.7449	26.7357	23.4806	29.9494	14.0965	18.8061	12.9095	10.1174	24.0418	18.2247
	123	74528	79143	38841	59300	103948	110832	92377	57581	56629	30690	129697	95224	85384	113872	51714	68013	47072	36995	92019	68155	123	20.5924	21.8675	10.7319	16.3848	28.7213	30.6233	25.5241	15.9099	15.6468	8.47977	35.8358	26.3108	23.592	31.4633	14.2888	18.7923	13.0062	10.2219	25.4252	18.8315
	124	68675	80733	39550	60005	104020	111769	93323	56082	56318	31614	131428	99269	86800	114486	51399	69754	46715	37602	91120	67666	124	18.9752	22.3069	10.9278	16.5796	28.7412	30.8822	25.7855	15.4957	15.5609	8.73508	36.3141	27.4284	23.9832	31.633	14.2018	19.2733	12.9075	10.3896	25.1768	18.6964
	125	69627	80885	39587	60801	105509	113760	93422	54755	56948	32010	134010	96221	87253	114645	51969	70200	46353	37742	90547	66571	125	19.2382	22.3489	10.9381	16.7996	29.1526	31.4324	25.8129	15.129	15.735	8.8445	37.0275	26.5863	24.1084	31.6769	14.3593	19.3966	12.8075	10.4283	25.0185	18.3938
	126	71651	83096	40321	60975	108079	114320	93870	55108	57148	33108	138484	99177	87799	117515	52210	70762	47355	38133	92525	66955	126	19.7975	22.9598	11.1409	16.8476	29.8627	31.5871	25.9367	15.2266	15.7902	9.14788	38.2637	27.403	24.2592	32.4699	14.4258	19.5518	13.0844	10.5363	25.565	18.4999
	127	72606	82488	40806	61875	109901	115099	94203	55910	57168	33640	137736	101181	88548	115824	52865	71866	47632	38347	90876	67914	127	20.0613	22.7918	11.2749	17.0963	30.3661	31.8023	26.0287	15.4482	15.7958	9.29487	38.057	27.9567	24.4662	32.0027	14.6068	19.8569	13.1609	10.5954	25.1094	18.7649
	128	74054	83426	42029	62892	109644	113032	96754	56801	58569	32929	141520	104592	89230	117600	54079	72075	47112	39088	91215	67294	128	20.4614	23.051	11.6128	17.3773	30.2951	31.2312	26.7335	15.6944	16.1829	9.09842	39.1026	28.8992	24.6546	32.4934	14.9423	19.9146	13.0172	10.8002	25.2031	18.5936
	129	73200	84830	42144	63846	109951	114156	96992	58113	59335	34197	140169	104114	90733	118394	54392	72620	48047	39293	93659	67060	129	20.2255	23.4389	11.6446	17.6409	30.3799	31.5418	26.7993	16.0569	16.3945	9.44877	38.7293	28.7671	25.0699	32.7128	15.0287	20.0652	13.2756	10.8568	25.8784	18.529
	130	74680	87139	42016	65107	111341	116310	98399	57279	59170	34580	142616	103050	92309	120275	54091	71427	47712	39931	94563	66845	130	20.6344	24.0769	11.6092	17.9893	30.764	32.1369	27.1881	15.8264	16.3489	9.5546	39.4054	28.4731	25.5054	33.2325	14.9456	19.7356	13.183	11.0331	26.1281	18.4696
	131	76229	87039	43323	65984	112636	114927	99613	57771	59994	36132	144784	104625	92458	120801	55273	72828	47834	39946	93107	67846	131	21.0624	24.0492	11.9703	18.2317	31.1218	31.7548	27.5235	15.9624	16.5766	9.98342	40.0044	28.9083	25.5465	33.3778	15.2722	20.1227	13.2167	11.0372	25.7259	18.7461
	132	76844	87650	44920	65907	112860	115165	100181	57183	60120	35140	147685	105225	90556	118091	55463	73018	49120	40486	93452	68679	132	21.2323	24.2181	12.4116	18.2104	31.1837	31.8206	27.6804	15.7999	16.6114	9.70933	40.806	29.0741	25.021	32.629	15.3247	20.1752	13.5721	11.1865	25.8212	18.9763
	133	75952	88342	44720	67825	115651	114910	101889	61420	60143	35931	144667	106322	89748	119579	56924	73510	48469	40634	94899	68955	133	20.9859	24.4093	12.3563	18.7403	31.9549	31.7501	28.1524	16.9706	16.6178	9.92788	39.9721	29.3772	24.7977	33.0402	15.7283	20.3111	13.3922	11.2273	26.221	19.0526
	134	78221	89244	45090	67095	117927	116026	101527	60936	61272	36295	147978	106424	92555	121605	56267	74156	49239	40622	92837	68868	134	21.6128	24.6585	12.4586	18.5386	32.5837	32.0585	28.0523	16.8369	16.9297	10.0285	40.8869	29.4054	25.5733	33.6	15.5468	20.4896	13.6049	11.224	25.6512	19.0285
	135	80463	90162	46780	68284	118878	118360	103284	60990	62160	37271	148325	109077	93459	122222	57848	74879	49564	41397	92845	68719	135	22.2323	24.9121	12.9255	18.8672	32.8465	32.7034	28.5378	16.8518	17.1751	10.2981	40.9828	30.1384	25.8231	33.7704	15.9836	20.6894	13.6947	11.4382	25.6535	18.9873
	136	80801	92678	47369	69450	120957	118534	104188	60550	61727	36309	148510	108182	95416	121436	57013	75360	51061	41719	93397	69155	136	22.3257	25.6073	13.0883	19.1893	33.4209	32.7514	28.7876	16.7302	17.0554	10.0323	41.0339	29.8911	26.3638	33.5533	15.7529	20.8223	14.1084	11.5271	25.806	19.1078
	137	82979	93089	48263	70630	119221	118827	106039	59504	62513	37614	151657	108353	94069	120814	57698	76280	52532	42063	96185	69487	137	22.9274	25.7209	13.3353	19.5154	32.9413	32.8324	29.299	16.4412	17.2726	10.3929	41.9035	29.9384	25.9917	33.3814	15.9422	21.0765	14.5148	11.6222	26.5763	19.1995
	138	82136	94047	48739	70654	120786	122205	105662	59431	63799	38256	155700	109680	93809	119361	57221	76555	51639	42804	94801	68597	138	22.6945	25.9856	13.4668	19.522	33.3737	33.7657	29.1948	16.421	17.6279	10.5703	43.0206	30.305	25.9198	32.9799	15.8104	21.1525	14.2681	11.8269	26.1939	18.9536
	139	82484	94383	48529	71721	123671	120941	107539	60157	63712	38943	153082	110155	97017	121708	58654	77705	52810	42718	94210	69251	139	22.7907	26.0784	13.4088	19.8168	34.1708	33.4165	29.7135	16.6216	17.6039	10.7601	42.2972	30.4363	26.8062	33.6284	16.2063	21.4702	14.5916	11.8032	26.0306	19.1343
	140	83997	95298	49020	72414	123694	122500	107972	62555	62827	39828	153348	109811	97431	118389	58706	77895	52258	43329	95227	69359	140	23.2087	26.3312	13.5444	20.0083	34.1772	33.8473	29.8331	17.2842	17.3594	11.0046	42.3707	30.3412	26.9206	32.7114	16.2207	21.5227	14.4391	11.972	26.3116	19.1642
	141	84693	97389	49323	73147	126513	123542	108498	63246	63673	40792	156180	109653	97812	119521	57790	79499	53132	43690	93867	70241	141	23.401	26.909	13.6281	20.2108	34.9561	34.1352	29.9784	17.4751	17.5931	11.271	43.1532	30.2976	27.0259	33.0241	15.9676	21.9659	14.6806	12.0717	25.9358	19.4079
	142	85821	99295	50947	75121	130639	123749	109173	62604	64912	40434	159201	112852	99247	119055	59374	78272	54102	44796	96910	70193	142	23.7127	27.4356	14.0769	20.7562	36.0961	34.1924	30.165	17.2977	17.9355	11.1721	43.9879	31.1815	27.4224	32.8954	16.4053	21.6269	14.9486	12.3773	26.7766	19.3946
	143	86098	101333	51230	75010	162296	122013	108737	63513	64445	41085	159193	114803	98749	120754	60036	79779	53262	44968	95857	70743	143	23.7892	27.9987	14.1551	20.7256	44.8431	33.7127	30.0445	17.5489	17.8064	11.352	43.9857	31.7205	27.2848	33.3648	16.5882	22.0433	14.7165	12.4248	26.4857	19.5466
	144	86653	100581	52227	75909	128850	123594	110557	64304	64112	41307	157831	113723	101131	120697	61852	78269	54484	45106	95870	71271	144	23.9426	27.7909	14.4305	20.974	35.6018	34.1495	30.5474	17.7675	17.7144	11.4133	43.6094	31.4221	27.9429	33.3491	17.09	21.626	15.0542	12.463	26.4893	19.6925
	145	89441	103080	53335	77219	140324	127291	111814	61967	64160	42043	162755	115412	101123	121507	61631	78522	55841	45481	95180	71234	145	24.7129	28.4814	14.7367	21.3359	38.7721	35.171	30.8947	17.1217	17.7277	11.6167	44.9699	31.8888	27.9407	33.5729	17.0289	21.696	15.4291	12.5666	26.2986	19.6823
	146	89489	105127	54406	78292	133077	127896	113845	63051	65483	41718	164383	114888	103429	126121	61923	79379	55831	45954	96283	71539	146	24.7262	29.047	15.0326	21.6324	36.7697	35.3382	31.4558	17.4213	18.0932	11.5269	45.4197	31.744	28.5779	34.8478	17.1096	21.9327	15.4263	12.6973	26.6034	19.7665
	147	87464	105374	54123	78891	130518	128992	113168	67213	66384	42137	163096	117201	103340	124248	61532	80111	55546	45894	97042	71659	147	24.1667	29.1153	14.9544	21.7979	36.0627	35.641	31.2688	18.5712	18.3422	11.6426	45.0641	32.3831	28.5533	34.3302	17.0015	22.135	15.3476	12.6807	26.8131	19.7997
	148	92290	109982	54461	80325	131063	129625	118296	65075	67473	42371	167323	117780	105313	126984	61830	80633	56534	46367	98127	70748	148	25.5001	30.3885	15.0478	22.1941	36.2133	35.8159	32.6857	17.9805	18.6431	11.7073	46.232	32.5431	29.0984	35.0862	17.0839	22.2792	15.6206	12.8114	27.1129	19.548
	149	91006	108831	53894	81558	132209	130067	116747	67477	68553	43060	167607	119995	106413	126574	63441	81317	57257	46946	96083	71705	149	25.1453	30.0705	14.8911	22.5348	36.5299	35.9381	32.2577	18.6442	18.9415	11.8977	46.3105	33.1551	29.4024	34.9729	17.529	22.4682	15.8203	12.9714	26.5481	19.8124
	150	90872	111406	55140	82149	134999	129518	116233	68475	67772	42350	165117	116433	126143	124908	63313	83142	59950	47672	99405	71825	150	25.1083	30.7819	15.2354	22.6981	37.3008	35.7864	32.1157	18.9199	18.7257	11.7015	45.6225	32.1709	34.8538	34.5126	17.4936	22.9725	16.5644	13.172	27.466	19.8455
	151	95889	113572	54909	82581	135867	128416	114925	66603	68068	43841	170266	118855	106913	127214	63885	84457	56722	47967	103378	71269	151	26.4945	31.3804	15.1716	22.8175	37.5406	35.4819	31.7543	18.4027	18.8075	12.1135	47.0452	32.8401	29.5405	35.1498	17.6517	23.3358	15.6725	13.2535	28.5638	19.6919
	152	95533	114499	55621	84062	138143	131248	115815	69432	68226	44169	171359	117441	108405	128774	63687	82051	58198	47789	100594	72135	152	26.3962	31.6365	15.3683	23.2267	38.1695	36.2644	32.0002	19.1844	18.8511	12.2041	47.3472	32.4494	29.9528	35.5808	17.597	22.671	16.0803	13.2043	27.7945	19.9312
	153	92912	115800	57196	84243	139298	130145	115637	66735	69343	44415	173882	118605	114038	129924	62995	84530	59218	48431	101497	72997	153	25.672	31.996	15.8035	23.2767	38.4886	35.9596	31.951	18.4392	19.1598	12.272	48.0443	32.7711	31.5092	35.8985	17.4058	23.356	16.3622	13.3817	28.044	20.1694
	154	92466	117957	57228	84622	139360	133013	118560	66696	69394	44996	171800	122482	129543	129450	63552	85526	59774	49119	102095	71747	154	25.5487	32.592	15.8123	23.3814	38.5057	36.752	32.7586	18.4284	19.1739	12.4326	47.4691	33.8423	35.7933	35.7676	17.5597	23.6312	16.5158	13.5718	28.2093	19.824
	155	96282	117277	58261	86922	140418	131827	120267	69941	68738	44559	177348	120498	128132	129513	64686	85089	61223	48974	101417	73130	155	26.6031	32.4041	16.0978	24.0169	38.7981	36.4243	33.2303	19.325	18.9926	12.3118	49.002	33.2941	35.4034	35.785	17.873	23.5104	16.9162	13.5317	28.0219	20.2061
	156	96648	118710	59388	86824	143158	130386	120844	71083	70034	45871	174582	120398	115909	131787	65488	87416	61940	49384	101798	73333	156	26.7042	32.8001	16.4092	23.9898	39.5552	36.0262	33.3897	19.6405	19.3507	12.6743	48.2377	33.2665	32.0261	36.4133	18.0946	24.1534	17.1143	13.645	28.1272	20.2622
	157	99860	119621	59792	87334	142801	131584	121277	71720	69610	46543	176495	120326	113376	132526	65769	88013	63624	51132	101262	73074	157	27.5917	33.0518	16.5208	24.1307	39.4565	36.3572	33.5093	19.8165	19.2335	12.86	48.7663	33.2466	31.3263	36.6175	18.1722	24.3184	17.5796	14.128	27.9791	20.1906
	158	99613	120929	59777	88406	145167	131563	121571	70734	70496	47280	175796	124225	112885	136679	66251	92754	63896	50294	102425	72801	158	27.5235	33.4132	16.5166	24.4269	40.1102	36.3514	33.5906	19.5441	19.4783	13.0637	48.5732	34.3239	31.1906	37.765	18.3054	25.6283	17.6547	13.8964	28.3005	20.1152
	159	102866	123558	61199	89830	148116	135994	122406	70761	71339	47271	178461	122326	114958	138761	66905	89765	64612	50723	103977	72987	159	28.4223	34.1396	16.9095	24.8204	40.9251	37.5757	33.8213	19.5516	19.7113	13.0612	49.3095	33.7992	31.7634	38.3402	18.4861	24.8024	17.8526	14.015	28.7293	20.1666
	160	105424	122656	62205	90660	157186	134097	122443	72027	70920	47175	179450	122854	117141	148325	67126	89932	65297	51788	103637	72411	160	29.1291	33.8904	17.1875	25.0497	43.4311	37.0516	33.8315	19.9014	19.5955	13.0346	49.5828	33.9451	32.3665	40.9828	18.5472	24.8486	18.0418	14.3092	28.6353	20.0075
	161	101302	123546	62971	92017	147188	135660	124918	71327	72875	48344	181044	125298	121869	137870	68277	89581	64682	51661	104801	74343	161	27.9902	34.1363	17.3991	25.4247	40.6687	37.4834	34.5154	19.7079	20.1357	13.3576	50.0232	34.6204	33.6729	38.0941	18.8652	24.7516	17.8719	14.2741	28.957	20.5413
	162	100160	125818	63874	92540	148623	134671	125032	75006	71464	48955	184140	121496	127920	137155	69573	91460	66036	51785	104528	75012	162	27.6746	34.764	17.6487	25.5692	41.0652	37.2102	34.5469	20.7245	19.7458	13.5265	50.8786	33.5698	35.3448	37.8965	19.2233	25.2708	18.246	14.3084	28.8815	20.7261
	163	101345	126965	62886	92736	147758	133971	124164	74903	71721	50078	189544	125758	133781	137658	70600	90746	66498	52463	105015	74455	163	28.002	35.081	17.3757	25.6233	40.8261	37.0167	34.307	20.696	19.8168	13.8368	52.3718	34.7475	36.9642	38.0355	19.5071	25.0735	18.3737	14.4957	29.0161	20.5722
	164	105892	128682	64445	93721	151998	134517	127058	72144	71792	49725	183242	124662	133191	142326	69139	89621	69334	53013	105454	74113	164	29.2584	35.5554	17.8064	25.8955	41.9977	37.1676	35.1067	19.9337	19.8364	13.7392	50.6305	34.4446	36.8012	39.3253	19.1034	24.7627	19.1573	14.6477	29.1374	20.4777
	165	109420	129904	65373	95132	150914	134973	129906	75786	73410	51445	192120	125567	136873	140648	70458	93273	69068	53089	106246	75400	165	30.2332	35.893	18.0628	26.2854	41.6982	37.2936	35.8936	20.94	20.2835	14.2145	53.0836	34.6947	37.8186	38.8616	19.4678	25.7717	19.0838	14.6687	29.3562	20.8333
	166	107072	132056	67267	96870	151835	138056	128108	75851	72628	50968	189765	128185	137211	141570	70401	94844	71009	53651	106492	74306	166	29.5844	36.4876	18.5862	26.7656	41.9526	38.1454	35.3968	20.9579	20.0674	14.0827	52.4329	35.418	37.912	39.1164	19.4521	26.2058	19.6201	14.824	29.4242	20.5311
	167	112184	134043	66625	96434	153705	137431	129015	75618	73236	51494	204675	127126	143543	139332	71044	94097	68921	53791	107010	74394	167	30.9969	37.0366	18.4088	26.6451	42.4693	37.9728	35.6474	20.8936	20.2354	14.228	56.5526	35.1254	39.6615	38.498	19.6298	25.9994	19.0432	14.8627	29.5673	20.5554
	168	107575	133142	67239	97340	153278	140162	128646	77123	73585	52372	183603	129308	139748	139943	70603	97013	72350	54640	106675	75159	168	29.7234	36.7877	18.5784	26.8954	42.3513	38.7273	35.5454	21.3094	20.3318	14.4706	50.7303	35.7283	38.613	38.6668	19.5079	26.8051	19.9906	15.0973	29.4747	20.7667
	169	111374	134267	68824	99083	156187	138694	127208	75990	73072	52930	191284	129369	138002	142890	72742	97631	72817	54874	107805	76662	169	30.7731	37.0985	19.0164	27.377	43.1551	38.3217	35.1481	20.9964	20.1901	14.6248	52.8526	35.7452	38.1305	39.4811	20.0989	26.9759	20.1196	15.1619	29.787	21.182
	170	110961	137723	70106	100169	154397	140666	125682	76110	74710	53742	188193	131591	138691	140110	71972	97847	73111	54702	108077	76411	170	30.659	38.0534	19.3706	27.6771	42.6605	38.8666	34.7265	21.0295	20.6427	14.8491	51.9985	36.3591	38.3209	38.713	19.8862	27.0355	20.2009	15.1144	29.8621	21.1127
	171	115649	136513	70740	99594	156463	145874	129402	78335	74793	53628	191110	130975	137043	145030	71618	95272	73056	55267	106965	76462	171	31.9543	37.7191	19.5458	27.5182	43.2314	40.3056	35.7543	21.6443	20.6656	14.8176	52.8045	36.1889	37.8656	40.0724	19.7884	26.324	20.1857	15.2705	29.5549	21.1268
	172	115189	138794	72541	103066	159663	144211	130264	81611	76230	54712	192238	130996	135011	148672	73540	95806	74028	55861	108541	76029	172	31.8272	38.3494	20.0434	28.4776	44.1156	39.8461	35.9925	22.5495	21.0627	15.1172	53.1162	36.1947	37.3041	41.0787	20.3194	26.4716	20.4542	15.4346	29.9903	21.0071
	173	112629	139158	74452	104048	159286	144166	129966	78684	75740	55638	193308	131444	133842	149026	75081	98177	75822	56161	109589	76523	173	31.1199	38.4499	20.5714	28.7489	44.0114	39.8337	35.9101	21.7407	20.9273	15.373	53.4118	36.3185	36.9811	41.1765	20.7452	27.1267	20.9499	15.5175	30.2799	21.1436
	174	115565	140288	74329	104423	162103	148222	130634	81306	76848	56100	196554	131670	132309	157669	74604	95341	76354	56321	111235	75850	174	31.9311	38.7622	20.5374	28.8525	44.7897	40.9544	36.0947	22.4652	21.2334	15.5007	54.3087	36.381	36.5575	43.5646	20.6134	26.3431	21.0969	15.5617	30.7347	20.9577
	175	110500	142274	75880	104116	162111	144809	132433	80841	77061	56081	196628	131331	137548	152451	76571	98635	74423	56328	110272	77007	175	30.5316	39.3109	20.966	28.7677	44.7919	40.0113	36.5918	22.3367	21.2923	15.4954	54.3291	36.2873	38.0051	42.1228	21.1569	27.2533	20.5634	15.5637	30.4686	21.2774
	176	112674	140961	76986	105301	165221	144717	132208	80683	78031	56124	199191	134561	140391	153228	74880	97597	76773	57083	110121	77842	176	31.1323	38.9481	21.2716	29.0951	45.6512	39.9859	36.5296	22.293	21.5603	15.5073	55.0373	37.1798	38.7906	42.3375	20.6897	26.9665	21.2127	15.7723	30.4269	21.5081
	177	115002	142845	77402	104196	215041	146239	134398	79827	78346	57493	199098	131092	144733	153471	73821	98885	74572	57536	110543	77256	177	31.7755	39.4687	21.3865	28.7898	59.4167	40.4064	37.1347	22.0565	21.6473	15.8856	55.0116	36.2213	39.9903	42.4047	20.397	27.3223	20.6046	15.8974	30.5435	21.3462
	178	114273	144805	77123	105935	164168	148992	135161	81345	79515	58443	198880	135143	142838	148232	75952	100864	76232	57831	112459	77745	178	31.5741	40.0102	21.3094	29.2703	45.3603	41.1671	37.3455	22.476	21.9703	16.148	54.9514	37.3406	39.4667	40.9571	20.9859	27.8691	21.0632	15.9789	31.0729	21.4813
	179	114959	149122	79362	104880	171494	148158	135877	82002	80056	58826	201456	136998	140650	146991	77297	99205	77222	58194	111051	78370	179	31.7636	41.203	21.9281	28.9788	47.3845	40.9367	37.5434	22.6575	22.1198	16.2539	55.6631	37.8531	38.8622	40.6142	21.3575	27.4108	21.3368	16.0792	30.6839	21.654
	180	121247	147462	82409	104997	169853	152314	137996	76731	79220	58208	205309	135365	141362	145754	76129	99732	76281	58468	111606	77977	180	33.501	40.7444	22.7699	29.0111	46.9311	42.085	38.1289	21.2011	21.8888	16.0831	56.7277	37.4019	39.0589	40.2724	21.0348	27.5564	21.0768	16.155	30.8372	21.5454
	181	121528	150798	82816	106931	168347	149857	139425	77582	79714	58451	203663	136650	145028	152089	77308	101461	78159	59254	113711	77916	181	33.5787	41.6661	22.8824	29.5455	46.515	41.4061	38.5237	21.4362	22.0253	16.1503	56.2729	37.757	40.0718	42.0228	21.3605	28.0341	21.5957	16.3721	31.4188	21.5285
	182	118549	153528	83170	107585	169444	150138	141452	76532	79433	59793	206335	134819	145947	153205	77837	100989	82714	59374	110865	76883	182	32.7556	42.4204	22.9802	29.7262	46.8181	41.4838	39.0838	21.1461	21.9477	16.5211	57.0112	37.251	40.3258	42.3312	21.5067	27.9037	22.8542	16.4053	30.6325	21.2431
	183	120824	152174	84017	106446	171154	148765	144447	78678	79950	58924	204170	137617	150104	154765	77970	101823	79911	59858	112750	77898	183	33.3842	42.0463	23.2142	29.4115	47.2906	41.1044	39.9113	21.7391	22.0905	16.2809	56.413	38.0241	41.4744	42.7622	21.5434	28.1341	22.0797	16.539	31.1533	21.5235
	184	121241	154028	85187	109212	171423	149103	146142	79772	81560	59658	203644	137999	150211	154333	77484	100905	80288	61315	112592	78776	184	33.4994	42.5586	23.5375	30.1757	47.3649	41.1978	40.3796	22.0413	22.5354	16.4838	56.2677	38.1297	41.5039	42.6428	21.4092	27.8805	22.1839	16.9416	31.1096	21.7661
	185	125481	155938	87046	110686	173058	150748	144740	77835	81625	61223	206144	140315	148664	151487	78778	103667	80773	60335	115785	79903	185	34.6709	43.0863	24.0512	30.583	47.8166	41.6523	39.9923	21.5061	22.5533	16.9162	56.9584	38.7696	41.0765	41.8565	21.7667	28.6436	22.3179	16.6708	31.9919	22.0775
	186	122030	156527	87107	109245	176686	153270	141583	79238	81761	62488	208033	141388	144247	159004	78851	103668	82799	60888	113034	78973	186	33.7174	43.2491	24.068	30.1848	48.8191	42.3491	39.12	21.8938	22.5909	17.2657	57.4804	39.0661	39.856	43.9335	21.7869	28.6439	22.8777	16.8236	31.2318	21.8206
	187	121097	158374	89184	110510	174904	154153	144336	80893	83090	63023	210039	141505	147875	154537	78684	104803	81500	61646	113725	79163	187	33.4596	43.7594	24.6419	30.5344	48.3267	42.5931	39.8806	22.3511	22.9581	17.4135	58.0346	39.0984	40.8585	42.6992	21.7407	28.9575	22.5188	17.033	31.4227	21.8731
	188	122133	157847	89394	113561	174497	154379	142697	79998	83186	37718	211921	139690	148169	156369	80491	103609	82557	61770	114976	79105	188	33.7459	43.6138	24.6999	31.3774	48.2142	42.6556	39.4278	22.1038	22.9846	10.4216	58.5547	38.5969	40.9397	43.2054	22.24	28.6276	22.8108	17.0673	31.7683	21.857
	189	123116	163275	89389	114161	184220	152725	145317	83317	83466	67188	211037	137660	148678	156424	79122	106831	84471	61897	113029	79877	189	34.0175	45.1136	24.6986	31.5432	50.9008	42.1986	40.1517	23.0208	23.062	18.5643	58.3104	38.036	41.0803	43.2206	21.8617	29.5178	23.3397	17.1024	31.2304	22.0703
	190	125983	164252	91588	113831	177662	156462	147550	82963	84036	55900	211867	143048	145713	156535	80423	103925	86583	62395	115751	79628	190	34.8096	45.3835	25.3061	31.452	49.0887	43.2311	40.7687	22.923	23.2195	15.4454	58.5397	39.5248	40.2611	43.2513	22.2212	28.7149	23.9232	17.24	31.9825	22.0015
	191	120281	163465	92923	114704	179918	155475	147243	82854	83893	64737	208835	145234	144532	151227	79360	105626	84507	62437	119152	79913	191	33.2341	45.1661	25.675	31.6932	49.7121	42.9584	40.6839	22.8929	23.18	17.8871	57.702	40.1288	39.9348	41.7846	21.9275	29.1849	23.3496	17.2516	32.9222	22.0803
	192	129382	166050	93086	117308	179918	157148	148675	83633	84466	67256	211385	141276	141222	156859	80095	107231	85309	62976	117627	79789	192	35.7488	45.8803	25.72	32.4127	49.7121	43.4206	41.0795	23.1081	23.3383	18.5831	58.4066	39.0351	39.0202	43.3408	22.1306	29.6284	23.5712	17.4005	32.5008	22.046
	193	126347	166747	93822	118975	182348	162055	148933	83019	84236	69434	213867	142964	139386	158338	80922	108363	84844	62603	115162	80552	193	34.9102	46.0729	25.9234	32.8733	50.3835	44.7765	41.1508	22.9385	23.2748	19.1849	59.0923	39.5015	38.5129	43.7494	22.3591	29.9411	23.4427	17.2975	31.8197	22.2569
	194	129171	168684	95416	119411	185559	162059	146846	82464	84644	68745	211901	144999	141136	159964	83018	108374	84622	63488	116178	79775	194	35.6905	46.6081	26.3638	32.9938	51.2707	44.7776	40.5742	22.7851	23.3875	18.9945	58.5491	40.0638	38.9965	44.1987	22.9382	29.9442	23.3814	17.542	32.1005	22.0422
	195	131169	168279	95689	119513	183465	165789	151245	86058	84832	44685	211324	147119	140517	161911	81791	108727	88346	63475	115280	80082	195	36.2425	46.4962	26.4393	33.0219	50.6921	45.8082	41.7896	23.7782	23.4394	12.3467	58.3897	40.6496	38.8254	44.7367	22.5992	30.0417	24.4104	17.5384	31.8523	22.127
	196	127611	170987	96861	120988	185594	169659	148949	85949	85169	73299	216516	145384	138067	159317	80339	109014	87712	63862	116466	79887	196	35.2594	47.2444	26.7631	33.4295	51.2804	46.8775	41.1552	23.7481	23.5325	20.2528	59.8243	40.1702	38.1485	44.0199	22.198	30.121	24.2352	17.6453	32.18	22.0731
	197	129096	172188	98766	121108	183627	166744	148856	86109	85764	72184	216782	144080	138135	159358	84474	110256	89746	64883	116327	81810	197	35.6698	47.5763	27.2895	33.4626	50.7369	46.0721	41.1295	23.7923	23.6969	19.9447	59.8978	39.8099	38.1673	44.0313	23.3405	30.4642	24.7972	17.9274	32.1416	22.6044
	198	127017	171696	100228	121911	185823	163968	151668	85037	85892	72710	222245	145175	138894	160190	83669	109567	88294	64955	119931	81560	198	35.0953	47.4403	27.6934	33.6845	51.3437	45.305	41.9065	23.4961	23.7323	20.0901	61.4072	40.1125	38.377	44.2612	23.1181	30.2738	24.396	17.9473	33.1374	22.5354
	199	130542	173557	99817	121856	187091	168584	150308	87605	86883	73281	220250	146798	140040	161093	83428	108221	89504	65086	118996	80450	199	36.0693	47.9545	27.5799	33.6693	51.694	46.5805	41.5307	24.2056	24.0061	20.2478	60.856	40.5609	38.6936	44.5107	23.0515	29.9019	24.7303	17.9835	32.8791	22.2287
	200	129962	174378	101124	124019	188095	166607	151472	88315	88159	72326	223285	147692	141379	164908	83530	118268	91466	65943	116965	81596	200	35.909	48.1814	27.941	34.267	51.9714	46.0342	41.8523	24.4018	24.3587	19.984	61.6946	40.8079	39.0636	45.5648	23.0797	32.6779	25.2724	18.2203	32.3179	22.5453
	201	131092	174309	100881	123860	188431	168123	152632	87921	87921	73779	220294	146613	140617	163088	86367	113272	90630	67270	119404	80955	201	36.2213	48.1623	27.8738	34.223	52.0643	46.4531	42.1729	24.2929	24.2929	20.3854	60.8681	40.5098	38.8531	45.0619	23.8636	31.2975	25.0414	18.587	32.9918	22.3682
	202	131055	177605	102758	125473	190081	166745	152328	87902	87432	74454	223218	151475	138127	162622	86256	111295	92296	66809	118941	84612	202	36.211	49.073	28.3925	34.6687	52.5202	46.0723	42.0889	24.2877	24.1578	20.5719	61.6761	41.8532	38.1651	44.9331	23.8329	30.7513	25.5018	18.4596	32.8639	23.3786
	203	127267	181376	104149	127920	192269	168012	152025	89016	88463	74529	224741	147057	143266	163457	86508	112220	92925	67148	118858	90156	203	35.1644	50.1149	28.7768	35.3448	53.1247	46.4224	42.0051	24.5955	24.4427	20.5927	62.0969	40.6325	39.585	45.1638	23.9025	31.0069	25.6756	18.5533	32.841	24.9105
	204	132024	180319	105882	126448	192122	167284	151145	87875	90202	75043	222969	149477	142230	167099	87107	115737	93419	67279	122183	80530	204	36.4788	49.8229	29.2556	34.9381	53.0841	46.2213	41.762	24.2802	24.9232	20.7347	61.6073	41.3011	39.2987	46.1701	24.068	31.9786	25.8121	18.5895	33.7597	22.2508
	205	128042	182101	105078	129074	193342	168177	153546	89404	88872	75452	225923	154908	142567	162634	86087	120720	92822	68051	119043	79394	205	35.3785	50.3153	29.0335	35.6637	53.4212	46.468	42.4254	24.7027	24.5557	20.8477	62.4235	42.8017	39.3919	44.9365	23.7862	33.3554	25.6471	18.8028	32.8921	21.9369
	206	133352	182037	106931	128768	194122	170358	151150	89631	89726	76162	219415	149809	143177	166903	87295	118004	93657	68051	121305	78441	206	36.8457	50.2976	29.5455	35.5791	53.6367	47.0706	41.7634	24.7654	24.7917	21.0439	60.6253	41.3928	39.5604	46.116	24.12	32.605	25.8778	18.8028	33.5171	21.6736
	207	132695	182093	105988	130166	193972	172562	148089	88044	90452	76985	210142	153721	143863	166832	88080	116055	95298	68463	121331	79905	207	36.6642	50.3131	29.2849	35.9654	53.5953	47.6796	40.9176	24.3269	24.9923	21.2713	58.0631	42.4738	39.7499	46.0964	24.3369	32.0665	26.3312	18.9166	33.5243	22.0781
	208	132398	186792	107685	129879	195473	173155	147052	88824	91153	77455	206904	154112	146362	168076	89095	117517	93288	68900	121447	78682	208	36.5821	51.6114	29.7538	35.8861	54.01	47.8434	40.6311	24.5424	25.186	21.4011	57.1684	42.5818	40.4404	46.4401	24.6173	32.4704	25.7759	19.0374	33.5563	21.7402
	209	137504	186470	108270	131870	199195	173067	151364	89050	90416	78576	204229	154754	143073	165032	91206	119146	95242	69539	119782	81438	209	37.9929	51.5224	29.9155	36.4362	55.0384	47.8191	41.8225	24.6049	24.9823	21.7109	56.4293	42.7592	39.5317	45.599	25.2006	32.9205	26.3158	19.2139	33.0963	22.5017
	210	135702	186758	109311	130843	199729	177506	153218	89792	91052	80232	210142	152995	146171	168663	89550	118562	98513	69684	120087	80159	210	37.495	51.602	30.2031	36.1525	55.186	49.0456	42.3348	24.8099	25.158	22.1684	58.0631	42.2732	40.3877	46.6023	24.743	32.7592	27.2196	19.254	33.1805	22.1483
	211	142427	190831	110905	134184	199358	173304	153051	89080	92440	80075	208387	153885	146396	167424	88980	123242	97356	70665	122082	80814	211	39.3532	52.7274	30.6435	37.0756	55.0834	47.8846	42.2886	24.6132	25.5416	22.1251	57.5782	42.5191	40.4498	46.2599	24.5855	34.0523	26.8999	19.525	33.7318	22.3292
	212	139054	191093	111095	135570	198650	172729	152400	90115	92357	81095	211254	154478	147151	169713	92128	118685	98297	69879	122024	81366	212	38.4212	52.7998	30.696	37.4586	54.8878	47.7257	42.1088	24.8991	25.5186	22.4069	58.3704	42.6829	40.6584	46.8924	25.4553	32.7932	27.1599	19.3079	33.7157	22.4818
	213	145589	192123	112878	134992	202028	173524	150544	90010	93268	81104	215019	156527	147321	170883	92307	119691	96902	70425	122298	80455	213	40.2268	53.0844	31.1887	37.2989	55.8212	47.9454	41.5959	24.8701	25.7703	22.4094	59.4106	43.2491	40.7054	47.2157	25.5048	33.0711	26.7744	19.4587	33.7914	22.2301
	214	141159	193395	113972	133853	201803	174513	151425	90926	91956	81281	218295	157413	148826	169656	93807	118959	102146	70743	121576	81460	214	39.0028	53.4358	31.4909	36.9841	55.759	48.2187	41.8394	25.1232	25.4078	22.4583	60.3158	43.4939	41.1212	46.8767	25.9193	32.8689	28.2234	19.5466	33.592	22.5077
	215	139075	195912	114299	134774	203657	176321	151231	93214	92707	83306	219428	157317	148404	174866	94308	121651	101401	71475	125169	82307	215	38.427	54.1313	31.5813	37.2386	56.2713	48.7182	41.7858	25.7554	25.6153	23.0178	60.6289	43.4673	41.0046	48.3162	26.0577	33.6127	28.0175	19.7488	34.5847	22.7418
	216	138848	196751	114496	137835	200986	176195	155407	93255	91977	83420	220879	157172	152225	173145	93586	122625	101526	71918	122637	81834	216	38.3643	54.3631	31.6357	38.0844	55.5333	48.6834	42.9396	25.7667	25.4136	23.0493	61.0298	43.4273	42.0604	47.8407	25.8582	33.8818	28.0521	19.8712	33.8851	22.6111
	217	142808	197307	117797	138797	201273	181866	157149	95368	93193	83153	220941	157032	154023	172484	94081	122554	104608	72024	123201	81715	217	39.4584	54.5167	32.5478	38.3502	55.6126	50.2503	43.4209	26.3506	25.7496	22.9755	61.0469	43.3886	42.5572	47.658	25.995	33.8622	28.9036	19.9005	34.0409	22.5782
	218	141956	200012	116789	136691	204052	181537	157448	93949	93257	82954	221641	157438	152728	171074	93270	127158	104424	72121	126434	81063	218	39.223	55.2641	32.2693	37.7683	56.3804	50.1594	43.5035	25.9585	25.7673	22.9205	61.2403	43.5008	42.1994	47.2685	25.7709	35.1343	28.8528	19.9273	34.9342	22.398
	219	139779	200442	117445	138088	204601	179694	157063	96317	92927	84827	224026	159647	152374	169044	94051	126945	105402	72518	121471	83509	219	38.6215	55.383	32.4505	38.1543	56.5321	49.6502	43.3972	26.6128	25.6761	23.4381	61.8993	44.1111	42.1016	46.7076	25.9867	35.0754	29.123	20.037	33.5629	23.0739
	220	143096	200443	118309	143009	206071	178122	158954	96785	93568	86276	225456	159508	156255	174652	94198	124252	104332	73114	122721	83248	220	39.538	55.3832	32.6893	39.514	56.9383	49.2158	43.9197	26.7421	25.8532	23.8384	62.2944	44.0727	43.1739	48.2571	26.0273	34.3313	28.8274	20.2017	33.9083	23.0018
	221	142420	202182	120252	143656	206762	177716	156677	99678	93048	85986	228276	163055	154680	170790	94228	124612	108899	73981	123405	84180	221	39.3512	55.8637	33.2261	39.6927	57.1292	49.1037	43.2905	27.5414	25.7095	23.7583	63.0736	45.0528	42.7387	47.19	26.0356	34.4308	30.0892	20.4413	34.0973	23.2593
	222	141383	205581	122970	142045	208179	173986	157457	99438	94039	86891	228102	162161	154873	179684	95949	127875	107286	73653	124602	83320	222	39.0647	56.8029	33.9771	39.2476	57.5207	48.0731	43.506	27.4751	25.9834	24.0083	63.0255	44.8058	42.7921	49.6474	26.5111	35.3324	29.6436	20.3506	34.4281	23.0217
	223	143177	205744	122168	142649	208731	179659	157905	98173	94756	87615	231818	164492	155056	178202	95156	126948	106419	73816	123947	82537	223	39.5604	56.8479	33.7555	39.4145	57.6732	49.6405	43.6298	27.1256	26.1815	24.2084	64.0523	45.4498	42.8426	49.238	26.292	35.0763	29.404	20.3957	34.2471	22.8053
	224	137359	205712	123313	145457	211387	178264	158414	98958	96128	87866	233604	160781	155285	174855	97991	128595	107484	74598	122851	82553	224	37.9529	56.8391	34.0719	40.1904	58.4071	49.2551	43.7704	27.3425	26.5606	24.2777	64.5458	44.4245	42.9059	48.3132	27.0753	35.5313	29.6983	20.6117	33.9442	22.8097
	225	140592	206392	124424	145064	210954	178241	159060	100590	95721	87814	234329	163951	158109	174078	96981	131246	107435	75302	122699	82835	225	38.8462	57.027	34.3789	40.0818	58.2875	49.2487	43.9489	27.7934	26.4481	24.2634	64.7461	45.3003	43.6862	48.0985	26.7963	36.2638	29.6847	20.8063	33.9022	22.8877
	226	138346	209946	123331	146106	212648	180336	159530	101872	95812	88965	234444	164313	156431	175677	97136	131690	108933	75403	122184	83303	226	38.2256	58.009	34.0769	40.3697	58.7555	49.8276	44.0788	28.1477	26.4733	24.5814	64.7779	45.4004	43.2225	48.5403	26.8391	36.3865	30.0986	20.8342	33.7599	23.017
	227	141167	209565	125452	145783	214869	176325	159947	102370	95723	88166	233040	165579	159430	177977	100190	129417	112071	75826	121993	83949	227	39.005	57.9037	34.6629	40.2804	59.3692	48.7193	44.194	28.2853	26.4487	24.3606	64.3899	45.7502	44.0512	49.1758	27.6829	35.7585	30.9657	20.951	33.7072	23.1955
	228	140086	211806	126984	146673	217055	174237	160992	99818	96483	88489	239703	166171	157523	179412	97900	127712	111336	76096	122366	84229	228	38.7063	58.5229	35.0862	40.5264	59.9732	48.1424	44.4828	27.5801	26.6587	24.4499	66.2309	45.9137	43.5243	49.5723	27.0502	35.2874	30.7626	21.0256	33.8102	23.2728
	229	140961	210798	127853	147855	218170	178448	160899	101021	97235	89842	238584	166164	159769	181874	99321	133012	114126	76394	123429	82720	229	38.9481	58.2444	35.3263	40.853	60.2813	49.3059	44.4571	27.9125	26.8664	24.8237	65.9218	45.9118	44.1448	50.2525	27.4428	36.7518	31.5335	21.108	34.1039	22.8559
	230	141985	211960	128543	148916	218452	175306	159310	104689	97862	89404	240014	165886	159582	175832	99028	131334	118981	75562	122453	83746	230	39.231	58.5654	35.517	41.1461	60.3592	48.4378	44.018	28.926	27.0397	24.7027	66.3169	45.835	44.0932	48.5831	27.3618	36.2881	32.8749	20.8781	33.8343	23.1394
	231	144953	215084	130758	149435	218080	177899	160310	106002	99058	90935	239782	163456	159795	177414	98669	128839	119044	76340	120866	84950	231	40.0511	59.4286	36.129	41.2895	60.2564	49.1542	44.2943	29.2888	27.3701	25.1257	66.2528	45.1636	44.152	49.0202	27.2627	35.5988	32.8924	21.0931	33.3958	23.472
	232	142709	213822	131855	150074	223594	179911	160894	103040	98358	90705	240055	166705	162811	180604	102140	133099	118317	77637	121901	83394	232	39.4311	59.0799	36.4321	41.4661	61.78	49.7102	44.4557	28.4704	27.1767	25.0622	66.3282	46.0613	44.9854	49.9016	28.2217	36.7758	32.6915	21.4514	33.6818	23.0421
	233	141830	223705	132923	153084	224155	181780	162259	104183	98529	92057	244187	169214	160349	178804	101239	132379	120132	77947	126696	85218	233	39.1882	61.8106	36.7272	42.2977	61.935	50.2266	44.8328	28.7862	27.224	25.4357	67.4699	46.7545	44.3051	49.4043	27.9728	36.5769	33.193	21.5371	35.0066	23.5461
	234	144160	231219	132787	153243	221492	181070	162241	103723	99745	92532	239454	165304	161051	184524	103462	130674	123685	77977	123414	83948	234	39.832	63.8868	36.6896	42.3417	61.1992	50.0304	44.8279	28.6591	27.56	25.567	66.1621	45.6742	44.4991	50.9847	28.587	36.1058	34.1747	21.5454	34.0998	23.1952
	235	145487	220411	135185	152550	219112	180058	163472	105369	100767	93372	245337	166236	163445	181909	99290	135104	121116	77413	123647	83974	235	40.1987	60.9005	37.3522	42.1502	60.5416	49.7508	45.168	29.1139	27.8423	25.7991	67.7876	45.9317	45.1605	50.2622	27.4342	37.3298	33.4649	21.3895	34.1642	23.2024
	236	142081	219643	135736	154712	222939	180095	164428	105131	99702	94474	249475	171877	165441	186460	101092	131473	123195	78260	123087	83909	236	39.2576	60.6883	37.5044	42.7476	61.599	49.761	45.4321	29.0481	27.5481	26.1036	68.931	47.4903	45.712	51.5197	27.9321	36.3265	34.0393	21.6236	34.0094	23.1844
	237	141268	221057	135803	153787	225779	182032	168222	103787	100969	94144	241227	167101	161692	181347	103649	132371	119588	78219	125193	83841	237	39.0329	61.079	37.5229	42.492	62.3837	50.2962	46.4804	28.6768	27.8982	26.0124	66.652	46.1707	44.6762	50.1069	28.6386	36.5747	33.0427	21.6122	34.5913	23.1656
	238	144803	224065	138036	153045	224526	184784	167145	105578	100251	93579	248053	169233	162096	186476	104894	134771	123447	78286	124341	83523	238	40.0097	61.9101	38.1399	42.287	62.0375	51.0566	46.1829	29.1716	27.6998	25.8563	68.5381	46.7598	44.7878	51.5241	28.9826	37.2378	34.1089	21.6307	34.3559	23.0778
	239	146273	224550	137665	155993	225456	182311	168842	104440	101762	95704	243721	173065	159620	182729	103145	133640	119189	79170	122837	87564	239	40.4158	62.0441	38.0374	43.1015	62.2944	50.3733	46.6517	28.8572	28.1173	26.4434	67.3411	47.8186	44.1037	50.4888	28.4994	36.9253	32.9324	21.875	33.9404	24.1943
	240	147150	232717	138961	155407	229613	181330	170823	102170	101521	96653	244974	174105	160218	185093	103481	136864	117816	79018	122623	86207	240	40.6582	64.3007	38.3955	42.9396	63.443	50.1022	47.1991	28.23	28.0507	26.7056	67.6873	48.1059	44.2689	51.142	28.5922	37.8161	32.5531	21.833	33.8812	23.8194
	241	152665	223892	140634	156410	230066	185564	172468	103279	101960	97219	244927	171515	162609	189845	103043	135340	120287	80238	124724	90880	241	42.182	61.8623	38.8578	43.2167	63.5682	51.2721	47.6536	28.5364	28.172	26.862	67.6743	47.3903	44.9295	52.455	28.4712	37.395	33.2358	22.1701	34.4618	25.1105
	242	155270	227468	142514	157148	229979	184075	169484	103001	103346	97671	251074	172146	164109	186331	104567	136968	123890	80165	123168	86587	242	42.9017	62.8504	39.3772	43.4206	63.5442	50.8607	46.8291	28.4596	28.5549	26.9869	69.3728	47.5647	45.344	51.484	28.8923	37.8448	34.2313	22.1499	34.0318	23.9243
	243	157159	229620	143916	157864	229583	186091	169382	101042	104488	96769	246124	174428	162570	183535	104878	137372	125208	80289	125488	86936	243	43.4237	63.445	39.7646	43.6185	63.4347	51.4177	46.801	27.9183	28.8705	26.7377	68.0051	48.1952	44.9188	50.7115	28.9782	37.9565	34.5955	22.1842	34.6729	24.0208
	244	158784	230120	144766	159238	233682	187376	170931	101100	105270	97439	250578	173475	164449	184137	104560	137760	122480	80377	125570	86559	244	43.8727	63.5831	39.9994	43.9981	64.5673	51.7728	47.2289	27.9344	29.0865	26.9228	69.2357	47.9319	45.4379	50.8778	28.8904	38.0637	33.8417	22.2085	34.6955	23.9166
	245	154934	228537	147553	159022	233743	184982	171431	101586	106010	101153	250445	173417	165977	182740	106089	136875	125749	80806	123767	86900	245	42.8089	63.1457	40.7695	43.9384	64.5842	51.1113	47.3671	28.0686	29.291	27.949	69.199	47.9158	45.8601	50.4918	29.3128	37.8191	34.745	22.327	34.1973	24.0108
	246	158676	229046	145968	158902	233898	184384	174009	102154	106639	98813	249131	177211	163033	184692	107469	137244	123881	80831	125309	86489	246	43.8428	63.2864	40.3316	43.9053	64.627	50.9461	48.0794	28.2256	29.4648	27.3024	68.8359	48.9641	45.0467	51.0312	29.6941	37.9211	34.2288	22.3339	34.6234	23.8973
	247	156908	232697	145730	160827	240641	184196	172862	100778	106250	100826	256348	176457	162028	182284	107298	138346	122051	80653	124963	86546	247	43.3543	64.2951	40.2658	44.4372	66.4901	50.8941	47.7625	27.8454	29.3573	27.8586	70.83	48.7558	44.769	50.3658	29.6469	38.2256	33.7232	22.2848	34.5278	23.913
	248	153937	234940	149039	160404	236868	182601	173978	100577	106551	101185	246602	182619	166798	195003	107237	139828	117747	81380	123392	87201	248	42.5334	64.9149	41.1801	44.3203	65.4476	50.4534	48.0708	27.7898	29.4405	27.9578	68.1372	50.4584	46.087	53.8801	29.63	38.6351	32.534	22.4856	34.0937	24.094
	249	153349	235047	147102	162423	238833	188540	174575	102395	107368	102139	246866	177857	163359	183784	108680	137586	126332	82062	123609	87312	249	42.371	64.9445	40.6449	44.8781	65.9906	52.0944	48.2358	28.2922	29.6662	28.2214	68.2101	49.1426	45.1368	50.7803	30.0287	38.0156	34.9061	22.6741	34.1537	24.1247
	250	156293	236596	149328	162227	264210	187593	175850	103744	108449	103132	250937	180317	165412	185455	109788	140569	129755	81725	123121	86674	250	43.1844	65.3725	41.2599	44.824	73.0023	51.8327	48.5881	28.6649	29.9649	28.4958	69.3349	49.8223	45.704	51.242	30.3349	38.8398	35.8518	22.581	34.0188	23.9484
	251	153675	236160	149068	166155	236644	186995	177770	101412	108698	103207	253876	179225	167666	185820	111023	142904	125080	82302	126243	87742	251	42.461	65.252	41.1881	45.9093	65.3857	51.6675	49.1186	28.0206	30.0337	28.5165	70.147	49.5206	46.3268	51.3428	30.6761	39.485	34.5601	22.7404	34.8815	24.2435
	252	157542	239891	150766	163930	238553	188091	178266	102871	109062	103259	254693	179009	169341	188065	111194	138645	125620	82557	125843	86909	252	43.5295	66.2829	41.6573	45.2945	65.9132	51.9703	49.2556	28.4237	30.1343	28.5309	70.3727	49.4609	46.7896	51.9631	30.7234	38.3082	34.7093	22.8108	34.7709	24.0133
	253	156176	238514	154257	167349	239988	188198	178313	104489	109259	103412	257669	179735	170706	191665	113515	141753	128773	82079	125930	87478	253	43.1521	65.9024	42.6219	46.2392	66.3097	51.9999	49.2686	28.8707	30.1887	28.5732	71.195	49.6615	47.1668	52.9578	31.3647	39.1669	35.5805	22.6788	34.795	24.1705
	254	157542	237284	156624	169302	242279	186548	177707	105598	109857	104440	260393	175514	171882	200698	113814	140031	128791	82870	126895	87601	254	43.5295	65.5626	43.2759	46.7788	66.9427	51.544	49.1012	29.1772	30.3539	28.8572	71.9477	48.4952	47.4917	55.4537	31.4473	38.6911	35.5855	22.8973	35.0616	24.2045
	255	162892	240881	161158	166109	242845	194162	180889	108800	108823	104838	258610	182172	174352	198644	114652	140485	125916	83731	126151	87768	255	45.0077	66.5564	44.5286	45.8966	67.0991	53.6478	49.9804	30.0619	30.0682	28.9672	71.455	50.3349	48.1742	54.8862	31.6788	38.8166	34.7911	23.1352	34.856	24.2507
	256	166994	240023	159031	167209	244959	193261	181573	106675	109056	106456	258363	179955	169121	201750	114901	140417	127563	83118	127357	87963	256	46.1411	66.3194	43.9409	46.2005	67.6832	53.3988	50.1694	29.4747	30.1326	29.4142	71.3868	49.7223	46.7288	55.7444	31.7476	38.7978	35.2462	22.9658	35.1893	24.3045
	257	166002	242481	158125	167077	248639	190716	181314	108166	110019	106999	263169	185774	176133	203316	114087	143285	128260	83819	126776	87765	257	45.867	66.9985	43.6906	46.1641	68.7	52.6956	50.0978	29.8867	30.3987	29.5643	72.7147	51.3301	48.6663	56.1771	31.5227	39.5902	35.4388	23.1595	35.0287	24.2498
	258	164959	241666	161095	168164	248070	191680	183436	108294	111702	106828	256027	182539	173124	205227	116707	144984	128448	83516	127336	87177	258	45.5789	66.7733	44.5112	46.4644	68.5428	52.962	50.6841	29.9221	30.8637	29.517	70.7413	50.4363	47.8349	56.7051	32.2466	40.0597	35.4907	23.0758	35.1835	24.0874
	259	165155	244860	161669	167740	246428	187885	184717	110826	110389	108157	255099	179764	175006	213028	114641	144290	126282	84579	126420	88614	259	45.633	67.6558	44.6698	46.3473	68.0891	51.9134	51.0381	30.6217	30.5009	29.8842	70.4849	49.6695	48.3549	58.8605	31.6758	39.8679	34.8922	23.3695	34.9304	24.4844
	260	161074	246013	161889	170131	248283	188916	184681	111704	111523	109498	262177	183069	179461	206970	116929	143687	130432	84571	126853	88668	260	44.5054	67.9744	44.7306	47.0079	68.6016	52.1983	51.0281	30.8643	30.8143	30.2548	72.4406	50.5827	49.5858	57.1867	32.308	39.7013	36.0389	23.3673	35.05	24.4993
	261	165542	244017	162881	169167	246472	191258	185218	112740	111532	109051	257784	183139	182832	206542	118529	149396	126168	84779	126757	89492	261	45.7399	67.4229	45.0047	46.7415	68.1012	52.8454	51.1765	31.1505	30.8168	30.1312	71.2268	50.6021	50.5172	57.0684	32.7501	41.2787	34.8607	23.4248	35.0235	24.727
	262	164440	244174	162955	172444	249552	189120	184936	110850	113059	110133	264607	185173	177881	214944	118551	147387	135817	84776	129302	87100	262	45.4355	67.4663	45.0251	47.647	68.9523	52.2546	51.0986	30.6283	31.2387	30.4302	73.112	51.1641	49.1493	59.3899	32.7561	40.7236	37.5268	23.424	35.7267	24.0661
	263	167173	245692	164396	171471	250632	194345	185560	113007	113136	111074	267026	184924	180368	216319	117337	147798	134909	85303	126207	88298	263	46.1906	67.8857	45.4233	47.3781	69.2507	53.6983	51.271	31.2243	31.2599	30.6902	73.7804	51.0953	49.8364	59.7698	32.4207	40.8372	37.2759	23.5696	34.8715	24.3971
	264	167711	246890	164887	172550	254229	191615	186124	114720	112630	111449	266031	183371	185272	219963	118733	147425	132907	85108	126914	90426	264	46.3392	68.2167	45.559	47.6763	70.2445	52.944	51.4268	31.6976	31.1201	30.7938	73.5055	50.6662	51.1914	60.7767	32.8064	40.7341	36.7228	23.5157	35.0669	24.9851
	265	171150	246715	166973	176205	254603	192009	184433	114327	113073	111981	264337	184188	183454	215787	117139	151083	130942	85114	125538	90486	265	47.2895	68.1684	46.1353	48.6862	70.3479	53.0529	50.9596	31.589	31.2425	30.9408	73.0374	50.8919	50.6891	59.6228	32.366	41.7449	36.1798	23.5174	34.6867	25.0017
	266	167004	246084	168286	173992	258495	193557	185980	114947	112557	111499	263865	180222	186819	220778	116303	147224	133897	86309	125547	90737	266	46.1439	67.994	46.4981	48.0747	71.4232	53.4806	51.387	31.7603	31.1	30.8076	72.907	49.7961	51.6189	61.0019	32.135	40.6786	36.9963	23.8475	34.6892	25.071
	267	161158	248538	167057	174787	259370	194106	188384	114712	114025	112327	264162	184256	183706	216731	118458	150278	136063	85603	128483	90424	267	44.5286	68.6721	46.1585	48.2944	71.665	53.6323	52.0513	31.6954	31.5056	31.0364	72.9891	50.9107	50.7587	59.8837	32.7304	41.5224	37.5948	23.6525	35.5004	24.9845
	268	158848	250629	167760	175529	259036	191133	189643	115266	113349	113955	271495	187542	183378	217909	123036	148593	134616	85474	129068	89658	268	43.8904	69.2498	46.3528	48.4994	71.5727	52.8108	52.3991	31.8485	31.3188	31.4862	75.0152	51.8186	50.6681	60.2092	33.9954	41.0569	37.195	23.6168	35.662	24.7729
	269	157694	250133	169397	176047	256076	194181	189704	117253	113168	113182	274175	186392	180788	221531	120501	150927	137843	86622	127256	91020	269	43.5715	69.1128	46.8051	48.6425	70.7549	53.653	52.416	32.3975	31.2688	31.2727	75.7557	51.5009	49.9525	61.2099	33.2949	41.7018	38.0866	23.934	35.1614	25.1492
	270	164974	251658	171487	175860	258080	196383	188147	116481	112955	115397	272329	190382	181441	221659	121760	150122	140711	85896	128013	89826	270	45.583	69.5342	47.3826	48.5908	71.3086	54.2614	51.9858	32.1842	31.2099	31.8847	75.2456	52.6033	50.1329	61.2453	33.6428	41.4793	38.879	23.7334	35.3705	24.8193
	271	170867	251179	173375	176487	259795	195696	191137	119559	113130	116299	266639	190335	181445	221389	121276	148874	141862	86011	127753	90288	271	47.2113	69.4018	47.9042	48.7641	71.7824	54.0716	52.8119	33.0346	31.2583	32.1339	73.6735	52.5904	50.134	61.1707	33.5091	41.1345	39.1971	23.7652	35.2987	24.9469
	272	164775	253082	171285	177556	277888	200573	191791	120628	113136	117164	272400	190893	185166	220665	124359	145623	140566	86104	128455	91208	272	45.528	69.9276	47.3268	49.0595	76.7816	55.4192	52.9927	33.33	31.2599	32.3729	75.2653	52.7445	51.1621	60.9707	34.3609	40.2362	38.839	23.7909	35.4927	25.2011
	273	166662	252299	174114	180648	261505	195957	193218	121077	113591	117541	266709	189748	189677	221187	121237	153653	143984	86996	127101	90177	273	46.0494	69.7113	48.1084	49.9138	72.2549	54.1437	53.3869	33.4541	31.3857	32.4771	73.6928	52.4282	52.4085	61.1149	33.4983	42.455	39.7834	24.0374	35.1185	24.9163
	274	163913	252502	172691	177396	261576	196698	192616	121190	114356	117376	264453	189724	187253	218873	121959	150566	139335	86578	127526	90851	274	45.2898	69.7674	47.7152	49.0153	72.2745	54.3485	53.2206	33.4853	31.597	32.4315	73.0695	52.4215	51.7388	60.4755	33.6978	41.602	38.4988	23.9219	35.236	25.1025
	275	171631	253222	175258	179385	265859	200312	190573	121337	114274	117292	264819	188462	187057	217836	123593	148886	142949	86843	125624	91062	275	47.4224	69.9663	48.4245	49.5648	73.4579	55.347	52.6561	33.5259	31.5744	32.4083	73.1706	52.0728	51.6846	60.189	34.1493	41.1378	39.4974	23.9951	34.7104	25.1608
	276	168762	255285	172073	178005	269966	193002	190406	122438	113537	117564	269159	190211	188914	215242	121959	150477	140649	86712	127205	90374	276	46.6296	70.5363	47.5445	49.1835	74.5927	53.3273	52.61	33.8301	31.3707	32.4834	74.3698	52.5561	52.1977	59.4723	33.6978	41.5774	38.8619	23.9589	35.1473	24.9707
	277	173942	259233	176261	179919	265755	198278	192805	123623	114713	117610	264407	189539	191421	216213	123774	147441	142934	88074	127774	90394	277	48.0609	71.6272	48.7016	49.7124	73.4292	54.785	53.2728	34.1575	31.6957	32.4961	73.0568	52.3704	52.8904	59.7406	34.1993	40.7386	39.4933	24.3352	35.3045	24.9762
	278	172002	257055	174672	179734	268247	201490	195601	126589	115556	118532	262968	195719	188021	213115	124064	148713	143065	87301	127963	92909	278	47.5249	71.0254	48.2626	49.6613	74.1178	55.6725	54.0454	34.9771	31.9286	32.7509	72.6592	54.078	51.951	58.8846	34.2794	41.09	39.5295	24.1216	35.3567	25.6711
	279	178242	257616	173784	180774	267889	200538	194351	123318	116271	120088	263230	198285	191057	213808	124567	152334	142444	86969	128377	91905	279	49.249	71.1804	48.0172	49.9486	74.0188	55.4095	53.7	34.0733	32.1262	33.1808	72.7315	54.787	52.7898	59.076	34.4184	42.0905	39.3579	24.0299	35.4711	25.3937
	280	164671	254577	174411	183043	270133	202179	195510	123775	117149	119707	269693	194228	187177	220051	124796	153622	145427	87942	128989	90546	280	45.4993	70.3407	48.1905	50.5755	74.6389	55.8629	54.0202	34.1995	32.3688	33.0755	74.5173	53.666	51.7178	60.801	34.4817	42.4464	40.1821	24.2987	35.6402	25.0182
	281	169371	257707	176294	183334	269978	199475	195245	125706	116966	120444	268009	193026	189555	226350	124162	150033	147770	87935	129229	91443	281	46.7979	71.2055	48.7108	50.6559	74.596	55.1158	53.947	34.7331	32.3182	33.2792	74.052	53.3339	52.3748	62.5414	34.3065	41.4547	40.8295	24.2968	35.7065	25.2661
	282	174582	260411	175432	184782	272708	198605	196090	128187	117525	119990	266935	189110	190837	230411	126224	152136	149086	88483	129630	91425	282	48.2377	71.9526	48.4726	51.056	75.3504	54.8754	54.1805	35.4186	32.4726	33.1537	73.7552	52.2519	52.7291	63.6635	34.8762	42.0358	41.1931	24.4482	35.8173	25.2611
	283	172460	260152	177764	186884	271491	203905	198619	126401	117216	120886	270665	193831	190304	237091	126196	156085	151372	88632	128369	91818	283	47.6514	71.8811	49.1169	51.6368	75.0141	56.3398	54.8793	34.9251	32.3873	33.4013	74.7859	53.5563	52.5818	65.5092	34.8685	43.1269	41.8247	24.4894	35.4689	25.3697
	284	184806	262272	178054	184638	277024	205599	195860	128166	119153	123170	265927	196593	191329	246363	125318	151557	154598	88695	130152	91500	284	51.0627	72.4668	49.1971	51.0162	76.5429	56.8079	54.1169	35.4128	32.9225	34.0324	73.4767	54.3195	52.865	68.0711	34.6259	41.8758	42.7161	24.5068	35.9615	25.2818
	285	177655	264308	178741	186319	274773	202994	196621	127328	118637	123209	275030	195428	190269	251926	126025	148518	149704	89089	129309	92616	285	49.0868	73.0294	49.3869	51.4807	75.9209	56.0881	54.3272	35.1813	32.7799	34.0432	75.9919	53.9976	52.5721	69.6082	34.8212	41.0361	41.3638	24.6157	35.7286	25.5902
	286	180368	264393	180559	188818	273167	203722	197355	128418	118670	125787	275324	193264	196594	249249	129193	152977	151630	88642	128924	92136	286	49.8364	73.0529	49.8892	52.1712	75.4772	56.2892	54.53	35.4824	32.789	34.7555	76.0732	53.3996	54.3197	68.8685	35.6966	42.2682	41.896	24.4922	35.6222	25.4576
	287	180065	264785	178518	188047	273907	201170	199002	126557	118261	129624	274094	195051	192247	238012	127580	149602	150050	89163	131460	91001	287	49.7527	73.1612	49.3253	51.9582	75.6816	55.5841	54.9851	34.9682	32.676	35.8156	75.7333	53.8934	53.1186	65.7637	35.2509	41.3357	41.4594	24.6361	36.3229	25.144
	288	185029	273203	182544	189190	276268	197362	203468	129688	119517	125207	271034	193028	195208	234551	127491	244965	150517	88896	128228	91672	288	51.1243	75.4871	50.4377	52.274	76.334	54.5319	56.2191	35.8333	33.023	34.5952	74.8878	53.3344	53.9368	64.8074	35.2263	67.6848	41.5885	24.5623	35.4299	25.3294
	289	176968	258640	183188	191001	275646	201956	203665	130597	120425	139223	269542	196978	197608	233321	128581	172426	153622	89747	131888	91643	289	48.897	71.4633	50.6156	52.7744	76.1621	55.8013	56.2735	36.0845	33.2739	38.4679	74.4756	54.4258	54.5999	64.4676	35.5275	47.642	42.4464	24.7975	36.4412	25.3213
	290	184939	259016	183586	190886	276060	200693	205083	130727	119423	140451	276257	200446	202499	223632	130830	146634	150091	89893	131524	91466	290	51.0994	71.5672	50.7256	52.7426	76.2765	55.4523	56.6653	36.1204	32.9971	38.8072	76.331	55.3841	55.9513	61.7905	36.1489	40.5156	41.4708	24.8378	36.3406	25.2724
	291	182593	264288	184198	189751	279272	202977	201605	131720	120564	146307	278247	204316	201912	220391	129779	156963	157396	90020	132013	91793	291	50.4512	73.0239	50.8947	52.429	77.164	56.0834	55.7043	36.3948	33.3123	40.4252	76.8808	56.4534	55.7891	60.8949	35.8585	43.3695	43.4892	24.8729	36.4757	25.3628
	292	179489	262495	186721	188704	277119	201164	201285	130267	121393	149230	277685	204540	206735	223514	132304	159145	153623	90374	132140	91724	292	49.5936	72.5285	51.5918	52.1397	76.5691	55.5824	55.6159	35.9933	33.5414	41.2329	76.7255	56.5153	57.1217	61.7578	36.5561	43.9724	42.4467	24.9707	36.5108	25.3437
	293	179566	265949	188604	188719	280674	202974	201976	132692	122099	133696	277887	198075	213089	224454	130874	153932	153104	90226	132817	92573	293	49.6148	73.4828	52.1121	52.1438	77.5514	56.0826	55.8068	36.6634	33.7365	36.9408	76.7813	54.7289	58.8774	62.0176	36.161	42.5321	42.3033	24.9298	36.6979	25.5783
	294	181079	262656	188206	190053	283167	201320	201803	130926	122253	125598	274740	200688	215559	219675	131832	155119	155576	91478	132410	91223	294	50.0329	72.5729	52.0021	52.5124	78.2402	55.6256	55.759	36.1754	33.779	34.7032	75.9118	55.4509	59.5598	60.6971	36.4257	42.86	42.9863	25.2758	36.5854	25.2053
	295	174819	264163	188981	189498	283614	198729	203113	130446	122309	126339	278536	197813	221564	217249	131281	155395	150289	89897	130867	92881	295	48.3032	72.9893	52.2162	52.3591	78.3637	54.9096	56.121	36.0428	33.7945	34.908	76.9607	54.6566	61.2191	60.0268	36.2735	42.9363	41.5255	24.8389	36.1591	25.6634
	296	176625	262955	188358	191245	282516	198346	205853	133627	123609	126522	274964	200859	225987	214543	135040	159084	158078	90215	130313	92271	296	48.8022	72.6556	52.0441	52.8418	78.0603	54.8038	56.878	36.9217	34.1537	34.9586	75.9737	55.4982	62.4411	59.2791	37.3121	43.9556	43.6776	24.9268	36.006	25.4949
	297	172214	261612	193286	191254	285198	197918	205165	135852	123124	126868	275315	201881	234034	217758	134649	156811	156236	90866	132544	91947	297	47.5834	72.2845	53.4057	52.8443	78.8014	54.6856	56.6879	37.5365	34.0197	35.0542	76.0707	55.7806	64.6646	60.1674	37.2041	43.3275	43.1687	25.1067	36.6225	25.4053
	298	174621	266184	191242	191870	285441	202955	210455	135048	124147		276286	203719	238685	223044	135247	157321	157407	91411	130568	94325	298	48.2485	73.5477	52.841	53.0145	78.8685	56.0773	58.1496	37.3143	34.3023	0	76.339	56.2884	65.9497	61.628	37.3693	43.4684	43.4922	25.2572	36.0765	26.0624
	299	174995	264423	192628	193318	286134	204559	208827	135339	122358		281388	202471	241600	225754	136143	156835	160964	91437	131510	93513	299	48.3518	73.0612	53.2239	53.4146	79.06	56.5205	57.6998	37.3947	33.808	0	77.7487	55.9436	66.7551	62.3768	37.6169	43.3342	44.475	25.2644	36.3368	25.838
	300	181105	264708	195772	194089	287100	202380	209326	133043	123553		281077	203681	238286	216782	137846	158123	162173	91340	133732	92827	300	50.0401	73.1399	54.0926	53.6276	79.3269	55.9184	57.8376	36.7603	34.1382	0	77.6627	56.2779	65.8394	59.8978	38.0874	43.69	44.8091	25.2376	36.9507	25.6485
	301	180367	264074	194848	193863	291378	203625	207284	135624	124107		283090	206711	247844	219129	136426	161340	161779	91769	133008	92546	301	49.8362	72.9647	53.8373	53.5652	80.509	56.2624	57.2734	37.4735	34.2913	0	78.2189	57.1151	68.4803	60.5463	37.6951	44.5789	44.7002	25.3562	36.7507	25.5708
	302	175561	267421	193656	193817	289534	206392	209936	139575	125051		284702	206069	241375	219232	137712	161575	162572	92179	132100	92314	302	48.5082	73.8895	53.508	53.5524	79.9994	57.027	58.0062	38.5652	34.5521	0	78.6643	56.9377	66.6929	60.5747	38.0504	44.6438	44.9193	25.4694	36.4998	25.5067
	303	173861	263853	198831	199835	291860	208736	209990	140158	125860		283274	205775	247016	218266	140770	163437	160240	92699	133814	93251	303	48.0385	72.9037	54.9378	55.2152	80.6421	57.6746	58.0211	38.7262	34.7756	0	78.2698	56.8565	68.2515	60.3078	38.8953	45.1583	44.275	25.6131	36.9734	25.7656
	304	178510	268951	197029	200493	289029	213174	211271	137935	124206		280025	208535	247226	219359	136046	171543	162043	92115	133224	93313	304	49.3231	74.3123	54.4399	55.397	79.8599	58.9009	58.3751	38.112	34.3186	0	77.3721	57.6191	68.3096	60.6098	37.5901	47.398	44.7732	25.4518	36.8103	25.7828
	305	179366	270287	201131	199731	291607	207580	212870	140964	125668		276636	204485	245158	219447	140900	161051	160831	93048	133228	93930	305	49.5596	74.6814	55.5733	55.1865	80.5722	57.3552	58.8169	38.9489	34.7226	0	76.4357	56.5001	67.7382	60.6341	38.9313	44.4991	44.4383	25.7095	36.8115	25.9532
	306	183391	267052	200141	200945	292632	211963	214677	138560	126307		278111	208745	238227	218221	136129	167527	164030	92424	134392	93217	306	50.6717	73.7876	55.2998	55.5219	80.8554	58.5663	59.3161	38.2847	34.8991	0	76.8432	57.6771	65.8231	60.2954	37.613	46.2884	45.3222	25.5371	37.1331	25.7562
	307	183200	267549	200259	200862	292513	209444	214670	139292	125523		277929	203509	248177	216796	140792	164648	165756	92843	132106	93380	307	50.6189	73.9249	55.3324	55.499	80.8226	57.8702	59.3142	38.487	34.6825	0	76.7929	56.2304	68.5723	59.9016	38.9014	45.4929	45.7991	25.6529	36.5014	25.8013
	308	178655	268470	201140	205020	294713	211419	214675	141440	126177		287081	208371	248675	216771	142025	164707	167852	93834	134618	94649	308	49.3631	74.1794	55.5758	56.6479	81.4304	58.4159	59.3156	39.0805	34.8632	0	79.3217	57.5738	68.7099	59.8947	39.2421	45.5092	46.3782	25.9267	37.1955	26.1519
	309	178995	271167	200671	204040	296584	205481	217221	141447	126613		278642	208399	242578	223649	142291	173638	163696	92865	133427	93991	309	49.4571	74.9246	55.4462	56.3771	81.9474	56.7753	60.0191	39.0824	34.9837	0	76.9899	57.5815	67.0253	61.7951	39.3156	47.9769	45.2299	25.659	36.8664	25.9701
	310	175277	270577	198484	207690	296328	207062	217036	141925	126429		285690	210555	229526	221420	140153	170023	167070	93842	134713	92456	310	48.4298	74.7615	54.842	57.3856	81.8767	57.2121	59.9679	39.2145	34.9329	0	78.9373	58.1772	63.419	61.1793	38.7249	46.9781	46.1621	25.9289	37.2218	25.546
	311	175287	273266	200090	203901	296012	205422	215221	140198	126043		286040	215449	234618	229226	140098	170009	172200	93658	135821	93842	311	48.4325	75.5045	55.2857	56.3387	81.7893	56.759	59.4665	38.7373	34.8262	0	79.034	59.5295	64.8259	63.3361	38.7097	46.9742	47.5796	25.8781	37.5279	25.9289
	312	177260	269903	198763	206952	297816	209618	215957	143254	127106		277139	211529	225588	220088	140337	171331	166620	93472	134561	94561	312	48.9777	74.5753	54.919	57.1817	82.2878	57.9183	59.6698	39.5817	35.1199	0	76.5747	58.4463	62.3309	60.8112	38.7757	47.3395	46.0378	25.8267	37.1798	26.1276
	313	175182	267444	198977	205970	296283	208792	217012	143410	128119		278017	212417	215781	221999	142892	174419	170950	94551	133945	94669	313	48.4035	73.8959	54.9782	56.9104	81.8642	57.6901	59.9613	39.6248	35.3998	0	76.8173	58.6917	59.6212	61.3392	39.4817	48.1927	47.2342	26.1248	37.0096	26.1574
	314	169047	270871	201409	206685	297276	212557	221215	145931	127842		286469	204678	210531	220563	140090	177515	175386	94241	134555	93630	314	46.7084	74.8428	55.6501	57.1079	82.1386	58.7304	61.1226	40.3213	35.3233	0	79.1526	56.5534	58.1706	60.9425	38.7074	49.0481	48.4599	26.0392	37.1781	25.8704
	315	175999	269232	204298	205998	299835	209445	222860	146673	128345		299752	215378	205576	226669	141072	178729	164494	94849	135105	94509	315	48.6293	74.3899	56.4484	56.9181	82.8457	57.8705	61.5771	40.5264	35.4623	0	82.8227	59.5098	56.8015	62.6296	38.9788	49.3836	45.4504	26.2072	37.3301	26.1132
	316	184849	268028	206398	206286	300859	214311	222999	146509	127210		293331	213444	210752	226667	142410	186059	169017	94235	135063	92835	316	51.0745	74.0573	57.0286	56.9977	83.1286	59.215	61.6156	40.481	35.1487	0	81.0486	58.9755	58.2317	62.629	39.3485	51.4089	46.7001	26.0375	37.3185	25.6507
	317	186028	270654	203257	206426	303776	212963	220751	146617	127804		282021	213316	208969	222552	142754	181723	177372	94383	134141	95329	317	51.4003	74.7828	56.1608	57.0364	83.9346	58.8426	60.9944	40.5109	35.3128	0	77.9236	58.9401	57.739	61.492	39.4435	50.2108	49.0086	26.0784	37.0637	26.3398
	318	182170	271595	204723	209162	303315	209932	220921	148289	126882		280376	216709	202534	218052	144122	181179	171470	94845	134275	94162	318	50.3343	75.0428	56.5658	57.7923	83.8072	58.0051	61.0414	40.9729	35.058	0	77.4691	59.8776	55.961	60.2487	39.8215	50.0605	47.3779	26.2061	37.1007	26.0174
	319	175844	273343	206931	210061	304786	213194	222283	148964	128390		278504	218069	204420	227387	142633	185922	176815	94845	135067	94840	319	48.5864	75.5258	57.1759	58.0407	84.2136	58.9064	61.4177	41.1594	35.4747	0	76.9518	60.2534	56.4821	62.828	39.4101	51.371	48.8547	26.2061	37.3196	26.2047
	320	178740	276203	207656	212113	283933	216606	219815	151007	128340		285102	219216	203503	220061	146940	180193	169166	94931	133439	95336	320	49.3866	76.316	57.3762	58.6077	78.4519	59.8491	60.7358	41.7239	35.4609	0	78.7749	60.5703	56.2287	60.8038	40.6001	49.7881	46.7413	26.2298	36.8698	26.3417
	321	183811	274716	212525	210798	277856	212095	220557	149504	129640		278763	216362	210846	226499	147088	177679	174955	95580	134395	94717	321	50.7877	75.9052	58.7215	58.2444	76.7728	58.6027	60.9408	41.3086	35.8201	0	77.0234	59.7817	58.2576	62.5826	40.641	49.0934	48.3408	26.4092	37.1339	26.1707
	322	181447	272535	215053	209845	268405	218294	224853	147557	129380		278662	213853	211314	223811	145857	177880	174098	95211	134273	94954	322	50.1346	75.3026	59.42	57.981	74.1614	60.3155	62.1278	40.7706	35.7482	0	76.9955	59.0885	58.3869	61.8399	40.3009	49.149	48.104	26.3072	37.1002	26.2362
	323	181246	273632	211536	209127	263283	216926	227365	150324	129236		278148	214971	202427	223537	148765	178727	172717	95781	133195	95973	323	50.079	75.6057	58.4483	57.7827	72.7462	59.9376	62.8219	41.5351	35.7084	0	76.8534	59.3974	55.9314	61.7642	41.1044	49.383	47.7224	26.4647	36.8023	26.5177
	324	178277	272700	213240	209974	252870	211497	229384	156153	129283		279084	226417	207989	223767	148014	179471	174622	95708	134710	96390	324	49.2587	75.3481	58.9191	58.0167	69.869	58.4375	63.3798	43.1457	35.7214	0	77.1121	62.56	57.4682	61.8278	40.8969	49.5886	48.2488	26.4445	37.2209	26.633
	325	180616	273991	214584	211727		213262	230755	157971	130816		291354	219607	207928	224096	149395	180173	174682	96792	133928	95759	325	49.905	75.7049	59.2905	58.501	0	58.9252	63.7586	43.648	36.145	0	80.5023	60.6783	57.4514	61.9187	41.2785	49.7825	48.2654	26.744	37.0049	26.4586
	326	181839	273631	216786	217013		212439	231030	159498	131915		282643	212077	206040	217412	152278	180841	172375	95332	133883	95408	326	50.2429	75.6054	59.8989	59.9616	0	58.6978	63.8345	44.07	36.4487	0	78.0954	58.5978	56.9297	60.0718	42.075	49.9671	47.6279	26.3406	36.9924	26.3616
	327	185880	276263	219172	215633		212956	231684	155062	131474		281969	221741	211171	217559	150949	179165	165268	96297	135893	95257	327	51.3594	76.3326	60.5581	59.5803	0	58.8406	64.0153	42.8443	36.3268	0	77.9092	61.268	58.3474	60.1125	41.7078	49.504	45.6642	26.6073	37.5478	26.3199
	328	185008	276069	220865	212393		208679	231559	153489	131946		287785	217815	212530	223976	151320	182130	174645	95804	134110	95621	328	51.1185	76.279	61.0259	58.6851	0	57.6589	63.9807	42.4096	36.4572	0	79.5162	60.1832	58.7229	61.8855	41.8103	50.3233	48.2551	26.471	37.0552	26.4205
	329	179861	273527	220102	215192		214976	229649	157023	131966		285785	214590	209639	224646	151090	181057	179763	96860	133713	96656	329	49.6963	75.5766	60.8151	59.4584	0	59.3988	63.453	43.3861	36.4628	0	78.9636	59.2921	57.9241	62.0706	41.7468	50.0268	49.6693	26.7628	36.9455	26.7065
	330	179814	275003	221493	212833		209367	230459	159271	131982		286675	211813	215984	220400	154574	185324	177734	97477	134265	96912	330	49.6834	75.9845	61.1994	58.8066	0	57.849	63.6768	44.0072	36.4672	0	79.2095	58.5248	59.6773	60.8974	42.7094	51.2058	49.1086	26.9333	37.098	26.7772
	331	187476	277185	222067	216046		212176	229995	157297	132845		282146	221225	217046	221810	153767	177468	182440	98267	136601	96317	331	51.8004	76.5874	61.358	59.6944	0	58.6251	63.5486	43.4618	36.7056	0	77.9581	61.1254	59.9707	61.287	42.4865	49.0351	50.4089	27.1516	37.7434	26.6128
	332	185641	273999	225530	214890		212724	230611	161217	132645		289138	217199	221460	219660	152218	178445	183101	97743	137283	96701	332	51.2934	75.7071	62.3149	59.375	0	58.7765	63.7188	44.5449	36.6504	0	79.89	60.013	61.1903	60.693	42.0585	49.3051	50.5916	27.0068	37.9319	26.7189
	333	188246	277937	229421	214395		211834	230962	160443	133642		287199	220896	219828	219432	153397	186813	182209	98306	134723	96461	333	52.0132	76.7951	63.39	59.2382	0	58.5306	63.8158	44.3311	36.9258	0	79.3543	61.0345	60.7394	60.63	42.3842	51.6172	50.3451	27.1624	37.2245	26.6526
	334	178745	275041	227660	215069		215592	229052	161198	133364		287548	221938	224449	210221	152133	182876	189798	98370	138455	95806	334	49.388	75.995	62.9034	59.4245	0	59.569	63.288	44.5397	36.849	0	79.4507	61.3224	62.0162	58.0849	42.035	50.5294	52.442	27.18	38.2557	26.4716
	335	188658	280263	230623	217218		215337	232718	161326	134550		284394	220213	220883	213110	151804	183298	179290	97540	136616	95972	335	52.127	77.4378	63.7221	60.0182	0	59.4985	64.301	44.575	37.1767	0	78.5792	60.8458	61.0309	58.8832	41.9441	50.646	49.5386	26.9507	37.7476	26.5175
	336	184449	276209	226817	216823		215819	230666	163349	134534		289007	213891	219456	208778	155248	179803	183706	98337	134702	97105	336	50.964	76.3177	62.6705	59.9091	0	59.6317	63.734	45.134	37.1723	0	79.8538	59.099	60.6366	57.6862	42.8957	49.6803	50.7587	27.1709	37.2187	26.8305
	337	183625	276228	231157	216800		214481	234849	165124	134361		293897	215546	221796	205643	153583	185032	179522	97498	137150	95765	337	50.7364	76.3229	63.8696	59.9027	0	59.262	64.8898	45.6244	37.1245	0	81.205	59.5563	61.2832	56.82	42.4356	51.1251	49.6027	26.9391	37.8951	26.4603
	338	185838	275340	242344	218604		214005	233479	165080	134603		287024	218144	224889	201989	153025	189988	180224	98287	135397	97200	338	51.3478	76.0776	66.9607	60.4012	0	59.1305	64.5112	45.6123	37.1914	0	79.3059	60.2741	62.1378	55.8104	42.2814	52.4945	49.7966	27.1571	37.4108	26.8568
	339	190642	277378	245638	216574		217353	234338	168863	134961		288738	222457	220750	202552	154539	190301	189621	98610	135274	97148	339	52.6752	76.6407	67.8708	59.8403	0	60.0555	64.7486	46.6575	37.2903	0	79.7795	61.4658	60.9941	55.966	42.6998	52.581	52.3931	27.2464	37.3768	26.8424
	340	183964	278989	249201	216794		212770	237929	163328	136697		286676	221042	224117	209609	156967	189456	187865	98415	135363	98330	340	50.83	77.0858	68.8553	59.9011	0	58.7892	65.7408	45.1282	37.7699	0	79.2098	61.0748	61.9245	57.9158	43.3706	52.3475	51.9079	27.1925	37.4014	27.169
	341	185816	277087	256757	219744		218806	236206		136783		284851	217471	221038	205724	157103	191226	184930	99431	134257	97379	341	51.3417	76.5603	70.943	60.7162	0	60.457	65.2647	0	37.7937	0	78.7055	60.0881	61.0737	56.8424	43.4082	52.8365	51.0969	27.4732	37.0958	26.9062
	342	184926	280090	258516	219212		215485	237481		136745		286636	225621	216695	205801	158916	196131	180733	100204	134485	97447	342	51.0958	77.39	71.429	60.5692	0	59.5394	65.617	0	37.7832	0	79.1987	62.34	59.8737	56.8637	43.9092	54.1918	49.9373	27.6868	37.1588	26.925
	343	186784	278864	257486	219776		214036	236698		136716		290845	227208	221892	204598	157247	191964	181122	100132	135461	96352	343	51.6092	77.0513	71.1445	60.725	0	59.139	65.4006	0	37.7752	0	80.3617	62.7785	61.3097	56.5313	43.448	53.0405	50.0448	27.6669	37.4284	26.6225
	344	180077	278724	257676	217877		215338	237913		137895		291706	215397	220133	208740	158760	192017	180602	99712	136773	96091	344	49.756	77.0126	71.1969	60.2003	0	59.4988	65.7364	0	38.101	0	80.5996	59.5151	60.8237	57.6757	43.866	53.0551	49.9011	27.5508	37.7909	26.5503
	345	189431	279301	258780	221835		218002	239083		138489		288528	220779	218618	214236	156490	190228	188747	100973	137164	97929	345	52.3406	77.172	71.502	61.2939	0	60.2349	66.0596	0	38.2651	0	79.7215	61.0022	60.4051	59.1943	43.2388	52.5608	52.1516	27.8993	37.899	27.0582
	346	190672	279991	256453	221764		214831	236081		138692		287498	222924	219338	208656	158813	189203	192784	101362	137358	97529	346	52.6835	77.3627	70.859	61.2743	0	59.3587	65.2302	0	38.3212	0	79.4369	61.5948	60.604	57.6525	43.8807	52.2776	53.267	28.0067	37.9526	26.9477
	347	193117	276471	247785	222418		214362	238685		137819		286053	219484	220711	213623	157638	192892	189214	101306	136108	96825	347	53.359	76.3901	68.464	61.455	0	59.2291	65.9497	0	38.08	0	79.0376	60.6443	60.9834	59.0249	43.556	53.2969	52.2806	27.9913	37.6072	26.7531
	348	191899	277653	247192	223186		212448	238021		137460		281782	226873	218685	206933	157603	194450	185462	101389	137016	96765	348	53.0225	76.7167	68.3002	61.6672	0	58.7003	65.7662	0	37.9808	0	77.8575	62.686	60.4236	57.1764	43.5464	53.7273	51.2439	28.0142	37.8581	26.7366
	349	193204	279561	245933	223308		213052	239123		139390		286075	225913	220652	210554	157674	188876	191950	101871	138729	99089	349	53.3831	77.2439	67.9523	61.7009	0	58.8672	66.0707	0	38.514	0	79.0437	62.4207	60.9671	58.1769	43.566	52.1872	53.0366	28.1474	38.3314	27.3787
	350	191176	283761	239884	222939		213706	242970		138833		288338	223585	229654	207984	155627	189365	193288	102456	134874	99391	350	52.8227	78.4043	66.2809	61.599	0	59.0479	67.1336	0	38.3601	0	79.669	61.7775	63.4544	57.4668	43.0004	52.3223	53.4063	28.309	37.2662	27.4621
	351	182107	280612	243422	224108		215416	243296		133307		297619	222821	232455	208128	158108	186064	198454	101918	137705	98492	351	50.3169	77.5343	67.2585	61.922	0	59.5203	67.2237	0	36.8333	0	82.2334	61.5664	64.2283	57.5066	43.6859	51.4103	54.8337	28.1604	38.0485	27.2137
	352	186402	278355	239527	221561		219187	244250		130258		291811	219748	232280	215883	158918	192217	197039	102838	137313	98362	352	51.5036	76.9106	66.1823	61.2182	0	60.5623	67.4873	0	35.9908	0	80.6286	60.7173	64.1799	59.6494	43.9097	53.1104	54.4427	28.4146	37.9402	27.1778
	353	187074	281238	244953	223688		221485	243380		126874		291751	220089	239274	210360	161670	191801	191286	103676	140441	98330	353	51.6893	77.7072	67.6815	61.8059	0	61.1972	67.2469	0	35.0558	0	80.612	60.8115	66.1124	58.1233	44.6701	52.9954	52.8531	28.6461	38.8044	27.169
	354	191685	281945	248025	225489		216443	245845		123551		287280	229723	234993	206753	162109	187960	200468	103862	137291	98805	354	52.9634	77.9026	68.5303	62.3035	0	59.8041	67.928	0	34.1377	0	79.3767	63.4734	64.9295	57.1267	44.7914	51.9341	55.3901	28.6975	37.9341	27.3002
	355	186955	282148	248970	224584		219031	246976		120627		286589	222441	244377	208138	165662	190224	194230	103973	135489	97642	355	51.6564	77.9587	68.7914	62.0535	0	60.5192	68.2405	0	33.3297	0	79.1857	61.4614	67.5224	57.5094	45.7731	52.5597	53.6666	28.7282	37.4362	26.9789
	356	191043	283701	249928	222871		219355	248924		118683		295156	221135	248485	216176	160523	189958	195372	105026	137909	96611	356	52.786	78.3878	69.0561	61.5802	0	60.6087	68.7787	0	32.7926	0	81.5528	61.1005	68.6574	59.7303	44.3532	52.4862	53.9821	29.0191	38.1048	26.694
	357	191556	284416	258564	222710		216325	249291		118211		289844	231324	254564	215980	162515	195387	199057				357	52.9277	78.5853	71.4423	61.5357	0	59.7715	68.8801	0	32.6622	0	80.0851	63.9158	70.3371	59.6762	44.9036	53.9862	55.0003
	358	196961	282220	256289	224184		221078	251253		116309		291264	232672	257724	213365	160623	192545	195478				358	54.4211	77.9786	70.8137	61.943	0	61.0848	69.4222	0	32.1367	0	80.4775	64.2882	71.2102	58.9536	44.3808	53.201	54.0114
	359	192219	281879	261937	221518		224202	249735		113536			231606	243123	221281	166771	197020	198623				359	53.1109	77.8843	72.3743	61.2063	0	61.9479	69.0028	0	31.3705	0	0	63.9937	67.1759	61.1409	46.0795	54.4374	54.8804
		194526		259714			225885	251849		114583				246572	216302	167787	203166
		190555		262240			221230	253249		113538				236435	215142	167898	202478
		191042					223547	254462		115177				237377	215041	164190	205344
		195726						253957		113576				233672	216221	164573	203195
		200163								114763					212442		206043
																	204269
																	205365
																	206095
[truncated: 1 more columns]
