# Supplementary material for: Activated αIIbβ3 on platelets mediates flow-dependent NETosis via SLC44A2
Source: eLife. 2020 Apr 21;9:e53353. doi: 10.7554/eLife.53353 (PMC7253179; doi:10.7554/eLife.53353)
Supplement: Figure 1—source data 1. [file elife-53353-fig1-data1.xlsx]

## Sheet: Figure 1c -Platelet rolling
Platelet rolling	A1	A1*
	242.2	21.91
	196.1	10.64
	161.7	10.08
	98.58	8.654
	90.26	8.066
	86.58	7.211
	85.76	6.947
	80.25	6.94
	77.73	6.894
	76.13	6.701
	63.35	6.671
	63.01	6.45
	62.77	5.943
	62.77	5.935
	62.09	5.679
	60.18	5.594
	49.71	5.511
	46.15	5.319
	40.75	5.319
	40.45	5.308
	37.84	5.296
	32.63	5.2
	32.36	5.2
	31.09	5.2
	30.96	4.912
	29.83	4.667
	29.3	4.561
	27.04	4.561
	24.75	4.546
	24.31	4.527
	24.14	4.079
	23.82	4.079
	23.69	4.079
	23.08	4
	21.73	3.938
	21.28	3.919
	20.93	3.895
	20.79	3.848
	20.64	3.846
	20.16	3.473
	19.73	3.365
	19.51	3.289
	19.31	3.225
	19.17	3.225
	19.12	3.124
	19.09	3.121
	19.01	3.095
	18.6	2.97
	18.6	2.885
	18.3	2.882
	18.1	2.868
	17.89	2.804
	17.78	2.786
	17.73	2.72
	17.71	2.708
	17.19	2.676
	16.3	2.659
	16.29	2.659
	16.16	2.598
	15.84	2.565
	15.69	2.55
	15.48	2.542
	15.48	2.539
	15.48	2.527
	15.03	2.521
	14.83	2.516
	14.75	2.508
	14.69	2.486
	14.62	2.427
	14.59	2.393
	14.59	2.375
	14.59	2.328
	14.59	2.326
	14.59	2.297
	14.59	2.283
	14.18	2.28
	13.89	2.239
	13.87	2.193
	13.74	2.188
	13.67	2.163
	13.28	2.135
	13.19	2.132
	13.17	2.099
	13.15	2.08
	13.11	2.08
	12.97	2.067
	12.94	2.056
	12.92	2.052
	12.9	2.045
	12.81	2.04
	12.75	2.028
	12.73	2.019
	12.46	2.016
	12.42	1.999
	12.28	1.938
	12.25	1.935
	12.19	1.931
	12.17	1.908
	12.02	1.9
	11.85	1.875
	11.82	1.837
	11.81	1.826
	11.8	1.824
	11.78	1.824
	11.69	1.824
	11.62	1.824
	11.56	1.824
	11.54	1.806
	11.54	1.803
	11.54	1.801
	11.54	1.793
	11.4	1.786
	11.37	1.783
	11.25	1.783
	11.24	1.78
	11.23	1.774
	11.21	1.773
	11.18	1.773
	11.13	1.772
	11.09	1.771
	11.07	1.76
	11.04	1.737
	11.03	1.735
	10.98	1.719
	10.89	1.719
	10.82	1.717
	10.82	1.708
	10.73	1.683
	10.7	1.648
	10.7	1.637
	10.57	1.63
	10.56	1.626
	10.55	1.625
	10.49	1.617
	10.46	1.612
	10.43	1.61
	10.4	1.596
	10.34	1.568
	10.34	1.562
	10.32	1.551
	10.32	1.545
	10.32	1.539
	10.32	1.533
	10.32	1.529
	10.32	1.524
	10.32	1.517
	10.32	1.516
	10.32	1.491
	10.32	1.475
	10.32	1.46
	10.32	1.458
	10.32	1.448
	10.32	1.444
	10.32	1.442
	10.32	1.442
	10.32	1.442
	10.32	1.441
	10.32	1.441
	10.32	1.439
	10.32	1.429
	10.32	1.424
	10.31	1.406
	10.31	1.397
	10.3	1.395
	10.3	1.393
	10.3	1.367
	10.3	1.36
	10.3	1.358
	10.22	1.34
	10.07	1.331
	10.06	1.329
	9.962	1.323
	9.867	1.317
	9.824	1.312
	9.817	1.312
	9.813	1.312
	9.715	1.31
	9.615	1.31
	9.588	1.297
	9.564	1.295
	9.514	1.293
	9.418	1.292
	9.391	1.29
	9.389	1.29
	9.352	1.29
	9.326	1.29
	9.23	1.29
	9.164	1.29
	9.074	1.29
	9.053	1.29
	9.049	1.29
	9.006	1.29
	8.981	1.29
	8.958	1.29
	8.929	1.29
	8.894	1.29
	8.857	1.29
	8.833	1.29
	8.822	1.29
	8.812	1.29
	8.809	1.29
	8.809	1.29
	8.769	1.29
	8.661	1.29
	8.602	1.29
	8.6	1.29
	8.597	1.29
	8.597	1.29
	8.542	1.29
	8.526	1.29
	8.406	1.29
	8.349	1.29
	8.341	1.29
	8.324	1.29
	8.305	1.29
	8.299	1.29
	8.26	1.29
	8.253	1.289
	8.227	1.289
	8.14	1.289
	8.132	1.289
	8.12	1.287
	8.051	1.287
	8.049	1.287
	7.979	1.287
	7.847	1.287
	7.843	1.287
	7.786	1.287
	7.78	1.287
	7.777	1.287
	7.74	1.287
	7.74	1.281
	7.74	1.279
	7.738	1.265
	7.736	1.245
	7.732	1.233
	7.732	1.231
	7.715	1.217
	7.692	1.216
	7.692	1.211
	7.692	1.211
	7.691	1.21
	7.684	1.195
	7.652	1.192
	7.634	1.19
	7.601	1.187
	7.6	1.183
	7.592	1.181
	7.579	1.181
	7.55	1.163
	7.462	1.149
	7.406	1.14
	7.384	1.14
	7.312	1.128
	7.297	1.127
	7.297	1.126
	7.297	1.125
	7.297	1.121
	7.297	1.115
	7.297	1.107
	7.297	1.1
	7.297	1.097
	7.297	1.096
	7.297	1.091
	7.297	1.088
	7.29	1.088
	7.286	1.085
	7.284	1.074
	7.283	1.072
	7.283	1.065
	7.283	1.059
	7.283	1.058
	7.283	1.056
	7.281	1.055
	7.251	1.045
	7.206	1.044
	7.196	1.019
	7.169	1.019
	7.076	1.018
	7.058	1.017
	7.056	1.016
	7.052	1.015
	7.044	1.013
	7.044	1.011
	6.977	1.01
	6.951	1.008
	6.933	1.005
	6.923	0.9942
	6.912	0.994
	6.906	0.9905
	6.89	0.9897
	6.88	0.9866
	6.88	0.9857
	6.875	0.9764
	6.875	0.9675
	6.875	0.9675
	6.864	0.9675
	6.773	0.9675
	6.758	0.9675
	6.742	0.9675
	6.738	0.967
	6.732	0.9665
	6.732	0.9665
	6.697	0.9665
	6.682	0.9626
	6.65	0.9615
	6.624	0.9615
	6.599	0.9615
	6.596	0.9564
	6.585	0.9527
	6.581	0.9437
	6.581	0.9435
	6.571	0.9427
	6.521	0.9397
	6.52	0.9394
	6.514	0.938
	6.503	0.9369
	6.49	0.9342
	6.46	0.9298
	6.45	0.9274
	6.45	0.925
	6.45	0.9212
	6.45	0.9175
	6.447	0.9122
	6.439	0.9122
	6.414	0.9122
	6.409	0.9122
	6.401	0.9122
	6.399	0.9122
	6.37	0.9122
	6.361	0.9122
	6.29	0.9122
	6.29	0.9122
	6.282	0.9122
	6.277	0.9122
	6.276	0.9122
	6.272	0.9122
	6.27	0.9113
	6.264	0.9103
	6.261	0.9103
	6.247	0.9078
	6.229	0.9052
	6.229	0.9045
	6.224	0.9003
	6.221	0.8902
	6.202	0.8895
	6.191	0.8865
	6.187	0.8865
	6.181	0.8845
	6.18	0.8822
	6.178	0.88
	6.129	0.8781
	6.098	0.8776
	6.085	0.8721
	6.081	0.8719
	6.047	0.87
	6.045	0.8698
	6.039	0.8694
	5.996	0.868
	5.983	0.86
	5.976	0.86
	5.971	0.86
	5.968	0.86
	5.966	0.86
	5.947	0.8597
	5.947	0.8594
	5.943	0.8587
	5.904	0.8575
	5.897	0.8569
	5.895	0.8485
	5.895	0.8403
	5.89	0.8376
	5.87	0.8352
	5.869	0.8271
	5.867	0.8262
	5.845	0.8232
	5.838	0.8231
	5.838	0.821
	5.805	0.8195
	5.792	0.8171
	5.791	0.8171
	5.769	0.8156
	5.769	0.8156
	5.769	0.815
	5.769	0.8126
	5.766	0.8123
	5.764	0.8081
	5.76	0.8076
	5.741	0.8072
	5.73	0.8052
	5.719	0.8051
	5.696	0.8011
	5.694	0.8007
	5.685	0.7974
	5.664	0.7954
	5.646	0.795
	5.643	0.7946
	5.616	0.7945
	5.603	0.788
	5.576	0.787
	5.575	0.7821
	5.569	0.7817
	5.566	0.7812
	5.562	0.7786
	5.548	0.7786
	5.484	0.7786
	5.483	0.7772
	5.467	0.7752
	5.463	0.7737
	5.459	0.7737
	5.457	0.7734
	5.439	0.7716
	5.435	0.7701
	5.425	0.7661
	5.425	0.7639
	5.422	0.7629
	5.419	0.7604
	5.404	0.7574
	5.399	0.7574
	5.363	0.7546
	5.348	0.7542
	5.346	0.7536
	5.332	0.7522
	5.329	0.7516
	5.323	0.7489
	5.319	0.7461
	5.303	0.7451
	5.297	0.7441
	5.286	0.7426
	5.266	0.7402
	5.261	0.739
	5.251	0.7365
	5.25	0.7348
	5.201	0.7341
	5.17	0.7341
	5.16	0.7334
	5.16	0.7293
	5.16	0.7275
	5.16	0.7254
	5.16	0.7251
	5.16	0.7211
	5.16	0.7211
	5.16	0.721
	5.16	0.7192
	5.16	0.7152
	5.16	0.7125
	5.16	0.7114
	5.16	0.7084
	5.16	0.7083
	5.16	0.7053
	5.16	0.7051
	5.16	0.7044
	5.16	0.7009
	5.16	0.6974
	5.16	0.6972
	5.16	0.6958
	5.16	0.6958
	5.16	0.6958
	5.16	0.6924
	5.16	0.6841
	5.16	0.6837
	5.16	0.6834
	5.16	0.683
	5.16	0.6821
	5.16	0.6804
	5.16	0.6797
	5.16	0.6795
	5.16	0.6773
	5.16	0.6748
	5.16	0.6741
	5.16	0.6718
	5.16	0.6703
	5.16	0.6642
	5.16	0.6628
	5.16	0.6619
	5.16	0.6609
	5.16	0.6579
	5.16	0.6545
	5.16	0.6533
	5.16	0.6527
	5.16	0.6522
	5.16	0.6521
	5.16	0.6516
	5.16	0.651
	5.16	0.6509
	5.16	0.648
	5.16	0.6463
	5.16	0.645
	5.16	0.645
	5.16	0.645
	5.16	0.645
	5.159	0.645
	5.158	0.645
	5.158	0.645
	5.157	0.645
	5.157	0.645
	5.157	0.645
	5.157	0.645
	5.155	0.645
	5.155	0.645
	5.155	0.645
	5.155	0.645
	5.155	0.645
	5.155	0.645
	5.155	0.645
	5.155	0.645
	5.15	0.645
	5.15	0.645
	5.15	0.645
	5.15	0.645
	5.15	0.645
	5.15	0.645
	5.15	0.645
	5.15	0.645
	5.15	0.645
	5.142	0.645
	5.127	0.645
	5.127	0.645
	5.12	0.645
	5.1	0.645
	5.095	0.645
	5.089	0.645
	5.088	0.645
	5.086	0.645
	5.077	0.645
	5.077	0.645
	5.062	0.645
	5.058	0.645
	5.054	0.645
	5.042	0.645
	5.038	0.645
	5.025	0.645
	5.024	0.645
	5.023	0.645
	5.02	0.645
	5.004	0.645
	4.986	0.645
	4.986	0.645
	4.985	0.645
	4.983	0.645
	4.981	0.645
	4.981	0.645
	4.981	0.645
	4.969	0.645
	4.941	0.645
	4.938	0.645
	4.935	0.645
	4.935	0.645
	4.904	0.645
	4.898	0.645
	4.896	0.645
	4.895	0.645
	4.894	0.645
	4.893	0.645
	4.873	0.645
	4.867	0.645
	4.865	0.645
	4.865	0.645
	4.865	0.645
	4.865	0.645
	4.865	0.645
	4.862	0.645
	4.857	0.645
	4.855	0.645
	4.843	0.645
	4.829	0.645
	4.827	0.645
	4.821	0.645
	4.818	0.645
	4.815	0.645
	4.807	0.645
	4.803	0.645
	4.797	0.645
	4.792	0.645
	4.79	0.645
	4.781	0.645
	4.777	0.645
	4.765	0.645
	4.761	0.645
	4.755	0.645
	4.749	0.645
	4.746	0.645
	4.741	0.645
	4.734	0.645
	4.719	0.645
	4.718	0.645
	4.707	0.645
	4.704	0.6448
	4.696	0.6447
	4.696	0.6447
	4.691	0.6447
	4.688	0.6447
	4.678	0.6447
	4.659	0.6446
	4.641	0.6446
	4.637	0.6446
	4.605	0.6446
	4.586	0.6446
	4.585	0.6444
	4.578	0.6444
	4.571	0.6444
	4.556	0.6444
	4.531	0.6444
	4.515	0.6444
	4.508	0.6437
	4.503	0.6437
	4.502	0.6437
	4.501	0.6437
	4.498	0.6437
	4.489	0.6437
	4.478	0.6437
	4.471	0.6437
	4.449	0.6437
	4.436	0.6437
	4.42	0.6424
	4.409	0.6424
	4.409	0.6406
	4.405	0.6403
	4.403	0.6403
	4.403	0.6386
	4.402	0.6352
	4.401	0.6335
	4.399	0.6328
	4.395	0.6325
	4.391	0.6324
	4.379	0.6322
	4.374	0.6294
	4.353	0.6277
	4.343	0.6242
	4.343	0.6216
	4.334	0.6212
	4.318	0.619
	4.308	0.6174
	4.302	0.6168
	4.299	0.6163
	4.299	0.6154
	4.298	0.6098
	4.297	0.6089
	4.297	0.6081
	4.296	0.6081
	4.295	0.6081
	4.295	0.6081
	4.295	0.6081
	4.293	0.6081
	4.279	0.6081
	4.268	0.6081
	4.263	0.6079
	4.258	0.6079
	4.256	0.6077
	4.245	0.6072
	4.241	0.6068
	4.24	0.6047
	4.235	0.6046
	4.226	0.6039
	4.225	0.603
	4.223	0.6015
	4.22	0.6006
	4.218	0.5999
	4.215	0.5978
	4.201	0.5975
	4.195	0.5965
	4.18	0.594
	4.17	0.5937
	4.165	0.5912
	4.164	0.5907
	4.16	0.5899
	4.156	0.5898
	4.152	0.5894
	4.15	0.589
	4.15	0.5887
	4.15	0.5879
	4.136	0.5859
	4.134	0.5845
	4.131	0.5839
	4.128	0.5825
	4.128	0.582
	4.128	0.5813
	4.126	0.5769
	4.126	0.5769
	4.126	0.5761
	4.123	0.5751
	4.122	0.5751
	4.121	0.5743
	4.112	0.574
	4.11	0.5732
	4.109	0.5732
	4.108	0.5726
	4.103	0.5719
	4.101	0.5705
	4.1	0.5705
	4.096	0.5705
	4.094	0.5694
	4.089	0.5663
	4.085	0.5653
	4.082	0.565
	4.077	0.5649
	4.076	0.5637
	4.071	0.5629
	4.053	0.5629
	4.047	0.5623
	4.046	0.562
	4.044	0.5617
	4.041	0.5611
	4.025	0.5605
	4.024	0.5596
	4.022	0.5585
	4.018	0.5556
	4.016	0.5551
	4.01	0.5549
	4.004	0.5546
	4.004	0.553
	4	0.553
	3.999	0.5527
	3.99	0.5527
	3.99	0.5523
	3.986	0.5515
	3.986	0.5496
	3.98	0.5493
	3.974	0.5489
	3.969	0.5486
	3.968	0.5481
	3.965	0.5481
	3.961	0.5478
	3.959	0.5475
	3.946	0.5458
	3.945	0.5451
	3.934	0.545
	3.902	0.5426
	3.898	0.5418
	3.894	0.5377
	3.892	0.5376
	3.887	0.537
	3.883	0.5369
	3.878	0.5364
	3.877	0.5359
	3.87	0.5358
	3.87	0.5355
	3.87	0.5355
	3.869	0.5355
	3.868	0.5346
	3.868	0.5344
	3.868	0.5336
	3.868	0.5331
	3.868	0.5321
	3.868	0.5311
	3.864	0.5302
	3.864	0.5296
	3.863	0.529
	3.86	0.5277
	3.858	0.5268
	3.853	0.5268
	3.853	0.5265
	3.851	0.5261
	3.846	0.5259
	3.846	0.525
	3.846	0.5247
	3.846	0.5247
	3.846	0.5244
	3.846	0.5241
	3.846	0.524
	3.846	0.5238
	3.846	0.522
	3.846	0.5217
	3.842	0.5213
	3.842	0.5204
	3.841	0.5202
	3.84	0.5187
	3.839	0.5187
	3.838	0.5171
	3.837	0.5167
	3.833	0.516
	3.818	0.516
	3.816	0.516
	3.814	0.5158
	3.795	0.5158
	3.795	0.5158
	3.779	0.5146
	3.776	0.5145
	3.768	0.5143
	3.761	0.5139
	3.758	0.5135
	3.757	0.5131
	3.751	0.5126
	3.743	0.5115
	3.742	0.5108
	3.731	0.5099
	3.728	0.5099
	3.721	0.5094
	3.721	0.5092
	3.718	0.5074
	3.716	0.5071
	3.716	0.507
	3.712	0.5059
	3.711	0.5054
	3.711	0.5052
	3.709	0.5047
	3.705	0.5043
	3.702	0.5035
	3.699	0.5026
	3.693	0.5017
	3.686	0.5001
	3.684	0.4987
	3.679	0.4987
	3.679	0.4976
	3.678	0.4965
	3.677	0.4951
	3.677	0.4947
	3.666	0.4939
	3.662	0.4937
	3.655	0.4937
	3.655	0.4929
	3.653	0.4924
	3.649	0.4921
	3.649	0.4918
	3.649	0.4914
	3.649	0.491
	3.649	0.4909
	3.648	0.4897
	3.647	0.4894
	3.645	0.489
	3.644	0.4884
	3.642	0.488
	3.641	0.4879
	3.641	0.4873
	3.641	0.4871
	3.637	0.4869
	3.635	0.4869
	3.626	0.4865
	3.623	0.4863
	3.621	0.4862
	3.619	0.4837
	3.613	0.4835
	3.613	0.4835
	3.607	0.4835
	3.606	0.4835
	3.606	0.4835
	3.601	0.4835
	3.601	0.4835
	3.598	0.4833
	3.594	0.4821
	3.593	0.4821
	3.59	0.4817
	3.588	0.4811
	3.587	0.4808
	3.577	0.4808
	3.576	0.4808
	3.575	0.4808
	3.571	0.4808
	3.561	0.4808
	3.558	0.4808
	3.558	0.4808
	3.557	0.4808
	3.555	0.4808
	3.551	0.4808
	3.548	0.4808
	3.545	0.4808
	3.542	0.4808
	3.542	0.4806
	3.541	0.4804
	3.536	0.4804
	3.536	0.4804
	3.526	0.4803
	3.524	0.4803
	3.522	0.4803
	3.518	0.4803
	3.512	0.4798
	3.509	0.4798
	3.509	0.4798
	3.506	0.477
	3.504	0.4745
	3.503	0.4744
	3.501	0.4744
	3.497	0.4728
	3.493	0.4726
	3.49	0.4725
	3.488	0.4723
	3.483	0.4723
	3.48	0.4711
	3.478	0.4704
	3.477	0.4692
	3.473	0.4689
	3.466	0.4685
	3.461	0.4681
	3.456	0.4681
	3.442	0.4679
	3.44	0.4678
	3.44	0.4675
	3.44	0.467
	3.44	0.467
	3.44	0.4668
	3.44	0.4667
	3.44	0.4665
	3.44	0.4651
	3.44	0.4648
	3.44	0.4648
	3.439	0.4646
	3.439	0.4639
	3.439	0.4631
	3.439	0.4616
	3.438	0.4614
	3.438	0.4612
	3.438	0.4611
	3.438	0.4609
	3.438	0.4607
	3.438	0.4607
	3.438	0.4606
	3.438	0.4604
	3.438	0.4593
	3.435	0.459
	3.423	0.4578
	3.41	0.4574
	3.409	0.4569
	3.408	0.4565
	3.396	0.4565
	3.394	0.4561
	3.39	0.4561
	3.385	0.4561
	3.384	0.4539
	3.382	0.4532
	3.378	0.4529
	3.367	0.4528
	3.364	0.4514
	3.361	0.4513
	3.358	0.4512
	3.357	0.4508
	3.346	0.4504
	3.334	0.4504
	3.331	0.4502
	3.33	0.4495
	3.324	0.449
	3.324	0.4474
	3.32	0.4471
	3.318	0.4468
	3.311	0.4466
	3.311	0.4442
	3.304	0.444
	3.3	0.4438
	3.296	0.4436
	3.293	0.4432
	3.291	0.4432
	3.287	0.4432
	3.287	0.4427
	3.286	0.4426
	3.285	0.4425
	3.282	0.4419
	3.279	0.4413
	3.279	0.4411
	3.272	0.4404
	3.268	0.4398
	3.267	0.4375
	3.263	0.4369
	3.263	0.4366
	3.263	0.4351
	3.262	0.435
	3.262	0.4346
	3.261	0.4337
	3.259	0.4334
	3.258	0.4334
	3.257	0.4328
	3.257	0.4324
	3.257	0.4311
	3.256	0.4306
	3.256	0.4305
	3.253	0.4303
	3.253	0.43
	3.25	0.43
	3.25	0.43
	3.246	0.43
	3.243	0.43
	3.242	0.43
	3.242	0.43
	3.239	0.43
	3.239	0.43
	3.238	0.43
	3.237	0.43
	3.233	0.43
	3.23	0.43
	3.23	0.4299
	3.225	0.4299
	3.224	0.4299
	3.211	0.4299
	3.207	0.4299
	3.206	0.4298
	3.203	0.4298
	3.203	0.4297
	3.198	0.4297
	3.196	0.4297
	3.193	0.4297
	3.192	0.4297
	3.191	0.4297
	3.188	0.4297
	3.181	0.4297
	3.18	0.4297
	3.175	0.4297
	3.175	0.4297
	3.174	0.4297
	3.171	0.4297
	3.17	0.4297
	3.17	0.4297
	3.17	0.4297
	3.169	0.4297
	3.168	0.4294
	3.161	0.4288
	3.156	0.4284
	3.154	0.427
	3.143	0.4268
	3.138	0.4261
	3.133	0.426
	3.121	0.4257
	3.114	0.4257
	3.108	0.4256
	3.107	0.4242
	3.103	0.4237
	3.1	0.4233
	3.099	0.4232
	3.098	0.4228
	3.096	0.4226
	3.096	0.4223
	3.095	0.4222
	3.095	0.422
	3.086	0.4214
	3.085	0.4214
	3.083	0.4211
	3.079	0.4209
	3.079	0.4198
	3.078	0.4195
	3.073	0.4177
	3.07	0.4166
	3.066	0.4165
	3.059	0.4159
	3.044	0.4158
	3.041	0.4148
	3.041	0.4148
	3.04	0.4148
	3.04	0.4145
	3.036	0.4138
	3.03	0.4128
	3.026	0.4123
	3.025	0.4116
	3.02	0.4109
	3.017	0.4107
	3.014	0.4101
	3.014	0.4093
	3.01	0.4084
	3.007	0.4079
	3.004	0.4079
	2.997	0.4079
	2.991	0.4079
	2.99	0.4079
	2.989	0.4079
	2.988	0.4079
	2.987	0.4079
	2.983	0.4079
	2.979	0.4079
	2.975	0.4079
	2.968	0.4079
	2.968	0.4078
	2.966	0.4075
	2.965	0.4071
	2.963	0.4071
	2.96	0.407
	2.957	0.4069
	2.956	0.4067
	2.952	0.4063
	2.951	0.4061
	2.951	0.4061
	2.948	0.406
	2.948	0.4056
	2.948	0.4056
	2.948	0.4051
	2.948	0.4051
	2.948	0.4049
	2.948	0.4048
	2.948	0.4041
	2.946	0.4041
	2.946	0.4041
	2.938	0.4039
	2.937	0.4034
	2.935	0.403
	2.934	0.403
	2.934	0.4022
	2.934	0.4021
	2.932	0.4017
	2.931	0.4017
	2.925	0.401
	2.925	0.401
	2.925	0.4005
	2.919	0.4001
	2.91	0.3987
	2.909	0.3986
	2.905	0.3984
	2.902	0.3981
	2.898	0.3974
	2.898	0.3973
	2.89	0.3968
	2.885	0.3965
	2.885	0.3965
	2.885	0.3964
	2.884	0.3961
	2.883	0.396
	2.882	0.3958
	2.88	0.3956
	2.879	0.3952
	2.879	0.3945
	2.872	0.3943
	2.87	0.3943
	2.869	0.3943
	2.866	0.3942
	2.866	0.3942
	2.858	0.3941
	2.856	0.3939
	2.854	0.3936
	2.85	0.3933
	2.849	0.3927
	2.848	0.3923
	2.846	0.3921
	2.843	0.3918
	2.838	0.3917
	2.837	0.3917
	2.834	0.3914
	2.83	0.3909
	2.828	0.3908
	2.824	0.3908
	2.823	0.3907
	2.823	0.3902
	2.818	0.3897
	2.817	0.3896
	2.814	0.3895
	2.814	0.3891
	2.81	0.3888
	2.81	0.3877
	2.809	0.387
	2.807	0.387
	2.805	0.3869
	2.804	0.3868
	2.798	0.3868
	2.797	0.3868
	2.787	0.3868
	2.787	0.3868
	2.787	0.3868
	2.786	0.3868
	2.783	0.3868
	2.781	0.3868
	2.773	0.3868
	2.773	0.3867
	2.773	0.3866
	2.771	0.3857
	2.769	0.385
	2.766	0.3846
	2.761	0.3844
	2.76	0.384
	2.751	0.3832
	2.75	0.3828
	2.741	0.3828
	2.737	0.3828
	2.736	0.3827
	2.733	0.3823
	2.733	0.382
	2.732	0.382
	2.732	0.3819
	2.728	0.3814
	2.725	0.3814
	2.72	0.3812
	2.719	0.381
	2.714	0.3801
	2.713	0.3799
	2.711	0.3798
	2.707	0.3795
	2.707	0.3783
	2.704	0.3779
	2.704	0.3761
	2.698	0.376
	2.696	0.3755
	2.694	0.3752
	2.693	0.3751
	2.693	0.375
	2.691	0.375
	2.691	0.3745
	2.689	0.3741
	2.682	0.3733
	2.68	0.3732
	2.679	0.3726
	2.677	0.3725
	2.677	0.3723
	2.676	0.372
	2.675	0.3719
	2.672	0.3717
	2.671	0.3716
	2.671	0.3715
	2.671	0.3702
	2.667	0.3701
	2.666	0.37
	2.661	0.3699
	2.659	0.3693
	2.659	0.3688
	2.659	0.3685
	2.659	0.3685
	2.657	0.3685
	2.656	0.3685
	2.654	0.3685
	2.654	0.3684
	2.654	0.3682
	2.648	0.3679
	2.647	0.3676
	2.647	0.3669
	2.645	0.3668
	2.641	0.3661
	2.64	0.366
	2.638	0.366
	2.636	0.3657
	2.633	0.3655
	2.627	0.3652
	2.626	0.3652
	2.626	0.3651
	2.623	0.3647
	2.62	0.3646
	2.617	0.3641
	2.608	0.3638
	2.607	0.3634
	2.606	0.3628
	2.605	0.3628
	2.605	0.3627
	2.602	0.3627
	2.597	0.3627
	2.594	0.3626
	2.592	0.3624
	2.588	0.3618
	2.585	0.3613
	2.581	0.3609
	2.58	0.3606
	2.58	0.3606
	2.58	0.3606
	2.58	0.36
	2.58	0.3597
	2.58	0.3595
	2.58	0.3594
	2.58	0.3593
	2.58	0.3593
	2.58	0.3593
	2.58	0.3593
	2.58	0.3592
	2.58	0.3587
	2.58	0.3586
	2.58	0.358
	2.58	0.3575
	2.58	0.3571
	2.58	0.3571
	2.58	0.3569
	2.58	0.3556
	2.58	0.3556
	2.58	0.3546
	2.58	0.354
	2.58	0.353
	2.58	0.3528
	2.58	0.3525
	2.579	0.3525
	2.579	0.3523
	2.579	0.3521
	2.579	0.3514
	2.579	0.3512
	2.579	0.3511
	2.579	0.3508
	2.579	0.3506
	2.579	0.3505
	2.579	0.3504
	2.579	0.3504
	2.579	0.3503
	2.579	0.3496
	2.579	0.3491
	2.579	0.3479
	2.577	0.3473
	2.577	0.3472
	2.577	0.3472
	2.577	0.3467
	2.577	0.3461
	2.577	0.346
	2.577	0.3458
	2.576	0.3452
	2.576	0.3447
	2.576	0.3447
	2.571	0.3439
	2.568	0.3431
	2.564	0.3428
	2.558	0.3424
	2.554	0.3424
	2.547	0.3422
	2.544	0.342
	2.541	0.3419
	2.536	0.3417
	2.536	0.3416
	2.532	0.3416
	2.53	0.341
	2.53	0.3409
	2.527	0.3399
	2.527	0.3398
	2.519	0.3398
	2.512	0.3396
	2.51	0.3395
	2.51	0.3394
	2.507	0.3391
	2.507	0.3389
	2.506	0.3384
	2.506	0.3383
	2.504	0.3383
	2.503	0.338
	2.502	0.338
	2.501	0.3373
	2.499	0.3373
	2.498	0.3369
	2.498	0.3362
	2.491	0.3358
	2.49	0.3358
	2.488	0.3355
	2.485	0.3352
	2.484	0.335
	2.482	0.3347
	2.481	0.3345
	2.481	0.3344
	2.477	0.3342
	2.475	0.3339
	2.472	0.3336
	2.471	0.3332
	2.469	0.3331
	2.469	0.3329
	2.469	0.3323
	2.467	0.3322
	2.467	0.3317
	2.464	0.3316
	2.458	0.3314
	2.458	0.3313
	2.457	0.3306
	2.456	0.3302
	2.456	0.33
	2.456	0.3298
	2.454	0.3294
	2.453	0.329
	2.452	0.329
	2.451	0.3287
	2.445	0.3286
	2.445	0.328
	2.444	0.3276
	2.444	0.3275
	2.44	0.3273
	2.435	0.3272
	2.432	0.3271
	2.432	0.3266
	2.432	0.3264
	2.432	0.3263
	2.432	0.3261
	2.432	0.3259
	2.432	0.3258
	2.432	0.3254
	2.432	0.3253
	2.432	0.3252
	2.432	0.3251
	2.432	0.3246
	2.432	0.3241
	2.432	0.3239
	2.432	0.3237
	2.432	0.3231
	2.432	0.3231
	2.431	0.3231
	2.431	0.3226
	2.431	0.3225
	2.428	0.3225
	2.426	0.3225
	2.425	0.3225
	2.423	0.3225
	2.419	0.3225
	2.415	0.3225
	2.413	0.3225
	2.412	0.3225
	2.412	0.3225
	2.412	0.3225
	2.411	0.3225
	2.41	0.3225
	2.398	0.3225
	2.397	0.3225
	2.396	0.3225
	2.392	0.3225
	2.391	0.3225
	2.388	0.3225
	2.388	0.3225
	2.387	0.3225
	2.385	0.3225
	2.385	0.3225
	2.385	0.3225
	2.381	0.3225
	2.381	0.3225
	2.381	0.3225
	2.38	0.3225
	2.379	0.3225
	2.378	0.3225
	2.376	0.3225
	2.374	0.3225
	2.37	0.3225
	2.363	0.3225
	2.358	0.3225
	2.358	0.3225
	2.358	0.3225
	2.356	0.3225
	2.356	0.3225
	2.356	0.3225
	2.354	0.3225
	2.353	0.3225
	2.352	0.3225
	2.349	0.3225
	2.348	0.3225
	2.347	0.3224
	2.345	0.3224
	2.343	0.3224
	2.336	0.3224
	2.334	0.3224
	2.331	0.3224
	2.328	0.3224
	2.326	0.3224
	2.323	0.3224
	2.323	0.3224
	2.321	0.3224
	2.32	0.3223
	2.319	0.3223
	2.319	0.3223
	2.318	0.3223
	2.315	0.3223
	2.315	0.3223
	2.314	0.3223
	2.308	0.3223
	2.308	0.3223
	2.308	0.3223
	2.306	0.3223
	2.302	0.3222
	2.302	0.3222
	2.3	0.3222
	2.3	0.3222
	2.299	0.3222
	2.299	0.3222
	2.294	0.3222
	2.294	0.3222
	2.293	0.3221
	2.293	0.3218
	2.292	0.3216
	2.291	0.3216
	2.29	0.3216
	2.288	0.3215
	2.28	0.3213
	2.277	0.3213
	2.277	0.3212
	2.277	0.3207
	2.272	0.3207
	2.271	0.3205
	2.267	0.3205
	2.266	0.3203
	2.266	0.3203
	2.266	0.3203
	2.265	0.32
	2.262	0.3197
	2.258	0.3196
	2.258	0.3195
	2.257	0.3195
	2.257	0.3195
	2.257	0.3194
	2.255	0.3194
	2.254	0.319
	2.253	0.3189
	2.253	0.3188
	2.252	0.3188
	2.25	0.3187
	2.25	0.3185
	2.249	0.3182
	2.247	0.3177
	2.246	0.3172
	2.245	0.3167
	2.244	0.3164
	2.242	0.3164
	2.241	0.3164
	2.238	0.3163
	2.228	0.3163
	2.227	0.3161
	2.225	0.3161
	2.223	0.3154
	2.222	0.3146
	2.217	0.3145
	2.215	0.3144
	2.214	0.3142
	2.213	0.3141
	2.211	0.3134
	2.211	0.3133
	2.211	0.313
	2.211	0.3129
	2.211	0.3125
	2.21	0.3125
	2.209	0.3123
	2.209	0.3118
	2.208	0.3115
	2.207	0.3115
	2.206	0.3113
	2.205	0.3113
	2.199	0.3103
	2.196	0.3101
	2.195	0.3101
	2.194	0.3099
	2.191	0.3099
	2.19	0.3093
	2.189	0.3093
	2.185	0.3093
	2.185	0.3089
	2.184	0.3089
	2.184	0.3085
	2.183	0.3084
	2.182	0.3082
	2.182	0.3082
	2.181	0.3081
	2.178	0.3078
	2.178	0.3077
	2.176	0.3076
	2.175	0.3075
	2.174	0.3073
	2.174	0.3071
	2.172	0.3066
	2.171	0.3062
	2.171	0.3058
	2.168	0.3057
	2.168	0.3055
	2.166	0.3049
	2.161	0.3047
	2.158	0.3042
	2.158	0.3041
	2.157	0.3041
	2.156	0.3041
	2.155	0.3041
	2.155	0.3041
	2.153	0.3041
	2.15	0.3041
	2.146	0.3041
	2.144	0.3041
	2.144	0.3041
	2.139	0.3041
	2.139	0.3041
	2.138	0.3041
	2.136	0.3039
	2.134	0.3039
	2.132	0.3039
	2.131	0.3039
	2.129	0.3038
	2.128	0.3037
	2.127	0.3036
	2.123	0.3036
	2.12	0.3032
	2.115	0.3031
	2.114	0.303
	2.11	0.3028
	2.108	0.3026
	2.106	0.3025
	2.106	0.3019
	2.104	0.3019
	2.1	0.301
	2.097	0.3009
	2.097	0.3007
	2.093	0.3006
	2.093	0.3005
	2.086	0.3005
	2.086	0.3005
	2.085	0.3005
	2.084	0.3004
	2.084	0.3004
	2.084	0.2998
	2.083	0.2996
	2.079	0.2995
	2.077	0.2994
	2.076	0.2993
	2.074	0.2991
	2.074	0.299
	2.074	0.2986
	2.074	0.2985
	2.073	0.2983
	2.073	0.2982
	2.068	0.298
	2.066	0.2979
	2.064	0.2979
	2.064	0.2979
	2.064	0.2976
	2.064	0.2976
	2.064	0.2974
	2.064	0.2967
	2.063	0.2964
	2.063	0.296
	2.063	0.2952
	2.063	0.2945
	2.063	0.2942
	2.063	0.294
	2.063	0.2938
	2.059	0.2931
	2.059	0.293
	2.057	0.2929
	2.056	0.2928
	2.054	0.2925
	2.053	0.2922
	2.051	0.2921
	2.05	0.2919
	2.05	0.2917
	2.047	0.2917
	2.043	0.2911
	2.043	0.291
	2.042	0.2909
	2.042	0.2908
	2.042	0.2908
	2.04	0.2906
	2.04	0.2904
	2.04	0.2901
	2.037	0.2899
	2.037	0.2887
	2.033	0.2885
	2.032	0.2885
	2.029	0.2885
	2.027	0.2885
	2.026	0.2883
	2.025	0.2882
	2.023	0.2881
	2.02	0.2879
	2.019	0.2877
	2.017	0.2876
	2.016	0.2873
	2.015	0.2873
	2.014	0.2872
	2.013	0.2872
	2.012	0.2867
	2.01	0.2867
	2.009	0.2867
	2.009	0.2866
	2.006	0.2866
	1.991	0.2866
	1.989	0.2865
	1.987	0.2861
	1.986	0.2861
	1.985	0.2861
	1.985	0.2859
	1.984	0.2858
	1.981	0.2856
	1.978	0.2855
	1.977	0.2853
	1.974	0.2853
	1.973	0.2845
	1.968	0.2843
	1.968	0.2843
	1.967	0.2842
	1.963	0.2839
	1.963	0.2839
	1.96	0.2838
	1.959	0.2838
	1.957	0.2837
	1.957	0.2833
	1.957	0.2833
	1.956	0.2832
	1.953	0.2828
	1.953	0.2827
	1.952	0.2825
	1.95	0.2825
	1.95	0.2823
	1.947	0.2821
	1.945	0.282
	1.944	0.282
	1.94	0.2819
	1.938	0.2817
	1.936	0.2813
	1.936	0.2811
	1.935	0.281
	1.934	0.2809
	1.934	0.2807
	1.932	0.2804
	1.932	0.2803
	1.928	0.2803
	1.926	0.28
	1.924	0.2795
	1.923	0.2794
	1.923	0.279
	1.923	0.2789
	1.922	0.2789
	1.922	0.2787
	1.92	0.2784
	1.919	0.2781
	1.917	0.278
	1.917	0.2779
	1.914	0.2774
	1.914	0.2768
	1.911	0.2767
	1.91	0.2764
	1.909	0.2764
	1.908	0.2763
	1.906	0.2763
	1.905	0.2763
	1.9	0.2763
	1.9	0.2763
	1.898	0.2763
	1.897	0.2758
	1.897	0.2758
	1.897	0.2757
	1.891	0.2756
	1.889	0.2756
	1.888	0.2754
	1.885	0.2754
	1.884	0.2753
	1.884	0.275
	1.881	0.2748
	1.88	0.2748
	1.88	0.2748
	1.878	0.2747
	1.878	0.2745
	1.877	0.2744
	1.877	0.2742
	1.877	0.2742
	1.876	0.2741
	1.876	0.274
	1.874	0.2739
	1.872	0.2737
	1.871	0.2734
	1.869	0.2731
	1.868	0.273
	1.868	0.273
	1.862	0.273
	1.86	0.2728
	1.86	0.2728
	1.857	0.2727
	1.855	0.2726
	1.852	0.2725
	1.847	0.2725
	1.846	0.2722
	1.845	0.2721
	1.843	0.2721
	1.842	0.2721
	1.84	0.2718
	1.84	0.2717
	1.838	0.2716
	1.834	0.2715
	1.828	0.2713
	1.825	0.2713
	1.824	0.2711
	1.824	0.2708
	1.824	0.2705
	1.824	0.2703
	1.824	0.2702
	1.824	0.27
	1.824	0.2699
	1.823	0.2698
	1.823	0.2696
	1.822	0.2695
	1.822	0.269
	1.822	0.2687
	1.821	0.2685
	1.819	0.2684
	1.816	0.2684
	1.815	0.2684
	1.815	0.2682
	1.813	0.2682
	1.813	0.2682
	1.812	0.2674
	1.808	0.2674
	1.808	0.2671
	1.806	0.2669
	1.805	0.2668
	1.8	0.2668
	1.799	0.2667
	1.794	0.2665
	1.794	0.266
	1.791	0.2658
	1.785	0.2656
	1.784	0.2653
	1.782	0.2652
	1.775	0.265
	1.775	0.265
	1.775	0.2649
	1.774	0.2649
	1.774	0.2649
	1.774	0.2647
	1.773	0.2646
	1.772	0.2646
	1.771	0.2643
	1.769	0.2642
	1.768	0.2642
	1.768	0.2641
	1.765	0.264
	1.763	0.2639
	1.761	0.2638
	1.759	0.2638
	1.759	0.2638
	1.755	0.2635
	1.749	0.2634
	1.748	0.2631
	1.741	0.2627
	1.741	0.2626
	1.74	0.2626
	1.737	0.2625
	1.736	0.2623
	1.735	0.2623
	1.734	0.2622
	1.732	0.2621
	1.73	0.2621
	1.729	0.262
	1.728	0.262
	1.725	0.262
	1.723	0.2618
	1.72	0.2609
	1.72	0.2607
	1.72	0.26
	1.72	0.2599
	1.72	0.2597
	1.72	0.2596
	1.72	0.2594
	1.72	0.2593
	1.72	0.2593
	1.72	0.2592
	1.72	0.2592
	1.72	0.259
	1.72	0.2589
	1.72	0.2588
	1.72	0.2588
	1.719	0.2586
	1.719	0.2584
	1.719	0.2583
	1.719	0.258
	1.719	0.258
	1.719	0.258
	1.719	0.258
	1.719	0.258
	1.719	0.258
	1.719	0.2579
	1.719	0.2579
	1.718	0.2579
	1.717	0.2579
	1.715	0.2579
	1.71	0.2579
	1.704	0.2579
	1.702	0.2579
	1.701	0.2579
	1.699	0.2579
	1.699	0.2579
	1.699	0.2579
	1.695	0.2579
	1.691	0.2579
	1.69	0.2579
	1.689	0.2578
	1.682	0.2578
	1.678	0.2575
	1.677	0.2575
	1.677	0.2574
	1.677	0.2574
	1.674	0.257
	1.671	0.257
	1.669	0.257
	1.667	0.257
	1.662	0.2568
	1.662	0.2566
	1.658	0.2565
	1.658	0.2565
	1.657	0.2562
	1.654	0.256
	1.654	0.2558
	1.654	0.2555
	1.652	0.2555
	1.652	0.2553
	1.652	0.2551
	1.651	0.255
	1.651	0.2549
	1.651	0.2548
	1.65	0.2545
	1.649	0.2543
	1.648	0.2542
	1.647	0.2542
	1.645	0.2541
	1.641	0.254
	1.641	0.2539
	1.64	0.2539
	1.636	0.2535
	1.636	0.253
	1.632	0.253
	1.632	0.2529
	1.632	0.2529
	1.631	0.2528
	1.629	0.2527
	1.628	0.252
	1.628	0.2519
	1.627	0.2517
	1.627	0.2513
	1.623	0.2512
	1.622	0.2512
	1.62	0.2507
	1.619	0.2506
	1.619	0.2504
	1.618	0.2501
	1.612	0.2501
	1.611	0.2499
	1.608	0.2498
	1.608	0.2497
	1.607	0.2496
	1.605	0.2486
	1.604	0.2484
	1.603	0.248
	1.602	0.248
	1.601	0.248
	1.601	0.2479
	1.601	0.2477
	1.599	0.2475
	1.597	0.2473
	1.596	0.2472
	1.59	0.247
	1.589	0.247
	1.588	0.2469
	1.588	0.2468
	1.588	0.2465
	1.587	0.2465
	1.587	0.2465
	1.587	0.2465
	1.587	0.2464
	1.586	0.2463
	1.586	0.2463
	1.584	0.2461
	1.582	0.2456
	1.58	0.2455
	1.579	0.2452
	1.572	0.2451
	1.571	0.245
	1.569	0.2449
	1.569	0.2448
	1.567	0.2445
	1.564	0.2444
	1.562	0.2443
	1.557	0.2441
	1.557	0.244
	1.556	0.2437
	1.556	0.2436
	1.553	0.2435
	1.552	0.2434
	1.55	0.2432
	1.549	0.2431
	1.547	0.2431
	1.546	0.243
	1.542	0.2428
	1.541	0.2421
	1.538	0.242
	1.535	0.2419
	1.533	0.2419
	1.533	0.2418
	1.532	0.2418
	1.529	0.2418
	1.526	0.2418
	1.525	0.2418
	1.524	0.2418
	1.521	0.2418
	1.521	0.2417
	1.521	0.2415
	1.518	0.2415
	1.518	0.2414
	1.518	0.2414
	1.517	0.2413
	1.516	0.2412
	1.514	0.241
	1.513	0.241
	1.512	0.2409
	1.509	0.2405
	1.508	0.2405
	1.507	0.2404
	1.507	0.2404
	1.506	0.2404
	1.505	0.2404
	1.504	0.2404
	1.503	0.2404
	1.501	0.2404
	1.497	0.2404
	1.496	0.2404
	1.495	0.2404
	1.495	0.2404
	1.494	0.2404
	1.491	0.2404
	1.49	0.2404
	1.49	0.2403
	1.488	0.2403
	1.488	0.2403
	1.487	0.2403
	1.483	0.2403
	1.48	0.2402
	1.48	0.2401
	1.476	0.24
	1.474	0.24
	1.474	0.24
	1.474	0.24
	1.474	0.2399
	1.47	0.2399
	1.468	0.2399
	1.467	0.2396
	1.466	0.2395
	1.466	0.239
	1.466	0.239
	1.462	0.2388
	1.459	0.2386
	1.458	0.2386
	1.451	0.2385
	1.449	0.2385
	1.449	0.2384
	1.448	0.2378
	1.444	0.2376
[truncated: 2,048 more rows]
