# Supplementary material for: Activated αIIbβ3 on platelets mediates flow-dependent NETosis via SLC44A2
Source: eLife. 2020 Apr 21;9:e53353. doi: 10.7554/eLife.53353 (PMC7253179; doi:10.7554/eLife.53353)
Supplement: Figure 2—source data 1. [file elife-53353-fig2-data1.xlsx]

## Sheet: Figure 2c - Platelet aggreg
	Ctrl aggregates													No aggregates with Epti and GR144053
No of aggregates	Time (s)	A1* (1)	A1* (2)	A1* (3)	A1* (4)	FL-VWF (1)	FL-VWF (2)	FL-VWF (3)	A1 (1)	A1 (2)	A1 (3)			Time (s)	Eptifibatide (1)	Eptifibatide (2)	Eptifibatide (3)	GR144053 (1)	GR144053 (2)	GR144053 (3)	GR144053 (4)	Plasma-free 1	Plasma-free 2	Plasma-free 3
	0	--	--	--	--	--	--	--	--	--	--			0	--	--	--	--	--	--	--	0	0	0
	5	--	0	--	0	--	--	--	--	--	--			5	0	--	0	0	0	--	0	--	1	1
	10	0	0	6	0	--	--	0	0	0	0			10	0	0	0	0	0	0	0	0	3	1
	15	0	0	2	0	--	4	0	0	1	0			15	0	0	0	0	0	0	0	1	6	1
	20	0	0	7	2	2	4	0	0	0	1			20	0	1	1	0	0	0	0	0	8	1
	25	1	0	7	2	4	3	0	0	2	0			25	0	1	1	1	0	0	0	3	11	1
	30	1	0	8	4	4	6	0	0	4	0			30	0	2	1	0	0	0	0	3	20	1
	35	1	1	12	4	5	11	2	0	51	0			35	0	3	1	0	0	0	0	4	24	2
	40	2	1	16	5	8	11	1	0	83	4			40	0	3	1	1	0	0	1	7	34	4
	45	3	2	25	8	12	18	3	0	98	5			45	0	4	3	2	0	0	1	7	36	3
	50	3	2	35	11	20	39	5	1	86	9			50	0	3	3	3	1	0	0	17	37	5
	55	4	4	44	15	24	62	5	2	91	12			55	0	3	4	3	0	0	1	20	46	4
	60	12	5	35	18	39	84	7	5	104	11			60	0	6	5	9	0	0	1	24	49	7
	65	23	6	54	38	55	122	10	5	120	19			65	0	8	7	16	0	0	2	30	49	9
	70	29	13	79	43	79	143	16	5	141	26			70	0	10	5	10	0	3	2	27	59	10
	75	51	19	93	65	109	161	31	7	154	33			75	1	8	4	16	0	1	2	29	70	15
	80	124	36	126	98	169	181	46	10	174	40			80	0	11	7	28	0	3	2	38	62	17
	85	189	66	161	133	166	214	60	20	195	72			85	1	15	18	25	0	2	3	42	82	20
	90	248	108	186	149	214	273	91	53	223	92			90	2	16	12	36	0	4	2	46	86	26
	95	339	142	211	206	254	273	132	80	247	110			95	3	21	13	45	0	4	4	54	88	37
	100	391	207	248	257	295	309	144	108	280	188			100	6	19	14	54	0	5	7	62	102	37
	105	462	280	263	292	347	347	167	142	292	248			105	2	18	12	61	0	14	8	69	71	49
	110	485	338	302	377	402	354	194	179	310	284			110	5	23	22	64	0	20	7	75	98	55
	115	527	394	315	402	470	360	204	229	332	319			115	11	36	17	68	0	24	10	71	92	57
	120	489	442	349	459	507	390	257	240	357	378			120	8	54	21	86	0	22	11	73	98	60
	125	478	489	376	514	470	424	286	255	384	422			125	12	62	17	72	0	35	11	70	106	68
	130	457	511	420	557	580	422	335	297	403	454			130	12	59	30	120	3	30	13	73	103	80
	135	444	526	436	572	606	419	359	322	411	482			135	19	76	42	141	0	41	16	90	111	75
	140	447	519	451	636	608	444	397	351	418	496			140	12	74	44	136	2	46	21	89	114	86
	145	428	512	470	666	595	448	443	367	430	477			145	17	89	57	132	0	32	20	100	121	94
	150	412	492	492	682	594	467	479	382	438				150	21	90	122	114	0	51	28	88	117	101
	155	402	502	514	691	565	476	503	397	445				155	89	94	108	122	2	77	37	102	115	103
	160	373	466	511	706	565	491	510	399	453				160	25	128	61	125	1	80	39	100	130	109
	165	375	422	538	696		477	525	413	453				165	42	99	69	119	3	105	42	96	126	126
	170	359	353	544	692		498	546	414	454				170	50	132	88	113	4	110	42	108	130	127
														175	48	138	94	94	6	119	63	101	138	146
Note the data presented in Fig 2c-e are derived from the data presented in Fig 2b
