# Supplementary material for: Activated αIIbβ3 on platelets mediates flow-dependent NETosis via SLC44A2
Source: eLife. 2020 Apr 21;9:e53353. doi: 10.7554/eLife.53353 (PMC7253179; doi:10.7554/eLife.53353)
Supplement: Figure 3—figure supplement 1—source data 1. [file elife-53353-fig3-figsupp1-data1.xlsx]

## Sheet: Fig 3 - Supp 1
Fig 3 - Fig supp 1C			Fig 3 - Fig supp 1D
Collagen/WB	Collagen/WB+Psel block		WB ctrl	Psel blocker
30.4	0.4		0.2146	0
21	3		6.885	188.9
52	6		40.01	1.954
			0.1921	29.72
			0.5079	57.58
			4.502	76.19
			11.38	53.56
			19.18	35.57
			12	53.84
			8.294	38.2
			16.53	41.12
			2.517	49.26
			13.92	40.66
			15.56	13.67
			10.06	17.96
			19.39	4.084
			23.85	43.29
			20.29	72.49
			0.6447	27.74
			0.4698	86.76
			1.02	23.58
			2.38	73.41
			11.99	0.3394
			9.868	20.04
			25.08	5.769
			9.347	12.39
			12.08	38.54
			0	21.95
			11	1.806
			18.79	27.39
			10.89	0.5276
			3.707	32.61
			3.106	20.69
			32.89	0.2345
			52.76	30.15
			9.524	0.04606
			0	39.62
			29.7	29.41
			0.1761	18.07
			41.53	44.3
			30.51	26.12
			43.44	38.87
			2.961	29.25
			13.35	99.7
			12.44	18.37
			2.697	10.11
			0.3795	0
			2.692	0
			0	0.4003
			12.54	0.3858
			3.927	0.3426
			26.84	0.4867
			2.197	58.18
			14.24	28.44
			21.21	0.4933
			0	2.342
				4.922
				13.45
