# Supplementary material for: Activated αIIbβ3 on platelets mediates flow-dependent NETosis via SLC44A2
Source: eLife. 2020 Apr 21;9:e53353. doi: 10.7554/eLife.53353 (PMC7253179; doi:10.7554/eLife.53353)
Supplement: Figure 3—source data 1. [file elife-53353-fig3-data1.xlsx]

## Sheet: Figure 3 - Leukocyte binding
Fig 3A				Fig 3B						Fig 3C				Fig 3D				Fig 3E					Fig 3F	velocity
VWF WB	PECAM-1 WB	VWF WB + aIIbb3 block		VWF WB	VWF PFB	anti-PECAM PFB	VWF PFB + Fbg	VWF PFB + aIIbb3 block		A1*	A1*+Fbg	A1*+aIIbb3 block		anti-PECAM	anti-PECAM+LIBS2	anti-PECAM+LIBS2+aIIbb3		VWF WB	VWF WB+Psel block	VWF PFB	VWF PFB+Psel block		VWF PFB	VWF PFB+Psel block
3	0.2	1.2		3	5.77	0.5	3.46	4.11		4.85	1.31	0.62		0.64	2.17	1.41		3	3.2	5.77	2.85		5.686	36.54
2	0	1.8		2	5.38	0.4	3.62	6.23		7	2.31	2.5		0.22	1.82	0.62		2	5.4	5.38	14.69		4.269	34.98
5	0	2		5	12	0.38	0.38	0.58		4.85	1.85	4.1		0.8	1.55	0.33		5	5.6	12	20.54		3.984	45.7
2.4		1.2		2.4	7			1.23		7.77		0.31		1.33	4.28	2		2.4		7	17.54		3.453	21.46
5.2		2.4		5.2	6					2.31				0.5	4.5	2		5.2		6			4.718	43.68
1				1	13.31					7.08				0.67	3.82			1		13.31			3.797	38.37
3				3	8.31					2.46								3		8.31			5.113	27.03
1.67				1.67	7					4.77								1.67		7			15.49	23.29
8.44				8.44	8.62					7								8.44		8.62			2.069	35.27
3.2				3.2	6.77					7								3.2		6.77			5.197	25.38
2.2				2.2	12.08					4.46								2.2		12.08			4.347	22.23
3.8				3.8														3.8					5.025	26.45
																							5.204	28.99
																							6.98	17.99
																							22.4	25.37
																							5.429	27.65
																							7.268	21.25
																							6.405	28.17
																							5.735	14.97
																							5.9	78.08
																							20.66	22.47
																							65.14	30.39
																							5.697	27.02
																							4.726	28.22
																							14	37.14
																							6.672	7.807
																							21.93	17.01
																							8.55	27.84
																							6.145	20.34
																							28.15	34.36
																							43.79	26.77
																							6.624	19.68
																							3.584	34.18
																							22.68	38.79
																							2.866	31.54
																							4.338	26.24
																							5.459	67.9
																							8.417	41.51
																							8.147	0.1128
																							9.232	31.75
																							5.541	25.32
																							4.447	63.6
																							4.335	23.33
																							0	19.21
																							5.681	9.391
																							10.2	28.75
																							7.13	31.34
																							34.32	27.31
																							7.414	17.5
																							1.865	46.74
																							12.89	23.95
																							6.108	18.33
																							12.5	47.61
																							11.67	56.95
																							16.34	44.3
																							3.674	17.81
																							4.029	32.73
																							10.44	0
																							5.802	54
																							6.999	37.05
																							6.949	11.93
																							5.953	45.74
																							24.03	26.17
																							14.54	22.7
																							27.05	31.84
																							2.139	12.2
																							5.581	32.97
																							5.848	33.65
																							3.096	50.45
																							3.42	29.92
																							5.61	38.97
																							2.694	19.33
																							6.772	22.89
																							0.1402	25.98
																							3.896	25.26
																							0.8592	18.65
																							5.019	31.39
																							5.792	27.6
																							0.1289	38.04
																							14.01	37.89
																							0.9291	36.77
																							9.306	21.16
																							6.899	23.6
																							2.22	35.45
																							7.396	46.5
																							4.456	41.36
																							5.858	23.03
																							46.89	37.64
																							43.34	21.31
																							57.29	71.37
																							10.13	35.96
																							6.063	29.21
																							4.681	50.94
																							3.291	27.46
																							3.186	37.12
																							2.526	72.34
																							4.186	10.64
																							4.637	23.25
																							9.384	27.14
																							19.16	23.06
																							7.708	37.47
																							8.239	27.76
																							4.512	16.6
																							3.796	0.129
																							5.092	30.19
																							5.43	24.72
																							4.619	48.25
																							9.661	38.54
																							21.08	101.5
																							5.959	26.58
																							8.814	58.76
																							10.66	41.83
																							2.536	10.33
																							4.553	47.58
																							2.852	73.51
																							4.751	54.14
																							3.594	30.59
																							6.677	15.72
																							5.778	44.73
																							5.725	12.83
																							2.836	39.19
																								23.95
																								17.62
																								21.23
																								26.87
																								0
																								27.16
																								28.16
																								64.26
																								13.86
																								0
																								31.96
																								25.86
																								23.98
																								104.4
																								0
																								12.45
																								5.92
																								44.13
																								0
																								76.96
																								15.19
																								14.65
																								15.34
																								13.43
																								94.67
																								38.02
																								26.17
																								16.89
																								42.45
																								30.37
																								23.56
																								15.09
																								53.01
																								15.53
																								1.377
																								50.53
																								3.971
																								26.64
																								28.09
																								21.3
																								18.25
																								17.69
																								9.715
																								3.406
																								21.47
																								22.41
																								3.255
																								28.51
																								18.5
																								58.79
																								18.23
																								14.52
																								24.04
																								25.15
																								33.5
																								15.71
																								34.23
