# Supplementary material for: Activated αIIbβ3 on platelets mediates flow-dependent NETosis via SLC44A2
Source: eLife. 2020 Apr 21;9:e53353. doi: 10.7554/eLife.53353 (PMC7253179; doi:10.7554/eLife.53353)
Supplement: Figure 4—source data 1. [file elife-53353-fig4-data1.xlsx]

## Sheet: Figure 4 - PMN on aIIbb3
Fig 4B								Fig 4C
Ctrl	BSA	aIIbb3 block	Fbg		LIBS2/aIIbb3	LIBS2/aIIbb3 + aIIBb3 block		FL-VWF	FL-VWF + b2-block
100	0	6.42	30.3		100	16.8		6.15	13.69
100	2.17	13.89	10.26		100	31		4	3.9
100	10.25	16.67	32.86		100	38.5		4.85	5.38
								5.77	12
								5.38	13
								12
								7
								6
								13.31
								8.31
								7
								8.62
								6.77
								12.08
								15.4
								12.8
