# Supplementary material for: Activated αIIbβ3 on platelets mediates flow-dependent NETosis via SLC44A2
Source: eLife. 2020 Apr 21;9:e53353. doi: 10.7554/eLife.53353 (PMC7253179; doi:10.7554/eLife.53353)
Supplement: Figure 5—source data 1. [file elife-53353-fig5-data1.xlsx]

## Sheet: Figure 5c - PMN Ca2+ sig
Note that data in Fig 5d are derived from the data in Fig 5c
Ca2+ assay neutrophils	aIIb3 channels																									Max					FL-VWF platelets										Max					anti-CD16
	Mean Intensity (ADU), ch1:FITC	Exp 1										Exp 2				Exp 3										297.038					Mean Intensity (ADU), ch1:FITC										672.045					Mean Intensity (ADU), ch1:FITC
	TimePoint	Object - 0 Mean Intensity (ADU), ch1:FITC	Object - 0 Mean Intensity (ADU), ch1:FITC	Object - 0 Mean Intensity (ADU), ch1:FITC	Object - 0 Mean Intensity (ADU), ch1:FITC	Object - 0 Mean Intensity (ADU), ch1:FITC	Object - 0 Mean Intensity (ADU), ch1:FITC	Object - 0 Mean Intensity (ADU), ch1:FITC	Object - 0 Mean Intensity (ADU), ch1:FITC	Object - 0 Mean Intensity (ADU), ch1:FITC	Object - 0 Mean Intensity (ADU), ch1:FITC	Object - 0 Mean Intensity (ADU), ch1:FITC	Object - 0 Mean Intensity (ADU), ch1:FITC	Object - 0 Mean Intensity (ADU), ch1:FITC	Object - 0 Mean Intensity (ADU), ch1:FITC	Object - 0 Mean Intensity (ADU), ch1:FITC	Object - 0 Mean Intensity (ADU), ch1:FITC	Object - 0 Mean Intensity (ADU), ch1:FITC	Object - 0 Mean Intensity (ADU), ch1:FITC	Object - 0 Mean Intensity (ADU), ch1:FITC	Object - 0 Mean Intensity (ADU), ch1:FITC	Object - 0 Mean Intensity (ADU), ch1:FITC	Object - 0 Mean Intensity (ADU), ch1:FITC	Object - 0 Mean Intensity (ADU), ch1:FITC	Object - 0 Mean Intensity (ADU), ch1:FITC	Mean	Baseline	%			TimePoint	Object - 0 Mean Intensity (ADU), ch1:FITC	Object - 0 Mean Intensity (ADU), ch1:FITC	Object - 0 Mean Intensity (ADU), ch1:FITC	Object - 0 Mean Intensity (ADU), ch1:FITC	Object - 0 Mean Intensity (ADU), ch1:FITC	Object - 1 Mean Intensity (ADU), ch1:FITC	Object - 2 Mean Intensity (ADU), ch1:FITC	Object - 0 Mean Intensity (ADU), ch1:FITC	Object - 0 Mean Intensity (ADU), ch1:FITC	Baseline		%			TimePoint	Object - 0 Mean Intensity (ADU), ch1:FITC	Object - 0 Mean Intensity (ADU), ch1:FITC	Object - 0 Mean Intensity (ADU), ch1:FITC
	0	917.5	1026.25	970.25	950.33	894.42	1123.58	760.17	834.83	900.17	825.33	805.67	845.42	878.83	759.83	976.75	932.83	743.33	949.5	1193.25	1068.42	979	1033.75	818.83	657.83	910.253	0.00291667	0.00098191			0	958.42	774.19	1117.33	731.75	880.25	777.42	775.58	1008.08	1076.08	811.083	0.00333333	0.000495995			0	801.42	959.5	1916.83
	1	916	1025.58	1328.5	931	855.25	1107.5	786.92	840.75	883.25	813.92	813.75	838.67	878.08	788.17	959.5	928	746.83	944.08	1186	1055.33	983.33	1051.42	810.17	665.08	922.378	12.1283	4.08306			1	947.25	766.67	1155.5	779.17	860.92	766.25	808.83	1015.33	1076.33	812	0.92	0.136895			1	795.17	935.67	1955.75
	2	915.75	1024.17	987.83	943	853.42	1100.75	801.75	842.5	895.92	821.75	804.5	831.58	877.42	781.75	959.42	930.17	745.08	951.67	1194.17	1053.17	972.17	1059.58	824.58	664.25	909.848	-0.402083	-0.135363			2	942.67	788.42	1135.25	777.25	846.33	788.42	810.08	1016.92	1061	814.943	3.86333	0.574858			2	795.42	933.5	1972.33
	3	927.75	1015.58	998.5	926.92	850.58	1113.83	801.08	836.42	905.92	829.08	813.33	831.92	872.5	777.25	954.75	936.75	733.42	945	1191.33	935.25	987.17	1051.83	815.33	677.25	905.364	-4.88583	-1.64484			3	918.92	802	1124.83	779.67	860.67	783.67	812.67	1011	1086.25	819.003	7.92333	1.17898			3	796.75	993.17	1948.83
	4	927.08	1026.42	994.75	922.17	843.92	1107.25	808.58	829.92	891.92	828.83	807.5	844.83	865.67	774.83	965.58	929.83	726.58	937.67	1187.83	1041.08	987.92	1055.67	809.67	682.42	908.247	-2.00333	-0.674432			4	474.08	760	1107.17	775.17	849.67	790.58	822.08	1003.17	1075.58	820.777	9.69667	1.44285			4	807.33	991.92	1950.42
	5	941.58	1012.75	987.75	881.08	895.83	1103.42	422.17	828.83	896.58	819.58	811.33	835.83	857.58	767.67	961.83	915.08	728.75	948	1199.67	1028.33	970.83	1058.75	807.58	681.5	890.096	-20.1542	-6.785			5	865.25	749.92	1132.75	857.17	866.92	777.42	816.75	1001.08	1082.75	820.363	9.28333	1.38135			5	795.5	983.25	1943.67
	6	935.75	1006.33	982.92	904.08	890.25	1094.83	822.25	832.08	899.67	814	725.83	839.08	867.83	772.58	957.67	909.83	726.92	954.92	1179.17	1044.25	983.75	1059.5	811.17	687.33	904.25	-6.00042	-2.02007			6	904.67	429.58	1050	862.08	858	773.67	816.08	1016.5	1084.33	815.917	4.83667	0.719689			6	787.92	995.42	1928
	7	928.5	1006.5	988.5	891.17	892.25	1077.58	815.17	820.83	898.83	820.75	738.92	846.17	864.75	778	958.08	917.75	753.92	948.5	1202.92	1037.33	981.83	1064.5	820.67	694.92	906.181	-4.06917	-1.36991			7	896.67	432.08	1013.08	771.25	852.17	775	842.5	1024.58	1066.5	823.223	12.1433	1.80691			7	797.92	980	1941.42
	8	930.25	1006.33	992.42	900.83	875.25	1060.83	833.67	819.08	899.83	829.83	732.75	834.5	869.75	773.42	968.17	899.58	750.92	939.33	1183.75	1024.75	964.17	1054.17	804.92	694.42	901.788	-8.46167	-2.84866			8	918.5	803.58	993	763	847.42	771.42	836.75	1014.08	1080.5	818.53	7.45	1.10855			8	799.08	983.08	1941.83
	9	931.33	1003.17	972.08	890.67	882.17	1046.33	830.17	813	891.17	821.83	725.67	834.83	872.58	772	985.17	925	755	946	1175.42	1050.08	964.83	1062.25	791.58	708.83	902.132	-8.11833	-2.73308			9	903.25	763.75	1009.25	764.17	803.5	763.92	843.5	999.33	1078.58	803.64	-7.44	-1.10706			9	800.17	965.42	1929.42
	10	938	1004.92	978.75	890.5	797.42	1077.83	825.17	811.17	885.58	827.75	783.42	842.67	868.33	774.58	983.08	925.58	745.25	961.33	1174.33	1062.83	968.67	1066.92	812.58	714.5	905.048	-5.20167	-1.75117			10	902.75	772.83	1102.58	781.83	830.33	769.92	829.25	1015.5	1100.42	809.833	-1.24667	-0.185502			10	806.92	986.42	1940.83
	11	932.42	1008.42	979.08	916.67	880.5	1076.83	822	821.83	900.08	821.83	785.33	844.75	863	784.75	956	933.17	768.83	949.25	1164.08	1045.83	949.83	1057.75	806.33	704.92	907.228	-3.02167	-1.01726			11	900.83	763.5	1087.33	769.67	825.75	777.25	837.17	997	1081.58	813.39	2.31	0.343724			11	804.17	954.25	1918.33
	12	924.33	985	974.17	933.17	885.92	1091.17	818	823.42	911.58	816.42	799.42	846.67	853.75	773.17	950.58	918.08	773.08	936	1142.25	1046.58	946	1048.75	801	702.58	904.212	-6.03792	-2.03269			12	905.25	769.67	1094.83	803.92	828.5	775.67	836.75	1001	1091.67	813.64	2.56	0.380924			12	791.67	966.33	1906.67
	13	937.17	990.17	981.17	918.67	828.75	1069.5	820.83	817.33	896.67	829.67	783.08	831	868.75	779.42	964.33	944.08	764.25	944.17	1155.42	1040.17	952.83	1048.33	873.33	699.75	905.785	-4.465	-1.50316			13	912.92	770.33	1099	844.75	833.5	766.42	862.17	1000.25	1078.33	820.697	9.61667	1.43095			13	799.33	955.5	1904.58
	14	937.08	998.58	989.67	914.33	883.58	1072.58	808.25	808	913.25	821.5	803.42	842.17	870.08	776.17	940.58	929.75	792.67	949.75	1146	1048.25	965.42	1065.17	802.83	694.08	907.215	-3.035	-1.02175			14	933.25	780.08	1097.17	778.83	820	776.5	866.17	1008.83	1090.17	820.89	9.81	1.45971			14	807.33	946.5	1915.75
	15	947.33	995.5	987.83	917	919.58	1071.08	813.17	808.67	898.17	821.25	805.17	834.42	875.75	766.5	960.42	932.08	709.08	925.5	1132	1033.67	953.58	1050.5	806.08	690.75	902.295	-7.955	-2.67809			15	929.08	772.33	1092.67	796.25	842	767	856.92	1008.83	1135.33	821.973	10.8933	1.62091			15	793.67	954.42	1920.17
	16	930.25	991.33	978.33	923.33	901.33	1078.5	806.92	816.5	899.67	825.75	801.58	849.58	868.17	787.25	959.75	918.58	711.92	930.42	1142.92	1042.17	958.92	1067.67	795.75	685.25	902.993	-7.25667	-2.44299			16	907.42	780.83	1123.67	789.17	815.75	755.67	862.08	1004.17	1117.58	869.268	58.188	8.65828			16	790.08	969.67	1911.08
	17	934.25	1010.58	970.67	930.17	907.5	1075	807.5	828.75	892.25	822.67	808.17	847.58	890.58	798.75	962.92	916.58	723	923.67	1134.67	1032.75	953.25	1078.5	824.92	683.08	906.573	-3.67667	-1.23777			17	935	770.67	1107	846.5	824.83	755.42	854.83	1006.42	1121.67	877.716	66.636	9.91533			17	801.5	969.33	1893.58
	18	940.17	999.42	984.5	924	910.08	1058.33	800.33	815.25	891	825.42	815	838.58	871.42	779.08	956.58	909.67	704.5	951.67	1137.58	1059.08	946.67	1074.25	820.83	652.92	902.764	-7.48625	-2.52028			18	926.5	780.25	1115.08	854.58	822.75	774.83	857	1003.58	1113.83	884.848	73.768	10.9766			18	795.42	954.17	1875.25
	19	932.25	1000.83	976	938.17	918.25	1071.92	799.58	812.75	876.58	827.42	795.17	837.25	866.83	790.58	967.58	901.75	702.33	953.42	1128.83	1049.25	947.75	1069.75	816.83	641.92	900.958	-9.29208	-3.12823			19	945.5	764.58	1127	863.92	825.17	765.58	846.58	986.92	1119.92	885.65	74.57	11.0959			19	796.25	944.67	1879.33
	20	944.25	991.83	991.83	948.08	914.58	1073.92	796.67	813.5	871.83	834.58	805.42	838.75	869.5	782.42	959.17	915.5	713.92	958.67	1133	1023.5	954.58	1061.42	798.42	644.67	901.667	-8.58292	-2.88948			20	925.5	766.5	1132.92	902.5	822.75	764.75	860.17	1018.5	1117.83	896.618	85.538	12.7279			20	788.25	936.42	1858.83
	21	942.75	986	986.25	933	913.67	1054.83	783.5	807.25	880.17	812.17	829.83	846.42	870.08	788.67	953.58	898.75	719	952.42	1114.67	1040	949.25	1070.08	810.75	652	899.795	-10.4546	-3.51959			21	932.58	761.17	1141.25	904.75	824.33	761.42	875.42	1019.5	1121.42	901.434	90.354	13.4445			21	788.17	948.75	1859.92
	22	948.92	980.25	975.75	935.58	915.75	1048.17	790.33	814.83	900	808.17	822	834.08	875.58	785.5	960.5	895.33	729.58	945.83	1126.92	1028.08	960.33	1084	802	664.75	901.343	-8.90708	-2.99861			22	957.08	774.33	1120.58	778	818.75	757.58	876.33	1013.58	1112.08	870.248	59.168	8.80411			22	790.75	951.17	1848.67
	23	943.5	977.83	971.33	949.17	922.92	1060.58	781.42	814.5	902.58	828.08	823.08	842.83	868.83	783.08	944.17	889.17	721.67	959	1114.17	1039	955.75	1057.42	796.75	646.67	899.729	-10.5208	-3.54189			23	941.58	754.5	1118.5	773.17	820.83	756.5	892.75	1015.33	1117.08	872.35	61.27	9.11688			23	797.92	945.25	1839.58
	24	936.67	965.92	969.08	951.33	919.33	1055.17	775.42	804.42	882.92	812.58	814.33	847.83	874.17	764.33	958.75	876.75	737.83	944.75	1115.83	1033.58	964.17	1075.58	806.5	653.25	897.52	-12.7296	-4.28548			24	946	762.67	1128	773.33	815.83	757.5	883.08	1004	1115.25	871.548	60.468	8.99754			24	790.08	935.42	1837.25
	25	953.58	971.17	969.25	960.75	887.33	1071.83	781.42	817.58	891.75	842.33	818.5	842.25	875.67	770.75	987.67	905.33	726.25	954.17	1103.83	1028.42	948.58	1059.25	814.17	655.92	901.573	-8.67708	-2.92118			25	950.08	763.25	1117.83	773.33	819	750.25	865.5	1024.75	1118.17	865.182	54.102	8.05029			25	790.75	940.08	1833.67
	26	944.92	961.58	977.42	952.08	890.58	1045.92	783.17	815.58	891.33	840.17	832.75	835.33	874.25	772.75	962.42	903.75	746.33	950	1103.25	1045.08	947.92	1078.58	801.67	704.58	902.559	-7.69125	-2.5893			26	939.75	760.08	1133.25	767.75	816.25	737.5	859.08	1000.83	1140	862.766	51.686	7.6908			26	797.67	941.33	1840.5
	27	951.67	971.33	971.92	960.25	885.92	1038.42	770.5	820.17	896.75	831.75	828.83	851.83	879.67	769.42	943.58	911.67	722.75	951.5	1107.33	1036	941	1081	803.58	652	899.118	-11.1317	-3.74753			27	947.92	764.25	1117.33	781	811.58	730.75	867.83	1004.83	1109.17	861.698	50.618	7.53188			27	806.92	929.92	1824
	28	936.17	970.83	977.58	970.5	899.67	1037.5	766.92	825.5	896	839.33	830.08	857.58	882.33	751.58	908	888	736.42	944.67	1108.08	1045.08	952.5	1083.17	810.67	632	897.923	-12.3267	-4.14983			28	944.75	765.42	1127.75	782.17	821.75	736.08	869.67	1013.5	1118.92	867.484	56.404	8.39283			28	790.83	937.75	1827.17
	29	948.5	978.25	991.67	974.58	913.33	1032.5	760.58	797.92	903.67	836.83	842.5	850.42	879	768.17	905.58	910.67	743.75	925.33	1097.75	1050.75	940.58	1091.58	807.25	654.58	900.239	-10.0108	-3.3702			29	936.92	748.33	1129.42	781.58	829.08	738.17	886.25	1003.92	1106.5	872.9	61.82	9.19872			29	794.08	948.67	1809.25
	30	941.17	974.25	983.92	981.17	895.17	1024.75	776.25	815.08	889.17	816.42	841.58	848.92	897.08	770.5	891.17	895.25	739.17	941.5	1133.58	1042.75	931.25	1111.17	801.75	649.25	899.678	-10.5721	-3.55914			30	923.67	758.08	1127.33	767.67	818.83	723.58	809.33	1006.08	1114.92	849.348	38.268	5.69422			30	793.08	919.92	1791.75
	31	946.67	970.33	971.17	989.5	904.17	1031.75	776	813.17	890.08	848.25	856.42	847.08	868.92	766.33	886.17	905.67	734.5	916	1107.83	1049.83	940.83	1116.42	797.08	641.92	899.004	-11.2462	-3.78611			31	936.5	767.42	1119	773.58	806.08	732.42	824.92	989.17	1122.08	851.2	40.12	5.96979			31	795.75	939	1814.83
	32	944.5	964.83	997.58	989	905.75	1035	772.67	823.33	917.33	832	849.92	861.75	868.33	770.25	889	902.67	740	915.58	1102.42	1057.33	939.83	1132.42	801.5	651.92	902.705	-7.54542	-2.5402			32	945.33	758.67	1126.25	783.83	813.67	738.33	821.5	1008.17	1131.33	856.716	45.636	6.79057			32	788.17	940.67	1790.17
	33	935.25	962.5	984.25	1002.58	903.5	1019.83	756.75	826.75	919.17	809.08	863.75	856.08	865.42	759.08	891.75	901.17	736.42	924.75	1079.92	1064.83	932.83	1149.5	806.08	635.17	899.434	-10.8162	-3.64134			33	938.5	764.75	1114.75	783.25	806.58	730.33	831.33	1010.5	1129.42	853.248	42.168	6.27453			33	802.17	949.83	1805.25
	34	940.25	951.58	996.83	996.33	918	1020.08	759.25	821.92	916	810.67	866.67	862.17	886.92	754.67	886.92	895.17	756.67	906.92	1091	1072.33	930.33	1152.42	797.83	639.33	901.261	-8.98917	-3.02625			34	930.33	751.58	1110.75	793.25	802.08	712.58	956.33	1003	1138.67	874.998	63.918	9.5109			34	802.17	960.58	1790.08
	35	946.75	953.08	992.42	1002.42	910	1008.92	756.08	828.17	893.83	824.5	860	864.58	871.83	772	880.25	894.5	730.5	911.92	1084.83	1051.42	917.92	1139.5	798.83	637.33	897.149	-13.1008	-4.41046			35	931	759.42	1113.42	775.33	783.25	718.25	830.67	1120.67	1134.25	844.184	33.104	4.92582			35	793.58	977.17	1807.25
	36	928.75	953.17	978.75	999.75	918.08	1048.67	752.92	817.58	895	807.83	874.08	852.33	870	766.75	892.33	900.25	730.08	900.75	1091.08	1059.5	904.08	1172.75	801.75	633.58	897.909	-12.3412	-4.15474			36	927.83	757.67	1089.08	779.08	792.33	725.75	837.67	1018.75	1143	844.782	33.702	5.01481			36	795.25	966.42	1772.25
	37	944.25	965.08	1002.25	999.33	912.58	1050.08	755.42	814.5	912.67	838.25	862.33	859.92	878.33	761.75	868.17	899.25	733.25	900.25	1099.17	1034.17	907.08	1133.58	799.92	637.58	898.715	-11.535	-3.88332			37	921.33	758.42	1084.33	777.5	795.17	729.08	834.5	996.25	1117.67	844.116	33.036	4.91571			37	788.5	956.92	1789.67
	38	934.83	977.25	982.08	1009	916.42	1040.25	762.83	827.25	903.67	838.42	878	861.58	876.5	754.17	851.83	899.75	730	909.17	1077.83	1058.42	916.83	1151.75	800.58	629.58	899.5	-10.7504	-3.61918			38	908.17	757.83	1291.75	767.67	807.5	735.42	855.58	995.58	1119	891.584	80.504	11.9789			38	801.67	949.75	1772.58
	39	976.33	957	998	1011.08	922.25	1035.75	750.5	832.83	921.92	844.67	884.33	856.83	881.58	754.67	872.92	898.17	729.08	895.83	1088.67	1042.33	864.42	1153.75	790.67	629.25	899.701	-10.5488	-3.55129			39	900.25	764.5	1092.5	774.42	802.33	735.67	860.17	998.42	1124.83	853.018	41.938	6.24031			39	795.67	959.33	1767.25
	40	926.33	959.92	978.17	1011.83	927.25	1032.17	776.25	832.17	905.58	843	886	850.33	873.25	758.75	877.5	893.33	718.08	895.33	1094.25	1046.25	912.17	1206	796.5	628.75	901.215	-9.035	-3.04168			40	918.08	758.33	1101.83	764.08	795.75	733	869.33	1009.25	1109.92	852.798	41.718	6.20757			40	787.83	960.08	1753.92
	41	917.17	964.5	990.5	1031.42	928.42	1023.67	773.92	856.25	924.08	847.75	883.58	856.25	866.17	754	894.92	901	709.25	891.17	1069.92	1060.33	913	1093.42	772.58	627.25	897.938	-12.3117	-4.14478			41	890.42	751	1113.42	765.5	808.08	727.75	879.08	992	1112	858.766	47.686	7.0956			41	815.33	953.42	1752.67
	42	929.25	956.25	984.5	1040	922.17	1025.17	761.25	854.08	917.08	851.92	884.75	852	875.92	746.08	885.75	881.33	716.83	895.58	1079.5	1059.33	907.08	1156.5	784.25	617.33	899.329	-10.9208	-3.67655			42	879	876.58	1110	767.17	805.33	734.25	868.17	985.75	1113.92	856.984	45.904	6.83044			42	809.5	948.75	1757.08
	43	915	959	984.58	1031	920.67	1028.17	770.17	853.33	916.75	856.25	885	868	878.42	749.5	872.25	895.25	711.17	873.5	1098.83	1053.5	911.33	1164.58	794.58	619.5	900.43	-9.81958	-3.30581			43	872.17	762.67	1105.5	759.42	796.42	727.17	884.58	1003.58	1103.58	854.618	43.538	6.47839			43	794.58	939.25	1736.08
	44	954.17	956.83	986.67	1019.25	916.08	1031.58	766.17	844.08	918.33	846.25	891.5	864.67	882.25	749.17	887.67	888.08	717.25	975.25	1081.58	1045.83	901.5	1157.08	781.5	622.83	903.565	-6.68458	-2.2504			44	888.5	767.08	1096.08	755.08	807.17	725.5	894.83	1005.67	1117.67	855.732	44.652	6.64415			44	801.33	931.25	1725.83
	45	915.58	966.92	1001.58	1035.5	892.67	1009.42	767.67	837.75	933.5	843.5	890.83	868.67	885.83	749.42	888.92	899.08	707.17	977.08	1075.25	1052.33	906.5	1174.5	800.5	622.25	904.267	-5.9825	-2.01404			45	881.42	765.83	1091.42	759.58	802.17	723.83	860.58	999.25	1101.17	847.516	36.436	5.42162			45	801.92	928.5	1713.92
	46	931.17	959.58	988.17	1040.17	906.92	1022.58	754.92	831.25	926.67	840.75	892.58	864.75	866.83	755.58	881.33	877.25	701.5	941.58	1087.92	1058	909.08	1143.83	796	626.83	900.218	-10.0317	-3.37721			46	870.33	771.25	1102.75	765.5	831.08	717.33	966.42	990.33	1107.83	876.616	65.536	9.75166			46	793.17	948.33	1686.08
	47	927.75	954.5	1006.17	1054.17	914.33	1015	765.67	835.08	931.42	837.75	906.33	866.67	878.75	742.75	885.67	886.58	715.5	959.33	1078.5	1052.5	890.5	1156.17	788.25	614.42	902.657	-7.59333	-2.55633			47	873.25	772.25	1106	756.42	811.25	729.58	488.92	1006.25	1120.83	778.434	-32.646	-4.85767			47	823.5	899.5	1692.33
	48	939.25	958.92	973.08	1049.5	905.25	1001.58	756.08	886.5	922.42	844.58	914.58	868.25	879.5	756	888.92	884.25	700.5	868.5	1090.08	1046.58	916.83	1154.67	772.08	612.42	899.597	-10.6533	-3.5865			48	865.92	774.75	1069	760.75	822.42	732.17	476.75	1000	1117	772.218	-38.862	-5.78261			48	827	898.75	1694.08
	49	924.5	952.67	991.67	1056.08	883.58	1016.58	760.5	812.67	945.5	834.33	903.58	862	881.75	754.75	872.33	882.58	706.75	881.83	1078.75	1055.5	895.42	1148.58	787.33	619.08	896.18	-14.0704	-4.73688			49	870.5	773.92	1071.08	759.58	810.5	726.58	766.25	1004.5	1132.92	826.798	15.718	2.33881			49	809.58	904.33	1682.25
	50	939.33	949.08	988.42	1074.67	895.67	1002.92	755.58	831	940.67	846.5	888.08	871.25	867.08	762.92	887.5	874.17	721.42	864.42	1070.42	1046.67	899.75	1153.08	789.17	615.33	897.296	-12.9542	-4.36108			50	873.08	772.08	1070.33	764.5	798.25	730.33	805	1000.92	1126.25	833.682	22.602	3.36314			50	818.67	1000.92	1688.67
	51	945.75	959	1003.58	1100.25	883.5	994.17	757.33	818.83	944.25	836.83	894.25	876.08	859.33	748.67	871.25	885.83	707.67	876.92	1067.17	1048.42	895.83	1172	785.5	621.67	898.087	-12.1633	-4.09485			51	888.33	788.42	1059.67	769.33	814.58	723	804.08	974.83	1127.17	835.344	24.2643	3.61049			51	818.58	994.25	1702.83
	52	922.83	955.33	998.92	1089.33	893.25	1003.5	755.67	825.08	942.92	840.25	898.92	882.58	867.75	751.08	887.75	886.67	707.58	877.25	1075	1064	882.33	1154.42	785.92	631.08	899.142	-11.1079	-3.73954			52	881.5	790	1078.08	763	800.33	714.5	850.42	975.67	1128.25	839.69	28.61	4.25712			52	811.75	995.75	1683.33
	53	948.67	961.67	985.25	1108.83	893.25	1030.83	790.33	822	944.67	836.58	877.83	876.83	877.42	748.25	872.75	891.25	706.67	875.67	1092.08	1072.08	884.17	1156.5	780.42	629.33	902.639	-7.61125	-2.56237			53	866.08	785.33	1069.42	754.33	823.5	736.17	830.25	982.5	1131.92	837.869	26.7886	3.9861			53	808.83	992.25	1698.33
	54	946.58	966.25	976.17	1083.42	897.5	1026.08	791.5	829.92	727.25	832.17	894.08	879.75	880.42	751.92	878.67	875.17	703.83	885.17	1072.92	1056	879.58	1162.08	790	630.08	892.355	-17.8954	-6.02458			54	858.92	769.67	1074.83	758.75	797	730.67	818.75	986	1124.83	829.799	18.7186	2.78529			54	799.92	995.42	1652.83
	55	940.5	958.25	994.17	1087.08	881.33	1019.33	791.92	833.58	893.75	817	901	887.58	898.08	759.5	870.67	884.83	713.42	867.17	1088.17	1043.5	876.92	1151.25	778.17	638.5	898.986	-11.2638	-3.792			55	865.75	780.75	1079.58	763.58	788.08	736.92	809.75	987.08	1151.33	832.059	20.9786	3.12158			55	814.08	976.25	1660.67
	56	949.83	978.42	972.5	1105.5	889.08	1030.17	781.58	845.33	938.67	829.42	887	867.58	883.75	748.58	878.92	886.25	705.83	887.08	1095.92	1051	879.67	1146.67	775	643.75	902.396	-7.85417	-2.64414			56	852.75	774.17	1063.58	761.25	781.58	719.25	809.75	973.75	1126.17	823.19	12.11	1.80195			56	809.67	989.25	1681.17
	57	936.67	977.58	986.58	1104.5	895	1025.58	791.17	831	940.83	817.5	876.58	874.83	898.67	746.42	888.17	875.92	713.92	879.67	1081.92	1038.42	875	1130.25	777.17	631.92	899.803	-10.4471	-3.51706			57	850.42	776.58	1071.25	759.58	811.58	734.42	787.92	976.17	1142.83	827.393	16.3129	2.42733			57	801.5	992.25	1632
	58	939.5	978.92	980	1108.33	887.42	1026.67	795.67	834.92	910.5	821.33	874.67	874.67	878	752.33	879.83	879.5	702.67	873.67	1092.83	1047.67	878.67	1131.92	784.67	635.08	898.727	-11.5233	-3.87939			58	856.08	782	1064.08	753.42	782.33	713.58	800.17	983.92	1132.67	821.666	10.5857	1.57514			58	806.08	989.67	1637.5
	59	932.67	961.33	985.92	1098	888.33	1010.42	791.83	828.92	906.17	829.5	891.42	873.17	883.83	756.08	882.33	880.67	716.33	869.17	1097.75	1062.08	870.83	1121.17	790.83	641.08	898.743	-11.5071	-3.87392			59	853.17	793.83	1069.5	769.08	773.92	730.33	797	985.25	1139.42	826.69	15.61	2.32274			59	811.17	987.5	1614.5
	60	937.58	989.83	981.17	1101.67	888.42	1009.42	790.67	833.58	919.08	823	876.33	879.83	884.17	764.25	885.83	890.08	707.17	873	1098.58	1052.42	875.75	1138.17	730.33	631.33	898.403	-11.8475	-3.98852			60	847.5	788.75	1070.58	758.83	775.92	721.25	801.33	960.33	1131.67	823.451	12.3714	1.84085			60	819.25	989.08	1640.67
	61	948.75	963.17	974.5	1077	895.5	1016.08	787.75	827.08	937.33	821.25	874	872.08	884.75	759.92	885.42	887.17	695.83	873.75	1108.58	1053.33	854.17	1116.58	743.17	639.5	895.694	-14.5558	-4.90029			61	842.75	794.33	1088.92	758.75	783.67	723.75	800.08	973.83	1136.33	827.464	16.3843	2.43796			61	803.58	991.75	1608.42
	62	945.75	958.33	987.08	1090.33	900.25	1014.92	777.83	864.25	918.67	826.5	870.75	884.25	886.75	753.33	878.25	884.08	702.83	891.5	1110.42	1093.42	868.92	1133.92	740.83	638.42	900.899	-9.35083	-3.148			62	853.33	790.33	1103.75	756.08	770.42	722.17	800.58	970	1156.58	828.094	17.0143	2.5317			62	813.25	986	1605.33
	63	936.25	951.25	983.08	1084.25	899.33	992.5	786.83	859.33	937.25	820.83	875.08	883.5	883.75	772.42	890.42	877.83	723.58	861.42	1101.58	1105.17	856.25	1100.08	745.17	638.08	898.551	-11.6987	-3.93844			63	846.25	786.5	1097.67	757.83	784.42	720.5	788.17	985.83	1135.5	825.906	14.8257	2.20604			63	806.42	982.75	1600.58
	64	950.33	947.92	990.92	1106.42	891.67	1015.75	783	850.67	922.17	820.67	875.58	878.17	884.33	766.33	884.92	886.5	717.75	857.5	1099.08	1101.92	851.58	1115.58	743.17	635.33	899.053	-11.1975	-3.76969			64	841	786.92	1132.83	753.08	795.33	716.08	805.17	981.75	1145.67	832.916	21.8357	3.24912			64	797.67	966.75	1592.67
	65	941.75	942.67	962.42	1106.33	889.33	996.42	769.42	850.75	931.75	829.42	872.33	882	889.75	760.67	880.42	874.67	721.08	862.42	1112.67	1109.33	835.17	1148.25	741.83	630.75	897.567	-12.6833	-4.26991			65	860.25	796.92	1097.83	751.5	792.08	722.42	786.92	974.83	1150.08	881.426	70.3456	10.4673			65	793.08	968.25	1598.17
	66	952.08	941.83	974.83	1107.5	893.83	1023	786.58	854.08	937.42	819.58	871.5	885.5	879.75	756.42	876.83	874.92	720.25	863.25	1119.25	1091.92	841.75	1108.17	735.08	626.33	897.569	-12.6812	-4.26921			66	859.67	807	1112.92	765.58	778.08	718.42	794.33	977.17	1164.75	886.436	75.3556	11.2128			66	790.92	987.75	1592.33
	67	944.83	943.75	961.75	1122.58	881	1005.08	778.08	852.92	938.58	811.17	858.5	894.75	890.42	759.08	886.17	881.58	718.25	867.42	1121.17	1108.33	855.25	1102.83	748.08	642.5	898.92	-11.3304	-3.81444			67	848.75	804.5	1106.25	755.58	798.08	719.25	795.25	971	1173.17	885.759	74.6789	11.1121			67	809.83	971.25	1584.92
	68	943.5	954	979.25	1131.92	891.75	995.25	783.33	849.58	910.42	825.83	862.67	883.25	880.17	758.17	876.17	888.25	717.42	857.25	1117.08	1103.75	830.33	1108.17	741.67	633.25	896.768	-13.4821	-4.53881			68	850.08	790.83	1095.83	766.42	796.92	727.33	813.08	983.92	1176.17	888.953	77.8733	11.5874			68	795.42	971.75	1591.42
	69	959.42	956.75	960.58	1144.33	885.75	992.58	771.08	835.5	907.58	817.67	862.08	883.75	890.75	769.75	892.25	872.58	733.08	860.83	1123.92	1124.08	847.33	1097.25	744.5	631.33	898.53	-11.72	-3.9456			69	850.58	797.25	1093.25	751.67	801.17	712.08	788.58	990	1180.25	884.981	73.9011	10.9964			69	792.75	971.58	1605.83
	70	952.58	944.83	964.67	1122.75	909.33	987.92	793.17	846.17	925.58	844.83	851.58	881.92	883.08	771.75	885.92	886.83	719.92	852.92	1065.17	1116.75	831.5	1122.33	731.08	636.17	897.031	-13.2188	-4.45016			70	849	791	1121.5	747.58	802.33	711.25	802.08	985.17	1186.75	888.518	77.4378	11.5226			70	792.25	979.67	1590.5
	71	952.83	958.33	985.08	1155.75	907.58	996.33	783.25	845.33	908.5	834.25	857.5	881.83	873.08	761	882	879.5	719.42	877.08	1135.42	1101.42	832.92	1129.83	750.25	634.75	901.801	-8.44875	-2.84431			71	851	801.08	1104	752.33	820.5	726.75	787.83	989.92	1178.92	890.259	79.1789	11.7817			71	797.17	972.17	1602.75
	72	952.25	948	973.33	1125.5	902.58	994.83	782.42	854.25	900.67	834.25	863	877.67	880.25	758.17	876	883.75	712.92	870.33	1150.67	1091.75	825.42	1127.5	744.67	636.25	898.601	-11.6488	-3.92161			72	832.42	792	1103.67	738.75	839.58	721.42	791.5	984.67	1193.42	888.603	77.5233	11.5354			72	791.67	962.17	1573.17
	73	942.67	952.67	970.42	1160.67	906.17	993.67	784.75	840.17	902.08	840	854	881.42	887.17	764.33	889.33	871.92	705.83	868.67	1112.58	1116.83	829.92	1105.5	742.83	633.83	898.226	-12.0237	-4.04786			73	846.17	800.33	1103	746.83	825.25	727.58	801.67	992.67	1176	891.056	79.9756	11.9002			73	790	968.25	1602.92
	74	965.42	955.33	954.08	1153.67	922	980.83	779.17	839	901.75	850.17	856.08	879.42	888.58	757.25	872.75	880.58	709.17	937.08	1126.58	1114.17	820.58	1115.08	743.67	636.67	901.628	-8.62167	-2.90253			74	858.33	811.33	1111.42	747.33	831.5	721	800.08	994.58	1193.25	896.536	85.4556	12.7157			74	776.42	972.42	1603.33
	75	958.5	970	954.5	1163.33	909.33	979.5	781.67	836.42	910	837.25	848.83	884.5	888.75	760.83	876.67	878.58	716.33	878.25	1128.67	1089.17	845.92	1124.33	740.67	620.33	899.264	-10.9862	-3.69858			75	851.5	810.67	1120.92	740.17	844.75	714.58	795.83	996.25	1218.42	899.232	88.1522	13.1169			75	781.5	976.67	1581.67
	76	952.42	966.5	968.83	1159.75	920.83	995.08	769.5	838.83	906.25	845.42	849.25	861.83	896.67	765.17	888.5	876.75	706.5	888.5	1136.5	1104.33	810.75	1128.42	743.58	624.5	900.194	-10.0558	-3.38535			76	859.33	813.5	1098.25	738.58	847	733.92	807.17	998.42	1204	900.019	88.9389	13.234			76	788.58	973.17	1581.17
	77	938.75	974.17	972.42	1185.83	913.58	982.5	778.08	838	900.17	833	854.08	896.42	902.08	770.5	874.83	870.42	711.92	890.67	1137.33	1076.25	825.25	1124.83	744.92	629	901.042	-9.20833	-3.10003			77	844.17	817.33	1112.17	727.83	783.92	728.25	817.75	984.08	1210.5	891.778	80.6978	12.0077			77	784.67	970.33	1571.25
	78	964.42	955.08	959.75	1357.58	926.67	972.67	781.25	836.92	910.5	835.58	852	886.33	886.83	769.67	877.83	870.25	697.67	894.58	1138	1097.33	824.33	1101.67	743.33	637.5	907.406	-2.84417	-0.957503			78	849.08	796.17	1106.75	732.83	791.17	715.33	809.75	999.83	1204.33	889.471	78.3911	11.6645			78	786.75	974.33	1568.75
	79	979.08	967.33	950.58	1181.17	933.67	968.25	766.5	833.17	889.83	844.25	851.92	880.58	882.67	771.25	886.5	874.92	704.08	890.92	1151.33	1105.08	810.25	1112.58	745.75	634.17	900.66	-9.59042	-3.22866			79	844.58	804	1105.92	733.33	790	733.5	808.42	996.42	1214.92	892.343	81.2633	12.0919			79	800.08	972.17	1597.58
	80	963.33	951.75	954.92	1160.17	928.42	955.92	780.42	836.58	898.58	842.83	842.58	887.08	900.33	776.08	892.42	876.5	693.75	893.83	1155	1104.58	814.17	1113.75	747.58	617.17	899.489	-10.7608	-3.62269			80	855.33	797.08	1103	736.5	812.75	727.58	819.17	996.5	1221.83	896.638	85.5578	12.7309			80	790	952.58	1598.42
	81	973.08	966.58	952.67	1191.83	929.83	974.33	766.67	826.67	1069.92	844.17	848.42	864.92	888.67	795.75	895.67	851.58	696.67	884.83	1156.75	1124.83	819.17	1111	735.92	612.67	907.608	-2.64167	-0.88933			81	841.42	805.42	1105.25	733.5	812.75	741.17	824.25	999.33	1217.33	897.824	86.7444	12.9074			81	782.92	975.58	1579.58
	82	964.08	966.75	939.58	1163.67	936.33	967.5	767.92	819.33	914.25	844.75	846.42	882.67	887.33	812.75	884.42	875	694.67	894.5	1150.33	1108.67	813.83	1130.75	749.67	605.5	900.861	-9.38875	-3.16077			82	856.5	809.75	1122.67	727.33	803.75	727.83	812.42	1012.42	1219.83	899.167	88.0867	13.1072			82	772.08	970.42	1576
	83	964.5	947.83	955.58	1183.58	934.33	972.33	775.58	837	902.58	837.75	846.75	884.33	888.58	809.42	885.92	875.5	690.17	903.17	1152.25	1125.75	801.83	1112.25	738.75	607.33	901.378	-8.8725	-2.98697			83	858.58	822.67	1128	740.67	801.92	745.42	830.25	1009.5	1213.75	905.64	94.56	14.0704			83	767.25	970.83	1578.75
	84	966	964.42	954.42	1179.75	928.75	964.58	762.42	842.08	918.17	837.33	852.92	867.58	905.58	814.08	882.75	879.33	684.5	895.67	1135.83	1125.58	813.42	1128.58	749.5	605.58	902.451	-7.79917	-2.62563			84	844.42	809.5	1116.42	738.67	790.25	723.25	826.67	999.75	1224.25	897.02	85.94	12.7877			84	767.75	920.67	1573.17
	85	968.67	964.92	947.67	1192.92	926.75	970.67	772.83	800.92	912.5	828.67	847	893	885.67	795.42	901.08	875.33	698.83	894.33	1146.83	1136	798.58	1132.92	742.58	617.58	902.153	-8.09708	-2.72592			85	846	809.17	1124.83	738.75	808.42	738	841.5	1004.5	1208.25	902.158	91.0778	13.5522			85	767.42	926.25	1560.5
	86	965.08	962.42	952.08	1180.17	930.25	960.67	780.08	792.75	911.83	830.75	840.75	884.58	897.58	811.75	902.33	864.58	685	900.33	1144.17	1129.92	794.08	1124.08	753.42	621.08	900.822	-9.42792	-3.17396			86	864.33	812.75	1105.92	755.92	803.67	761.42	840.42	1018.17	1235	910.844	99.7644	14.8448			86	795.92	937	1576.92
	87	956.08	974.42	961.33	1186.08	938.25	956.08	772.5	800.33	903.08	823.08	862.92	877.92	887.17	815.25	892.75	869.58	674.83	903.58	1151.58	1123.5	793.75	1135.67	744.33	621.67	901.072	-9.17792	-3.08979			87	856	822.92	1094.25	733.83	802.83	748.58	843.5	1016	1243.42	906.814	95.7344	14.2451			87	796.67	929.17	1576.08
	88	958.42	949.08	975.5	1166	930.08	957	779.08	807.75	915.33	839.33	854.67	871.83	892.25	811	915.33	867.92	686.75	904.67	1219.25	1138.33	803.75	1151.83	749.92	636.5	907.565	-2.68458	-0.903778			88	857.08	819	1085.67	723.5	802.17	762.17	832.17	872.96	1218.83	885.95	74.87	11.1405			88	788.5	935.92	1560.58
	89	974.42	966.92	956	1197.08	943.42	961.92	777.58	794.25	911.42	836.25	857.42	883	887.75	822.58	911.08	865.25	674	901.75	1218.17	1113.42	792.08	1141	753.33	622.75	906.785	-3.465	-1.16651			89	857.58	808.5	1088.5	721.17	789.58	759	841.92	890.88	1219.58	886.301	75.2211	11.1928			89	780.33	939	1571.58
	90	975.08	973	974.17	1175.33	945.42	997.17	768.42	792.92	894.75	835	857.25	876.67	886.08	828.42	908.08	860.17	677.58	904.5	1209	1118.25	777.17	1140.5	740.92	631.08	906.122	-4.12792	-1.38968			90	875.67	819.58	1089.33	717.33	778.25	760.83	829.08	900.54	1225	888.401	77.3211	11.5053			90	786.83	939.17	1601.67
	91	963.25	949.75	977.08	1176.92	933.67	992.42	772.75	782.42	918.58	851.17	861.33	871.17	870.17	818.17	924.75	888.58	681.58	917.58	1204.25	1130.17	783.17	1128.5	755.67	626.5	907.483	-2.76667	-0.931412			91	841.58	810	1116.08	718.08	796.58	773.75	845.25	898.79	1222.83	891.438	80.3578	11.9571			91	802.58	942.58	1620.92
	92	972.83	958.83	989.25	1198.17	941.67	996.17	775.83	795	909.08	847	853.58	887	875.08	814.42	914.5	870.92	685	902.5	1207.92	1147.25	781.33	1149.58	747.42	625.42	910.24	-0.0104167	-0.00350682			92	861.67	820.08	1102.5	739.17	784.58	769.17	861.17	898.17	1202.83	893.26	82.18	12.2283			92	777.5	936.75	1631.92
	93	973.17	981.83	967.83	1194.92	946.83	999.25	767.25	798.25	913.17	838.33	852.08	878.58	877.75	828.17	922.58	875.67	683.17	909.67	1192.42	1154.92	772.42	1134.83	757.83	639.33	910.844	0.59375	0.199889			93	852	824.83	1119.42	721.58	787.33	761.92	858.83	930.38	1177.92	892.69	81.61	12.1434			93	768.33	936.42	1592.5
	94	966.25	970.33	974.33	1169.5	943.08	1003.42	772.25	794.92	901.17	824.67	852.58	875.5	881.75	831.92	920.58	870.67	684.25	909.67	1240.67	1135.5	785.67	1127.42	763.33	620.92	909.181	-1.06875	-0.3598			94	841.83	817.58	1108.08	727	791.5	764.08	848.75	938.25	1208.08	893.906	82.8256	12.3243			94	767.5	936.17	1603.58
	95	950	966.75	977.83	1170.67	941.33	992.08	773.83	794.33	914.75	851.5	855.25	878.58	871.25	828	930.67	873.17	676.33	921.17	1244.83	1143	779.58	1123.5	760.33	617	909.822	-0.427917	-0.14406			95	847.17	814.17	1112.67	725.92	783.92	786.58	859.5	892.42	1194.25	890.733	79.6533	11.8523			95	779.17	940.08	1597.42
	96	960	984	974.67	1190.5	957	998.33	775.83	790.83	906.92	853	849.5	881.67	877.5	829.17	937	879.58	695.75	922.58	1126.33	1148.08	773.17	1129	755.42	618.33	908.923	-1.32667	-0.446629			96	935.25	821.08	1132.67	726.92	783.58	782.58	851	885.25	1206.92	902.806	91.7256	13.6486			96	760.25	946.5	1576.25
	97	964.25	971.17	976.17	1176.92	948.17	1000.5	771.83	792.67	905.42	858.83	852.08	876.42	884.42	819.08	939.17	876.17	696.75	919.83	1116.5	1150	774.75	1113.67	755.83	620	906.692	-3.55833	-1.19793			97	981	813.83	1117	717.08	794.08	781.25	863	891.13	1205.08	907.05	95.97	14.2802			97	763.5	920.92	1597.08
	98	965.33	980.42	973.17	1199.42	953.5	989.42	776.33	790.08	909.92	831.5	862.67	866.75	877.58	808.42	930.33	865.25	693.83	922.67	1108	1170.58	771.42	1116.25	749.42	623.42	905.653	-4.59667	-1.54749			98	1021.67	822.42	1132.92	727	765.58	768.25	861.83	905.79	1205.58	912.338	101.258	15.067			98	761.83	923.5	1583.58
	99	959.33	970.17	968.5	1176.67	932.17	990.67	774.17	799.17	894.17	843.08	848.58	888.5	874.5	818.25	937.42	874.33	695.58	924.92	1095.75	1174.08	771.58	1127.17	749.42	634.5	905.112	-5.13833	-1.72985			99	1002.83	820.25	1126.25	723.33	775.75	788	904	890.5	1220.83	916.86	105.78	15.7399			99	756.58	930.67	1586.33
	100	959	968	974.5	1159.17	941.67	976.75	777	798.5	923	847.42	856.17	887	868	830.17	936.75	867	703.33	925.67	1110.42	1160.58	760.75	1127.33	748.92	632.5	905.817	-4.43333	-1.4925			100	944.58	813.08	1127.17	713.33	771	777.17	855.33	913.21	1226.92	904.643	93.5633	13.9221			100	763.58	919.42	1577.42
	101	963.5	981.83	969.75	1146.17	941.08	983.08	759.92	778.83	918.5	833.33	845.17	893.67	856.17	825.58	935.33	870.42	699.42	931.33	1103.5	1184	764.75	1113.08	749.58	630.75	903.281	-6.96917	-2.3462			101	922.33	812	1128.25	713.17	770.83	788.08	858.33	930.67	1220.42	904.898	93.8178	13.9599			101	750.92	940.67	1582
	102	959.08	979.42	959.08	1159.92	935.83	975.67	784.42	806.83	919.75	837.83	850.75	897.75	866.75	827.67	937.5	873.25	700.42	930	1110.92	1211.92	758.08	1106.25	768.58	649.08	908.615	-1.63542	-0.550571			102	551.83	799.08	1131.92	717.67	883.75	781.67	853.08	897.83	1236.08	872.546	61.4656	9.14598			102	759.83	919.25	1539.92
	103	967.75	976.5	962.33	1153.92	951	979.17	783	799	907.92	851.75	858.33	900.42	867.75	820.08	953.08	887.83	714	947	1109.83	1207.83	752.83	1118.58	794.42	634.67	912.458	2.20792	0.743306			103	500	811.33	1124.83	718.17	763	780.08	863.92	910.88	1237.33	856.616	45.5356	6.77562			103	771.08	935.42	1530.75
	104	971.42	990.25	963.33	1159.75	940.25	976	780.92	797.33	905.83	850.42	831	874.83	859.25	836.25	954.33	861.25	706.25	922.83	1089	1213.17	761.58	1116.83	767.17	629.75	906.625	-3.62542	-1.22051			104	904.92	805.42	1151.33	746.75	820.25	785.42	863	907.71	1226.42	912.358	101.278	15.07			104	768.33	929.92	1534.67
	105	966.92	994.83	973.75	1150.83	942.42	978.33	781	792.42	917.25	842.83	839.08	897.92	867.83	819.92	946.25	867.5	706.75	925.67	1088.25	1207.25	763.42	1131.83	763	635.92	908.382	-1.86792	-0.628843			105	901.92	808.75	1126.17	720.92	811.5	776.25	865.83	935.67	1235.92	909.214	98.1344	14.6023			105	758.08	940.67	1549.17
	106	955.92	985.17	959	1157.75	936.75	977	785.25	789.92	911.75	852	850.25	894.67	870	821	945.25	881.33	714.75	935.92	1104.75	1214.17	761.42	1108.58	746.5	640.08	908.299	-1.95083	-0.656758			106	959.17	812.08	1142.83	727.17	823.92	783.92	864.92	937.33	1243.58	921.658	110.578	16.4538			106	762	932.25	1539.67
	107	970.42	945.92	968.08	1141.25	927.33	971.33	787.17	793.5	926.92	843.08	846.42	894.92	860.33	823.92	953.42	875.17	712.5	940.33	1107	1236.92	754.58	1117.25	766.42	645.75	908.747	-1.50292	-0.505964			107	938.33	799.42	1132.67	726.75	822	785.58	867.67	947.58	1239.83	917.759	106.679	15.8737			107	759.42	950.75	1523.17
	108	953.17	945.5	966.75	1152.58	932.17	961.83	780.17	807.83	905.92	853.83	844.25	894.42	863.83	818.67	962.42	870.33	708.67	930.83	1102.42	1250.08	746.75	1111.42	774.08	651.83	907.906	-2.34375	-0.789035			108	923.92	793.08	1139.42	714.92	821.33	780	876	958.29	1228.67	915.07	103.99	15.4736			108	759.58	948.5	1526.83
	109	958.83	958.42	977.5	1145.17	928.33	961.83	772.42	801.42	910.58	868	846.17	886.67	874.83	820	975	862.58	713.42	935.42	1107.25	1237.08	748.33	1120.83	766.25	644.33	909.194	-1.05583	-0.355452			109	941.67	812.33	1131.67	720.33	818.33	784.83	869.67	960.75	1243.17	920.306	109.226	16.2526			109	758	920.25	1542.17
	110	949.58	951.67	968.92	1154.33	931.83	969.08	774.67	784.33	919.08	853.67	844.17	901.75	858.42	839.75	971.67	868.5	713.17	928	1113.83	1266.42	759.92	1102.33	762	656.92	910.167	-0.0829167	-0.0279143			110	950.58	801.83	1136.33	732.25	812.5	786.33	1012.08	898	1248.08	930.887	119.807	17.827			110	770.67	940.92	1528.75
	111	956.92	946	978	1160.92	926.58	1057.42	764.92	795.5	913	863.33	852.17	889.92	864.67	831.92	980.08	868.75	703.58	929	1105.83	1262.25	757.75	1101.33	773.08	639.83	913.448	3.19792	1.07659			111	953.75	808.83	1156.58	730.67	811.5	788.67	875.83	897.42	1219	915.806	104.726	15.583			111	750.5	945.42	1506
	112	970.42	960.5	967.42	1161.58	933.58	1037	767	805.5	915.17	842.83	843	905.58	845.83	807.5	971.17	876.67	699.92	933.25	1124.75	1248.25	752.17	1097.75	778.92	648.67	912.268	2.01792	0.679342			112	946.33	805.17	1135.5	713.25	812.25	789.33	897.33	900.46	1247.75	916.374	105.294	15.6677			112	764.67	933	1520.75
	113	964.75	983.58	982.92	1164.25	926.83	1051.83	766	788.42	930.42	856.58	832.92	897	849.83	824.92	971.25	861.17	696.42	931	1105.92	1267.17	745.08	1100.17	766.75	647.17	913.015	2.76458	0.930711			113	937.83	794.08	1145.67	721.92	811.75	789	889.17	897.92	1250.58	915.324	104.244	15.5114			113	755.33	932.42	1508.08
	114	962.5	946.5	964	1159.42	940.75	1025.25	753.92	812.17	923.17	850.92	842.92	894.5	848.08	819	974.17	875.25	696.67	926.17	1122.83	1272.42	738.83	1070.58	773.08	669.83	910.955	0.705417	0.237482			114	942.83	807.58	1150.08	729.58	809.25	788.75	897.25	895.75	1252.33	919.267	108.187	16.098			114	750.5	941.5	1488.83
	115	960.75	972.5	985.33	1159	921.67	1038	773.67	787.83	923.67	857	847.17	891.75	849.92	833.42	973.17	865.75	692.75	933.17	1107.08	1284.25	743.75	1088.67	777.75	641.75	912.907	2.65708	0.89452			115	938.5	803.75	1164.75	715.83	811.17	795.83	894.75	902.46	1265.83	921.43	110.35	16.4199			115	764	930.42	1485.25
	116	978.67	953.75	974.17	1168.25	922.92	1029.25	774.92	798.5	923.25	850.58	850.58	889.17	844.08	837.83	972	864.08	699.17	942.92	1121.33	1285.33	747.25	1071.08	782.83	646.33	913.677	3.42667	1.1536			116	934.25	799.17	1173.17	716.75	822.42	796.58	903.08	903.54	1245.17	921.57	110.49	16.4407			116	759.5	946.75	1498.58
	117	956.17	965.17	980.92	1148.33	921.67	1034.25	761.67	795.5	931.17	849.08	840.42	897.5	837.92	831.92	977.42	854.58	706.25	935.33	1102.83	1299.42	744.5	1114	762.83	655.08	912.664	2.41375	0.812601			117	929	805.17	1176.17	728.92	806.33	786.67	889.67	897.83	1265.42	920.576	109.496	16.2928			117	772.25	957.08	1485.17
	118	976.5	978.42	970.75	1161.5	933.42	1037.92	763.58	796	928.42	860.83	837.42	895.67	859.83	811.92	981.83	1005.08	692.25	930.17	1112.42	1295.17	738	1103.08	745.17	652.08	919.476	9.22625	3.10606			118	934.83	804.33	1180.25	716.42	812.83	799.75	895.17	895.08	1269.5	923.129	112.049	16.6727			118	754.08	954.25	1481.58
	119	975.08	973.42	984.33	1147.67	935.08	1029.5	765.67	793.42	920.5	838.42	833.33	883.08	857.67	837.17	999.08	859.67	692.33	903.33	1113.08	1314.58	744.75	1101	754.42	645.58	912.59	2.34	0.787773			119	930.42	817.5	1186.75	722.08	802.17	808.58	896.17	901.25	1262.25	925.241	114.161	16.987			119	765.42	966.17	1493.5
	120	976.25	972.75	963.67	1169.33	917.67	1027.42	758.42	792.83	926.58	830.5	826.17	882	857.17	821.75	974	861.5	687.67	921.42	1120.25	1285.92	736.67	1096.75	740.17	656.67	908.48	-1.76958	-0.595739			120	938.17	822.25	1178.92	721.25	817.5	794.92	901.25	901.96	1250.08	925.144	114.064	16.9726			120	757.25	954.25	1474.75
	121	986.67	972.83	976.17	1147.58	938.75	1015.67	764.83	784	918.08	827.08	838.75	882.08	840.25	829.17	992.42	869.92	692.17	912	1116.92	1292.42	736.17	1102.75	754.92	638.17	909.574	-0.67625	-0.227663			121	947.83	808.42	1193.42	723.08	812.83	809.33	885.75	903.58	1251.33	926.174	115.094	17.1259			121	753	957.92	1481.92
	122	982.42	977.83	979.58	1161.58	912.08	1025.08	765.25	785.33	928.08	816.92	837.75	878.25	840.58	833.17	989.75	862.33	725.33	944.83	1117.25	1289.42	743.5	1091.08	770.67	645.25	912.638	2.38792	0.803904			122	926.58	818	1176	722.33	804.58	818	892.58	910.79	1250.25	924.346	113.266	16.8537			122	752.08	961.67	1475.83
	123	989.83	971.42	990.58	1137	918.67	1017.42	756.75	787.75	921.33	821	834.92	895.92	841.25	841.33	984.67	856.5	724.92	933.42	1113.75	1294.58	730.5	1092.33	756	656.33	911.174	0.92375	0.310985			123	939.75	813.75	1193.25	723.58	808.58	818.92	901.17	903.92	1252.17	928.343	117.263	17.4486			123	748.67	945.5	1453.17
	124	983.67	976.92	981.17	1168.17	923.67	1021.25	763.92	799.58	929.33	808.42	834.75	875.33	851.58	834.5	988.67	857.33	733.5	931.75	1122.5	1275.33	739	1070.58	762.33	640.83	911.42	1.17	0.393886			124	938.08	828.17	1218.42	721.92	807.08	829.08	910.33	896.38	1251	933.384	122.304	18.1987			124	758.58	958.17	1468.58
	125	989.58	987.25	990.08	1146.33	918.92	1020.42	760.67	794.67	921.33	819	844.17	869.67	852.25	819.92	1001.08	863.33	722.42	942.42	1133.42	1293.5	742	1088.75	751.83	638	912.959	2.70875	0.911914			125	931.58	830.25	1204	716.25	813.08	826.17	901.83	892.33	1264.75	931.138	120.058	17.8644			125	755.92	958.5	1461.33
	126	989.17	990.08	981.08	1156	909.33	1009.42	766.92	792.17	910.83	819.67	815.83	874.42	842.67	829.5	982.75	871.58	724.42	925.08	1116.17	1310.25	735.42	1079.83	770.75	655.08	910.767	0.5175	0.174219			126	939.17	823.08	1210.5	719.92	797.67	830.5	915.92	887.92	1250.17	930.539	119.459	17.7753			126	749.33	948.33	1465.67
	127	982.83	1000.25	979.83	1099.83	898.67	1624.75	755.33	792.42	919.67	826.17	851.75	878.33	864.08	823.92	989.67	863.08	733.67	929.42	1119.08	1307.92	737.33	1075.08	770.58	650.42	936.42	26.17	8.81026			127	921	839.17	1204.33	717.33	810.08	834.92	918.83	885.79	1272	933.717	122.637	18.2481			127	751.83	956.33	1466.67
	128	992.58	991.67	985.67	1138.58	911.33	1020.08	770.25	792.42	921.5	809.5	847.92	875.5	842.83	824.58	997.5	858.75	728.83	924.42	1111.08	1314.33	745.17	1075.67	779.5	658.25	913.246	2.99625	1.0087			128	919.5	842.17	1214.92	735.75	801.83	819.83	922.33	880.46	1263.17	933.329	122.249	18.1904			128	772	960.92	1455.25
	129	984.83	1009.17	985.08	1093.75	903.67	1010.67	751.5	782.5	923.42	805	842.92	874.58	847.67	821.5	1009.25	865.17	733.92	1329.17	1125.92	1301.17	733.08	1082.08	770.67	651.25	926.581	16.3308	5.49786			129	938	837.67	1221.83	730.08	797.92	834.75	928.58	880.71	1257	936.282	125.202	18.6299			129	750.5	946	1459.83
	130	993.5	1012.08	992.08	1130.42	910.58	1013.83	757.08	780	920.25	810.83	839.08	864.58	861	828.83	1003	880.08	729.58	929.25	1132.42	1330.67	728.58	1071.92	764.75	655.17	914.148	3.89833	1.31239			130	926.17	849.67	1217.33	730.83	809.67	830.33	930.08	876.29	1259.92	936.699	125.619	18.6919			130	758.08	953.17	1452
	131	1003.75	1012.58	974.25	1091.58	900.17	989.83	765	796.75	927	816	830.58	870.58	841.08	820.17	993.17	861.75	723.33	932.83	1120.75	1306.58	762.42	1060.67	762.42	653	909.01	-1.24	-0.417452			131	924.17	850	1219.83	722.92	795.25	823.75	924.25	878.21	1248.42	931.867	120.787	17.9729			131	744.33	944.67	1434.08
	132	986.5	1018.25	965.25	1128.42	903.67	992.08	764.17	799.83	925	798.08	830	868.25	854.33	822.42	1011.92	852.42	718.83	930.67	1127.67	1299.25	737.17	1062	777.33	661	909.771	-0.47875	-0.161174			132	919.08	854.17	1213.75	723.83	795.75	832.25	938.5	876.13	1248.17	933.514	122.434	18.2181			132	747	950.92	1438.58
	133	979.5	1033.58	971.75	1085.83	903.83	987.75	758	796.08	931.75	810.92	837.75	846	860.75	812.83	1015.42	852	731.08	926.17	1118.5	1307.25	733.25	1069.42	775.67	645.33	907.934	-2.31625	-0.779777			133	923.83	839.42	1224.25	728.5	803.75	836.08	926.67	882.46	1258.42	935.931	124.851	18.5777			133	752.17	939.67	1432
	134	999.75	1019	988.33	1139.25	907.5	984.92	758.5	797.5	930.58	817.58	830.25	848.5	861.58	808.5	1006.5	875.08	729.67	928	1120.08	1287.92	730.42	1060.58	762.58	666.25	910.784	0.534167	0.17983			134	926.75	857.92	1208.25	739.92	799.25	832.17	943	881.96	1246.08	937.256	126.176	18.7747			134	748.58	944.92	1421.17
	135	996.58	1028.25	985.25	1086.33	903.92	978.75	750.67	793.5	941.17	817.58	835.25	842.33	858.5	812.83	1019.58	861.67	761.92	917.17	1108.58	1312.5	731.92	1055	759.25	660.33	909.118	-1.13208	-0.381122			135	930.25	848.17	1235	738.5	791.17	825.58	946.33	879.17	1249.08	938.139	127.059	18.9062			135	856.42	934.33	1431.33
	136	1004.5	992.33	987.58	1130.5	903.92	975.42	750.42	796.58	934.75	802.67	840.67	848.42	862.58	825.83	1019.83	861.75	743.67	932.83	1114.92	1324.5	735.08	1059	775.08	660.17	911.792	1.54167	0.51901			136	924.08	856.08	1243.42	730.67	793.33	842.83	954.83	875.21	1258.25	942.078	130.998	19.4923			136	742.42	930.5	1423.67
	137	997.25	1013.17	981.92	1087.83	901.33	1058.67	747.5	794.42	928.17	804.75	837.17	838.33	878.33	811.58	1025.92	868.83	719.92	912.75	1117.58	1302.58	724.67	1061.33	769.67	656.08	909.99	-0.260417	-0.0876706			137	923.25	865	1218.83	728.58	799.83	835.42	961.58	878.67	1268.25	942.157	131.077	19.504			137	745.92	924.92	1405.92
	138	991.75	1002.75	988.83	1115.83	901.08	1039.17	750.83	797.5	928.5	803.92	819.83	833.08	882.5	817.08	1017.83	858.25	731	918.5	1108.75	1299.25	732.33	1056.25	781.92	664.17	910.037	-0.2125	-0.0715392			138	907.25	860.75	1182.42	719.67	808	846.5	966.42	887.13	1264.83	938.108	127.028	18.9015			138	784.92	930.83	1407.75
	139	1002	998.42	975.67	1105.33	896.58	1031	757.58	785	958.75	808.17	805.42	824.42	885.25	813.17	1027.42	871.5	736.75	908.83	1100.75	1313.58	731.25	1058.92	773.83	650.58	909.174	-1.07625	-0.362325			139	925.5	866.25	1191	733.67	791.33	832.75	976.58	886.75	1261.5	940.592	129.512	19.2712			139	729.58	927.5	1407.17
	140	993	1009.33	999.83	1129.75	908.08	1010.17	755.92	787	952.92	809.67	814.83	824.42	893.92	816.08	1012.83	862.42	738.83	915.75	1107.33	1306.67	738.08	1046.83	782	652.5	911.173	0.923333	0.310845			140	920.5	881.42	1203.58	730	803.67	832.75	962.58	873.25	1261.08	940.981	129.901	19.3291			140	734.83	922.75	1427.33
	141	996.58	1007.17	996.17	1112.25	895.92	1032.33	753.17	788.17	964.5	803.83	803.42	832.5	883.67	817.25	1013.25	871.17	733.75	927	1120.42	1309.25	747.92	1060.75	761.75	671	912.633	2.38292	0.802221			141	929.17	867.67	1212.33	732.42	803.42	837.67	956.83	878.96	1260.25	942.08	131	19.4926			141	739	919.08	1393.17
	142	994.67	1027.67	992.58	1131	905	1003.58	743.58	791.75	949.75	798.67	843.25	826.25	901.58	815.33	1026.25	860.25	740.25	928.75	1134.75	1304.33	724.25	1061.67	791.58	665.83	915.107	4.85708	1.63516			142	910.25	856.75	1204.33	744.17	797.33	853.17	970.42	880.92	1260.92	942.029	130.949	19.485			142	732.5	927.42	1399.08
	143	997.08	1022	1002	1091.33	897.92	1012.5	748.17	794.67	940.83	802.83	839.92	817.83	907	808.75	1026	850	735.5	909.25	1109.25	1294.33	741.08	1046.17	778.67	667.92	910.042	-0.208333	-0.0701365			143	904	861.42	1225.83	743	798.83	848	956.58	879.96	1253.5	941.236	130.156	19.3669			143	730.17	840.5	1407.75
	144	1016.08	1025.17	1000.92	1111.92	897.42	1003.33	743.08	797.83	942.33	802.83	832.25	812.33	914.42	806.17	1028.5	849.25	742.83	910.5	1115.92	1301.92	723.25	1063.25	773.83	669.33	911.861	1.61083	0.542295			144	917.17	893.08	1202.92	734.33	805.17	835.58	949.67	879	1265.58	942.5	131.42	19.5551			144	732.25	837.58	1392.58
	145	997.5	1022.25	1008.58	1086.92	908.5	1009	739.92	796.42	941.08	799.25	832.67	815.5	917.08	803.75	1028.25	860.67	746.08	911.25	1120.42	1292.58	732.42	1059.25	775.25	667	911.316	1.06625	0.358958			145	911.17	871.67	1222.42	739.25	781.92	841.5	961.17	873.17	1253.83	939.567	128.487	19.1186			145	737.08	858.17	1407
	146	1009.08	1041.42	1011.67	1097.5	894.58	1011.25	731.92	793.25	936.5	799.75	836.58	822.33	926.17	804.67	1036.33	848.75	739.42	928.5	1112.08	1300.42	737.08	1047.67	772.83	689.42	913.715	3.46542	1.16665			146	901.33	860.58	1242.83	734.58	789.83	865.83	938.08	870.29	1251.92	939.474	128.394	19.1049			146	736.33	857.08	1378.33
	147	1008.33	1027.25	992.83	1074.42	898.08	996.67	736.25	798.83	940.92	793.92	835.33	812.67	947.75	807.67	1019.92	848.25	733.42	934.17	1113.33	1331.17	736.33	1052.75	774.17	661.42	911.494	1.24375	0.418715			147	911.58	864.5	1210.42	736.42	788	835.58	952.17	887.21	1254.75	937.848	126.768	18.8628			147	733	847.67	1379.83
	148	991.67	1030.33	994.42	1110.17	890.25	1011.17	729.83	788.5	935.08	807.25	835.5	813.58	964.08	798.92	1030.5	843	736.17	917.92	1107.5	1333.75	741	1046.17	780	662.67	912.476	2.22625	0.749478			148	911	872.58	1190.58	742.58	779.42	852.5	951.92	877.13	1262.17	937.764	126.684	18.8504			148	728.25	849.83	1396.08
	149	986.67	1042.92	926.33	1058.08	898.75	1015.25	737.17	784.92	939.17	791.75	836.92	800.42	980.25	802.67	1025.5	823.92	747.92	924.33	1119.83	1332.33	729.58	1045.25	768.25	675.83	908.084	-2.16625	-0.729279			149	920.83	862.83	1191.83	747.5	768.5	840.67	952.25	871.25	1278.83	937.166	126.086	18.7613			149	743.83	853.42	1380.92
	150	976.25	1054.83	1030.42	1113.92	894.33	998.92	734.17	785.42	951.58	812.08	839	829.67	986.75	807.58	1033.58	841.25	749.75	915.75	1108.25	1329.25	731.58	1026.08	778.5	671.75	916.694	6.44417	2.16946			150	921.92	880.17	1200.67	738.25	770.67	866.5	954.67	878.25	1261.75	941.428	130.348	19.3955			150	914.75	847.5	1377.5
	151	977.25	1050.58	1023.75	1091.25	886.33	1008.83	731	781.42	927.08	800.08	841.58	841.92	1020.92	815.58	1034.58	838.67	754.08	912.92	1124.83	1344.25	734.67	1043.33	778.67	690.58	918.923	8.67292	2.91978			151	917.42	862.25	1191.92	745	779.25	854.58	941.42	877.04	1247.92	935.2	124.12	18.4689			151	721.75	843.83	1377.92
	152	986.25	1035.58	1038.25	1103.25	890.25	1002.42	728.25	790.33	935.17	807.42	835.17	832	1042.08	807.17	1035.75	830.08	746.17	921.33	1130.67	1323.75	721.67	1028.33	773.67	688.25	918.052	7.8025	2.62675			152	928.42	859.75	1204.75	741.08	767	836.67	943.75	876.42	1265.33	935.908	124.828	18.5742			152	732.17	841.67	1287.08
	153	965.25	1066.5	1014.58	1057.92	895.92	967.75	730.33	784.75	950.92	789.33	829.33	826.25	1075.17	802.75	996.92	833.5	750.67	926.33	1115.42	1343.58	735.42	1025.5	780.42	705.67	915.424	5.17417	1.74191			153	924.58	845.08	980.42	739.25	778.92	853.67	966.67	869.17	1258.33	912.899	101.819	15.1505			153	728.33	847.17	1274.83
	154	969.08	1057.17	1017.33	1102.67	867.17	959	721.08	788.83	945.08	806.67	838.75	839.08	1106.17	809.92	1006.83	851.17	742.17	919.75	1126.75	1342.92	722.25	1045.17	773.58	719.17	919.907	9.65667	3.25097			154	927.33	856.67	1260.08	734.67	786.5	858.92	945.58	884.08	1248.83	944.74	133.66	19.8884			154	734.33	842.25	1278.83
	155	980.67	1067.58	1022.33	1104.83	898.5	970.5	730.67	778.83	952.92	791.67	838.5	824.5	1135.83	809.42	1005.83	823.58	754.08	912.42	1122.5	1359.83	718.25	1038	776.92	750.83	923.708	13.4579	4.53067			155	920.08	868.67	1242.17	733.08	809.33	852.67	953.5	878.75	1250.58	945.426	134.346	19.9904			155	726.33	854.67	1368.33
	156	973.25	1055.33	1016.75	1101.83	886.42	957.83	715.33	778	949.33	800.67	837.08	821.42	1178.25	810.42	1018.83	839.5	767.92	913.67	1119	1377.75	729.83	1000.5	766.83	792	925.323	15.0725	5.07423			156	920.25	855.58	1248.17	744.5	784.67	856.08	950.58	877.08	1244.08	942.332	131.252	19.5301			156	721.83	840.67	1375.67
	157	960.17	1055.25	1025.42	1098.25	882.5	981.17	719.92	789.33	955.42	807.33	855.58	810.08	1221.42	803.83	1018.75	835.67	758	937.42	1120.33	1371.58	697.42	1004.25	786.17	820	929.802	19.5525	6.58245			157	931.42	859.83	1244.5	734.17	789.92	865.83	932.67	876.5	1281.33	946.241	135.161	20.1118			157	730.83	846.17	1359
	158	956.17	1048.67	1018.83	1100.67	887.75	978.75	732.17	776.08	954	803	847.08	819.17	1279.42	797.75	1032.83	834.08	743.42	935.75	1117.83	1368.17	737.75	1000.83	784	934.92	937.045	26.7954	9.02081			158	922.42	845.92	1248.25	739.17	784.67	847.92	943	877.67	1293.5	944.724	133.644	19.8861			158	723.42	846.17	1355.92
	159	961.5	1058.92	1009.75	1092.08	866.08	976.5	734	746.33	958.25	797.67	837.92	815.67	1332.42	800.17	1040.25	846.83	755.25	944.42	1238.25	1367.83	753.42	1003	796.58	1089.75	950.952	40.7017	13.7024			159	930	862	1251	716.42	783.42	863.75	943.92	875.17	1281.58	945.251	134.171	19.9645			159	724.25	847.92	1361.83
	160	968.67	1065.58	1033.5	1090.42	882.17	1013.33	727.67	784.92	945.42	805.42	839	811.58	1353.25	806.67	1030.08	833.42	758.5	941.5	1245.58	1369	748.83	1011.42	797.75	1154.17	959.077	48.8271	16.4379			160	931.08	868.5	1238.58	739.58	790.42	857	950.17	868.71	1261.42	945.051	133.971	19.9347			160	726.42	840.75	1351.58
	161	965.25	1055.92	1011.42	1086.67	888.67	1021.42	727	762.17	955.08	802.67	840.92	808.5	1446.42	805.92	1052.92	828.58	755.83	933.42	1180.92	1356.25	776.58	1004.17	795.42	1159.17	959.22	48.9704	16.4861			161	928.83	839.17	1256.67	735.33	788.08	861.5	931.08	877.21	1283.17	944.56	133.48	19.8616			161	720	833.92	1355
	162	972.83	1072.75	1022.92	1076	880.25	998.83	727.75	778.83	971.17	810.25	840.92	802.75	1489.42	789.33	1044.17	836.75	768.83	932.83	1172.92	1383.83	769.25	1018.42	815.83	1136.42	963.052	52.8021	17.7761			162	946.42	845.17	1244.58	723.33	789.92	853.08	948.17	869	1281.42	944.566	133.486	19.8624			162	723.5	844.75	1345.67
	163	945	1049.25	1017.33	1089.75	875.42	1013.08	726.83	778.17	959.08	820.67	827.33	812.33	1496.25	794.67	1030.83	830.33	752.08	957.17	1183.42	1367.33	764.42	1005	782	1139.58	959.055	48.805	16.4304			163	922.67	846.33	1262.75	730.58	802.58	864.5	948.17	868.92	1277.58	947.12	136.04	20.2425			163	743.83	825.92	1348.75
	164	871.83	1064.25	1017.08	1062	873	1012.08	725.42	777.92	958.17	821	835.5	809.17	1521.08	792.75	1056.75	824.17	746.08	925.25	1193.33	1380.92	765.75	1012.67	794.75	1139.42	957.514	47.2642	15.9117			164	942.08	859.92	1268.75	718.67	791.67	866.92	944.5	865	1274.08	947.954	136.874	20.3667			164	728.58	837.33	1339.67
	165	872.92	1058	1005.33	1057.67	863.25	1006.75	723.08	765	956.58	804.33	838.25	808.67	1554.42	799.17	1059.17	829	755	958.08	1201.58	1396.75	764.92	992	794.92	1117.42	957.594	47.3442	15.9387			165	928.25	861	1253	740	801.58	866.42	940	859.5	1278.58	947.592	136.512	20.3128			165	727	826.5	1331.33
	166	878.58	1065.25	1020.42	1048.92	864.83	1021.08	724.33	768.17	966	819.58	841.08	812.25	1554.67	797	1079.75	842	751.42	954.42	1211.17	1369	765.08	1005.08	798.17	1105.75	961	50.75	17.0852			166	959	849.17	1275.5	732.42	799.75	896.42	941.67	866.29	1265.17	953.932	142.852	21.2562			166	756.33	828.17	1329.42
	167	870.17	1072.67	1022.75	1053.58	867.42	1023.67	711.92	757.58	979.75	815.67	848.42	803.5	1584.25	791.33	1062.83	819.25	761.5	966.67	1202.75	1398.42	771.83	995.42	813.25	1097.33	962.164	51.9138	17.477			167	944.33	854.67	1283.67	726	811.25	912.92	934	863.33	1265.42	955.066	143.986	21.4248			167	723.33	825.92	1326.08
	168	870.08	1081.17	1001.92	1042	863.25	1018.33	718.75	762.42	950	814.25	845.17	802	1560.75	791.42	1079.17	816.75	754.17	971.5	1200.75	1372.5	764.58	1014.67	801.92	1092	957.897	47.6467	16.0405			168	994.75	853.75	1275.25	729.83	807.58	908.08	938.33	867.71	1264.75	960.003	148.923	22.1596			168	725.5	830.58	1326.33
	169	886	1089.08	997.83	1065.08	874.67	1029.83	709.58	768.92	966.67	815.08	838.58	806.75	1550.33	792	1082	806.25	757	969.83	1192.92	1381.83	759.42	990.58	794.67	1067.92	958.034	47.7842	16.0868			169	985.25	854.17	1260.67	717.33	810.08	915.42	939.08	866.63	1244.75	954.82	143.74	21.3883			169	724.67	813.58	1341
	170	871.58	1067.58	1012.17	1072.17	879.92	1028.75	717.5	766.33	964.08	815.17	831.17	800.33	1567	792.5	1088	833.5	749.17	988.58	1186.75	1388.08	765.67	1013.08	794.5	1061.08	960.611	50.3608	16.9542			170	986.42	863.17	1259.67	728.17	838.58	927.58	936.5	861.67	1251.58	961.482	150.402	22.3796			170	737.92	820.58	1332.67
	171	865.08	1076.17	1008.67	1065.42	881.08	1047.33	709.67	757.67	974.08	813.33	838.25	805	1548.17	821.75	1081.83	821.75	768.08	981.33	1187.08	1406.33	763.25	995.33	792.25	1032.42	960.055	49.805	16.7671			171	991.67	858.83	1267	725.58	828	915.83	940.67	860.25	1239.25	958.564	147.484	21.9455			171	726.92	824	1314.42
	172	865.83	1085.33	1019.58	1051.58	887.92	1044.5	718.33	755.5	965.5	815.67	839.25	789.25	1546.08	795.67	1090.92	823.5	752.42	987.17	1199.25	1423.08	766.67	1017.33	807.92	1033.25	961.729	51.4792	17.3307			172	1002.33	846.25	1273.67	725.42	838	922.5	945.75	859.96	1245.42	962.144	151.064	22.4782			172	733.08	814.58	1315.58
	173	878.67	1097.25	1000.5	1083.75	885.33	1048.67	709.5	754.58	970.58	836.42	854.75	797.67	1558.25	794.08	1108.58	828.5	748	995.17	1201	1404.67	762.25	992.17	799.08	1022	963.809	53.5592	18.031			173	1013.5	858.67	1264.17	717.25	828.33	927.08	943.42	864.21	1228.5	960.57	149.49	22.2439			173	735.67	820.83	1313.42
	174	899.42	1092.75	1001.75	1034	891.67	1054	707.08	761.58	966.5	818.08	849.83	797.92	1561.5	810.75	1118.83	831.5	763	998.33	1191.33	1427.67	861.08	1008.33	802.83	1021.17	969.621	59.3708	19.9875			174	1010.25	864.67	1276.58	730.83	834.92	931.67	931.33	868.88	1225.58	963.857	152.777	22.7329			174	719	809.5	1321.83
	175	871.08	1109.83	996.08	1058.67	898.42	1056.92	714.33	758.5	966.67	833.67	842.92	807.17	1528.25	786.58	1115.08	826.5	756.25	1067.75	1195.42	1424	768.83	994.75	799.08	957.75	963.938	53.6875	18.0742			175	1026.92	864.17	1252.75	727.67	843.33	942.58	918.67	857.67	1227.92	962.409	151.329	22.5175			175	723.5	819.58	1314.33
	176	872.83	1116.25	998.83	1028.92	888.75	1066.67	708.75	751.92	970.92	829.58	851.58	804	1539.58	802.42	1095.42	824.75	766.58	1052.83	1213.58	1429.33	768.33	997	792.17	930.5	962.562	52.3121	17.6111			176	1009.58	860.75	1287.5	716.25	842.67	946.5	923	848.92	1215.42	961.177	150.097	22.3342			176	722.67	826.83	1305.08
	177	864.83	1125.83	1016.75	1068.5	903.17	1064.17	725.75	752.75	967.5	821.75	843.58	806.5	1552.58	798.75	1089.75	830.33	764.08	1064.33	1209	1427	770.33	1007.58	825.08	1081.58	974.228	63.9779	21.5385			177	1001.25	878	1288	727.92	848.67	936	915.5	849.58	1224.75	963.297	152.217	22.6496			177	726.58	805.33	1300.75
	178	871.67	1110.33	1016.75	1040.92	897.25	1064.08	709.25	750.58	954.92	832	862.5	796.83	1532.17	802.42	1094.17	829.92	788.17	1038	1202.17	1437.83	765.08	1028.58	788	1084	970.733	60.4829	20.3619			178	1000.08	871.92	1256.58	722	849.33	946.08	927.42	847.54	1215.75	959.633	148.553	22.1045			178	730.25	816.17	1294
	179	872.58	1129.67	998.33	1077.75	903.25	1073.08	699.42	754.42	958.92	824	855.92	795	1531.25	804.5	1081.58	832.17	769.5	1072.17	1205.5	1427.5	767.58	1011.08	789	1088.67	971.785	61.535	20.7161			179	1014.08	872.17	1274	741.25	853.33	964.42	929.75	850.79	1213.08	968.097	157.017	23.3638			179	722.25	803.75	1296.33
	180	880.33	1133.25	987.67	1033.42	897.5	1074.17	707.5	750.17	954	825.75	845.75	787.58	1513.92	791.17	1101.33	838.17	767	1059.17	1202.17	1443.83	930.25	1019.92	792.83	1068.58	975.226	64.9763	21.8746			180	1017.92	876	1275.5	743	873.25	957.33	918.17	865.67	1202	969.871	158.791	23.6279			180	730.25	799.75	1292.67
	181	863.75	1147.08	1003	1066.58	906.5	1077.17	711.67	746.83	962.75	824.5	849.5	796.58	1514.08	787.83	1123.33	849.17	768.25	1070.92	1231.25	1461.33	770.33	1017.33	781.67	1096	976.142	65.8917	22.1828			181	1012.5	907.75	1276.33	734.42	865.42	945.33	934.75	853.71	1199.67	969.987	158.907	23.6451			181	718.67	811.33	1281.08
	182	863.75	1147.17	983	1031.58	904.5	1073.17	712.67	741	973.5	825	842	799.92	1519.83	803	1110.08	867.67	781	1076.5	1222	1443.67	765.5	1020.83	783.58	1098.92	974.577	64.3267	21.6559			182	1006.08	888.58	1274.25	741.33	858.75	955.25	920.67	859.83	1201	967.304	156.224	23.246			182	725.75	812.58	1300.25
	183	875.75	1155.92	996.75	1064.92	902.92	1069.58	705.92	751.25	971.08	818.67	834.92	809.33	1518.33	801.17	1114.5	853.83	768.75	1088.5	1240.08	1451.17	771.25	1013.5	799.33	1106.25	978.486	68.2362	22.9721			183	1003.5	887	1265	734.17	846.83	964	916.17	859.42	1203.42	964.39	153.31	22.8123			183	724.42	810.92	1273
	184	874.75	1148.17	975.25	1049.5	912.17	1086.42	694.75	746.42	968.92	825.83	842.33	803.5	1507.67	791.08	1124.17	841	764	1096.25	1219.25	1439.67	755.67	1022.75	794.33	1105.33	974.549	64.2992	21.6466			184	1012.83	904.83	1275	724.75	868	962.92	925.33	856.33	1192.5	969.166	158.086	23.5229			184	725.58	808.67	1297.08
	185	855.58	1167.83	980.5	1060.5	919.92	1079.75	703.17	747.42	976.25	829.67	854.33	780.75	1514.33	800.75	1126.92	850.25	820.67	1084.08	1225.08	1440.83	758.5	1026.5	782.33	1090.33	978.177	67.9267	22.8679			185	1015.17	904.67	1278.67	735.83	864.17	968.92	922.67	847.83	1182.5	968.937	157.857	23.4888			185	719.92	806.42	1280.33
	186	863.33	1170.33	969.5	1061.58	930	1072.92	690.67	745.58	973.08	820.42	839.58	787.83	1505.25	793.92	1130	855.33	778.08	1064.5	1238.67	1443.25	777	1006.5	797.5	1100.58	975.642	65.3917	22.0144			186	1004.75	905	1295.17	732.33	877.33	983.92	912.25	857.83	1161	969.953	158.873	23.6401			186	716.08	1040	1284.58
	187	862.5	1172.33	991.67	1076.67	921.5	1080.92	707	745.25	968.08	835.42	835.42	796.08	1509	790.92	1139.75	880	778.92	1103.58	1235.67	1438.92	767.75	1018.67	793.92	1110.67	981.692	71.4421	24.0513			187	1006	899.17	1287.5	730.42	871	965.5	909.25	855.92	1177.42	966.909	155.829	23.1871			187	711.42	820.08	1291.5
	188	873.5	1173	971.5	1063.08	932	1074.42	698.08	744.92	999	849	849.83	795	1505.08	802.58	1146.83	878.83	783.42	1076.08	1221.33	1430.5	765.83	1016.5	807.92	1109.42	981.985	71.7354	24.1501			188	1021.92	898.83	1279.92	733.25	881.58	984.25	903.58	844.08	1168.92	968.481	157.401	23.421			188	714.42	815.5	1286.33
	189	857.58	1195.25	977.83	1079	924.83	1081.92	757.25	733.33	971.5	843.58	855.75	801.17	1504.08	797.5	1147.17	860.5	776.58	1088.58	1226.33	1431.25	767.5	1022.33	804.58	1113.42	984.117	73.8671	24.8677			189	1004.08	907.33	1270.33	732.67	875.83	988.5	908.92	847.42	1193	969.787	158.707	23.6153			189	720	794.75	1279.25
	190	853.67	1198.17	978.83	1059.33	952.58	1077.75	694.08	737	973.33	841.5	852.83	791.17	1515.08	798.83	1174.92	866.33	771	1087.67	1242.83	1442.42	761.92	1014.75	802.5	1139.33	984.492	74.2425	24.9941			190	1010.83	908.25	1277.08	729.42	877.08	995.75	918.25	849.46	1165.08	970.133	159.053	23.6669			190	712.5	812.92	1279.17
	191	866.58	1190.58	991.58	1075.58	942.58	1082.25	682.17	742.5	983.58	833.58	839.42	786.83	1480.17	786.33	1148.25	858.83	777.92	1108.75	1239.58	1458.33	773.67	1014.42	819.17	1121.5	983.506	73.2562	24.6621			191	990.58	921.33	1279.67	727.25	881.92	988.33	903.5	849.71	1168.83	967.902	156.822	23.3349			191	709.17	802.17	1279.25
	192	875.17	1192.17	979.83	1057.33	952.5	1084.25	691.17	736.83	981.58	832.17	851.67	807.67	1502.67	797.5	1167.25	860.33	773.92	1097.75	1240.92	1450.5	763.83	1032.5	808.33	1137.25	986.462	76.2121	25.6572			192	987.58	893.58	1264.67	719.67	872.25	998.75	902.08	868.71	1163.67	963.44	152.36	22.6709			192	715.58	799.92	1274
	193	874	1207.08	984.75	1075.58	945.5	1083.08	678	728.92	992.75	836.83	849.83	797	1475.92	787.75	1183.08	882.58	773.5	1110.83	1241.67	1434	766.75	1022	816.58	1148.58	987.357	77.1067	25.9583			193	973.75	901.17	1282.33	738.42	878.17	999.67	904.08	856.63	1149.83	964.894	153.814	22.8874			193	706.42	796.25	1258.75
	194	873.92	1216.17	1742.92	1056.42	940.25	1070.33	688.83	726.25	973.5	834.33	854.92	806.75	1485.75	794.83	1167.08	861.33	764.08	1106.67	1260.25	1437.25	758.58	1035.5	822.25	1149.17	1017.81	107.555	36.2091			194	992.17	902	1264.58	729.33	885.17	1005.33	913.67	855.21	1129.75	964.134	153.054	22.7743			194	971.92	810.08	1259.08
	195	878.25	1216.58	980.92	1093.75	953.08	1080.08	685.58	719.25	982.5	839	864.33	789.67	1484.92	800.58	1178.25	886.92	793.33	1114.33	1260.92	1431.17	760.83	1023.58	820.83	1151.75	991.267	81.0167	27.2747			195	995.58	898.42	1276	745.33	885.83	999.83	907.92	857.17	1145.42	967.944	156.864	23.3412			195	714.08	804.33	1263.25
	196	875.58	1231.58	976.58	1068.33	958.75	1091.17	690	722.75	989.67	838.08	850.5	800.25	1485.75	805.67	1185.92	862.5	792	1126.83	1270.92	1447	764.17	1058	823.83	1114.92	992.948	82.6979	27.8407			196	983.33	893	1266.83	736	868.67	997	956	856.21	1152.92	967.773	156.693	23.3157			196	707.5	792.92	1257.25
	197	872.08	1240.92	975.75	1083.92	939.33	1079.33	687.67	722.58	985.92	841.5	854.92	801.58	1472	795.75	1197	883.08	789.08	1114.5	1269.08	1442	760.08	1031.33	819.83	1111.25	990.437	80.1867	26.9952			197	981.5	919.5	1279	748.83	882.75	1009.92	956.67	852.54	1150.17	975.653	164.573	24.4883			197	719.25	803.75	1258.67
	198	863.5	1237.92	951.33	1059.67	960.17	1077.42	684.92	717	1001.92	853.83	857.42	794.08	1480.5	793.33	1226.42	885.42	789.08	1116.67	1287.5	1440.33	767.5	1033.83	809.83	1102.67	991.344	81.0942	27.3008			198	992	894.83	1291.08	740.42	890.67	996.17	959.75	859.5	1131.33	972.861	161.781	24.0728			198	704.08	799.33	1271.5
	199	867.33	1268.33	966.33	1090.5	951.17	1058.42	676.17	714	982.08	834.17	860.92	788.5	1480.67	794.83	1207	892.58	795.42	1139.75	1267	1440.83	767.5	1045.58	809.33	1105.25	991.819	81.5692	27.4607			199	988.83	892.83	1270.17	741.75	921.92	1021.25	961.08	856.96	1136.33	976.791	165.711	24.6576			199	703.08	811.67	1261.5
	200	856	1258.58	959.17	1070.75	959.08	1073.67	676.25	717.67	1004.33	845.25	860.25	789.83	1471.5	791.92	1206.33	879.75	777.17	1146.08	1277.67	1447.33	761.08	1038.75	827.58	1107	991.791	81.5413	27.4513			200	979.58	885.75	1275.25	738.58	880.17	1014.92	960.33	853.54	1130.67	968.754	157.674	23.4617			200	707.42	799.5	1260.25
	201	871.17	1287.17	973.67	1083.83	967.33	1071	690.08	715.75	990.67	848.42	860.17	801.75	1475.5	791.75	1218.42	892.67	784.25	1149.08	1301.75	1474.08	770.33	1044.42	817.25	1094.58	998.962	88.7121	29.8654			201	979.75	874.92	1286.83	738.08	884.58	1032.25	964.58	852.04	1123.17	970.689	159.609	23.7496			201	701.67	795.67	1265.17
	202	874.83	1298.5	963.92	1077.17	964.17	1064	667.75	695.83	1009.92	847.25	866.5	793.42	1463.17	802	1220.58	884.08	778.83	1162.58	1312.17	1444.58	764.08	1062.92	832.67	1097.25	997.84	87.5904	29.4878			202	967	823.33	1268.33	733.92	889.58	1020.92	949.58	851.46	1128.33	959.161	148.081	22.0342			202	701.08	783.83	989
	203	870.5	1312.17	969.5	1115.42	954.08	1057.75	685.25	708.67	996.58	845.5	853.75	788	1442.67	800.67	1234.42	879.83	778	1168.33	1317.33	1457	776.25	1048.08	822.33	1089.25	998.805	88.5554	29.8126			203	965.25	824.67	1272.67	741.08	887	1024.75	969.67	853.88	1260.42	977.71	166.63	24.7943			203	710.83	797.92	1317.42
	204	881.5	1317.5	957.75	1092.92	956.75	1050.42	677.42	703.67	998.5	851.67	860.25	794.33	1476.17	787.92	1227.17	867.83	777.33	1161.67	1330.5	1429.67	762.58	1051.67	825.42	1094.08	997.279	87.0288	29.2987			204	959.58	818.25	1275.92	737.67	882	1033.67	968.42	854.08	1162.5	965.788	154.708	23.0203			204	703.33	807.25	1477.08
	205	847.42	1327.5	971.67	1097.5	987.33	1048.75	679.42	717.42	1001.67	854.58	854.92	789.58	1468.58	795.08	1249.25	864.17	770.08	1152.75	1345.75	1448.67	778.75	1050.83	819.5	1094.33	1000.65	90.3958	30.4322			205	950.33	824.25	1262.33	734.33	879.67	1035.42	949.67	868	1151.67	961.741	150.661	22.4181			205	711.83	798.08	1463.67
	206	865.5	1343.08	971.75	1081.08	969.25	1055	679.58	711.17	1016.83	845.33	847.33	801.17	1443.92	795.83	1254.42	878.92	753	1167.33	1333.92	1427.83	765.08	1064.42	839.58	1062.58	998.913	88.6625	29.8487			206	951.42	817.75	1266.83	734.08	888.17	1050.17	967.67	849.92	1147	963.668	152.588	22.7048			206	696.58	810.08	1461
	207	832.42	1358.33	969.42	1082	968.75	1052.75	687.08	713.33	1031.25	864	876.58	822.83	1460.33	795.42	1285.33	872.58	752.25	1184.75	1325.33	1429.58	777.83	1066.75	827.5	1066.33	1004.28	94.03	31.6557			207	945.67	824.08	1278.25	730.17	873.67	1026.25	956.42	863.04	1204.58	966.903	155.823	23.1863			207	704.5	539.92	1465.08
	208	827.83	1369.33	966.83	1080.33	983.92	1061.58	681.17	693.58	1016.75	857.25	858.92	792.92	1433.25	810.58	1252	872.33	763.08	1160.17	1343.33	1424	768.83	1063.33	823.08	1051.25	998.152	87.9017	29.5925			208	949.5	835.08	1261.92	731.33	889.42	1045.58	943.33	865.04	1188.42	967.736	156.656	23.3101			208	701.08	758.33	1467.33
	209	832	1373.67	963.67	1079.75	979.25	1049	681.17	700.58	1017.58	867.42	861.08	795.5	1456.25	787.92	1280.25	870.17	749.75	1164.92	1331.92	1429.5	772.08	1067.42	832	1051.67	999.772	89.5217	30.1379			209	952.67	827.08	1240	738.67	896.25	1049.83	949	860.33	1190.17	967.111	156.031	23.2172			209	711.42	768.17	1472.08
	210	841.75	1393.5	965.17	1090.5	991.42	1061.25	689.5	698.17	1034.58	858.83	854.17	796.25	1459.33	797.67	1261.67	872.33	753.25	1173.42	1346.08	1450.08	769.58	1061.5	841.17	1045.08	1004.43	94.1771	31.7052			210	949.25	833.08	1263.67	731.92	876.17	1044.25	959.75	861	1192.33	967.936	156.856	23.3399			210	702.83	758.08	1468.92
	211	835.33	1397.67	956.25	1054.42	982.25	1052.08	691.25	695.17	1049.33	871.33	849.58	795.83	1440.67	792	1277.75	899.92	744.92	1171.75	1363.83	1432.08	767.67	1053.17	846.75	1031	1002.17	91.9167	30.9442			211	964	830.25	1250.5	737.75	896.5	1072.67	957	861.88	1192.58	973.681	162.601	24.1948			211	698.67	759.92	1472.17
	212	842.25	1401.83	964.92	1091.92	978.67	1055.75	679.17	705.75	1035.67	870.75	850.08	788.92	1453.92	782.25	1285.42	881	788.92	1167.08	1355.17	1424.08	769.42	1063.83	845.33	1025.17	1004.47	94.2196	31.7195			212	955.33	841.75	1255.83	724	899.33	1066.25	972	861.42	1132.83	967.638	156.558	23.2956			212	704.5	774	1471.25
	213	836.67	1426.67	953.42	1063.17	972.33	1041.5	688.58	691.58	1044.08	870.83	848.58	790.17	1458	803.58	1302	892.75	801.67	1184.58	1348.58	1420.83	766.08	1067.58	837.83	1026.58	1005.74	95.485	32.1455			213	954.25	815.5	1240.83	734.25	883.25	1071.67	954.92	859.13	1119.92	959.302	148.222	22.0552			213	697.17	749.75	1471.25
	214	837.33	1428.67	971.5	1095.92	983.08	1050.67	692.83	698.17	1048.67	869.42	850.08	789.83	1440.25	800.5	1315.75	868.58	803.17	1174.42	1353.75	1421.75	767.83	1061.33	835.42	1007.67	1006.94	96.6912	32.5516			214	1001.25	827.83	1248.75	734.75	894.25	1075.58	944.83	864.17	1138.5	969.99	158.91	23.6456			214	708	758.75	1336.25
	215	853.75	1415	968.17	1058.5	989.25	1054.83	671.92	703.08	1045.33	1015.5	856.42	805.33	1431.75	801.33	1332.42	923	806.5	1180.67	1355.17	1428.17	770.25	1092.25	841.17	991.17	1016.29	106.039	35.6985			215	1007.25	823.58	1236.67	748.75	884.08	1062.08	950.92	857.04	1120.75	965.68	154.6	23.0042			215	683.5	762.83	1343.83
	216	837.08	1447.58	973.25	1094.58	973.75	1054.25	677.33	692.75	1049.75	1026.17	848	789.83	1425.67	801.25	1352.25	894.08	798.83	1157.08	1369.25	1428.92	762	1083.17	832.67	974.75	1014.34	104.093	35.0435			216	1023.5	813.67	1236.5	745.25	904.33	1049.5	947.33	872.54	1118.33	967.883	156.803	23.3321			216	678.33	765.92	1341.92
	217	837.75	1431.5	967.42	1080.75	991.75	1057.67	664.25	692.5	1052.67	1016.67	850	785.83	1444.67	796	1368.92	923.08	788.08	1161.5	1393.25	1412.25	767.5	1079.67	841.67	960.5	1015.24	104.994	35.3467			217	1002.75	834.83	1227.83	740.67	892.58	1046.58	954.5	863.5	1120.25	964.832	153.752	22.8781			217	683.58	763.92	1340.42
	218	838.92	1448.92	974.33	1128.42	990.42	1058.17	676.83	690.33	1053.83	1022.92	853.75	790.17	1447	793.67	1381.67	913.58	810.58	1149.67	1369.33	1415.58	767.33	1085.08	827.33	971.75	1019.15	108.899	36.6614			218	1002.83	826.75	1205.33	736.58	902.25	1071.42	933.75	872.13	1129.42	964.496	153.416	22.828			218	658.42	768.5	1344.08
	219	854.75	1466.83	947.5	1110.75	988.25	1041	674.33	692.42	1047.42	849.17	844.67	798.75	1437.83	799.5	1393.08	924.25	787.5	1154	1409.08	1430.75	775	1067.25	834.83	970.08	1012.46	102.208	34.4088			219	1022.17	814.5	1210	743.5	903.08	1058.83	944.17	861.88	1128.75	965.209	154.129	22.9341			219	683.25	775.92	1348.75
	220	860.17	1456	1000.75	1113.83	989.75	1056.67	667.33	691.08	1060.58	853.67	853.75	810.83	1429.58	804.17	1405.25	915.92	801.08	1162.17	1412.42	1422.67	784.75	1079.92	851.75	966.83	1018.79	108.538	36.54			220	1021.5	825.5	1200	726.83	905	1069.08	944.5	864.83	1118.75	963.999	152.919	22.7541			220	695.92	785.58	1321.75
	221	861.5	1455.5	1003.17	1070.58	1007.5	1047.33	666.83	684.92	1048.75	853	857.08	802.58	1418.25	806.75	1409.92	916.08	805.08	1148.58	1441.08	1424.92	776.33	1086.83	844.08	963.42	1016.67	106.419	35.8265			221	1013.17	831.33	1200.67	728.5	905.25	1045.25	939.92	863.96	1116.67	960.524	149.444	22.2371			221	686.67	784.5	1332.75
	222	847.83	1472.33	1016.67	1120.5	1006.75	1078.08	694.25	689.92	1057.5	864.67	860.58	796.75	1395.5	788	1429.67	911.33	809.67	1119.33	1426.17	1438.67	778.42	1075.92	836.33	953.5	1019.51	109.264	36.7843			222	1023.5	817.83	1188	726.5	895.5	1045.92	927.67	873.83	1112.33	956.787	145.707	21.6809			222	699.17	776.75	1331.5
	223	840.92	1456.67	997.42	1089.42	994.83	1046.83	691.17	685	1046.42	857.17	856.67	793.67	1409	810.83	1439.25	918	805.17	1137.5	1446.17	1435.25	766.58	1085.25	840.08	968.42	1017.4	107.154	36.0738			223	1010.75	810.67	1190.08	728.92	910.42	1052.92	943.83	866.92	1097.42	956.881	145.801	21.695			223	687.58	776.92	1327.08
	224	861.92	1468.75	1010.17	1117.42	1005.92	1052.83	695.92	702.08	1070.75	870.58	838.75	796.67	1403.25	793.33	1434.08	910	803.58	1130.67	1450.67	1452.08	782.92	1074.5	843.08	967.75	1022.4	112.153	37.7568			224	1004.67	813.83	1184.17	731.33	898	1058.67	938	871.75	1089.58	954.444	143.364	21.3324			224	692.92	788.5	1320.5
	225	861.25	1465.08	1005.67	1101.83	1004.08	1054.92	696.33	699.25	1065.58	860.92	855.5	790.42	1404.42	796.17	1435.25	909.92	802.58	1137	1460.92	1440.25	773.83	1076.83	834.58	960.75	1020.56	110.305	37.1349			225	1006.67	803.5	1181.33	725.67	900.75	1062.67	919.58	864.25	1087.25	950.186	139.106	20.6987			225	690.75	789.67	1321.92
	226	857.33	1475.67	1005.92	1126.5	1027.42	1074.67	700.58	705.25	1066.75	856.25	856.42	784.5	1405.25	788.75	1434.75	902.75	804.83	1111	1473.92	1455.92	785.33	1076.08	844.83	974	1024.78	114.528	38.5564			226	979	807.08	1178	782	903.17	1068.08	918.25	859.21	1091.67	954.051	142.971	21.2739			226	713.25	797	1322.92
	227	849.92	1455.33	995.83	1112.75	1022.92	1064.92	695.5	696.33	1065.92	870.75	848.67	789.17	1411.08	799.83	1445.58	921.67	824.58	1144	1492.33	1450.5	778.83	1082.08	842.67	969.33	1026.27	116.02	39.0589			227	991.58	909.5	1167.92	782	904.08	1051.17	923.17	868.33	1096.17	965.991	154.911	23.0505			227	705.33	785.17	1347.17
	228	850.25	1480.75	1015.75	1132.42	1027.58	1054.08	696.83	704	1057.67	870.25	865.25	802.5	1395.5	796.75	1450.33	915.75	802.17	1122.08	1482.17	1451.67	783.08	1082	855.67	964.08	1027.44	117.191	39.4529			228	998.17	899.75	1175.58	801.83	923.42	1063	910.42	868.75	1075.25	968.463	157.383	23.4184			228	699.67	788.25	1328.92
	229	848.92	1496.17	1014.42	1084.42	1027.25	1061.5	711.25	692.67	1065.58	862.17	860.75	816.42	1388.83	798.58	1477.5	923.67	810.58	1131.42	1488	1467.33	766.5	1071.08	839.83	1023.92	1030.37	120.115	40.4373			229	968.75	902.92	1170.5	785	902.5	1071.58	922.83	859.42	1086.92	963.38	152.3	22.662			229	698.67	793.5	1327.83
	230	848.08	1499.58	1016.58	1132.5	1024.33	1069	707	694.75	1082.67	862.08	860.75	793.75	1394.08	790.58	1490.58	919.75	807.33	1125.5	1504.5	1464.83	771.25	1073.58	863	1000.75	1033.2	122.95	41.3917			230	974.42	910.75	1156.75	774.83	926	1074.58	916.42	872.38	1090.33	966.273	155.193	23.0925			230	703.33	792.25	1315.92
	231	840.42	1486.58	992.5	1115.75	1037.75	1065	714.58	703.08	1080.83	874.92	844.5	787.83	1378.83	787.33	1486.33	932.33	803.08	1131.75	1497.92	1469.42	772.83	1090.92	900.25	1020.75	1033.98	123.728	41.6538			231	981.92	902.42	1156.33	786.25	917.58	1061	930.17	866.13	1083.5	965.033	153.953	22.908			231	698.33	789.67	1324
	232	860.17	1485.83	1019.42	1114.67	1039.25	1074.08	716.92	709.17	1072.08	872.33	842.42	805.75	1387.5	804.33	1487.5	932.67	793	1125.17	1534	1478.42	788.75	1067.67	853.67	1021.17	1036.91	126.664	42.6421			232	953.58	892	1156.58	801.92	909.42	1074.58	933.33	865.5	1064.25	961.24	150.16	22.3436			232	708.25	797.08	1313.33
	233	847.58	1498.83	1013	1126	934.92	1072.58	720.42	693.25	1085.75	869.5	807.42	781.67	1399.83	791.08	1524	931.75	803	1138.83	1575.08	1462	785.5	1081.67	876.25	1009.75	1034.57	124.319	41.8527			233	971.25	888.42	1140.25	793.08	917.75	1076.08	919.08	864.92	1071.33	960.24	149.16	22.1948			233	702.25	793.08	1317.92
	234	858.83	1487.17	1012.33	1141.92	942	1079	713.58	701.67	1089.33	846.08	817.92	794.25	1386.83	843.92	1502.08	930.5	813.25	1136.42	1560.67	1470.67	832.33	1071	865.08	1013.75	1037.94	127.691	42.9878			234	947.92	889.83	1133.17	795.58	927.25	1070.5	919.92	867.75	1070.5	958.047	146.967	21.8684			234	707.58	792	1310.17
	235	850	1500	999.67	1119.5	947.83	1064.92	709.25	700.25	1088.33	868.92	803.58	791.42	1392.42	845.25	1501.92	929.75	794.5	1101.92	1555.5	1464.67	785.33	1084.83	850.5	1019.08	1032.06	121.806	41.0065			235	936.17	893.08	1120.67	784.5	917.5	1075.75	926.75	864.17	1071.58	954.463	143.383	21.3352			235	701.08	797.92	1295.5
	236	857.92	1508.83	1013	1139.5	1001.25	1075.83	719.42	699.33	1100.83	877.5	805	791.17	1386.17	851.58	1510.42	920.92	807	1118.5	1539.42	1492.92	789.67	1089	857.92	1021.5	1040.61	130.358	43.8858			236	925.5	882.67	1128.58	786	926.08	1063.83	910.58	866.08	1061.17	950.054	138.974	20.6792			236	701.75	620.17	1309.25
	237	854.08	1510.33	1025.5	1082.5	982.75	1082.92	726.75	693.75	1105.67	871.17	806.83	795.75	1380.92	839.33	1514.25	937.67	807.67	1133.67	1576	1430.42	785.25	1098.25	858.08	1043.67	1039.3	129.049	43.445			237	915.08	889	1120.83	800.75	915.33	1082.17	922.08	869.63	1079.17	954.893	143.813	21.3992			237	708.67	626.42	1309.08
	238	860.17	1513.75	1030.42	1123.42	987.5	1073.75	722.08	703.5	1098.75	860.83	799	786.33	1376.75	854.33	1521.42	930.42	799.92	1122	1574.92	1490.25	781.33	1095.25	869.25	1047.83	1042.63	132.382	44.5671			238	920.83	881.75	1141.75	786.58	917.17	1094.17	921.17	860.88	1076.5	955.644	144.564	21.511			238	702	628.5	1312.5
	239	863.08	1520.83	1031.08	1096.5	983.83	1065	727.83	702.08	1100.08	878	803.33	781.5	1385.67	845.42	1510.58	922.33	801.25	1117.75	1568.83	1526.75	805.33	1105.33	863.17	1049.83	1043.97	133.724	45.0189			239	924.75	883.58	1126.75	796.5	932.17	1090.25	911.42	859.04	1068.25	954.746	143.666	21.3772			239	708.08	627.75	1309.83
	240	856.17	1527.83	1033	1126.67	995.08	1065.33	731.58	701.92	1103.33	868.83	797.5	792	1367.08	852.25	1518.5	929.25	806.33	1119.08	1589.08	1545.33	794.17	1093.67	805.75	1048.92	1044.53	134.277	45.2051			240	920.5	879.58	1112.08	799.33	917.42	1084.25	910.08	857.88	1063.83	949.439	138.359	20.5876			240	703.58	637.25	1312.33
	241	849.42	1524.42	1021.17	1118.25	1006.75	1064.83	688.5	696.42	1104.5	872.5	800.25	800	1373.92	841.17	1516.17	930.67	804.33	1119.5	1598.33	1522.58	799.25	1095.75	813.33	1073.17	1043.13	132.882	44.7356			241	908.25	891	1105.58	794.42	932.92	1099.75	918.17	860.54	1059.08	952.19	141.11	20.9969			241	700.42	620.58	1292.92
	242	860.25	1531.58	1040.25	1151.83	1012.67	1056.67	672.67	691.25	1105.92	879.92	801.92	781.58	1381.25	850.42	1507	937.5	806.83	1125.25	1597.5	1544.92	788.58	1092.17	804.33	1124.25	1047.77	137.521	46.2972			242	899.83	872.92	1093.17	785.58	925.92	1097.58	905.67	854.54	1073.83	945.449	134.369	19.9939			242	712.17	642.25	1302.67
	243	857.25	1544.67	1033.58	1133.75	1018.17	1067.58	720.83	690.75	1111	880.5	805.25	794	1361.67	844.83	1513	932	802.58	1118.17	1604.25	1513.58	801.75	1096.5	814	1091.17	1047.95	137.701	46.3578			243	902.67	887.33	1085.08	786.75	937.83	1103.08	907.33	858.58	1073.42	949.119	138.039	20.54			243	711.08	628.25	1289.08
	244	872.67	1547.5	1029.08	1166.33	1021.17	1061.5	733.33	711.08	1099.75	885.58	800.25	795	1364.5	849.75	1515.17	937.25	807.67	1115.33	1599	1512.92	805.5	1085.75	824.5	1087.67	1051.18	140.927	47.4438			244	894.42	880.75	1094.33	780.08	947.58	1091.58	905.17	863.13	1067.83	947.208	136.128	20.2556			244	705.5	631.92	1300.08
	245	861.67	1554.92	1033.92	1135.92	1020.08	1077.5	730.75	695.33	1130.58	876.67	804.5	788.5	1362.17	849.25	1506.92	923	799.58	1126.83	1622.42	1532.58	792.33	1112.5	797.67	1103.92	1051.65	141.396	47.6018			245	899.17	879.5	1092	798.08	941.92	1095.83	896	856.25	1068.33	947.453	136.373	20.2921			245	701.83	630.67	1285.25
	246	855.25	1536	1014.58	1163	1020.33	1067.08	726.17	710	1117.33	881	792.33	791.58	1365.25	853.25	1514.75	927.75	813.58	1127.83	1616.67	1504.17	799.75	1117.17	800.08	1092.92	1050.33	140.076	47.1572			246	885.75	885.25	1098.25	796.67	930.33	1105.58	910.25	855.33	1042.17	945.509	134.429	20.0028			246	696.58	638.33	1286.25
	247	863.42	1549.67	1036.42	1038.58	1031.25	1051.08	723.75	698.5	1107.5	885.17	794.58	774.33	1376	852.08	1517.75	926.25	823.58	1146.42	1614.67	1513.67	811.92	1104.75	806.58	1108.58	1048.19	137.938	46.4373			247	896.25	884.92	1078.58	781.33	933.67	1093.83	906.92	851.92	1069.17	944.066	132.986	19.788			247	708	635.25	1293.25
	248	871.08	1545.5	1022.25	1002.5	1041.75	1062.67	724.75	696.5	1117.75	881.83	806.58	817.92	1344.08	841.17	1514.5	941.5	817.25	1166.33	1631.08	1526.83	797.83	1102.33	827.5	1105.33	1050.28	140.034	47.1431			248	876.33	881.33	1074.83	791.5	944.25	938.25	910.5	856.67	1049.75	924.823	113.743	16.9248			248	699.33	636.42	1305.42
	249	847.83	1575.75	1039.75	1020.25	1032.58	1064.08	720.25	704.83	1105.83	880.75	809.5	809.58	1356.75	851.83	1501.75	928.42	826.67	1158.17	1618.17	1529.25	804.75	1086.08	818.33	1114.67	1050.24	139.993	47.1292			249	864.5	902.58	1069.58	793.08	945.75	1088.08	900.42	850.83	1070.92	942.86	131.78	19.6087			249	706.25	634.17	1292.17
	250	857.5	1568.67	1013.42	999.67	1052.92	1073.08	724.33	694.83	1114.25	883.83	800.17	812.5	1351	850.33	1520.67	919.5	828.42	1164.25	1628.75	1528.92	801.33	1096	823.08	1112.42	1050.83	140.577	47.3258			250	857.83	876.58	1078.58	787.92	947.58	1082.42	900.83	850.25	1073.33	939.48	128.4	19.1057			250	718.58	640.25	1290
	251	860.83	1565	1032.92	1019.25	1058.58	1061.42	724.25	701.67	1126.92	896.17	802.83	809.92	1352.83	853.42	1493.58	917.17	821.5	1170.58	1661.25	1511.83	796.5	1108.67	810.25	1097.08	1052.27	142.018	47.8109			251	853.83	889.75	1100.75	794	928.17	1094.58	902	849.96	1073	942.893	131.813	19.6136			251	712.42	641.42	1287.83
	252	869.08	1555.17	1031.33	1211.5	1055	1056	730.17	701.33	1120.08	882.67	816.75	806.17	1325.83	842.83	1506.25	928.83	825.67	1178.08	1658.08	1499.75	795.58	1098.67	822.25	1087.25	1058.51	148.263	49.9136			252	848.25	887.5	1076.75	790.17	944.17	1104.92	891.83	844.63	1059.33	938.617	127.537	18.9773			252	713.75	631.92	1288.33
	253	874.42	1556.83	1033.83	1194.67	1073.5	1053.17	724.5	699.42	1130.33	881.42	811.42	803.58	1340	843.67	1498.33	928.08	832.83	1185.25	1680.08	1516.92	811.58	1104.17	824.92	1074.08	1061.54	151.292	50.9331			253	846.33	888.17	1023.67	780.75	947.83	1104.83	895.67	849.79	1055.75	932.532	121.452	18.0719			253	704	635.58	1285
	254	884.42	1561	1045.25	1165.17	1079.67	1042	695.58	701	1119.83	892.17	790.92	811	1340.17	848.58	1493.17	924.17	833.42	1194.75	1675.75	1510.67	813.75	1098.83	825.92	1077.08	1059.34	149.095	50.1934			254	842.33	892	1151.67	779	938.17	1088.67	885.25	845.29	1047	941.042	129.962	19.3382			254	707.92	758.25	1288.83
	255	878	1559.67	1050.83	1154	1092.5	1035.33	721.67	702.5	1130.58	883.08	806.67	805.17	1327.5	852.67	1495.92	917.08	831.25	1199.5	1702.08	1486.75	815.25	1103.08	813.33	1057.92	1059.26	149.014	50.1662			255	843.25	909.17	1147	800.42	938	1100.75	891.33	848.46	1051.08	947.718	136.638	20.3315			255	708.5	850.17	1265.83
	256	867.08	1563.17	1010.33	1139.92	1093.5	1041.92	723.75	710	1108.5	915.42	809.08	794.42	1351.42	844	1367.17	923.25	826.25	1190.67	1707.5	1492.42	816.42	1115.58	822.67	1056.08	1053.77	143.522	48.3173			256	834.67	900.33	1173.5	784.42	933.83	1109.33	882.92	840.13	1051.33	945.607	134.527	20.0174			256	771.58	817.5	1280.25
	257	874.17	1581.67	1024.58	1182.58	1087.75	1039.58	728.42	711.67	1142	905.17	795.58	794.42	1328.5	849.5	1366.08	939.08	836.58	1183.42	1728.42	1489.92	815	1117.67	813.83	1047.33	1057.62	147.372	49.6134			257	837.17	893.25	1135.08	796.17	955.92	1107.42	887.67	844.29	1042.83	944.422	133.342	19.8411			257	716.83	830.5	1288.83
	258	873.5	1576.5	1022.33	1158.58	1102.33	1046.75	717.67	709.67	1126.75	908.67	798	803.33	1324.17	871.67	1371.42	934.67	829.25	1192.92	1730	1481	809.42	1112.67	825.25	1039.17	1056.9	146.654	49.3717			258	835.25	896.75	1139.25	785.33	941.58	1091.5	878.92	851.33	1036.92	939.648	128.568	19.1307			258	716.33	841.83	1284.08
	259	863.17	1572.25	1031.25	1181.17	1080.5	1049.33	717.17	707.25	1133.92	885.08	795.08	805.17	1324.08	844.83	1472.92	910.08	828.58	1198	1720.08	1484.17	810.25	1102	829	1035.75	1057.55	147.295	49.5876			259	840.08	910.5	1050.5	797.5	949.58	1147.67	875.5	841.54	1041.08	939.328	128.248	19.0831			259	715.92	831.17	1284.08
	260	861.67	1589.83	1028.25	1154.17	1088.67	1049.42	714.92	710.75	1128.92	905.25	801.92	792.58	1326.92	841.67	1471	925.25	813.75	1197.75	1715.67	1483.83	823.75	1104	827.5	1018.92	1057.35	147.098	49.5214			260	854.42	911.25	1076.17	776.08	947.08	1129.42	892.5	842.83	1036.92	940.741	129.661	19.2934			260	730.58	834.67	1265.5
	261	862.83	1578.92	1033.83	1186.75	1082.42	1048.83	718.33	698	1160.67	911	799	804.17	1327.75	846.42	1447.67	924.75	814.67	1231.17	1753.08	1468.58	813.5	1115.42	812.33	1024.42	1061.02	150.771	50.7579			261	848.75	916.5	1035.5	773.25	944.17	1138.17	886.42	834.5	1030.58	934.204	123.124	18.3207			261	721.17	829.25	1260.92
	262	869.08	1585.75	1020.5	1175.08	1094	1051.33	735.42	701	1154.67	911	823.42	799.58	1321.33	855.25	1459.58	913.83	827.83	1224.08	1728.42	1476.92	828.33	1123.33	824.92	1013.83	1063.27	153.02	51.5149			262	841.33	903.17	1036	782.58	951.83	1144.75	892.17	850.63	1039.58	938.004	126.924	18.8862			262	727.17	844.67	1268.33
	263	876.17	1601.83	1034.5	1186.17	1081.58	1048.25	723.67	711.42	1160.08	894.92	794	817.92	1298.33	850.33	1436.08	916.25	827	1204.42	1753.25	1472.75	830.75	1121.08	831	1012.5	1061.84	151.594	51.0348			263	842	904.75	1047.58	782.25	956.92	1132	889.58	839.75	1029.42	936.028	124.948	18.592			263	743	853.33	1272.75
	264	861.33	1576.75	1039.17	1191.42	1095.42	1067	730.67	718.17	1150.58	918.17	796.42	811.92	1322.58	860.17	1468.75	956.67	809.25	1214.67	1766.58	1471.42	838.17	1128.5	831.83	1003.83	1067.89	157.643	53.0714			264	840.92	903.25	1045.67	801.17	963.08	1144.83	878.08	842.25	1041.58	940.092	129.012	19.1968			264	733.5	847.42	1329.08
	265	866.08	1580.25	1031.42	1224	1102.67	1048.17	726	712.58	1160.17	926.08	791.58	815	1307	838.67	1450.42	948.67	809.92	1227.42	1777.08	1471.92	817.25	1128.58	820.42	1023	1066.85	156.598	52.7195			265	856.08	914.83	1042.83	780.75	956.92	1118	885.5	843.92	1046.42	938.361	127.281	18.9392			265	729.75	842.33	1328.17
	266	883	1579.67	1020.67	1203.25	1105.33	1052	717.92	715.58	1169.08	914.67	796.33	806.17	1298.75	850.25	1443	955.08	814.33	1200.92	1760.08	1443.75	837.92	1134.42	835.67	1035.5	1065.56	155.306	52.2845			266	848.83	916.42	1051.17	781.17	964.42	1141.75	885.25	842.21	1021.83	939.228	128.148	19.0682			266	732.33	839	1325
	267	884.5	1575.42	1019.08	1217	1098.58	1064.25	728.17	719.33	1176.17	932.75	795.75	829	1308.08	862.42	1447.17	945.58	819.67	1223	1764.83	1474.92	840.17	1133.42	833.58	1017.83	1071.28	161.028	54.2109			267	892.25	917.92	1044.67	784	961.08	1119.75	886.58	846.83	1039.08	943.573	132.493	19.7148			267	726.5	859.83	1332.83
	268	884.5	1586.5	1039	1164.5	1117	1070.08	730.67	741.67	1176.33	934.58	797.08	803.08	1306.83	863.5	1438.17	956.92	804.42	1239.67	1762.42	1443.75	838.42	1145.25	837.83	1036	1071.59	161.34	54.3161			268	883.75	918.33	1048.33	780.58	965.67	1134	868.58	842.79	1037.08	942.123	131.043	19.499			268	735	834.58	1324.5
	269	867.92	1597.75	1032	1206	1112.17	1059.17	733.33	736.75	1178.67	935	789.33	802.58	1283.83	851.92	1432.33	957.08	802.5	1248.33	1785.92	1457.25	827.67	1154.08	826.83	1025.67	1071	160.753	54.1184			269	900.17	903.75	1040.92	789.5	964.83	1133.92	894.75	837.25	1026.67	943.529	132.449	19.7082			269	724.33	842	1340.92
	270	864.25	1577.08	1024.67	1187.42	1126.25	1056.33	735.5	741.17	1200.67	904	781.5	799	1292.25	857.58	1439	965.25	809.08	1252.08	1781.08	1447	854.92	1151.42	834.67	1023.08	1071.05	160.802	54.1348			270	904.75	908.25	1034	789.83	962.75	1133.83	882.08	836.04	1019.25	941.198	130.118	19.3613			270	729.67	856	1273.17
	271	880	1586.33	1036.17	1219.58	1132.5	1059.5	727.42	733.92	1178.67	906.67	793.42	799.92	1297.25	768.83	1424.92	951.17	801.25	1254.92	1789.25	1457.5	853.83	1152.08	822.83	1011.58	1068.31	158.063	53.2127			271	886.33	903.33	1035.92	796.17	981.33	1125.08	875.83	834.58	1018.83	939.711	128.631	19.1401			271	730.75	848	1277
	272	867.42	1573.17	1018.42	1183.17	1113.92	1065.33	724.08	731	1180.75	904.5	801.58	820.5	1275.83	763.5	1418.17	941.42	802.83	1251.33	1813.58	1441.17	861.33	1141.5	828.42	1012.25	1063.97	153.715	51.7491			272	897	916.25	1027	792	991.67	1133.67	888.42	834.04	1011.92	943.552	132.472	19.7117			272	734	847.75	1277.17
	273	886	1566.42	1024.92	1221.25	1139	1065.67	724.58	734.67	1203.33	909.67	812.67	805	1282.5	770.92	1417.17	939.75	802.58	1266.25	1809.58	1439.17	836.42	1147.67	836.75	1006.58	1068.69	158.438	53.3391			273	908.08	906.25	1021.08	800	973.92	1130	872.75	844.92	1032.92	943.324	132.244	19.6778			273	724.75	856.75	1282.92
	274	873.83	1581	1014.75	1182.67	1133.58	1068.33	725.58	732.33	1204.67	916.92	784.08	805.83	1282.92	771.67	1425.17	949.58	796.75	1268.17	1815.92	1437	854	1139.58	837.5	1011.42	1067.22	156.969	52.8443			274	941.75	900.17	1020.83	798.58	987.25	1126.17	871.75	834.83	1027.58	945.434	134.354	19.9917			274	730.67	852.92	1271
	275	884.58	1558.08	1023.67	1235.42	1121.92	1069.5	722.75	743.42	1191.25	901.33	793.08	815.58	1279.67	769.67	1406.83	936.08	813.25	1271.67	1858.17	1434.75	855.17	1167.92	819.5	995.58	1069.53	159.285	53.6241			275	945.33	901.5	1018.5	806.92	974.33	1120.67	892.33	836.75	1023	946.592	135.512	20.164			275	725.92	858.75	1333.83
	276	879.67	1563.25	1022.67	1194.58	1130.92	1073.25	735.08	752.33	1176.58	919	801.08	805.75	1265.33	773.92	1421.33	951.08	787.75	1264.25	1872.75	1449.67	848.33	1147.25	853.67	998.17	1070.32	160.069	53.8881			276	980.17	924	1028.5	795.5	967.58	1132.67	884.83	840.58	1029.25	953.676	142.596	21.218			276	732.75	859.25	1324.83
	277	881.75	1555.83	1027.33	1232.92	1129.58	1067.92	727.92	756.08	1204.75	919.83	794	802.67	1266.83	781.25	1412.5	934.17	780.67	1260.42	1870.42	1443.08	870.92	1153.25	847.83	1009.83	1072.16	161.906	54.5065			277	1006.5	909.17	1007.5	816	972.58	1126.5	876.42	840.29	1032.75	954.19	143.11	21.2945			277	734.83	856	1320.33
	278	894.08	1564.08	1008.92	1195.17	1131.42	1077.08	735	730.58	1198.67	928.67	805.42	809.83	1272.75	780.67	1415.67	939.42	840	1278.25	1893	1440.5	854.33	1137.17	842.75	1000.83	1073.93	163.678	55.1028			278	1005.92	917	1005.5	812.42	961.42	1116.67	884.33	839.75	1028.33	952.371	141.291	21.0239			278	723.58	863.33	1324.17
	279	883.92	1543.33	1017.08	1222	1122.5	1078.5	731.42	750.83	1192.25	920	786.42	806.33	1262.25	773.67	1409.33	953.58	792	1278.58	1904	1425.08	871.42	1152.58	839.58	1016.5	1072.21	161.965	54.5262			279	1027.17	906.67	1000.92	816.5	983.25	1114.42	871	835.33	1037.33	954.732	143.652	21.3752			279	734.33	770	1312.75
	280	892.25	1549.08	1018.67	1221.75	1131.75	1075.08	734.92	741.92	1188.17	927.58	777.92	788.25	1250.25	775.75	1418.42	952.67	781.58	1264.17	1900.5	1422.67	886.33	1150.67	864.42	1020	1072.28	162.032	54.5489			280	1041.83	924.58	1003.17	806.25	978.42	1107.17	888.08	834.29	1032.42	957.357	146.277	21.7657			280	730.08	871.67	1318.75
	281	886.42	1549.25	1030.33	1249.17	1131.75	1068.67	734.17	743.83	1224.75	929.5	785.83	810.58	1247.42	781.58	1405.25	938.08	787	1250.67	1922.75	1424.08	867.92	1155.92	831.08	1010.67	1073.61	163.361	54.9964			281	1025.58	899.25	1004.42	803.25	978.33	1107.33	876.25	845.38	1008.83	949.847	138.767	20.6483			281	737.75	923.83	1319.58
	282	898.58	1551.92	1008	1247.83	1132.92	1080.83	744	750.58	1198.25	943.42	789.5	809.5	1231.67	774.17	1407.5	937.83	781.58	1267	1925.83	1428.5	875.25	1151.92	837.67	1013.58	1074.49	164.243	55.2932			282	1032.08	916.42	994.17	816.83	995.67	1126	880.08	834.21	1024	957.718	146.638	21.8195			282	724.92	920.17	1318.92
	283	890.75	1535.5	1034.58	1259.33	1145.67	1079.42	743.33	747.67	1214	933.33	792.25	798.92	1238.17	788.67	1395.42	935.83	768.17	1254.75	1936.5	1421.33	863.83	1148.83	838.83	1015.75	1074.2	163.951	55.195			283	1006.83	925.75	1001.17	816.92	997.17	1111.33	875.17	848.96	1020.25	955.95	144.87	21.5564			283	731.17	925.17	1328.5
	284	902.75	1546.58	1031.83	1224.67	1135	1068.33	742.08	751.25	1198.25	925.75	782.25	812.08	1250.42	794.33	1395.42	932.67	764.83	1265.25	1944.83	1413.83	887	1158	841.42	1013.92	1074.28	164.031	55.2218			284	986	912.58	988.75	827.83	994.33	1114.58	872.58	834.75	1002.58	948.22	137.14	20.4062			284	734.92	939.42	1324.58
	285	892.42	1536.08	1021.33	1266.92	1146	1072.67	738.92	757.75	1200.5	947.08	790.08	811	1243.75	779.58	1408.75	958.17	779.25	1278.92	1957.92	1410.42	884.08	1165.58	841.25	1012.83	1079.22	168.969	56.8842			285	1020	921.67	1012.42	808.08	1012	1116.17	865.42	846.29	1017.25	957.7	146.62	21.8168			285	734.92	927.42	1330.17
	286	907.33	1524.17	1024	1248.67	1156.83	1095.25	746.67	752.25	1213.17	937.75	788.75	801.25	1221.17	795.75	1388.5	951.83	764.75	1246.83	1989.25	1416.83	898	1153.83	835.92	1030.08	1078.7	168.451	56.71			286	1024.42	923.17	1003.17	813.5	1017.83	1109.42	873.67	839.08	1006.08	956.704	145.624	21.6687			286	728.75	930.5	1315.75
	287	903.33	1523.92	1003.08	1271.42	1145.92	1072.92	733.17	753.25	1211.08	941.58	786.33	803.25	1212.5	787.92	1394.17	941.67	780.67	1247.25	1976	1410	894.25	1153.17	841.75	1014.5	1075.13	164.879	55.5074			287	1032.83	914	1015.5	821.92	1012.83	1114.92	860.25	844.92	1018.17	959.482	148.402	22.082			287	731.75	934.75	1306.42
	288	892	1538.67	1023.25	1241.42	1139.08	1077.33	750.92	753.58	1220.17	938.25	780.08	801.83	1236	798.08	1386.33	944.33	774.17	1266.25	2044.83	1417.58	899.42	1156.92	844.92	991.58	1079.87	169.625	57.105			288	1046.25	917.58	998.75	820.92	1024.75	1114.67	867.83	837.21	1004.33	959.143	148.063	22.0316			288	734.25	935.42	1290.58
	289	888.58	1544.08	1010.08	1278.5	1155	1085.42	743.42	763.67	1232.33	939.42	790.67	801.58	1226.42	796.25	1385.83	950.58	767.08	1252.5	2003.08	1416.92	899.42	1163.67	830.75	1010.83	1080.67	170.42	57.3727			289	1042.33	931.75	990.25	826.92	1022.17	1086.58	854.92	838.88	1013.33	956.348	145.268	21.6156			289	726.25	926.58	1296.25
	290	894.83	1532.42	1034	1255.5	1149.75	1085.5	703.83	756.83	1226.08	956.17	789.67	793.17	1230.83	814.17	1390.08	942.08	779.58	1246.5	1998.33	1397	898.17	1161.5	837.17	1015.33	1078.69	168.437	56.7052			290	1073.17	922.83	1001.5	830.33	1035.25	1097.83	859.92	842.13	875.13	948.677	137.597	20.4742			290	726	937.83	1308.75
	291	897.92	1524.75	1019.33	1282.5	1153.33	1081.25	655.83	749.08	1238.42	955.83	785.58	792.58	1225.42	815.83	1387.42	961.25	771.58	1248.5	1991.33	1400.83	905.92	1175.33	837.92	1000.17	1077.41	167.163	56.2761			291	1062.5	945.25	1012.25	810	1032.25	1086.83	877.58	847.25	898.04	952.439	141.359	21.034			291	728.67	954.42	1315.67
	292	902.75	1511	1023.58	1274.17	1167.75	1072.5	746	754.67	1228.75	951.75	778.58	808.83	1200.75	816.5	1390.67	950.75	767.92	1237.33	2009.25	1401.17	924.83	1152.5	845.33	1006.83	1080.17	169.923	57.2055			292	1084.42	920.92	999.25	808.58	1041.75	1098.17	859.67	842.88	892.58	949.802	138.722	20.6417			292	727.92	952	1300.42
	293	900.5	1529.58	1024.58	1285.42	1154.33	1079.92	747.42	749.83	1234.17	949.75	783.58	805.17	1212.58	833.33	1395.92	965.92	745.92	1234.25	2011.17	1413.25	931.25	1162.33	844.08	999.75	1083.08	172.833	58.1852			293	1082.08	937.92	1005.67	810.83	1033.75	1085.5	869.92	846.46	894	951.792	140.712	20.9378			293	729.83	949.42	1310.67
	294	900.42	1514.08	1018.42	1273.83	1154.92	1081.17	749.33	752.75	1239.67	959.75	785.25	797.25	1194.42	831.58	1407.08	938.17	752.42	1165.58	2014.75	1408.83	949.42	1165.25	836.83	987	1078.26	168.007	56.5604			294	1105.42	939.08	999.83	820.42	1041.33	1091.08	846.5	843.08	892.08	953.202	142.122	21.1476			294	719.92	966.67	1289.75
	295	897.92	1524.83	1013.5	1266.33	1172.08	1085.67	740.25	776.08	1256.17	942.75	781.83	803	1185.42	824.83	1387.25	953.83	742.33	1221.33	2008.25	1415.58	941.17	1166.25	849.25	996.92	1081.37	171.118	57.6076			295	1122.42	943.75	983.58	805.92	1029.5	1087.58	840.83	847.96	937.17	955.412	144.332	21.4764			295	718.83	949.17	1301.92
	296	907.67	1502.08	1022.67	1282.67	1151.08	1085.33	742.5	763	1249.5	948.25	769.83	797.58	1205.5	836.92	1385.75	939.75	742.5	1255.58	2009.92	1399.17	936.5	1157.5	853.92	983.58	1080.36	170.115	57.2699			296	1115	942.5	1004.42	808.25	1033.33	1084.08	855.92	839.17	939.29	957.996	146.916	21.8608			296	735.5	950	1300.67
	297	897.75	1524.17	1017.75	1296.75	1167	1079.5	737.17	777.17	1260.67	957.75	790.42	806.92	1201.08	840.08	1390.17	974.83	760.5	1242.17	2001.5	1383.17	959	1155.92	845.25	993.25	1085.83	175.581	59.1102			297	1112.33	949.42	997.67	814.42	1039.17	1085.67	872	843.25	894.63	956.507	145.427	21.6393			297	722.92	967.42	1297.67
	298	904.83	1527.08	1016.08	1294.58	1153.42	1069.5	749.25	784.17	1259.5	964.83	781.17	801.25	1190.17	854.25	1405.83	947.17	753.25	1259.58	2016	1371.83	948.67	1169.42	841.92	989.42	1085.55	175.299	59.0152			298	1132	931.58	995.92	821.67	1043.42	1093.58	858.75	840.33	891.83	956.564	145.484	21.6479			298	720.83	957.58	1280.25
	299	924.5	1518.67	1011.08	1276.92	1149.67	1074.25	744	798.5	1267.25	954.42	774.08	802	1188.75	861.08	1407	950.92	745	1249.33	2012.25	1389.33	941.33	1171.67	844.33	996.5	1085.53	175.285	59.0104			299	1153.83	953.75	1015.92	836	1057.83	1078.33	849.25	839.79	889.33	963.781	152.701	22.7217			299	734.83	960.33	1282.83
	300	906.17	1512	1022.58	1282.5	1165.58	1094.58	745.25	801.83	1288.25	965.42	774.25	1045.75	1191.92	867.67	1385.92	969.75	743.58	1248.58	2019.25	1382.08	955.33	1171.25	849.67	977.75	1098.62	188.371	63.4161			300	1133.5	950.25	998.5	823.75	1054.42	1077.83	853.58	828.71	896.13	957.408	146.328	21.7733			300	740.33	948.08	1281.33
	301	909.42	1511.67	1003.5	1283.08	1186.17	1086.42	749.08	810.5	1292.92	968.33	766.25	784.92	1189.17	874.25	1390.58	962	747.5	1254.5	2006.75	1391.83	962	1151.83	849.67	977.75	1087.92	177.67	59.8136			301	1124.83	952.83	1001.33	818.33	1081.58	1087.75	845.67	840.04	895.58	960.882	149.802	22.2903			301	724.08	939.92	1274.17
	302	904.58	1501.5	1034.75	1286.25	1204.42	1078.92	758.67	817.5	1302.83	969.5	772.42	800.08	1173.25	871.33	1362.17	936.08	749.42	1248.08	2010.92	1382.33	980.75	1176.58	860.92	974.75	1089.92	179.667	60.4857			302	1129.17	954.75	1003.17	818.42	1075.58	1086.58	857	846.54	913.92	965.014	153.934	22.9052			302	729.17	945.58	1277.17
	303	919.5	1525.58	1012.25	1272.33	1204.75	1077.75	748	803.5	1317.33	974.17	784.67	798.58	1177.67	869.08	1356.83	971.58	734.58	1234.67	2006.5	1368.33	977.17	1185.83	850.92	976.25	1089.49	179.243	60.3429			303	1120.83	971.25	994.75	837.92	1056.17	1081.17	836.67	849.71	930.92	964.377	153.297	22.8103			303	732.67	941.75	1275.42
	304	909.58	1502.83	1011.5	1280.75	1211.33	1106.42	751.25	809.17	1319.75	976.17	776.17	802.5	1186.75	883.08	1355.5	951.75	734	1235.17	2002.67	1365	1032.42	1162.08	842.33	984.92	1091.38	181.129	60.9779			304	1133	949.5	997.92	816.17	1076.08	1081.33	840	836.54	899.83	958.93	147.85	21.9999			304	744.92	944.92	1279.75
	305	925.5	1513.42	1017.17	1263.17	1201.75	1081.67	747.17	820.08	1313.67	975.83	789	816.83	1164.58	884.25	1350.67	964.67	741.42	1226.75	2028.92	1354.75	1022.58	1166.75	849.58	983.17	1091.81	181.556	61.1218			305	1135.17	956.5	1008	821.25	1072.5	1070.58	836.08	845.67	908.17	961.547	150.467	22.3892			305	729.42	937.08	1281.08
	306	923.75	1518.17	1011.92	1304.08	1205.92	1099.08	743.58	822.42	1354.5	965.33	780.75	809	1166.58	902.25	1354.5	957.17	745.83	1215.25	1999.25	1373.17	1036.92	1170.08	852.75	977.08	1095.39	185.139	62.3279			306	1118.83	967.58	1002.75	820.17	1075.33	1096.08	841.25	836.17	903.83	962.443	151.363	22.5226			306	727.17	947.33	1272.25
	307	944	1506.92	1025.33	1267.42	1219.08	1083.58	739.92	815	1351.25	979.42	790.17	835.92	1164.67	915.25	1350.83	1294.83	747.25	1210.92	2011	1365.08	1059.33	1183.33	861.67	980.75	1112.62	202.372	68.1294			307	1130.67	980.92	1002.08	822	1080.67	1099	829.83	838.63	1030.38	979.353	168.273	25.0388			307	728.83	936.92	1263.5
	308	928.25	1501.42	1022.67	1295.83	1240.92	1100	748.83	823.92	1362.17	980.33	784.42	810.67	1166.42	923.58	1357.08	965.17	749.17	1223.42	2014.75	1357.17	1079.75	1148.83	856.42	962.17	1100.14	189.89	63.9274			308	1143.83	978	1000.92	827.5	1084.83	1079.25	846.58	832.67	1041.29	981.652	170.572	25.3809			308	733.5	944.92	1287.75
	309	934.08	1502.08	1002.75	1272.83	1205.33	1085.08	754.83	829.17	1363.17	968.42	775.75	811.58	1162.42	930.92	1348.5	976	758.75	1240.42	1999.67	1355.33	1087	1175	857.25	964.33	1098.36	188.111	63.3285			309	1144	977	977.33	826.33	1099.92	1075.17	854.5	828.33	1053.54	981.791	170.711	25.4015			309	739.08	948.08	1266.33
	310	941.5	1515.17	1015.08	1311.67	1215.58	1093.25	753.5	834.83	1372.17	978	781.5	801.5	1148.08	937.25	1349.58	957.83	741.33	1209.5	1987.5	1346.42	1117.33	1162.83	880.83	975.58	1101.16	190.909	64.2704			310	1122.67	966.5	991.92	824.08	1076.83	1088.92	845.67	840.25	1070.29	980.792	169.712	25.2529			310	730.5	949.08	1276.75
	311	936.17	1528	1028.67	1291.5	1221.33	1103.33	762.08	828.25	1393	983.5	776.67	810.75	1160.42	965.17	1335.75	967.5	746.17	1195.75	1986.5	1353.67	1119.58	1165.83	860.83	979	1104.14	193.893	65.2749			311	1136.92	985.58	1001.42	809	1090.25	1087.5	848.42	837.83	1077.13	986.006	174.926	26.0287			311	721.67	931	1261
	312	947	1508.5	1033.33	1321.42	1213.83	1098.17	743	825.67	1411.42	982.33	775.67	813.75	1143.25	987.17	1358.42	965.83	754.33	1204.5	1990.58	1340.58	1190.17	1183.42	854.25	965.83	1108.85	198.601	66.86			312	1140.25	983.42	1002.25	824.25	1094.25	1079.92	840.25	822.58	1018.29	978.384	167.304	24.8946			312	731.92	938.83	1273
	313	943.92	1493.58	1020.92	1288.83	1231.08	1098.58	739.08	853.25	1424.25	980.33	775.33	799.42	1155.75	1000	1345.75	958.42	746.92	1193.42	1989.08	1340.42	1161	1187.5	869.75	975.92	1107.19	196.937	66.3			313	1129.58	990.08	1007.25	808	1066.42	1083.67	831.08	828.46	1022.17	974.079	162.999	24.254			313	734.5	953.83	1279.42
	314	942	1498.75	1025.33	1313.92	1225.42	1087.67	747.25	853	1394	980.5	791.83	808.17	1143.67	1004.25	1342.42	970.17	746.08	1192.58	1988.5	1323.83	1166	1183	876.25	958.83	1106.81	196.559	66.1726			314	1147.83	978.92	999.83	824.92	1092	1097	842.83	932.33	1034.42	994.453	183.373	27.2857			314	731.67	940.75	1256.83
	315	959.5	1490.58	1033.17	1278.92	1233.5	1110.5	742.33	867.58	1431	979.5	774.5	808.08	1132.67	1045.42	1339.83	973.67	735.5	1200.67	2001.25	1338.92	1195.5	1190.58	876.5	963.67	1112.64	202.389	68.1353			315	1135.17	992.5	995.17	821.5	1091.67	1098	835.58	917	1039.71	991.811	180.731	26.8925			315	738.08	942.83	1245.92
	316	949.83	1501.08	1036.08	1331.17	1224.25	1113	748.58	867.83	1453.92	980	792.08	803.33	1150.58	1056.67	1338.83	961.67	740.58	1180.25	1992.5	1330	1201	1193.42	874.17	950.75	1115.48	205.232	69.0924			316	1144.5	982.67	1010.42	816.25	1095.92	1087.75	827.42	895.25	1028.08	987.584	176.504	26.2636			316	747.67	945.5	1250.75
	317	976.17	1487.75	1030.33	1285	1220.83	1117	740.83	874.5	1453.58	989.58	779.33	801	1138.25	1091.5	1332.75	977	738.75	1195.58	1982.17	1318.75	1211.58	1191.75	870.83	959.58	1115.18	204.933	68.9917			317	1140.5	989.92	997.83	825.33	1104.25	1091.17	833.08	917.58	1043.54	993.689	182.609	27.1719			317	729.25	942.08	1242.33
	318	966	1496	1040	1326	1237.58	1098.75	737.17	897.08	1473.33	989.58	786.58	808.58	1137.08	1112.5	1329.25	950.58	732.75	1191.5	1976.08	1331.42	1228.58	1193.33	882.17	941.58	1119.31	209.061	70.3815			318	1146.5	994.75	1009	813.17	1083.92	1100.58	829.92	908.75	1036.54	991.459	180.379	26.8401			318	745.75	947.58	1249
	319	973.75	1488.08	1037.67	1308.42	1227.25	1092.5	732.83	891.25	1462.5	992.42	789.25	798.58	1140	1135.42	1335	954.58	739.17	1169.33	1977.83	1314.17	1234.67	1186.08	883.83	949.08	1117.24	206.986	69.6828			319	1129.58	1000.17	995.58	820.17	1097.92	1101.83	829	900.42	1044.38	991.006	179.926	26.7726			319	729	946.75	1253.17
	320	969.25	1484	1033.67	1332.75	1233.42	1118.42	746.92	891.67	1486.17	997.92	783.83	819.5	1133.83	1164.92	1326.17	955.75	728.33	1168.58	1972.42	1329.92	1262.08	1187.58	879	947	1123.05	212.796	71.6388			320	1125.92	983.33	986.75	820.33	1098	1101.33	1105.5	900.75	1036.25	1017.57	206.493	30.7259			320	734.17	942.83	1228
	321	977.83	1474.08	1038.42	1305.25	1226.83	1106.17	750.5	906.75	1522.58	999.92	784.75	798.33	1125.5	1195.42	1333.17	946.33	735.58	1166.92	1968.83	1314.83	1264.08	1192.25	884.33	942	1123.36	213.11	71.7447			321	1111.67	987.58	1000.92	824.58	1083.42	1101.83	1098.33	894.67	1051.46	1017.16	206.082	30.6647			321	730.92	942.33	1228.17
	322	993.83	1480.75	1052.17	1346.92	1242.67	1119.58	729.92	890.83	1550.58	989.92	783.33	785.75	1118.25	1235.33	1306.75	941	744.42	1155.17	1934.33	1308.25	1300.83	1182	898.58	951.08	1126.76	216.51	72.8892			322	1112.67	992.25	999.75	828.42	1098	1109.42	1083.92	885.67	1046.63	1017.41	206.334	30.7022			322	729	931.25	1253.17
	323	993.83	1493.75	1036.75	1298.08	1235.58	1111.17	725.75	901	1547.42	1003.5	794.17	802.75	1122.33	1302.67	1320.08	938.33	732.83	1159.67	1965	1313.5	1256.58	1191	874.58	938.67	1127.46	217.208	73.1241			323	1124.42	997.5	991.33	832.08	1096.42	1104.83	1091.92	901.33	1052.33	1021.35	210.271	31.288			323	735.58	939.67	1242
	324	1013.92	1501.75	1048.5	1337.42	1229.17	1103.08	743.33	951.42	1582.08	996.42	774.58	812.08	1117.25	1333.58	1311.08	936.92	724.5	1156.33	1943.75	1304.42	1265.83	1171.08	889.58	929.08	1132.38	222.131	74.7816			324	1126.08	988.58	1007.25	839.17	1099.17	1105.92	1094.67	892.67	1066.83	1024.48	213.402	31.7539			324	744.67	947.17	1235.75
	325	1018.42	1480.75	1050	1324.75	1238.08	1108.75	737.33	901.5	1583.83	1230	776.58	807.17	1111.83	1403.08	1308.17	943.17	726.5	1152.5	1931.58	1298.08	1281.67	1181.25	873.42	937.17	1141.9	231.649	77.9858			325	1136.75	997.58	1001.92	812.58	1101.67	1128.25	1083.67	905.42	1057.88	1025.08	214	31.8429			325	750.83	947.33	1243
	326	1021.33	1476.83	1046.25	1338.83	1232	1121.83	730.25	924.33	1620.25	1005.92	804.33	794.83	1120.25	1450.58	1313.92	933	719.25	1155.25	1930.25	1297.83	1278.08	1199.25	888.5	934.08	1139.05	228.801	77.0269			326	1128.83	1006.5	1000.83	835.25	1107.67	1112.83	1071.17	896.83	1061.83	1024.64	213.558	31.7771			326	737.33	965.25	1239
	327	1041.25	1488	1041.17	1337.33	1235.92	1117.5	728.92	915.08	1628.42	1001.5	774.92	801.08	1106.75	1470	1310.58	927.5	735.83	1151.92	1928.75	1308	1292.25	1192.67	887.33	925.58	1139.51	229.26	77.1817			327	1140.67	1007.08	1001.58	829.5	1108.83	1112.42	1076.83	907.5	1062.63	1027.45	216.369	32.1954			327	736.25	948.33	1230
	328	1051.75	1472.58	1042.33	1350.5	1227.33	1122.17	733.42	926.92	1630.17	989.17	774.25	806.33	1107	1538.17	1299.42	933.08	740.42	1154.67	1930.25	1295.08	1291.08	1180.83	893.83	929.42	1142.51	232.257	78.1905			328	1142.42	1006.83	1010.75	836.75	1113.17	1109.92	1077.67	888.08	1053.46	1026.56	215.481	32.0633			328	743.83	948.33	1235.25
	329	1071.08	1480.33	1052.67	1326.42	1246.67	1122.25	733.92	918.67	1673	988.25	783.67	841.08	1103.92	1588.17	1308.33	940.83	743.17	1140.08	1914.5	1297.5	1305.25	1196.75	884.83	927.33	1149.53	239.278	80.5541			329	1144.83	1008.75	999.5	831.17	1096.08	1112.75	1069.08	887.58	1068.54	1024.25	213.173	31.7199			329	736.67	959.5	1224.17
	330	1078	1479.5	1043.58	1340.08	1260.42	1118.42	739.58	927.33	1669.75	997.58	782.58	791.75	1101.25	1613.58	1310.75	921.17	738.25	1139.67	1924.5	1299.08	1298.75	1193.83	886.5	910.67	1148.61	238.357	80.2441			330	1144.42	1018.33	997.17	837.58	1111.75	1119	1075.58	897.17	1067.38	1029.82	218.74	32.5482			330	734.08	898	1222.25
	331	1078.33	1470.83	1049.58	1315.08	1267.83	1120.08	727.17	937.08	1677.67	997.08	791.25	798.5	1099.92	1653.75	1291	931.17	748.5	1132.58	1892.5	1314.17	1286.58	1196.33	909.42	918.25	1150.19	239.944	80.7783			331	1156.5	1015.58	995.08	850.58	1104.5	1125.5	1078.42	885.17	1068.08	1031.05	219.966	32.7305			331	738.67	910.67	1220
	332	1106	1464.58	1062	1349.33	1259.42	1136.92	750.33	964.67	1676.08	1004.58	780.25	807.75	1101.25	1671.92	1287.33	925.33	738.08	1144.33	1916.42	1308.5	1300	1193.42	895.42	908.83	1156.36	246.114	82.8556			332	1148.67	1018.25	993	846.58	1102	1127.5	1067.67	896.08	1060.54	1028.92	217.841	32.4144			332	750	920.17	1223.08
	333	1119.25	1470.42	1050.5	1333.08	1276	1142.5	738.92	970.17	1702	998.42	774.08	822.58	1109.83	1711.25	1284.75	921.42	738.67	1140.92	1892.08	1298.33	1313.92	1201.75	892.83	919.33	1159.29	249.042	83.8411			333	1160.67	1021.92	987.08	852.92	1100.58	1139.5	1083.83	908.25	1073.21	1036.44	225.36	33.5332			333	749.17	924.67	1227.75
	334	1124.58	1456.33	1049.08	1333.75	1273.42	1145.17	742.92	968.42	1714.42	1003.42	809.92	803.75	1096.42	1699.42	1279.25	914.58	745.25	1144	1882.83	1284	1308.58	1200.42	897.33	903.25	1157.52	247.271	83.2451			334	1169.92	1018.33	989.33	852.83	1112.25	1108.67	1100.17	898.08	1072.79	1035.82	224.739	33.4408			334	751.33	932.33	1227.92
	335	1143.25	1462.58	1052.58	1326.58	1278	1157.08	736	981	1713	1004.92	782.42	819.75	1099.58	1748.42	1270.5	908.83	734.5	1138.75	1893.17	1294.58	1327.5	1211.58	893.67	900.5	1161.61	251.364	84.623			335	1188.08	1024.5	997.25	855	1096.92	1135	1059	898.42	1073.33	1036.39	225.309	33.5256			335	739.17	941.75	1224.58
	336	1170.5	1450	1063.75	1326.25	1292.75	1140.75	738.17	997.08	1723.33	968	763.67	804.42	1086.92	1741.92	1276.5	925	742.58	1123.42	1897.25	1284.25	1297.67	1196.33	906.67	915.92	1159.71	249.462	83.9828			336	1189.42	1021.75	985.83	868.58	1117.83	1153.33	1070.58	897.92	1077.96	1042.58	231.498	34.4465			336	734.5	933	1200.08
	337	1158.17	1472.92	1053.67	1324.75	1295.67	1146.33	744.83	1006.08	1728.67	970.67	766.08	812.75	1091	1750.42	1251.33	913.83	737.33	1146.25	1877.25	1285.25	1322.83	1215.92	904.75	923.42	1162.51	252.257	84.9236			337	1188	1013.08	973.08	874.25	1111.92	1147.33	1070.67	899.5	1080.54	1039.82	228.739	34.036			337	746.75	938.75	1218.92
	338	1170.92	1448.17	1058.33	1326.42	1292.17	1153.33	746.75	1021.67	1737.33	981.42	767.33	815.08	1071.75	1762.92	1274.25	892.33	741.92	1119.17	1900.08	1281.08	1298.42	1198.58	918.25	912.58	1162.09	251.844	84.7845			338	1208.58	1023.08	980	859	1114.25	1139.92	1083.17	901.92	1073.92	1042.65	231.569	34.4571			338	728.17	944.92	1207.83
	339	1169.25	1456.83	1047.42	1315.42	1298.92	1161.5	744.83	1033.5	1762.67	971.92	758	807.25	1075.33	1761.83	1281.42	919.58	744.58	1121.67	1865	1286	1320.17	1197.67	899.42	915.58	1163.16	252.907	85.1423			339	1220.58	1032	992.17	867.58	1129.92	1138	1069.5	903.75	1077.29	1047.87	236.786	35.2333			339	739.17	945.42	1212.5
	340	1174.5	1452.17	1049.83	1338.83	1294.17	1149	741	1049.33	1810	976.75	758.08	810.75	1080.67	1780.67	1265.58	915.17	746	1139.08	1866.5	1270.67	1308.75	1198.58	907.5	897.33	1165.87	255.621	86.0562			340	1217.92	1009.33	991.92	876.92	1139.42	1144.5	1067.17	898.58	1078.38	1047.13	236.047	35.1234			340	739.67	948.5	1204.17
	341	1184.5	1429.67	1058.92	1315.33	1295.17	1133.75	735.42	1049.33	1852.92	981.92	763.08	815.33	1077.67	1762.92	1271.5	908.75	764.67	1122	1851.92	1268.25	1309.5	1233.67	901	907.17	1166.43	256.182	86.2448			341	1225.75	1021.83	993.5	872.42	1126.92	1141.83	1060.33	887.75	1089.5	1046.65	235.568	35.0521			341	750.5	946.17	1216
	342	1186.5	1433.42	1060.25	1330	1286.25	1139	739.25	1057	1828.75	993.17	762.25	811.42	1077.17	1769.83	1272.5	899.08	758	1105.92	1855.58	1253.08	1306.17	1203.25	908.42	902.25	1164.1	253.855	85.4614			342	1231.25	1034.92	993.75	873.67	1110.25	1158.58	1060.5	885	1083.71	1047.96	236.879	35.2472			342	758.42	955.92	1218.58
	343	1202	1416	1052.58	1328.42	1302.67	1132.25	749.83	1080.42	1837.17	986.42	757.42	806.25	1070.17	1780.92	1285.42	894	767.83	1110.17	1848.92	1250.08	1306.83	1214.5	904.5	888.33	1165.55	255.296	85.9466			343	1238.67	1035.17	973	880.25	1141.83	1154.33	1075.83	888.5	1080.33	1051.99	240.91	35.847			343	745.83	963.58	1211.42
	344	1204.33	1427.08	1044.83	1335.17	1295.33	1150.08	732.17	1078.83	1844.08	1002.08	762.92	810.33	1081.92	1763.83	1267.42	889.42	755.92	1113.08	1834.42	1268.33	1296.67	1227.67	902.17	964.33	1168.85	258.6	87.0591			344	1233.58	1039.33	983.67	881	1143.17	1162.75	1084.08	898.92	1082.25	1056.53	245.448	36.5222			344	751.08	998.42	1200.5
	345	1205.92	1426.25	1055.5	1339.42	1302.08	1145	748.33	1100.33	1878.58	987.33	771.67	810.58	1070.83	1772.17	1248.42	903	739.42	1119	1845.33	1253.08	1313.17	1224	902.83	981.58	1172.66	262.409	88.3414			345	1265.83	1023.25	994.33	881.5	1142	1166.42	1083.42	881.92	1100.25	1059.88	248.8	37.0211			345	742.33	992.83	1204.08
	346	1200.75	1435.58	1056.33	1349	1295	1136.42	730.83	1111.5	1870.17	978.33	770.25	832.92	1068.67	1779.58	1251.67	885.5	747.17	1101.25	1822.17	1255.83	1288.17	1210.25	905.25	972.33	1168.95	258.705	87.0943			346	1257.17	1023.42	996.67	867.33	1132.25	1172	1093.08	896.33	1095.5	1059.31	248.226	36.9356			346	738.08	1011.75	1213.83
	347	1212.42	1423.75	1056.83	1341.58	1305.42	1140.75	727.75	1123	1888.83	994.08	763.08	807.58	1074.17	1781.58	1254	894.5	740.75	1103.5	1846.42	1261.92	1298.5	1222.5	920.17	910.42	1170.56	260.312	87.6355			347	1261.17	1030.17	989.58	877.33	1160.5	1173.67	1102.17	900.25	1094.13	1065.44	254.361	37.8485			347	749.5	1008.58	1199.42
	348	1199.17	1424.5	1060.42	1339.25	1304.17	1163.92	740	1141.25	1924.17	985.42	762.25	811	1057.25	1792.25	1264.92	880.33	738.92	1103.67	1816.17	1268.5	1265.75	1220.25	922.58	904.67	1170.45	260.199	87.5973			348	1260.83	1035.33	993.5	875	1161.25	1167.25	1093.75	905.75	1094.92	1065.29	254.207	37.8256			348	733.25	1021.17	1181.75
	349	1212.67	1408.75	1061.92	1339.17	1308.08	1162.42	731.33	1148.75	1876.42	1002.58	752.75	811.25	1053.25	1817.25	1249.17	888.67	733.08	1093.67	1823.5	1255.17	1267.58	1241.5	913.58	873.92	1167.77	257.518	86.6947			349	1280.17	1046.17	988.17	870.5	1167.25	1189.67	1126	899.25	1111.08	1075.36	264.282	39.3248			349	748.67	1045.92	1190.67
	350	1235.08	1439.25	1054	1318.83	1301.33	1155	728.25	1171.42	1893.42	989.5	759.75	806.5	1067.58	1789.75	1244.08	890.92	731	1100.5	1819.25	1244.08	1283.58	1218.67	920.75	882.08	1168.52	258.274	86.9491			350	1289.67	1033.42	999.67	877.25	1167.17	1202.08	1128.67	898.75	1097.25	1077.1	266.023	39.5839			350	743.92	1045.17	1176.92
	351	1255.17	1410.25	1053.17	1340.25	1303.17	1165.33	733.42	1181.5	1917.92	993.5	765.17	814.25	1054.67	1801.5	1251.5	891.83	741.33	1109.08	1838.67	1237	1267.08	1233.75	940.25	858.5	1173.26	263.011	88.5439			351	1268.58	1047.17	1008.67	870.92	1181.67	1188.75	1111.83	905.92	1098.21	1075.75	264.667	39.382			351	747.58	1037.5	1186.67
	352	1240.5	1405.83	1051.17	1325.92	1307.83	1177.83	732.5	1176.92	1903.33	991.17	771.17	797.67	1057.25	1819.75	1246.83	873.92	744.25	1095.75	1808.83	1254.25	1275.58	1227	929.25	850.42	1169.37	259.122	87.2346			352	1285.92	1056.42	1013.08	876.17	1171.83	1189.33	1116.75	922.42	1100.79	1081.41	270.332	40.225			352	755.5	1046.67	1191.25
	353	1255.75	1401.5	1058.67	1330.67	1318.5	1175.33	742.83	1203.17	1941.17	1002.58	765.08	795.08	1052.25	1788.92	1235	883.5	740.92	1088.08	1791.5	1239.25	1250.67	1204.67	931.33	842.33	1168.28	258.031	86.8675			353	1273.92	1043.17	987.42	858.5	1168.75	1186	1097.08	928.08	1100.08	1071.44	260.364	38.7418			353	759.25	1040.75	1197.33
	354	1241	1398.5	1046.75	1319.83	1301.08	1186.25	736.25	1192.58	1953.17	1010.17	776.5	812.58	1048.42	1817.58	1204.92	886	769.33	1085.25	1790.33	1240.5	1273.67	1226.17	930	844.25	1170.46	260.212	87.6016			354	1294.75	1043.25	1007.5	869.92	1161	1193.67	1126.08	911.25	1099.46	1078.54	267.462	39.798			354	755.33	1049.17	1177.08
	355	1241.67	1390.92	1055.17	1350.75	1310.83	1170.33	737.5	1176.67	1973.83	1004	771	812	1042.92	1796.08	1199.42	889.17	770.58	1102.58	1658.92	1245.33	1259.25	1227.75	933.25	847.83	1165.32	255.073	85.8716			355	1296.5	1049.5	999	858.08	1173.33	1198	1112	915.17	1101.75	1078.15	267.068	39.7393			355	737.67	1056.67	1183.58
	356	1247.17	1389.33	1069.67	1321.83	1310.08	1169.75	738.5	1172.83	1998.5	1003.42	770.25	807.75	1042.17	1798.92	1193.17	878.25	762.75	1083.17	1567	1255.67	1274.58	1221.92	933.42	838.83	1160.37	250.122	84.2048			356	1288.67	1049.08	1024.08	862.25	1166.08	1188.58	1119.33	895.42	1094.08	1076.4	265.317	39.4787			356	754.08	1047.83	1175.5
	357	1248.5	1401.17	1065.67	1356.92	1304.92	1173.75	736.58	1185.25	1996.08	1005.33	767.58	814.42	1060.42	1795.42	1179.17	888.92	772.58	1090.58	1901.67	1247.58	1265.67	1183.58	956.67	842	1176.68	266.435	89.6965			357	1309.67	1051.83	1016.25	860	1179.83	1177.83	1113.58	904.08	1099.54	1079.18	268.099	39.8927			357	748.83	1064	1184.42
	358	1274.92	1375	1047.5	1337	1322.17	1167.58	742.08	1206.42	2019.42	1018.42	767.25	799.83	1050.67	1811.67	1181.25	881.75	765	1069.92	1910.25	1226	1263.83	1252.75	929.92	828.67	1177.05	266.803	89.8205			358	1305.83	1053.08	1009.33	851.08	1174.5	1209	1148.75	897.83	1115.88	1085.03	273.951	40.7635			358	741.58	1060.83	1189.42
	359	1254.92	1415.42	1051	1365.17	1328	1172.33	744.67	1189.83	2048.83	1008.5	770.25	722.5	1043.92	1809.75	1195.75	868.25	773.75	1080.83	1932.67	1240.75	1271.5	1272.67	941.83	826	1180.38	270.129	90.9402			359	1307.58	1070.42	1016.75	846.75	1191	1482.17	1120.33	908.67	1094.5	1115.35	304.272	45.2752			359	758.58	1072.67	1184.42
	360	1244.25	1396.92	1082	1356.17	1305.83	1181.5	726.92	1214.67	2067.75	1010.92	817.25	716.08	1042.25	1799.17	1200.42	878.08	776.58	1072.5	1921.83	1231.67	1279.5	1287.42	942.5	824.5	1182.36	272.112	91.6078			360	1304.83	1050.67	1024	851.92	1181.67	1457.17	1109.25	910.33	1090.29	1108.9	297.823	44.3157			360	739.83	1077.42	1189.5
	361	1248.75	1388.42	1048.17	1363.08	1305.92	1195.08	740.42	1211.25	2078	1013.33	802.25	723.83	1025.33	1808.83	1182.08	886.58	770.92	1093.17	1909.92	1243.5	1279.17	1294.92	941.42	834.5	1182.87	272.618	91.7783			361	1300.17	1058.75	1015.92	862.92	1196.75	1492.08	1120.08	905.75	1089.83	1115.81	304.726	45.3427			361	754.92	1066.75	1180.33
	362	1245.92	1380.67	1058.42	1325.92	1320.58	1191.58	728.17	1206.17	2110.42	1004.58	810	734.33	1040.83	1805.17	1173.92	887.92	781.17	1077.92	1948.25	1230.42	1274.17	1279.83	942.58	831.67	1182.94	272.692	91.8032			362	1326.17	1054.83	1023.33	844.67	1209.75	1501.58	1127.83	909.92	1081.58	1119.96	308.882	45.9612			362	755.08	1078.25	1181.42
	363	1236.42	1382.67	1071	1365.75	1307.5	1200.17	737.58	1217.67	2143.92	999	796.58	722	1043.17	1800.42	1193.75	883.33	767.08	1061.42	1952.5	1231.58	1276.83	1268.17	937.25	838.33	1184.75	274.504	92.4131			363	1308.58	1066.5	1040.5	845	1204.5	1483.25	1123.33	902.5	1074.92	1116.56	305.484	45.4556			363	749.58	1083.33	1169.33
	364	1269.75	1395.42	1081.25	1354.25	1330.58	1177.67	728	1215.17	2111	1020.75	793.58	729.67	1045.75	1811.67	1185.42	891.17	767.25	1066.42	1793.67	1234.83	1297.5	1271.58	940.25	840.25	1181.37	271.119	91.2735			364	1316.58	1061.92	1040.17	847.67	1221.83	1499.17	1155.33	951.58	1080	1130.47	319.392	47.5251			364	761.67	1070.42	1175.83
	365	1258.67	1383.42	1068.75	1368.92	1344.08	1197.42	736.5	1230.33	2174.58	1024.08	804	722.83	1038.92	1790.67	1170.58	881.42	771.75	1062.5	1943.75	1243.92	1271.08	1267.83	924.42	824.08	1187.69	277.438	93.4007			365	1324.83	1069.75	1046.75	839.75	1220.33	1498.92	1133.67	966.83	1083.38	1131.58	320.499	47.6897			365	774	1080.17	1168.58
	366	1271.17	1380.33	1068.25	1332.17	1329.42	1195.83	729.58	1229.33	2147.75	1034.67	800.25	725.17	1026.83	1785.67	1163.33	881	758.25	1069.92	1948.67	1225.33	1271.67	1285.67	947.25	820	1184.48	274.23	92.3208			366	1340.42	1065.42	1033.83	848.75	1233.58	1500.08	1147.58	961.17	1085.5	1135.15	324.068	48.2208			366	758.17	1094.25	1151.25
	367	1259.92	1365.92	1063.33	1364	1353.08	1216.42	735.17	1229.83	2170.67	1031.75	800.92	726.33	1035.33	1785.42	1168.17	876.75	764.42	1057.67	1953.83	1237.33	1276.42	1262.08	950.83	809.25	1187.29	277.035	93.2652			367	1349.08	1071.58	1042.58	842.67	1241.42	1492.58	1145.75	972.42	1075.75	1137.09	326.012	48.5101			367	758.58	1100.67	1167.83
	368	1255.75	1394.25	1070.83	1342.75	1322.67	1208.42	737.67	1246.83	2181.75	1029	798.58	737.92	1032	1804.42	1172.75	881.17	773.5	1047.75	1921.92	1209.83	1297	1279.58	934.25	814.17	1187.28	277.032	93.2641			368	1340.5	1072.17	1045.25	855.33	1234.33	1491.58	1151.83	973.75	1082.96	1138.63	327.553	48.7394			368	750.58	1088.67	1194.5
	369	1265.08	1379.25	1086.17	1383.75	1338.83	1200	724.33	1261.92	2195	1034.67	801.33	740.08	1030.17	1777.42	1165.67	885.33	762.83	1032.08	1950.83	1209	1290.75	1281.58	948.83	803.92	1189.53	279.284	94.0224			369	1350.42	1060.67	1048.67	839	1243.5	1514.25	1175.33	982.83	1084.29	1144.33	333.249	49.5869			369	756.5	1105.58	1159
	370	1270.33	1380.83	1085.08	1368	1344.83	1201.25	743	1256.92	2202.08	1051.5	793.17	739.08	1022.42	1780.17	1166.67	874.25	777.42	1037.42	1931.5	1234.42	1292	1285.08	940.17	818.42	1191.5	281.25	94.6844			370	1352.42	1077.33	1060.17	825.42	1240.83	1491.75	1147.83	994.58	1077	1140.81	329.734	49.064			370	764.33	1093.92	1159.08
	371	1262.33	1365.83	1088	1388.67	1362.5	1213.33	724.83	1262.67	2215	1030.67	798.83	874.67	1033.75	1789.08	1161.33	885.75	771.5	1030.92	1938	1209.58	1297.25	1276.5	939.92	817.33	1197.43	287.177	96.6795			371	1351.67	1073.75	1059.17	850.42	1224.67	1471.25	1189.67	987.75	1064.92	1141.47	330.394	49.1622			371	776.08	1094	1178.83
	372	1270.42	1384.17	1074	1407.58	1358.58	1199.67	733.67	1267.08	2158.83	1044.5	799.08	716.33	1025.58	1775.42	1148.75	875.83	769.33	1037.67	1934.42	1213.67	1285.25	1278	950.25	814.33	1188.43	278.184	93.6519			372	1360.25	1047.33	1053.83	837.58	1227.67	1485.17	1175	991.83	1068.29	1138.55	327.47	48.727			372	752	1094	1154.58
	373	1267.25	1368.67	1085.75	1436.58	1372.33	1212.17	728.33	1276	2195.67	1048.33	796.08	724.58	1022.08	1785.17	1166.42	874	765.75	1025.33	1927.5	1220.67	1302.83	1301.58	931.67	814.58	1193.72	283.472	95.4322			373	1373.92	1075.25	1052.33	841.75	1238.08	1463.58	1167	1001.83	1075.17	1143.21	332.132	49.4208			373	773.58	1091	1168
	374	1296.83	1380.33	1087.17	1431.75	1357.83	1174.08	735	1272.25	2194.75	1038.92	790.5	725.67	1020	1786.92	1176.67	868	763.67	1027.25	1927.17	1196.92	1299.58	1303.92	952.83	813.58	1192.57	282.316	95.0432			374	1382.25	1065.08	1075.75	836.42	1251.75	1479.75	1186.17	1011.17	1074.42	1151.42	340.338	50.6417			374	769.5	1106.25	1148.75
	375	1288.58	1369.58	1090.83	1445.25	1388.33	1169.5	733.75	1276.83	2199.17	1029.58	791.08	718.17	1016.33	1784.75	1153.08	893.58	771.42	1022.92	1909.25	1206.33	1321.92	1290.33	948.25	802.58	1192.56	282.308	95.0404			375	1364.83	1059.67	1063.67	828.58	1237.75	1455.08	1195.58	989.33	1072.17	1140.74	329.66	49.0529			375	793.58	1086.08	1151.17
	376	1297.58	1379.33	1091.08	1442.42	1379.75	1165.58	734.42	1264.58	2197.83	1048.33	809.08	722.25	1005.25	1753.17	1179.42	892	773.5	1027	1917.17	1199.83	1288.08	1305.17	943.25	809.75	1192.74	282.493	95.1025			376	1383.83	1089.67	1064	833.5	1246.25	1463	1189.67	1007.92	1077.33	1150.57	339.494	50.5162			376	781.08	1095.75	1165.33
	377	1297.67	1377.08	1086.83	1438.58	1386.33	1151.42	735.67	1270.5	2209.83	1061	794.25	728.75	1012.25	1780.58	1191.5	877.58	751.17	1027.92	1931.58	1202.08	1285.92	1296.83	933.58	814.08	1193.46	283.208	95.3432			377	1391.83	1058.42	1058.42	816.83	1252.08	1449.33	1324	1001.33	1062.92	1157.24	346.16	51.5081			377	772.92	1106.83	1160.33
	378	1323.83	1354.42	1092.42	1428.83	1381	1161.92	738.83	1272.75	2198.92	1052.42	827.25	722.75	1006.67	1776.08	1214.33	879.5	758.58	1025.67	1908.25	1205.17	1282.33	1306.25	949.25	793.33	1194.2	283.948	95.5925			378	1387.67	1061.17	1072.92	820.92	1266.83	1462.08	1352.08	1013.42	1060.83	1166.44	355.356	52.8764			378	781.42	1116.67	1154.33
	379	1349.5	1365.83	1081.83	1455.83	1393	1178.83	736.58	1257.17	2211.42	1052.5	795.08	723.08	1009.67	1775.42	1194.42	879.67	763.92	1024.58	1884.83	1195.67	1285	1301.42	947.75	802.33	1194.39	284.139	95.6567			379	1382.08	1053.83	1064.25	823.17	1255.25	1445.33	1372.58	1012.33	1062.92	1163.53	352.447	52.4435			379	789.42	1114.17	1150.17
	380	1344.08	1352	1085.58	1453	1395.25	1180.42	737.83	1271.83	2184.75	1051.42	798.08	713	1001.25	1769.17	1186.83	884.25	762.42	1005.25	1899.75	1198.83	1281.75	1306	938.17	804.67	1191.9	281.649	94.8186			380	1389	1059.67	1093.08	833.58	1251	1429	1360.42	1009.67	1057.75	1164.8	353.717	52.6325			380	777	1100.42	1155.83
	381	1363.83	1354.5	1093	1481	1420.08	1192.67	746.83	1271.92	2187.17	1059.67	799.92	703.92	993.5	1770.92	1190.92	882.67	765.75	1018.58	1924.42	1190.67	1281.67	1303.42	946.67	803.08	1197.78	287.532	96.7993			381	1396.67	1061.25	1064.58	816.5	1268.08	1447.5	1358.42	1008.17	1056.25	1164.16	353.078	52.5374			381	780.92	1109.5	1152.92
	382	1370.25	1361	1103.75	1468.08	1411.25	1180.58	746	1272.5	2171.67	1055	785.17	711.92	1016.42	1779.92	1215	880	764.42	1019.58	1890.33	1197.5	1270	1305.33	944.5	799.67	1196.66	286.41	96.4214			382	1381.42	1071.17	1073.83	832.17	1262.17	1418.67	1362.33	981.67	1065.25	1160.96	349.884	52.0623			382	789.58	1116.42	1140.75
	383	1401.67	1343.42	1095.67	1459.67	1420.5	1183.17	742.17	1288.5	2181.33	1079.92	797.17	720.83	1008	1772.58	1200.08	870.75	765.58	1007.08	1893	1194.67	1274	1289.42	947.67	809.92	1197.78	287.532	96.7991			383	1385.58	1070.5	1089.33	828.42	1256.42	1413.33	1377.33	991.42	1063.58	1163.99	352.91	52.5125			383	779.25	1118.58	1136.5
	384	1396	1345.08	1108.83	1481.17	1429.5	1194.17	744.33	1321	2234.25	1064.67	817.08	708.33	1006.83	1773.25	1202.83	872.42	774.5	1005	1875.08	1184.17	1274.83	1279.25	951.83	793.92	1201.6	291.347	98.0833			384	1392.58	1071.25	1075.67	830.25	1259.5	1426.83	1405	995.67	1065	1169.08	358.003	53.2703			384	779.5	1127.33	1143.08
	385	1407.75	1359.33	1124.92	1507.92	1437.75	1176.58	734	1267.33	2231.33	1056.58	801.5	699.33	993.5	1757	1183.42	882.67	767.75	1002.92	1881.92	1204.67	1278.08	1307.33	940.17	798.5	1200.09	289.844	97.5773			385	1386.75	1082	1085.08	824.5	1262.17	1417.25	1384.08	982.33	1055.92	1164.45	353.373	52.5814			385	789.25	1115	1147.42
	386	1408.17	1331.83	1106.08	1504	1444.25	1201.67	739.5	1273	2220.83	1053.67	810	693.33	996	1773.42	1192.25	879.33	767.42	995.83	1879.83	1174.17	1280.5	1300.33	942.08	794.33	1198.41	288.159	97.0102			386	1402.08	1067.25	1090.83	799.58	1261.83	1417.25	1401.75	993.67	1054.29	1165.39	354.312	52.7211			386	770.25	1119.17	1124.58
	387	1442.17	1354.08	1107	1517.58	1462.67	1197.67	742.5	1283.42	2216.08	1061.17	800.42	700.25	991.67	1748	1181.5	877.08	763.67	1007.33	1882.92	1187.17	1276.5	1314.58	945.75	791.33	1202.19	291.938	98.2824			387	1395.42	1073.58	1076.92	804.33	1260.75	1405.17	1417.58	984.42	1052.13	1163.37	352.287	52.4197			387	792.08	1124.17	1138.42
	388	1460.33	1346.17	1106	1512.17	1449.92	1214.25	791.33	1267.25	2239.17	1066.42	804.33	705.67	979.17	1772.33	1202.08	883.33	769	992.17	1867.67	1167.25	1263.58	1297	947	789.58	1203.88	293.632	98.8527			388	1385.33	1077.42	1064.92	812.67	1281.5	1426.08	1428.42	982.17	1050.38	1167.65	356.574	53.0577			388	785.42	1104.92	1133.83
	389	1461.25	1333.42	1112.58	1517.17	1462	1193.17	781.42	1274.08	2219.17	1056.33	813.67	691.92	998.17	1736.42	1178.75	870.42	758.42	990.08	1868.67	1184	1263.5	1311.42	950.33	786.08	1200.52	290.268	97.7203			389	1406.83	1083.75	1070	823.33	1257.42	1418.75	1439.33	981.25	1043.5	1169.35	358.271	53.3102			389	789.83	1122.67	1126.67
	390	1449.42	1347	1110.17	1518.25	1453.58	1212.83	822	1256.17	2199.92	1058.42	808.83	701.08	999.58	1754.33	1189.92	874	758.58	995.92	1853.17	1203.92	1260.5	1313	952.33	793.25	1203.59	293.34	98.7545			390	1383.5	1088.67	1085.5	811	1283.08	1425.83	1413.33	981.58	1051.33	1169.31	358.233	53.3046			390	784.17	1128.83	1136.33
	391	1448.17	1342	1105.42	1553.08	1461.75	1216.5	815.08	1259	2205.75	1065.83	806.83	691.08	993.67	1732.58	1185.25	862.25	761.67	999.42	1878.17	1212.92	1277	1313	959.92	789.92	1205.68	295.427	99.4571			391	1399.5	1091.08	1096.42	814.58	1266.67	1401.67	1410.5	995.25	1053.25	1169.88	358.8	53.3889			391	766.58	1154.33	1139
	392	1469.83	1317.83	1109	1523.83	1480.17	1221.33	822.5	1265.42	2205.58	1071.25	806.67	689.58	988.75	1736.75	1187.58	869.17	770	1000.33	1852.08	1228.92	1259.67	1319.67	949.75	796.58	1205.93	295.677	99.541			392	1402.33	1072.42	1098	801.83	1272.92	1411.5	1384.83	984.58	1050.13	1164.28	353.202	52.5559			392	787.5	1131.75	1572.92
	393	1459.75	1332.92	1137.42	1504.58	1466.83	1233	834.08	1244.25	2202.25	1062.75	806.08	683.58	1009.08	1750.92	1183	851.92	761.08	1000.08	1846.92	1207.67	1265	1311.17	939.67	778.42	1203.02	292.767	98.5616			393	1419.08	1096.67	1093.25	812.67	1283.33	1391.42	1357.92	979.92	1047.13	1164.6	353.519	52.6031			393	775.67	1131.92	1122.5
	394	1474.33	1351.25	1135	1529.5	1477.25	1220.25	834.5	1263.25	2208.17	1067.75	817.33	684.58	982.33	1725.92	1185.58	868.25	768.83	989.5	1839.83	1204.42	1270.67	1323.25	967.33	785.83	1207.29	297.038	99.9992			394	1415.75	1095.58	1093.25	816.67	1281.17	1393.75	1377.25	983.17	1065.75	1169.15	358.069	53.2801			394	784.17	1129.08	1127.08
	395	1466.25	1336.75	1121.08	1491.33	1496.42	1241.25	852.58	1251.58	2197.17	1085.5	817.08	692.92	992.5	1723.33	1181.83	793.75	761.75	979.33	1814.75	1185.58	1255.17	1317.92	962.42	780.58	1199.95	289.701	97.5292			395	1427.92	1077.58	1096.17	814.92	1293.67	1399.08	1356.5	998	1047.67	1167.95	356.866	53.101			395	800.58	1137.83	1125.67
	396	1479.92	1329	1130.33	1536.83	1467.67	1228.83	863.33	1241.25	2173	1070.58	809.83	687.67	996.08	1721.5	1184.92	823.5	770.75	979.17	1836.92	1233.42	1274.92	1339.33	937	788.08	1204.33	294.076	99.0022			396	1434.83	1094.67	1121.5	812.92	1292.42	1386.75	1358.67	980	1050.46	1170.25	359.167	53.4434			396	782.92	1133.92	1117.92
	397	1468.75	1335.5	1149.75	1494.33	1517.67	1256.42	806.33	1255.25	2173.33	1083.5	814.25	697.17	992.92	1753	1181.83	830.33	750.92	978.42	1832.42	1245.08	1250.17	1304.17	960	782.33	1204.74	294.493	99.1427			397	1420.83	1089.83	1102.83	818.58	1286.5	1386.42	1346.67	978.08	1056.75	1165.17	354.086	52.6874			397	808.83	1143.67	1103.58
	398	1464.92	1331.67	1139.33	1555	1493.58	1255.42	806.75	1238.92	2173.42	1081.08	812.33	702.58	1004.33	1706.58	1161.08	823.75	765.92	994.25	1840.83	1225.42	1248.17	1323.25	939.5	778.17	1202.76	292.51	98.4751			398	1422.67	1084.08	1116.75	814.67	1313.5	1395.67	1359.5	975.67	1040.04	1169.17	358.092	53.2836			398	776.42	1135	1114
	399	1463.75	1310	1152.08	1543	1531.25	1228.58	805.83	1231.67	2190.33	1088.25	814	698	993.5	1713	1181.5	822.25	763.42	971.5	1818.58	1236	1169.75	1309.33	946.25	775.42	1198.22	287.968	96.946			399	1432.5	1081.67	1429	813.5	1283.83	1372.25	1350.83	981.33	1055.75	1200.07	388.993	57.8816			399	790.75	1144.75	1111
	400	1458.75	1323.08	1162.83	1583.25	1499.58	1243.92	798.08	1243.67	2135.83	1109.25	802.25	705	1000.25	1729.17	1172.92	824.67	756	986.08	1802.67	1226.75	1273.92	1328.92	951.75	771.5	1203.75	293.504	98.8095			400	1421.17	1083.58	1424.5	824.92	1286.42	1401	1302.92	986.25	1054.33	1198.34	387.263	57.6242			400	776.17	1157.92	1109
	401	1443.08	1308.33	1152.67	1517.92	1530.33	1226	809.17	1225.92	2142.17	1098.75	808	697.42	992.58	1710.33	1171.83	828.08	766.08	983.08	1826.67	1215.92	1271.92	1352.25	960.42	779.08	1200.75	290.5	97.7983			401	1425.17	1090.08	1443.33	812.42	1300.17	1379.67	1332.08	990.08	1064.54	1204.17	393.091	58.4913			401	778.5	1165.25	1105.67
	402	1465.25	1308.67	1164.83	1603.83	1524.75	1256.58	804.92	1231.25	2162.17	1096.25	807.25	698.08	991.92	1704.42	1164.08	830.17	758.92	995.08	1803.5	1216.25	1283.33	1336.58	957.33	790.33	1206.49	296.239	99.7304			402	1423.92	1082.75	1426.17	816.92	1292.17	1384	1309.5	999.83	1045.92	1197.91	386.829	57.5595			402	782.17	1143.83	1116.58
	403	1468.67	1315.75	1176.92	1544.08	1524	1272.17	806.75	1222.25	2142.67	1077.58	798.58	691.83	991.5	1714.83	1182	827.17	763.08	987.58	1818.58	1220.17	1276.58	1321.83	958.42	788.67	1203.82	293.569	98.8315			403	1421.58	1086.42	1441.75	821	1308.25	1378.67	1323.42	981.42	1052.63	1201.68	390.602	58.121			403	757.17	1153.25	1117.5
	404	1464.25	1317	1143.75	1615.67	1538.5	1275.17	808.33	1220.75	2154	1083.83	807.17	688.58	980.67	1707.25	1167.42	819.92	759.83	990.58	1815.25	1221.75	1288.33	1327	895.92	789.08	1203.33	293.083	98.668			404	1407.83	1095.75	1441.42	817.83	1309.42	1373.75	1304.5	987.58	1062.92	1200.11	389.031	57.8872			404	773	1153.33	1108
	405	1469	1296.08	1158.08	1587.5	1527.33	1253.83	809.67	1225.08	2135.25	1095.5	804.42	693.25	988.17	1693.33	1152.25	816.42	753.67	986.08	1794.17	1217.75	1282.08	1325.42	891.67	786.17	1197.59	287.34	96.7346			405	1423.83	1080	1428.75	817.75	1306.58	1364.83	1274.75	977.17	1056.29	1192.22	381.137	56.7125			405	779.33	1140.33	1115.25
	406	1449.67	1302.25	1186.83	1625.83	1535.08	1258.67	807.75	1219.42	2102.75	1109.25	808.58	689.67	962.67	1684.83	1177.08	818.17	745.33	994.17	1773.08	1205.75	1271.5	1325.75	922.5	781.42	1198.25	288	96.9566			406	1412.58	1092.75	1443.83	817.42	1318.58	1370.83	1266.83	994.17	1052	1196.55	385.474	57.358			406	789.5	1145.58	1107.5
	407	1463.33	1301	1181.75	1613.92	1546.58	1266.08	811.08	1219.08	2115	1116.58	813.17	692.25	960.42	1706.42	1167.42	819.67	759.5	994.5	1791	1180.5	1273.17	1340.33	946.92	786.92	1202.77	292.525	98.4799			407	1421.75	1099	1455.92	815.42	1299.75	1367.83	1272.75	995.42	1057.04	1198.32	387.24	57.6207			407	787.83	1148.67	1099.25
	408	1463.25	1307.58	1186.75	1639.67	1532.08	1272.5	804.75	1217.17	2112.17	1074.33	804.58	700.17	955.67	1698.25	1163.92	819.17	752.33	966.92	1793.17	1213.33	1279.5	1345.75	911.75	782.33	1199.88	289.629	97.505			408	1432.08	1093.17	1444.58	816.92	1320.33	1380.17	1302.08	982.92	1056.13	1203.15	392.073	58.3399			408	773	1159.42	1090.17
	409	1457.5	1305.92	1187.08	1598.42	1558.67	1264.67	821.58	1199.33	2104.58	1066.17	810	699.83	976.17	1695.33	1151.5	820.08	767.42	960.17	1790.17	1205.5	1268.92	1355.5	919.92	777.25	1198.4	288.153	97.0083			409	1408.75	1077.5	1426.67	817.08	1316.5	1379	1305	993.25	1051.83	1197.29	386.207	57.467			409	787.42	1162.17	1108
	410	1445.08	1285.33	1203.75	1616.75	1553.83	1281.67	812.92	1189.75	2092.42	1075.25	805.58	694	961.17	1677.17	1159	821.17	748.92	972.42	1784.08	1196.5	1265.33	1349.25	912.67	793.5	1195.73	285.48	96.1081			410	1412.25	1082.67	1415.92	818	1316.58	1373.92	1270.83	987.17	1060.46	1193.09	382.009	56.8423			410	772	1174.92	1094.75
	411	1436.58	1277.75	1197.25	1610.5	1571.08	1272.25	812.92	1200.42	2079.5	1080.92	803.83	693.08	961.08	1673.5	1154.67	821.33	750.42	973.92	1763.92	1209.33	1263.08	1348.75	907.33	776.83	1193.34	283.093	95.3048			411	1424.83	1084.25	1420.33	821.92	1320.5	1374.17	1271.25	970.67	1068.75	1195.19	384.106	57.1543			411	791.67	1263.58	1099.42
	412	1442.08	1292.92	1185.5	1637.08	1560.67	1282.17	795.92	1194.08	2077.5	1070.58	818.58	685.25	949.25	1657	1157.83	819.67	753.42	973.08	1779	1192.25	1253.42	1373.25	917.33	791.58	1194.14	283.892	95.5737			412	1418.83	1079.5	1411	818.67	1302.92	1365.67	1270.58	997.92	1058.13	1191.47	380.389	56.6013			412	781.58	1158.5	1094.08
	413	1448.5	1285.92	1202.58	1628.58	1574.75	1266.33	806.92	1196.33	2078.08	1092.33	802.17	678.67	953.17	1694.08	1154.25	822.75	764.25	968.42	1751.33	1203.67	1257.58	1374.92	932.67	779.83	1196.59	286.337	96.3967			413	1419.25	1097.17	1408.33	823.33	1318.25	1350.67	1254.08	990.83	1075.96	1193.1	382.017	56.8435			413	785.25	1163.75	1084.17
	414	1455.42	1299	1202.5	1664.33	1554.42	1265.75	792.75	1175.42	2068	1094.75	811.33	677.17	947.75	1654.5	1162.92	824	751.75	963.83	1762	1189.08	1243	1368.67	922.5	780.25	1192.96	282.712	95.1764			414	1410.17	1104.58	1424.33	822.17	1312.83	1364.17	1288.92	985.58	1071.67	1198.27	387.189	57.6131			414	790.33	1161.25	1087.42
	415	1432.17	1281.5	1204.58	1613.42	1606.33	1264	857.58	1200.5	2086.67	1085.25	811.08	682.83	955	1655.25	1149.67	802	752.5	959.58	1758.5	1105.25	1260.58	1394.75	895.67	784.17	1191.62	281.368	94.7239			415	1416.42	1100.17	1429.83	829.08	1315.42	1368	1281	978.17	1065.46	1198.17	387.092	57.5987			415	787.83	1175.17	1095.58
	416	1432.08	1285.58	1192.75	1644.67	1593.75	1273.17	858.67	1177.92	2062.75	1092.67	814.08	684.75	948.58	1675.75	1142.67	803.33	754.25	970.5	1753.25	1126.58	1256.08	1454.33	905.67	793.42	1195.72	285.469	96.1045			416	1404.83	1096.42	1425.42	823.92	1322.33	1356.5	1283.75	971.67	1066.46	1194.59	383.509	57.0655			416	791.5	1159.5	1089
	417	1435.75	1272.83	1231.42	1618.42	1594.17	1289.33	839.5	1167.33	2067.5	1090.42	791.08	673.42	962.33	1650.42	1150.92	806.58	751.75	971.17	1755.83	1111.75	1233.92	1401.17	933.08	779	1190.8	280.545	94.447			417	1410.58	1111.25	1414.17	829.25	1314	1389	1305.33	980	1065.71	1202.14	391.063	58.1896			417	798.5	1164.58	1099.92
	418	1450.92	1290.25	1224.75	1658.5	1598.42	1252.42	853.5	1186	2059.17	1094.83	809.83	668.67	960.75	1639.75	1141.08	818.42	742.17	960.83	1752.42	1116.33	1235.33	1395.83	935.17	772.92	1192.43	282.178	94.9965			418	1402.58	1110	1431.33	826.67	1326.08	1371.33	1318.17	994.17	1080.96	1206.81	395.73	58.884			418	794.92	1168.92	1081.25
	419	1432.67	1288.67	1236.83	1614.58	1615.5	1261.83	850.5	1174.67	2032.08	1099.83	808.83	656.92	956	1628.42	1157.42	822.75	758	1018.58	1743.42	1096.33	1241.67	1400.17	918.92	785.67	1191.68	281.427	94.744			419	1423.42	1114.58	1411.25	830.25	1335.67	1383	1337.75	990.17	1068.75	1210.54	399.458	59.4387			419	785.08	1180.83	1084.83
	420	1426.67	1293.58	1227.83	1642.5	1629.42	1261.42	844.17	1186	2044	1108.17	810.17	674.17	963.5	1625.5	1140.92	806	767.5	955.5	1761.08	1090.83	1231.67	1506.25	918.25	791.42	1196.1	285.855	96.2345			420	1404.83	1136.92	1404.17	825.33	1331.33	1374.75	1285.67	985.33	1072.67	1202.33	391.253	58.2179			420	804.83	1174.5	1087.75
	421	1446.5	1273.08	1240.17	1634.67	1631.17	1271.58	840.08	1174.17	2050.33	1110.83	821	654	957.17	1637.08	1151.33	821.33	746.5	957.58	1727.25	1110.17	1241.83	1397.58	915.5	836	1193.62	283.371	95.3982			421	1410.08	1130	1419.08	809.17	1322.67	1377	1309.58	987.75	1059.17	1202.72	391.642	58.2758			421	778.75	1181.83	1084.08
	422	1432.25	1261.5	1245.42	1670.42	1625.67	1278.67	842.25	1181.17	2026.67	1109.08	798.92	658.08	947.17	1616.67	1146.92	817.42	759	961	1737.08	1112.08	1241.42	1409.17	929.33	831	1193.27	283.015	95.2784			422	1406.17	1126.58	1406.83	840.17	1311.67	1370.17	1324.92	995.75	1063.38	1205.07	393.991	58.6253			422	785.33	1159.5	1072.75
	423	1420.17	1267.83	1255.17	1627.17	1615.5	1293.33	834.33	1161.75	2014	1103.67	808.17	645.83	955.33	1612	1143.58	813.75	766.42	966.25	1712.42	1103.08	1233.83	1452.08	926.75	823.5	1189.83	279.58	94.1219			423	1419.92	1138.83	1400.17	828.92	1321.33	1370.42	1297.92	989.75	1069.58	1204.09	393.013	58.4798			423	797.83	1173.33	1072.75
	424	1448.5	1273.33	1229.08	1644	1620.58	1285.67	832.58	1166.42	2009.08	1082.42	805.17	644.5	953.75	1613.83	1127.33	805.75	760.92	957	1723.83	1105.83	1241.42	1391.08	926.75	823.08	1186.33	276.079	92.9434			424	1401.58	1125.33	1399.33	808.92	1320.58	1349.5	1316.42	978.08	1069.75	1196.61	385.53	57.3663			424	791.75	1189.67	1080.5
	425	1425	1264.75	1243.25	1628.5	1628.42	1306.67	831.42	1165.33	2008.08	1123.42	805.25	653.33	1011.42	1612.75	1129.67	879.92	755.5	957.42	1733.08	1099.5	1223.17	1396.58	928.83	832	1193.47	283.219	95.3471			425	1418.42	1130.08	1400.75	820.92	1327.08	1344.08	1309	984.75	1076.83	1201.32	390.243	58.0676			425	788.33	1175	1094.5
	426	1451.25	1279.83	1256.17	1666.75	1652.75	1296.83	821.33	1163.58	1993.08	1109.42	814.83	653.5	955	1606.42	1141.83	809.42	761.58	977.17	1716.83	1101.42	1217.83	1391.67	922.67	832.08	1191.38	281.135	94.6455			426	1419.25	1141.08	1403.25	820.17	1323.5	1363.08	1301.67	992.75	1067.46	1203.58	392.499	58.4032			426	793.17	1174.25	1076.58
	427	1442.67	1249.83	1278.5	1637.75	1657.08	1313.33	848.33	1165.08	2009.67	1109.58	809.33	647	958	1589.5	1125.5	821	759.08	957.17	1694.92	1088.58	1228.67	1418.5	921.92	830.33	1190.06	279.805	94.1978			427	1425.5	1142.42	1393.25	809	1305.5	1366.83	1335.58	988.17	1067.54	1203.75	392.674	58.4293			427	804.75	1183.5	1074.08
	428	1430.75	1267.75	1281.58	1664.75	1663.58	1317.33	846.25	1159.75	1982.58	1118.5	797.83	644.33	953.08	1583.08	1121.5	809.83	756.92	967.08	1690.67	1106.25	1212.83	1400.92	933.58	846	1189.86	279.613	94.1332			428	1422.42	1136.92	1398.92	812.67	1318	1344	1320.25	991.83	1064.75	1201.08	390.004	58.0321			428	803	1189.5	1068.08
	429	1443.5	1266	1294.92	1642.42	1647.42	1346.5	841.42	1150.17	1986.25	1113.92	810	649.58	956.67	1593.08	1129	798.17	758.08	966.42	1695.17	1096	1207.33	1412.75	923	841.08	1190.37	280.119	94.3034			429	1430.75	1128.58	1390.58	823.83	1334.42	1351.33	1326.25	996.58	1080.71	1207	395.923	58.9128			429	800	1182.83	1072
	430	1439.67	1251.92	1299.25	1655.33	1672.42	1340.17	844.17	1172.58	1993.67	1116.33	801.83	640.08	945.58	1601.67	1116.33	795.5	749.58	952.33	1684.25	1087.5	1210.58	1399.58	929.58	848.42	1189.51	279.263	94.0154			430	1403.83	1161.25	1399.08	813.42	1325.17	1352.67	1310.58	1012.42	1075.71	1206.01	394.934	58.7656			430	804.42	1173.33	1068.67
	431	1446.25	1273	1316.75	1641.25	1676.17	1348.58	845.58	1166.58	1992.17	1107.17	822.17	669	946.67	1586.08	1136.92	807.33	762.67	966.17	1691.83	1091.25	1207.17	1412.92	926.33	848.58	1195.36	285.108	95.983			431	1407.58	1157.92	1389.17	809.08	1324	1494.08	1308.17	1011.92	1077.96	1219.99	408.907	60.8447			431	792.75	1172.17	1062.5
	432	1434.42	1260	1329	1661.92	1672.92	1354.08	848.33	1166.42	1977.08	1136.42	795.17	644.25	941.25	1588.33	1123.08	799.58	759.75	962.33	1696.83	1151.5	1195.42	1413	933.08	848.83	1195.54	285.291	96.0447			432	1419.75	1162	1389.75	816.83	1318.08	1500	1327.25	1015.42	1096.92	1227.33	416.253	61.9379			432	794.5	1184.33	1050.17
	433	1435.58	1256.42	1327.17	1631.92	1670	1348	844.83	1174.08	1956.83	1120.33	816.92	640.75	1183.67	1572.33	1127	803.42	765.67	946.92	1706.17	1070	1201.5	1414.75	938.25	856.92	1200.39	290.143	97.6781			433	1431.33	1165.75	1382.75	801.83	1322	1496.83	1322.5	1013.92	1082.67	1224.4	413.318	61.501			433	781.5	1186.58	1048.67
	434	1440.92	1256.33	1330.08	1646.5	1694.83	1354	843.08	1223.67	1959	1121.5	810.67	642.25	959.08	1552.08	1121.17	796.83	773.17	973.5	1674	1078.58	1197.33	1409.83	950.17	850.75	1194.14	283.888	95.5724			434	1422.5	1168.25	1374.25	804.58	1341.25	1489	1317.5	1024.17	1086.21	1225.3	414.221	61.6355			434	793.83	1179	1063.5
	435	1448.25	1253.17	1351.92	1635.67	1680.83	1356.75	848.83	1206.5	1956.25	1114.42	804.92	656.17	947.58	1568.75	1123.83	826.08	762.08	955.25	1690.25	1086.42	1214.75	1413.08	954.75	847.67	1196.01	285.757	96.2015			435	1411.67	1166	1369.75	808.83	1315.92	1478.33	1320.5	1030.75	1091.79	1221.5	410.424	61.0705			435	779.17	1190.25	1048.25
	436	1445.75	1245.08	1373.58	1655.17	1687.33	1367.58	837.33	1205.58	1970.75	1137.92	810	634.83	940.75	1546	1127.25	799.67	780.75	959.58	1685.33	1075	1192.25	1426.33	960.58	1031.67	1204	293.753	98.8932			436	1414.58	1191.67	1356.58	804.08	1317.75	1487.67	1329.58	1055.25	1085.58	1226.97	415.891	61.884			436	795.58	1206.58	1049
	437	1425.58	1246.5	1374.08	1656.92	1687.42	1366.33	834.17	1213.33	1932.17	1135.5	802.92	650	943.17	1545.33	1111.58	801.08	772.67	952	1670.5	1079	1201.67	1404.58	955.58	1053.25	1200.64	290.389	97.7608			437	1414.75	1172.42	1374.33	803.67	1314.42	1499.17	1315.42	1036.08	1088.67	1224.33	413.246	61.4903			437	798.17	1189.08	1058
	438	1436.08	1250.42	1401.83	1664.42	1692.92	1366	838.17	1206.5	1957.25	1117.25	793.75	633.92	940.92	1540.33	1115.33	795.5	774.08	945.67	1681.67	1075.58	1186.25	1417.42	948.83	750.25	1188.76	278.514	93.7632			438	1409.83	1165.92	1356.83	810.42	1310.67	1518.92	1316.5	1051.25	1101.25	1226.84	415.763	61.8649			438	795.42	1205.17	1053
	439	1424	1236.83	1391.92	1666.17	1716.92	1383.25	829.67	1208.67	1942.17	1121.83	804.92	641.67	948.67	1540.67	1120.33	809.17	778.42	953.67	1658.5	1065.58	1200.33	1423.33	952.33	743.75	1190.12	279.865	94.2181			439	1408.83	1175.08	1365.83	784.33	1323.17	1507.67	1332.17	1047.42	1102.83	1227.48	416.401	61.9598			439	791.33	1189.5	1046
	440	1420.42	1251.33	1417.08	1576.83	1682.08	1391.08	830.5	1215.08	1928.25	1116.08	827.5	636.58	959.67	1542.17	1116.75	809.42	775.83	949.08	1651.92	1072.42	1184.58	1419.58	948.83	754.33	1186.56	276.308	93.0204			440	1409.75	1170.42	1371.17	790.83	1326.33	1499.92	1323.42	1051	1097.33	1226.69	415.606	61.8415			440	783.5	1204.5	1053.5
	441	1443	1241.5	1409.67	1652.08	1679.42	1399.5	834.67	1210.83	1939	1135.42	817.33	639.58	942.92	1538.75	1114.58	818.17	786.83	948.25	1662.5	1056.42	1161.67	1432.67	963.92	744.25	1190.54	280.289	94.3606			441	1417.67	1178.42	1366.42	773.33	1330.75	1519.33	1334.83	1061	1099.67	1231.27	420.189	62.5235			441	798.17	1193.58	1046.75
	442	1437.75	1236.33	1421.75	1586.67	1719.58	1384.75	825.75	1239	1930.42	1127.67	804.75	642.33	934.5	1523.25	1113.42	812.5	775.83	951.08	1655.92	1060.42	1184.42	1411.83	966.42	759.17	1187.73	277.48	93.4149			442	1441.17	1169.83	1363.58	787.33	1309.5	1535	1326.83	1062.33	1113.75	1234.37	423.289	62.9847			442	794.25	1205.25	1046.42
	443	1430.75	1254.83	1434.5	1645.67	1707.92	1381.33	825.75	1220	1916.08	1142.42	820.33	646.17	929.25	1530	1109.25	813	774.17	949.17	1646.92	1063.17	1186.5	1419.67	953.67	744.58	1189.38	279.129	93.9702			443	1418.08	1177.25	1370.58	785.75	1327.58	1500.33	1321.67	1060.58	1109.08	1230.1	419.02	62.3495			443	799.5	1197.5	1040.75
	444	1433.58	1231.33	1434.42	1607.5	1693.42	1390.08	827.83	1242.25	1888.92	1144.17	815	640.75	928.67	1510.25	1108.25	813.08	797.42	927.33	1641.33	1058	1169	1423.58	977.75	750.67	1185.61	275.358	92.7005			444	1433.58	1161.08	1364.75	781.5	1337.5	1509.17	1316.42	1072.92	1113.54	1232.27	421.193	62.6729			444	791.17	1189.92	1038.83
	445	1438.17	1235	1460.33	1644.25	1713.25	1393.42	829.67	1243	1881.75	1140.33	810.58	643.42	948.42	1516.83	1098.58	821.17	785	949.5	1647.67	1057.08	1168.08	1426.75	973.33	740.08	1190.24	279.986	94.2586			445	1431.42	1152.83	1364.42	786.5	1326.83	1507.58	1200.67	1063.75	1118.58	1216.95	405.873	60.3933			445	777.42	1206.67	1024.25
	446	1426.42	--	1492.58	1603.17	1696.5	1388.67	834.33	1238.33	1877.08	1149.17	792.58	634.5	939.17	1521.83	1115.67	819	775.25	929.42	1624.08	1055.25	1162.33	1428.33	975	746.58	1183.71	273.456	92.0604			446	1446.92	1158.75	1375.75	779.33	1337.75	1497.25	1201.58	1095.08	1118.79	1223.47	412.387	61.3625			446	782.67	1211.17	1036.67
	447	1416.67	--	1474	1652.92	1695.08	1388.25	825.17	1231.08	1860.83	1164.75	822.08	611.67	939	1512.17	1088.83	818.33	772.17	921.5	1623.92	1043.5	1164.33	1429.08	964.92	737.33	1180.76	270.514	91.07			447	1445.67	1149.33	1341.42	787.25	1333.58	1520.25	1330.17	1085.17	1122.17	1235	423.921	63.0788			447	779.67	1203.75	1047.58
	448	1421.33	--	1480	1622.25	1692.83	1406.75	823.92	1241.58	1869.5	1153.42	802.42	612.58	933.75	1516.58	1092.17	836.75	772.17	941.58	1623.08	1040.25	1163.58	1414.08	965.08	743.42	1181.26	271.014	91.2382			448	1445.42	1152.33	1373.83	786.42	1333.75	1509.5	1321.08	1111.42	1123.88	1239.74	428.657	63.7834			448	780.42	1196.67	1032
	449	1421.08	--	1477.33	1650.83	1721.17	1379	961.33	1235.83	1871.08	1165	794.92	612.83	941	1493.83	1142.58	826.42	765.75	949	1622.25	1053.83	1155.33	1417.75	980.75	753.92	1190.99	280.742	94.5131			449	1471	1149	1369.33	782	1331.58	1494.33	1318.58	1105.25	1111.33	1236.93	425.853	63.3663			449	769.58	1219.25	1025.58
	450	1541.33	--	1499.83	1640.08	1712.33	1403.92	970.67	1245.08	1871.42	1166.08	799.17	612.5	934.25	1490.75	1100.83	815.83	783.58	941.42	1632.58	1045.17	1138.33	1411.5	984.42	748.83	1195.21	284.963	95.9342			450	1441	1154.83	1370.67	802.67	1345.25	1483	1302.92	1103.17	1134.33	1237.54	426.458	63.4563			450	777.5	1191.92	1049.08
	451	1535.33		1496.42	1669.17	1698.75	1398.08	963.67	1255.33	1859.75	1173.67	806.67	613.17	944.17	1483.75	1102.25	814.75	764.42	942.58	1624.75	1049.75	1143.25	1408.83	975.33	757.58	1194.84	284.594	95.8101			451	1443.5	1155.92	1370.75	789.08	1340.58	1515.83	1305.83	1114.08	1131.75	1240.81	429.733	63.9437			451	785.58	1215.33	1034.58
	452	1542.58		1495.92	1643.42	1722.33	1394.92	1005.25	1251	1846.08	1165.33	791.92	610.25	940.33	1486.58	1105.75	816.33	762	1064.75	1604.5	1059.42	1144.17	1417.5	975.42	748.25	1199.74	289.489	97.458			452	1445.75	1156.33	1376.92	786.83	1349.75	1518.5	1294.5	1112.17	1128.71	1241.05	429.971	63.979			452	776.25	1203.75	1030.42
	453	1524.17		1509.67	1696.5	1717.58	1394.83	969.33	1250.75	1836.17	1178.92	803.25	621.58	934.75	1513.25	1105.58	814.33	771.92	944.25	1605	1034.08	1135.5	1412.83	977.67	748.33	1195.66	285.413	96.0856			453	1439.92	1166.92	1372.33	795.25	1336.42	1526.08	1307.92	1126.67	1130.63	1244.68	433.602	64.5193			453	788.58	1206.58	1023.83
	454	1541.67		1492.83	1664.67	1710.75	1394.33	954.5	1242.75	1822.25	1180.75	805.92	619.75	942.42	1492.42	1108.83	817.25	773.17	944.5	1609.67	1048.75	1134.33	1403.92	968.42	747.42	1192.23	281.979	94.9297			454	1461.42	1162.83	1381	805.42	1347.5	1518.33	1274.58	1133.83	1123.58	1245.39	434.308	64.6243			454	775.75	1195.75	1021.25
	455	1534.25		1503.17	1752.25	1720.83	1398.67	960.42	1251.92	1839.58	1171.17	802.92	613.75	948.42	1479.33	1090.58	835.92	768.5	927.25	1607.58	1056	1144.75	1413.25	972.58	737.25	1196.97	286.721	96.5262			455	1449.83	1141.08	1350.58	786.75	1336.67	1506.33	1288.42	1116.75	1129.04	1233.94	422.859	62.9207			455	726.92	1206.92	1020.67
	456	1532.42		1499	1733.58	1730.58	1394.83	949.92	1275.5	1817.25	1189	807.17	616.33	942.17	1488.5	1093.33	820.83	770.83	931.58	1608.08	1036.33	1139.58	1405	972.5	740.75	1195.44	285.187	96.0098			456	1473.75	1167.17	1368	793.83	1332.83	1499.5	1301.92	1125.08	1124.79	1242.99	431.906	64.2669			456	785.5	1187.5	1024.08
	457	1532.08		1484.75	1728.5	1736.75	1381.5	964.42	1262.17	1838.67	1191.08	799.08	616.83	936.5	1481.67	1085.42	813.75	780.25	946.58	1595.67	1032.75	1138.75	1407.25	971.5	736.42	1194.01	283.765	95.5308			457	1494.08	1162.17	1378.33	792.08	1353	1485.5	1307.67	1147.67	1116.71	1248.58	437.499	65.0992			457	798.92	1189.25	1041.58
	458	1513.25		1491.5	1724.25	1719.33	1394.5	962.33	1251.83	1801.67	1184.17	805.17	619	932.17	1472.75	1098.17	815.75	764.08	933.92	1597.75	1035.75	1111.17	1422.5	964	736.08	1189.18	278.928	93.9024			458	1503.92	1154.17	1377.58	783.75	1359.5	1507.08	1315.08	1137.58	1116.5	1250.57	439.493	65.3959			458	795	1213.5	1041.67
	459	1515.92		1505.58	1760.17	1713.17	1359.25	951.08	1254.42	1826.42	1199.67	838.08	612.33	934.5	1465.33	1077.92	863.92	792.17	937.17	1587.92	1034.83	1134.92	1403.75	979.5	740.83	1195.17	284.917	95.9189			459	1521.92	1157.67	1401.92	790.67	1341	1484.33	1309.33	1143.75	1114.92	1251.72	440.643	65.567			459	796.33	1187.75	1018.17
	460	1518.58		1484.58	1763.17	1718.92	1367.08	954.08	1254.17	1806.75	1216.17	809.5	606.5	940.5	1483.67	1091.75	816.92	774.75	927.17	1580.33	1031	1121.5	1410.17	967.08	730.67	1190.22	279.968	94.2526			460	1514.75	1148.33	1389.25	798.5	1347.17	1469.67	1294.33	1134.83	1112.96	1245.53	434.452	64.6458			460	793.92	1198	1017.5
	461	1531.75		1486.17	1776.92	1746.75	1355.08	958.42	1246.33	1821.33	1204.33	807	605.83	930.25	1459	1079.42	822.08	779.5	941.08	1618.92	1036.67	1121.75	1397.25	973	738.83	1192.94	282.692	95.1696			461	1524.92	1157.25	1388.92	795.08	1342.17	1467.17	1300.42	1130.17	1116.21	1246.92	435.843	64.8528			461	795.5	1198.67	1014.42
	462	1499.83		1496.83	1776.33	1732.58	1384.75	956.25	1271.5	1820.92	1206.42	820.75	612.08	941	1464.5	1089.25	831.58	783.92	924.5	1582.67	1024.67	1115.58	1393.5	940.67	745.5	1191.98	281.732	94.8464			462	1526.5	1147.17	1397.75	791.58	1365.08	1489.58	1302.92	1141.17	1116.42	1253.13	442.05	65.7764			462	787.33	1198.5	1023.33
	463	1495.83		1490.75	1802.42	1749.58	1382.67	955.42	1252.67	1790.58	1211.58	829	609.08	924.17	1453.67	1086.58	823.92	765.08	931	1571	1034.42	1109.42	1404.58	944.33	741.92	1189.55	279.301	94.028			463	1517.33	1146.92	1401.92	806.75	1366.5	1460.75	1273	1146.17	1104.13	1247.05	435.972	64.872			463	787	1192.58	1017.58
	464	1505.42		1498.17	1801.33	1746.67	1369.5	950.08	1249.92	1785.83	1212.08	810.42	608.67	1032.75	1431.83	1105.25	862	777.83	934.83	1578.17	1029.67	1095.67	1399.33	1010.42	729.33	1196.75	286.497	96.4505			464	1551.5	1141.08	1391.92	801.33	1378.08	1458.25	1279.25	1152.5	1115.08	1252.11	441.03	65.6246			464	790.17	1194.67	1016.25
	465	1495.67		1483.08	1850.75	1733.42	1378.67	953.08	1268.42	1789.5	1215.67	810.75	609.83	931.92	1441.75	1095.5	833	772.17	944.5	1571.08	1023.08	1099.92	1402.42	1020.5	737.67	1194.02	283.765	95.531			465	1552.42	1134.83	1398.58	785.83	1363.92	1447.58	1283.92	1177.33	1115.58	1251.11	440.03	65.4758			465	782.42	1191.25	1010.92
	466	1498.67		1486.08	1813.92	1760.75	1396.17	956.83	1254.08	1796.25	1213.83	808.17	606.92	926.83	1458.83	1073.42	812.75	785.75	944.08	1560.67	1018.25	1111.92	1403.42	1039	709.17	1192.86	282.609	95.1418			466	1553	1126.67	1404.92	797.75	1372.25	1458.5	1297.5	1188.58	1103.71	1255.88	444.796	66.1849			466	797.58	1194.92	1020.58
	467	1488.33		1509.58	1826.92	1757.42	1398.08	946.83	1254.58	1794.75	1220.67	803.08	608.33	922.83	1429.92	1072.17	816.08	784.25	935.58	1577.33	1020.25	1112.33	1398.67	1022.67	708.75	1191.71	281.463	94.7559			467	1570.83	1132.75	1405.33	803.25	1369.5	1451.58	1315.42	1174.92	1106.5	1258.9	447.818	66.6346			467	798.17	1175.17	1004
	468	1495.83		1494.42	1825.58	1751.08	1369.17	957.67	1241.92	1755.58	1223	808.67	605.17	939.17	1434.25	1071.25	821.33	774.92	931.83	1570.33	1021.75	1107.08	1415.67	1026	737.17	1190.38	280.134	94.3086			468	1592.08	1127.58	1387.83	795.75	1383.58	1432.5	1334.17	1178.92	1108.58	1260.11	449.03	66.815			468	864.83	1198.42	1009.42
	469	1488.08		1500.58	1830.83	1764.33	1384	955.5	1246.33	1768.5	1224.25	819.25	611.58	938	1426.17	1087.75	815.67	774.17	927.83	1537.75	1020	1097.75	1397.42	1017.58	731.08	1189.76	279.507	94.0973			469	1620	1117.58	1391.33	808.83	1381	1442.75	1283.33	1181.17	1112.58	1259.84	448.761	66.775			469	854.08	1179.83	1002.75
	470	1468.42		1501.5	1854.75	1754.17	1367.58	944.58	1251.5	1766.75	1219.83	813.42	630.17	936.42	1410.67	1118.75	823.75	777.92	939.92	1568.33	1014	1105.17	1371.83	1018.75	738.33	1191.15	280.903	94.5673			470	1604.58	1108.83	1386.08	817	1378.67	1422.58	1298.42	1184.5	1117	1257.52	446.438	66.4293			470	862	1195.83	995.42
	471	1467.25		1507.67	1828.83	1742.33	1377.08	952.08	1236.58	1747.67	1228.25	807.83	604	943.42	1414.33	1070.08	840.17	771.42	941.42	1535.75	1094.42	1093	1405	1023.25	726.5	1189.49	279.243	94.0084			471	1615.67	1099.08	1386.83	809.5	1412.08	1417.5	1296.75	1207.67	1108.08	1261.46	450.382	67.0162			471	863.17	1195.67	1004
	472	1482.92		1518.08	1822.67	1740.58	1382.17	942.83	1237.42	1773.67	1221.33	812	613.42	943.25	1398.17	1083.75	825.25	776.67	940.67	1543.67	990.25	1084	1374.67	1036.25	734.92	1186.03	275.777	92.8415			472	1633.17	1093.83	1400.83	816.58	1397.08	1420.5	1286.75	1211.42	1117.92	1264.23	453.151	67.4282			472	850.75	1204.67	1005.33
	473	1468		1526.17	1828.83	1770.08	1384.42	944.58	1245.25	1756.42	1228.58	811.17	612	934.25	1417.08	1078.58	828.17	773.08	929.42	1545.5	1022.42	1078.25	1367.67	1032.5	729.17	1187.46	277.21	93.3243			473	1652.33	1075.17	1393.67	813.17	1404.67	1424.92	1292	1209.58	1106.5	1263.56	452.477	67.3278			473	853.5	1198.08	1008.25
	474	1459.17		1507.17	1846.08	1734.75	1394.75	953.92	1249.83	1750.42	1221.67	811.08	604.75	933.92	1410.42	1076.92	830.5	775.58	932.42	1553.58	1011.75	1070.83	1379.75	1044.25	730.58	1186.26	276.015	92.9218			474	1634.17	1073.67	1377.08	816.58	1423.5	1419.83	1291.5	1230.33	1110.71	1264.15	453.072	67.4164			474	873.08	1187.08	989.33
	475	1468.58		1510.42	1822.33	1742.75	1378.75	941.75	1236.33	1758.5	1230.58	805.92	599.5	941.83	1400.25	1064.75	836.25	764.92	933	1546.58	1019.92	1069.08	1390.17	1023.92	726.58	1183.16	272.909	91.8762			475	1622.25	1060.42	1399.83	802.92	1411.5	1418.67	1287.5	1207.08	1111.88	1258.01	446.926	66.5018			475	860.67	1220.92	1001.08
	476	1459.83		1506.17	1832.67	1742.67	1380.67	952.92	1251.08	1749.92	1234.5	817.42	604.83	926.42	1383.75	1064.75	823.17	773.75	928.83	1538.25	1001.67	1066.33	1363.08	1020.58	729.67	1180.56	270.312	91.0019			476	1648.17	1078.25	1382.58	806	1416.75	1423.08	1271.25	1214.42	1104.13	1260.51	449.434	66.8751			476	866.42	1186.25	1003.17
	477	1456.25		1512	1859.5	1738.92	1397.08	949.42	1245.17	1743.33	1240.5	803.75	605.25	935.67	1388.25	1073.08	824.5	765.92	921.83	1550	1008.08	1066.58	1356.83	1027.08	718.58	1182.07	271.818	91.509			477	1670.08	1045	1395.75	828.08	1431.25	1410.58	1282.17	1242.5	1102.29	1267.52	456.442	67.9179			477	872	1182.33	1001.42
	478	1466.92		1480.58	1827.92	1717.17	1406	951.25	1253.25	1752.08	1244.67	812	609.75	933.75	1385.83	1080.33	833.08	764.33	922.83	1519.75	1006.33	1055.25	1386.67	1032.83	718.83	1180.93	270.68	91.1259			478	1665.25	1042.75	1394.67	826.75	1442.92	1414.33	1291.83	1201.92	1112.33	1265.86	454.781	67.6707			478	864.33	1167.5	991
	479	1459.75		1521.5	1849.58	1723.58	1390.08	952.58	1231.17	1732.17	1257.25	818.75	609.25	916.5	1385.25	1057.25	838.42	787.17	927.75	1534.25	987.58	1051.58	1364.42	1030.17	731.25	1180.75	270.5	91.0652			479	1687.67	1038.92	1393.67	821.92	1443.08	1420.17	1286.5	1243.92	1116.21	1272.45	461.371	68.6513			479	866.33	1193.75	1003.75
	480	1456.33		1491.58	1851.42	1732.33	1403.67	947.58	1219.67	1714.92	1254.83	817.08	605	931.75	1379.83	1067.17	832.67	766.75	923.33	1526.5	1020.58	1028.08	1372.67	1042.75	728.33	1178.91	268.655	90.4441			480	1688.58	1035.92	1386.33	819.83	1444.08	1399.58	1309.17	1227.5	1108.38	1268.82	457.739	68.1108			480	871.42	1165.42	1008.75
	481	1449.92		1482.92	1850.58	1736.25	1422.08	950.5	1225.75	1728.75	1232	812.25	604.17	915	1374.42	1078.25	835.75	776.08	923.5	1530.5	1011.08	1025.33	1374.25	1030.42	732.5	1178.36	268.109	90.2601			481	1701.25	1037	1405.58	812.58	1444.5	1386.08	1297.33	1245.33	1100.33	1270	458.918	68.2863			481	858.92	1184.42	999.5
	482	1453.17		1495.33	1870.25	1714.42	1420.33	948.92	1273.58	1715.83	1241.25	822.25	601.58	918.67	1371.58	1074.83	845	773.83	927.5	1513.5	1026.5	1014.08	1360.75	1024.17	719.5	1179.43	269.177	90.6198			482	1712.83	1028.42	1387.42	826.92	1447.67	1399.33	1277.5	1258.42	1099.29	1270.87	459.787	68.4155			482	865.5	1174.33	998.25
	483	1457.67		1497.83	1881.5	1726	1401.58	941.25	1256.75	1712.33	1251.92	803.5	599.08	919.83	1351.83	1066.75	830.92	774.67	911.75	1523.67	1013.92	1005.5	1346.5	1020.42	729.17	1174.97	264.721	89.1197			483	1714.33	1028.83	1413.58	830.58	1448.67	1389.42	1289.17	1258.92	1102	1275.06	463.976	69.0388			483	869.58	1186.83	988.67
	484	1456.08		1481.5	1894.42	1721.33	1416	934.33	1263.67	1710.83	1247.17	814.58	598.17	930.5	1362.08	1062.75	831.83	772.08	923.5	1537.5	1016.75	1032.08	1350.83	1033.92	730.25	1179.22	268.974	90.5514			484	1705.83	1008.92	1407.42	826.25	1453.58	1388.58	1268.75	1269.25	1099.83	1269.82	458.743	68.2603			484	866.75	1178.33	999
	485	1438.58		1497.42	1923.67	1715.58	1408.83	929.75	1262.5	1691.5	1259.67	802.75	599.33	933.92	1346.75	1062	840.5	761.25	912.83	1511.75	1012.42	1017.25	1352.42	1020.33	720	1174.83	264.576	89.0709			485	1719.92	1014.08	1413	835.25	1473.17	1387.83	1286.42	1268.67	1112.71	1279.01	467.926	69.6266			485	875.33	1173.33	991.58
	486	1457.25		1499.08	1902.58	1736.58	1395.83	936.17	1254.25	1692	1266.75	806.83	588.83	941.17	1360.92	1073.92	832	768.42	911.08	1506.58	1015.75	1010.5	1342.33	1026.92	726.08	1176.17	265.916	89.522			486	1710.33	1017.33	1415.58	828.58	1483.5	1386	1274.42	1271.42	1109.25	1277.38	466.299	69.3846			486	880.08	1185.08	999.75
	487	1452.08		1501.42	1912.75	1728.83	1397.33	945.58	1259.83	1682.42	1272.08	826.42	605.5	921.5	1338.33	1059.42	845.42	767.08	915.58	1492	1009.92	1014.67	1337.83	1025.08	723.67	1175.42	265.173	89.272			487	1715.75	1006.92	1431.33	838	1482.83	1375.5	1287.92	1286.83	1103.54	1280.96	469.878	69.9171			487	870.25	1177.67	988.33
	488	1462.67		1487.5	1932.58	1711.08	1384.92	930.58	1248.5	1688.75	1261.25	826.58	609.75	924.58	1339.75	1063.33	846.5	773.42	914.08	1493.25	1001.92	1007	1334.67	1029.75	729.33	1173.99	263.739	88.7889			488		1014.08	1430.5	837	1509.08	1363.5	1296.17	1284.67	1103.63	1229.83	418.749	62.3092			488	879.5	1170.17	997.42
	489	1428.42		1490.42	1951.75	1721.25	1404.67	947.58	1250.42	1675.42	1267.92	811.58	601.25	929.75	1331	1057.67	843.08	781.08	922.25	1497.17	1000.17	1006.25	1326.75	1033.17	721.83	1173.95	263.7	88.7759			489		993.83	1431.92	837.5	1507.58	1365.17	1264	1284.75	1098.88	1222.95	411.874	61.2862			489	881.58	1163.92	992.83
	490	1439.67		1480.08	2017.25	1711.5	1390.5	953.67	1246	1683.42	1255.83	808.58	613.92	934.33	1317.83	1059.67	850	769.83	907.75	1492.67	1013.33	1012.92	1343.67	1040.92	719.83	1176.66	266.41	89.6881			490		1008.33	1435.67	836.17	1497.25	1384.5	1260	1288.08	1093.04	1225.38	414.3	61.6472			490	865.5	1174.58	983.42
	491	1447.67		1495.67	1987.67	1716.33	1392.42	957.5	1247.25	1671.67	1262.25	807.33	600	921.33	1328.67	1054.83	848.08	774.17	915.58	1494.25	1006	998	1336.25	1038.42	727.5	1175.17	264.917	89.1856			491		1021.42	1446	829	1518.42	1370.08	1293	1304.17	1091.04	1234.14	423.061	62.9509			491	871.75	1166	998.67
	492	1429.33		1499.92	2027.08	1713.92	1410.83	954.83	1234.42	1665.67	1523.17	813.08	606.42	912.75	1325.33	1063.92	848.83	767.33	907	1491.25	1005.17	996	1326.08	1035.92	733.08	1186.58	276.33	93.0277			492		1002.33	1452.08	840	1526.83	1367.08	1264.42	1298.17	1091.13	1230.26	419.175	62.3726			492	875.92	1169.33	998.83
	493	1426.92		1475.92	2012.25	1735.83	1398.92	953.75	1252.58	1660.75	1283.75	815.92	610.42	933.92	1314	1031	854.33	773.83	903.08	1485	995.42	991.83	1308.17	1046.17	735.83	1173.9	263.645	88.7575			493		1002.08	1468.33	840.25	1520.92	1381.75	1271.83	1314.67	1102.63	1237.81	426.727	63.4964			493	874.75	1187.42	995.33
	494	1429.67		1494	2047.17	1708.17	1403.08	964.33	1236.83	1676.17	1272.25	808.33	602.17	919.42	1328.08	1049.75	863.58	777.58	899.58	1475.08	997.33	966.67	1321	1037.58	724.08	1174	263.746	88.7913			494		1003.17	1482.42	841.83	1533.42	1364.58	1230.83	1319.42	1104.38	1235.01	423.926	63.0796			494	880.33	1171	988.25
	495	1435.92		1485.33	2051.42	1699	1397	949.08	1223.58	1668.33	1282.67	813.92	619	914.75	1334.58	1063.5	853.25	778.42	896.25	1468.83	1010.42	983	1318.08	1022.08	734.67	1174.05	263.797	88.8086			495		1015.08	1463.67	846.67	1545	1375.08	1229.92	1334.42	1100.96	1238.85	427.77	63.6515			495	872	1181.83	979.5
	496	1431.08		1481.17	2083.08	1706.58	1408.17	956.58	1249.5	1659.08	1275	814.92	604.17	923.83	1327.17	1044.83	861.08	785.08	901	1475.75	974.17	971.83	1324.75	1021.5	730.33	1174.38	264.126	88.9194			496		1052	1474.92	868.67	1575.42	1348	1254.17	1324.75	1097.29	1249.4	438.323	65.2217			496	876.33	1170.42	987.5
	497	1423.08		1495.25	2058.17	1692.83	1400.75	948.58	1248.17	1645.42	1292.83	807.67	600.83	915.92	1307.67	1053.5	862.25	781.83	893.75	1481.67	1002.17	974.83	1309.83	1032	726.58	1171.98	261.732	88.1133			497		1040.83	1492.42	879.42	1547.92	1341.92	1256.75	1343.42	1091.67	1249.29	438.214	65.2055			497	863.58	1183.92	999.5
	498	1410.92		1494.83	2103.08	1698.17	1389.83	962.75	1232.92	1652.92	1289.17	807	605.42	920.67	1312.75	1050.83	851	775.17	902.83	1464.33	990.25	946.58	1325.67	1021.17	730.92	1171.27	261.019	87.8732			498		1039.92	1471.25	869.33	1560.33	1349	1251.92	1334.33	1093.58	1246.21	435.127	64.7463			498	868	1177.5	979.08
	499	1410.08		1506.75	2085.17	1696.92	1404.17	943.58	1242.17	1639.58	1296.5	825.75	595.67	907.25	1306	1048.25	853.75	777.5	897.42	1474	993.67	990	1320.25	1027.92	728.33	1172.64	262.388	88.3343			499		1037.25	1500.5	864.75	1561.92	1335.5	1227.75	1331.58	1101.38	1245.08	433.999	64.5783			499	873.17	1174.92	985.83
	500	1411.42		1495.08	2102.33	1691.17	1376.92	946.83	1230.33	1653	1282.42	813.67	634.75	929.58	1295.92	1040.58	866.08	793.42	898.92	1476	979.83	999.83	1303	1017.58	729.33	1172.52	262.271	88.2949			500		1040.92	1493.42	870.42	1550.83	1356	1240.5	1307.5	1099.83	1244.93	433.847	64.5558			500	875.42	1162.25	974.33
	501	1388.17		1496.33	2108.75	1689.5	1398.25	943.92	1246.75	1613	1314.67	809.08	645.42	915.5	1305.5	1054.33	863.42	789.5	890.67	1459.83	994.5	988.42	1287.67	1017	734.33	1171.94	261.685	88.0976			501		1024.75	1499.58	875.08	1571.83	1329.92	1239.33	1315.58	1099.88	1244.49	433.414	64.4913			501	876.92	1153.58	972.75
	502	1388		1500.25	2149.17	1678.92	1404.5	945.58	1243.58	1608.17	1311.5	815.42	640.83	907.33	1275.67	1035.08	869.92	786.83	897.42	1466.25	986.42	987.25	1300.17	1026.17	738.17	1172.29	262.037	88.2161			502		1021.75	1493.25	870.67	1590.5	1329.75	1238	1322.25	1093.71	1244.99	433.905	64.5644			502	882.17	1155.42	985.92
	503	1395.25		1483.58	2112.83	1674.17	1381.92	951.58	1249.83	1634.17	1333.67	814.42	647.17	903.08	1297.83	1047.33	868.5	780.92	894.83	1472.33	984.75	994.92	1301.25	1022.58	740.83	1173.38	263.13	88.584			503		1040	1490	871.67	1546.42	1321.17	1254.33	1332.75	1090.88	1243.4	432.323	64.3289			503	873.5	1166.17	1005
	504	1400.08		1502.5	2140.42	1684.75	1381.25	959.58	1237.5	1625.67	1333.58	819.5	652	919.58	1278.58	1039.42	870.92	787.83	892	1462.58	978.25	993.33	1304.58	1026.67	741.75	1175.32	265.068	89.2366			504		1042.83	1492.83	873.08	1569.75	1333.67	1231.67	1319.83	1097.79	1245.18	434.101	64.5936			504	890.25	1163.92	1017
	505	1405.5		1486.42	2144.42	1677.17	1414	945.58	1230.75	1626.08	1332.17	816.58	838.58	903.42	1278.75	1042.42	872.58	797.92	889.75	1466.42	974.67	986.5	1291.92	1024.17	740.75	1182.02	271.773	91.4936			505		1026.67	1482.75	885.08	1555.25	1337.5	1238.58	1328.08	1107.75	1245.21	434.127	64.5975			505	883.08	1167.17	1015.5
	506	1402.92		1506.83	2182.58	1679.75	1392.5	951.58	1226.08	1619.33	1322.5	828.08	647.17	904.58	1263.92	1039.75	870.5	802.5	881.25	1449.17	979.67	1001.58	1286.08	1025.25	729	1173.59	263.34	88.6547			506		1039.58	1495.5	884.83	1571.83	1335.25	1262.83	1327.67	1116.29	1254.22	443.142	65.9389			506	891.75	1146.33	1010.17
	507	1398.58		1505.5	2185.42	1670	1388.08	949.83	1230.33	1605.17	1339.17	815.75	631.17	899.58	1288.17	948.67	867.92	797.42	898.92	1444.08	974.33	996.25	1291.42	1014.33	727.5	1168.16	257.906	86.8254			507		1015.75	1478.67	902.42	1548.83	1335.17	1276.83	1321.42	1107.83	1248.37	437.285	65.0673			507	881.25	1151.08	1043.83
	508	1392.25		1518.33	2208.83	1673.83	1383.25	944.92	1226.08	1592.25	1350.42	823.67	640.08	898.83	1275.92	965.42	880.75	799	886.08	1437	986.58	972.25	1292.83	1033.58	726.08	1169.92	259.673	87.4202			508		1030.17	1474.25	890.33	1559.08	1324.67	1288.17	1324.08	1103.88	1249.33	438.249	65.2107			508	887.08	1140.33	1020.67
	509	1377.92		1533.33	2195.08	1652.75	1362.67	956.42	1221.83	1592.83	1333.92	835.33	639.17	898.08	1279.92	950.67	873.83	807.5	900.25	1449.83	969	985.42	1283.83	1038.25	739.92	1168.6	258.348	86.9741			509		1013.17	1461.92	896.25	1575.83	1321.75	1254.33	1339.75	1100.42	1245.43	434.347	64.6302			509	882.67	1130	1011
	510	1398.75		1515.42	2246.08	1673.42	1366.5	950.92	1217.17	1596.92	1351.5	784.33	640.67	907.5	1260.5	961.42	866.75	800.83	895	1428.17	978.83	988.75	1433.42	1025.67	726.83	1174.58	264.33	88.9882			510			1469.83	897	1562	1303.33	1253.17	1341.5	1100.67	1275.36	464.277	69.0837			510	891.58	1141.92	1015.42
	511	1379.25		1539.58	2243.83	1659.58	1372.08	952.5	1219.08	1595.08	1352	803.83	647.42	932.58	1264.17	944.17	883.75	797	891.75	1440.75	975.08	982.42	1289.83	1010.08	738	1170.17	259.916	87.5019			511			1469.25	898.75	1564.17	1299.5	1282.92	1344.25	1097.58	1279.49	468.409	69.6985			511	893.17	1135	1020.67
	512	1391.83		1541.17	2279.42	1651.08	1370.5	948.58	1204.17	1579.25	1365.5	786.25	648.17	903.33	1255.42	956.5	872.83	806.42	890.83	1424.25	977.17	995.83	1293.33	1034.92	747.17	1170.61	260.355	87.6499			512			1478.83	893.75	1555.67	1312.75	1268.75	1330.33	1099.46	1277.08	465.997	69.3397			512	890	1142.83	1029.17
	513	1383.5		1553	2238.92	1645	1387.5	964	1215.08	1568.75	1357.58	781.5	649.83	893.42	1269.17	945.58	875	806.58	896.17	1425.17	969.33	1003.25	1285.42	1016.17	740.83	1168.29	258.043	86.8716			513			1465.92	898.17	1533.17	1294.58	1270	1348.08	1099.29	1272.74	461.664	68.6949			513	890.25	1124.83	1021.17
	514	1382.67		1551	2264.58	1644.17	1377.92	950.92	1226.83	1566.33	1372.58	790.25	640.83	900.08	1254.42	953.67	877.75	818.17	903.75	1419.42	980.42	993.75	1297.58	1078.92	731	1172.91	262.663	88.427			514			1465.92	902.83	1556.75	1306.42	1264	1335.75	1084.54	1273.74	462.664	68.8437			514	893.17	1137.83	1019.42
	515	1367		1565.58	2252.5	1661.42	1379.58	952.92	1209.17	1579	1380.75	800.25	648.92	895	1251.67	950	887.92	810.33	883.42	1441.17	968.67	1167.5	1304.42	1007	749.08	1178.84	268.588	90.4214			515			1467.58	909.25	1560	1306.25	1271.08	1321.75	1096.83	1276.11	465.026	69.1951			515	885.08	1141.5	1012.42
	516	1355.83		1577.67	2288.42	1649.42	1385.92	962.08	1212.08	1579	1362.17	787.25	706.33	896.83	1259.25	953.17	889.67	832	890.58	1431.17	976.92	993	1293	1012.17	733.42	1175.1	264.852	89.1638			516			1461.08	915.67	1558.5	1299.58	1258.75	1324.33	1406.42	1317.76	506.681	75.3934			516	894.25	1140.42	1019.58
	517	1350.08		1567.33	2220.58	1655	1391.5	958.17	1207.17	1562.5	1373.33	780	702.75	908.67	1246.08	943.17	890.08	803.83	890.75	1458	979.58	998.25	1289.33	1021.75	735.17	1171	260.753	87.7838			517			1475.58	920.33	1533	1297.67	1273.25	1351.42	1393.25	1320.64	509.563	75.8222			517	902.75	1140.67	1021.67
	518	1352.58		1584.17	2269.08	1636.5	1382.25	966.17	1187.67	1574.5	1385.42	775.67	747.25	887.67	1229.75	958.83	888.67	810	896.67	1424	966.17	971.67	1300.25	1005.17	746	1171.57	261.32	87.9747			518			1449.17	929.58	1551	1288.08	1273.33	1331	1386.83	1315.57	504.49	75.0673			518	912.92	1127.58	1025.5
	519	1334.42		1602.42	2227.33	1652.75	1405.25	953.17	1196.83	1569.92	1391.75	787.67	695.08	899.83	1241.75	949.5	892.17	809.92	895.25	1415.17	974.5	980.5	1280.83	1012.5	737.75	1169.84	259.587	87.3914			519			1475.67	943.58	1541.33	1290.33	1265.33	1350.17	1394.42	1322.98	511.896	76.1693			519	886.42	1132.33	1024
	520	1337.83		1589.92	2263.25	1654.58	1414.33	951.25	1195.58	1584	1384.75	783.83	714.5	872.75	1244.92	936.08	898.08	813.25	891.25	1407	968.08	976.25	1280	1010.83	752.08	1170.63	260.376	87.6568			520			1473.17	941	1543.67	1272.67	1278.5	1363.58	1407.08	1325.67	514.587	76.5698			520	893.92	1128.75	1022
	521	1355.58		1622.17	2241.83	1650.42	1411.17	961.92	1204.5	1580.33	1414.33	789.17	701.83	897.67	1232.42	946.75	902.58	821.67	888.67	1433.25	974.08	979.92	1268.17	1003.08	739.25	1174.82	264.566	89.0673			521			1468.58	955.83	1533.58	1271.75	1276.42	1336.92	1393.83	1319.56	508.479	75.6608			521	933.17	1118.67	1011
	522	1356		1619.25	2253.5	1627.5	1407.33	969.17	1185.92	1554.17	1425	782.92	709.75	887.17	1254.25	950.75	901.75	804.5	883.42	1432.75	972.42	983.92	1269.83	1011	740.5	1173.16	262.914	88.5113			522			1447.83	952.08	1514	1264.33	1268	1350.08	1400.08	1313.77	502.691	74.7997			522	927.67	1138.67	1016.83
	523	1339.58		1620.58	2212.33	1648.92	1393.25	964.17	1197.83	1566.42	1427.42	795.58	713.92	900.92	1235.17	924.67	890.42	807.17	885.5	1408.58	977.25	989.83	1278.42	1009.67	743.58	1170.92	260.671	87.7562			523			1467.25	975.83	1533.83	1258.5	1273.33	1340.42	1405.83	1322.14	511.061	76.0451			523	940.17	1117.17	1022.5
	524	1346.25		1616.67	2223.17	1620.58	1386.33	951.92	1189.42	1550.67	1412.5	791.17	704.75	886.08	1225.67	935.08	895.17	810.67	887.25	1406.17	960.75	960.17	1268.83	1003.58	742	1164.12	253.874	85.4679			524			1456.83	994.58	1535.67	1272.42	1248.75	1350.83	1398.5	1322.51	511.431	76.1002			524	930.92	1130.5	1024.25
	525	1342		1624.67	2195.58	1622.17	1362.17	978.08	1189.92	1532.5	1417.58	788.83	702.42	892.08	1241.33	955.17	905.08	809.08	884	1403.67	967.92	966.75	1265.75	996.67	741	1164.54	254.29	85.608			525			1453	999.25	1538.33	1258.33	1264.25	1351.58	1399.83	1323.51	512.43	76.2488			525	923.83	1124.33	1013.5
	526	1341		1614.08	2216.08	1618.25	1395.67	963.25	1200.92	1536.08	1421.42	784.75	714.67	889	1222.58	942.25	913	807.5	892.83	1396.67	961.42	968.17	1271.33	1007.58	750.08	1166.46	256.21	86.2544			526			1445.17	998.25	1559.25	1249.58	1257.17	1348.58	1403.92	1323.13	512.051	76.1925			526	929.92	1109.83	1006.5
	527	1343.08		1646.58	2214.17	1633.58	1385.25	957.83	1185.5	1539.42	1413.92	790.08	714.17	875	1241.33	944	902.58	815.67	893.17	1407.83	948.58	977.42	1275.92	984	749.42	1166.89	256.641	86.3996			527			1463.42	993.42	1543.83	1261.58	1285.33	1365.83	1402.83	1330.89	519.811	77.3471			527	933.58	1119.25	1013.75
	528	1330.83		1649.17	2202.83	1607.83	1386.58	970.58	1204.67	1524.58	1431.83	776	715.83	877.67	1230.25	939	921.25	810	895	1405	953.67	967.17	1269.08	1004.92	738.83	1165.76	255.514	86.02			528			1461.08	1007.67	1541.42	1241.75	1275.92	1365.67	1401.08	1327.8	516.719	76.8869			528	940.42	1112	987.83
	529	1335.92		1674.42	2209.83	1632.75	1391.75	964.08	1184.25	1519.67	1421.67	772.17	722.67	875.58	1231.83	943.08	907.17	801.67	890.33	1377.17	952.92	984	1257.83	1013	746.58	1165.67	255.417	85.9874			529			1453.58	1008.67	1548.92	1237.92	1267.25	1369	1422.83	1329.74	518.659	77.1756			529	944.92	1114.08	994.75
	530	1319.08		1645.33	2205.25	1611.58	1366.33	964.17	1195	1533.33	1425.58	783.25	718.83	878.83	1237.33	939.92	910.92	802.83	898.58	1376.5	958.08	963.92	1261	991	749.58	1162.44	252.194	84.9025			530			1440.67	1004.83	1548	1263.58	1271.42	1366.92	1416.25	1330.24	519.159	77.25			530	944.17	1106.75	996.5
	531	1323.92		1668.17	2195.67	1608.5	1396.08	974.33	1159.67	1527.17	1421.67	789.17	739.42	876.58	1220.33	946	948.92	796.25	888.67	1380.58	955	967.08	1252.83	994.33	761.42	1164.86	254.609	85.7154			531			1438.5	1001.08	1535.25	1244.75	1283.17	1355.83	1427.92	1326.64	515.563	76.715			531	940.42	1108.33	1003
	532	1326.67		1664.17	2179.92	1615.58	1389.92	969	1160.33	1522.42	1435.42	772.75	741.58	873	1224.08	943.58	921.08	800.25	876	1375.5	941.5	976	1254.58	996.33	767.33	1162.04	251.793	84.7674			532			1435.83	979.5	1546.75	1238.5	1272.5	1377	1435.08	1326.45	515.371	76.6865			532	948.33	1099.42	978.67
	533	1307.67		1677.25	2187.67	1588.83	1376.33	974.17	1165.42	1508.92	1415.67	782.33	744.75	887.5	1212.17	950.25	912.92	814.25	893.75	1375.08	950.08	980.33	1237.58	993.83	741.58	1159.93	249.677	84.0551			533			1441.08	988.83	1555.83	1240.5	1291	1380.5	1430.08	1332.55	521.466	77.5933			533	951.5	1115.08	1038.5
	534	1320.33		1664.08	2140.67	1607.33	1384.42	985.42	1175.17	1512.17	1426.67	792.5	741.33	881.5	1213.58	941.5	912.83	808.25	881.75	1388.42	945.17	966.33	1239	1010.08	750.33	1160.38	250.134	84.2088			534			1433.75	988.17	1578.42	1234.33	1258.33	1394.5	1436.33	1331.98	520.896	77.5085			534	949.33	1107.17	1030.33
	535	1326.42		1681.75	2172.42	1619.92	1388	961.58	1171.75	1490.67	1414.75	774.08	743.67	871.25	1209.75	942.92	944.33	800.58	883.17	1378.5	963.83	988.58	1245.83	991.08	749.83	1161.51	251.257	84.5869			535			1448.17	996.67	1595	1236.83	1277.83	1472.58	1414.17	1348.75	537.67	80.0045			535	961.33	1093.25	1035.83
	536	1308.75		1689.67	2125.83	1588.42	1398.33	974.92	1164.5	1523.83	1442	771.42	745.42	886.25	1195.5	927.17	934.58	804.83	871.83	1372.17	958	961.33	1244.33	990.25	745.75	1157.61	247.362	83.2757			536			1432.42	992.25	1563.5	1233.75	1283.58	1459.58	1435.25	1342.9	531.824	79.1346			536	947.17	1108.25	1023.92
	537	1313		1671.58	2159.75	1584.92	1405.67	964.42	1164.58	1496	1407.42	770	749.92	867.25	1220.75	925.5	929.25	808.17	895.33	1359.83	945.17	969.75	1245.67	986.25	755.58	1156.34	246.087	82.8465			537			1434.42	994	1591.42	1236.33	1291.42	1448	1432.42	1346.86	535.779	79.723			537	962.08	1085.75	1020.17
	538	1307		1648.83	2103.58	1577.92	1395.75	971.17	1184.75	1509.83	1429.83	774.58	754.67	853.5	1204.58	942.5	936.75	810.08	885.17	1367.25	944.58	960.5	1232.5	991.75	759.25	1154.19	243.938	82.1229			538			1414	1004	1574.5	1234.5	1298.75	1457.92	1446.42	1347.16	536.076	79.7672			538	970.5	1093.75	1038.83
	539	1298.25		1668.33	2142.08	1575	1419.58	962.17	1162.5	1505.08	1427.83	771.75	737.75	882.58	1205.5	937	940.17	806.17	901.92	1361.08	946.58	983.67	1217.17	992.5	749.92	1156.29	246.036	82.8293			539			1426.83	983.67	1606.5	1237.75	1294.17	1458.42	1466.92	1353.47	542.386	80.7062			539	958	1095.67	1031.25
	540	1288.08		1679.42	2101.83	1472.58	1436.67	970.92	1170.58	1491.58	1426.08	773.42	752.75	870.25	1210	934.58	937.42	799.83	899.25	1357.58	944.92	958.67	1234.25	990.08	757.08	1150.34	240.09	80.8275			540			1420.83	996.83	1616.92	1233.42	1310.75	1490.33	1460.83	1361.42	550.336	81.8891			540	963	1098.33	1036.08
	541	1298.92		1660	2117.33	1468.92	1449.25	968.42	1164.58	1507.92	1439.17	770.92	759.08	878.42	1205.5	923	938.75	817.33	889.42	1360.67	932.67	950.42	1225.5	984.83	748.67	1150.42	240.171	80.8549			541			1429.92	1007.33	1599.33	1226.58	1306.5	1476.67	1459.42	1357.96	546.884	81.3755			541	978.5	1085.92	1049.92
	542	1308		1670.67	2087.67	1613.75	1450.42	974	1168.25	1505.17	1440.92	768.75	751.92	873.67	1208	929.42	949.08	811.92	892.08	1354.83	942	951.83	1226.42	963.75	756.33	1156.47	246.222	82.8918			542			1427.33	1006.83	1600.5	1225	1300.42	1492	1468.83	1360.13	549.05	81.6978			542	991	1093.33	1024
	543	1290.33		1660.17	2128.17	1518.08	1443.42	980.17	1164.92	1502.67	1428.75	761.17	762.75	863.17	1190.92	940.75	934.33	819.5	879.67	1343.17	937.33	934.75	1227.5	967.33	760.42	1149.54	239.291	80.5585			543			1422.67	992.92	1608.25	1231	1322.5	1496.58	1486.33	1365.75	554.67	82.534			543	980.58	1088.83	1019.92
	544	1285.67		1664.67	2090.08	1507.5	1462.42	978.92	1158.75	1483.5	1430.08	768.67	748.33	876.17	1201.42	929.5	930.33	806.58	895	1379.17	953.67	959.83	1223.67	956.17	751.92	1149.65	239.403	80.5962			544			1437.75	995.75	1596.42	1205.42	1301.08	1504.42	1491.92	1361.82	550.743	81.9497			544	990.33	1088.67	1016.83
	545	1294.83		1649.25	2122.5	1484.75	1472.58	984.58	1155.75	1517.67	1449.92	766.58	756.5	863.83	1193.58	946.5	955.33	796.58	883.92	1332.33	949.08	948.83	1225.58	964.17	750.25	1150.65	240.397	80.931			545			1430.33	1013.67	1580.92	1215.08	1301.42	1503.42	1487.83	1361.81	550.73	81.9478			545	991.25	1079.17	1023.42
	546	1282.08		1669.67	2095.67	1486.58	1476.42	988.67	1166.42	1516.75	1442.83	754.67	755.58	859.75	1174.5	932.5	937.42	805.33	895.83	1353.67	928.58	942.75	1218.58	961.83	763.83	1148.26	238.007	80.1262			546			1432	1015.42	1597.92	1227.42	1313.75	1513.17	1491.08	1370.11	559.029	83.1826			546	986.5	1080.08	1022.17
	547	1281.58		1658.67	2115.92	1498.92	1469.75	990.75	1138.83	1519.42	1424.92	757.5	753.58	861.58	1191.25	941.17	934.67	816.17	897.17	1341.58	946	952	1221.33	970.17	753	1149.39	239.138	80.5071			547			1423.08	1004.5	1595.33	1222.08	1320.25	1479	1498.17	1363.2	552.121	82.1548			547	990.33	1069.58	1026.5
	548	1270.75		1667.67	2083.25	1477.33	1503.08	987.42	1150.92	1466.75	1424.25	745.08	751.25	860.92	1184.25	942.67	940.08	807	887.75	1352.25	932.42	945.42	1234.42	951.42	755.25	1144.42	234.167	78.8336			548			1433.17	1020.25	1590.25	1210.08	1322.08	1492.25	1500.5	1366.94	555.86	82.7111			548	992.33	1084.33	1022.17
	549	1280.5		1640	2122.33	1480.83	1502	987.33	1151.33	1453.92	1425.08	746.42	755.17	863.17	1193.83	933.5	943.08	819.17	884.25	1342.08	936.58	939.5	1243.42	959.33	760.42	1146.23	235.978	79.4431			549			1422.75	1013.75	1589.42	1220.92	1305.75	1506.17	1525.83	1369.23	558.147	83.0514			549	995.17	1071.17	1028.42
	550	1281.92		1654.08	2013.42	1471.83	1494.17	995.33	1141.58	1475.33	1449.58	748.83	755.58	863.42	1185	919.33	956.08	804.42	872.75	1344.42	953.92	948.83	1215.25	939.25	763.42	1141.21	230.956	77.7525			550			1423.75	1011.17	1588.58	1214.25	1313.5	1483.33	1553	1369.65	558.574	83.115			550	1014.25	1060.67	1013.58
	551	1254.58		1649.67	2086.83	1453.42	1488.42	1002.83	1149.17	1454.67	1422.25	743	756.17	861.83	1188.75	929.75	953	785.75	877.42	1325.5	931.83	943.25	1204.08	963.08	752.08	1138.14	227.895	76.7219			551			1424.5	1012.5	1569.25	1210.83	1342.75	1499.92	1527.83	1369.65	558.574	83.115			551	1011.33	1053.08	1020
	552	1265.83		1661.25	2027.17	1467.42	1499	1001.25	1144.08	1457.67	1424.75	742.33	771.08	863	1184.5	919.58	957.08	797.67	869.17	1324.67	927	946.25	1217.17	944.33	771.25	1138.41	228.163	76.8122			552			1422.17	1001.17	1581	1201.58	1305.5	1480.25	1579.75	1367.35	556.266	82.7715			552	996.5	1068.92	1006.5
	553	1264.92		1638.67	2080.42	1464.67	1490.25	1011	1151.25	1466.83	1443.83	737.92	764.17	858.92	1173	922.42	967.08	833.17	873.83	1323	922.5	935.42	1215	969.5	762.17	1142.17	231.921	78.0775			553			1417.17	1005.33	1577.08	1211.67	1305.92	1478.42	1567.58	1366.17	555.087	82.5961			553	1002.83	1060	1013.92
	554	1264.92		1645.83	2025.67	1460.67	1478.67	999.5	1142.92	1478.25	1294.25	742.67	762.67	858.08	1175.92	930.83	964.17	823.5	875	1345.42	902	941.42	1204.08	949.5	762.17	1131.66	221.407	74.5378			554			1443.83	995.75	1563.83	1200.42	1313.17	1489.33	1558	1366.33	555.253	82.6208			554	1004.5	1058.92	1013.17
	555	1259.92		1620.33	2064.33	1468.17	1508.42	1017.33	1149	1440.08	1292.58	736	759.92	847.75	1172.17	916.92	970.75	822.17	870.08	1330.58	927.42	925	1139.92	936.83	754	1127.38	217.127	73.0969			555			1446.83	1018.42	1577.75	1207.67	1309.5	1499	1574.58	1376.25	565.17	84.0964			555	1020.67	1046.83	1010.25
	556	1248.08		1637.83	2032.5	1470	1512.67	1006.75	1139.58	1453.67	1295.25	735.5	760.25	854.67	1170.75	917	992.42	810.67	875.17	1327.08	924	922.25	1142.83	938.83	767.42	1127.62	217.366	73.1774			556			1434.08	1021.42	1563.75	1222.42	1310.75	1482.08	1564.42	1371.27	560.194	83.356			556	1023.17	1063.75	1016.92
	557	1233.75		1640.42	2044.17	1449.5	1521.92	1025.17	1141.92	1440.67	1308.75	736.08	765.67	864.67	1185.5	920.33	965.92	822.25	873.75	1330.83	920.83	937	1151	943.42	759	1129.67	219.425	73.8704			557			1434.83	1006.08	1553.33	1195.67	1328.5	1493.67	1580.67	1370.39	559.313	83.2249			557	1014.83	1047.83	1017.42
	558	1256.67		1610.08	2034.83	1450.67	1489.92	1012.5	1132.25	1447.75	1314.5	729.83	754.42	849.08	1171.42	933.5	987.08	826.08	883.92	1308.25	941.5	932.83	1139.42	934.83	763.75	1126.31	216.058	72.7369			558			1421.75	1010.25	1572	1203.42	1316.08	1490.75	1589	1371.89	560.813	83.4481			558	1019.08	1061.17	1032.42
	559	1240.75		1630.92	2059.92	1448.25	1868.75	1013.08	1128.5	1436.92	1443.08	725.42	763.25	848.75	1167.67	931.17	996.58	810.83	882.33	1310.08	931.92	930.5	1150.33	942.08	761.5	1148.81	238.558	80.3117			559			1443.33	1006.58	1537.5	1208.33	1321	1469.58	1603.92	1370.03	558.954	83.1715			559	1025.58	1054.75	986.33
	560	1253.33		1624.17	2034.58	1420	1502.08	1016.42	1132.67	1437.17	1391.33	718.92	771.75	856.42	1167	918	999.17	811.75	872.5	1317.75	907.67	907.17	1144.58	923.83	757.92	1125.49	215.236	72.4603			560			1440.17	1008.33	1554	1188.42	1317.08	1473.5	1609.42	1370.13	559.051	83.186			560	1028.33	1046.58	957
	561	1254.33		1643	2049.33	1437.08	1500.58	1009.67	1124.67	1423.58	1374.08	726.5	762.75	857.08	1181.42	927.5	1004.17	832.25	870.5	1311.25	920.5	926.92	1146.92	929.75	760.17	1129.3	219.054	73.7457			561			1423.92	1017.5	1541.67	1195.17	1321.17	1467.33	1594.67	1365.92	554.839	82.5591			561	1028.83	1038.42	943.67
	562	1259.33		1628.92	2051.08	1428.75	1501.75	1030.33	1125.58	1428.83	1405.25	725.5	753.25	852.5	1175	927.17	1013.58	829	867.92	1297.83	919.25	931.25	1141.58	943.83	765.08	1130.55	220.296	74.1638			562			1435.17	1007.83	1545.08	1202.5	1323.33	1476.83	1600	1370.11	559.026	83.1822			562	1026.58	1045.92	946.5
	563	1234.83		1631.25	2068.58	1421.67	1499.92	1014.92	1153.75	1428.75	1378.25	724.17	756.08	854.5	1176.58	921.5	1003.83	816.67	892.42	1285	915.17	926.33	1141.33	942	761.42	1128.21	217.964	73.3786			563			1422.08	1013.92	1555.5	1208.25	1328.58	1470.75	1608.83	1372.56	561.479	83.5471			563	1020.83	1042	955.42
	564	1225		1641.67	2060.08	1418.42	1491.08	1014.83	1122.58	1403.25	1391.5	742.75	756.92	847.67	1160.92	918.75	1012.25	824.67	860.42	1317.42	910.83	916.92	1139.5	933.67	762	1124.92	214.667	72.2688			564			1297.5	1017.17	1563.83	1204.92	1315.25	1457.67	1604.58	1351.56	540.48	80.4226			564	1024.58	1044.83	921.58
	565	1242.08		1640	2070.83	1436.5	1501.42	1032.67	1137	1426.83	1400.67	721	768.25	840.17	1164.92	922.92	1016.42	822.17	869.5	1305.92	914.92	922.92	1145.08	927.75	767.5	1130.32	220.073	74.0888			565			1416.75	1020.17	1576.42	1205.67	1329.92	1461.92	1615.83	1375.24	564.16	83.9461			565	1049	1040.58	983.08
	566	1231.08		1636.42	2032.33	1417.5	1510.33	1034.92	1126.75	1429.83	1393.42	730.75	769	857.42	1171.08	914.33	1006.67	819.33	869.33	1294.08	911.08	915.33	1144.58	910.17	763.33	1125.61	215.361	72.5025			566			1405.58	1025.83	1555.17	1181.33	1318.17	1473.25	1607.25	1366.65	555.574	82.6686			566	1020	1022.58	988.17
	567	1244.83		1613	2051.83	1433	1515	1025.25	1103.83	1421.75	1400.5	729.25	763.5	847.25	1164.5	924	1009.58	822.33	873.42	1314.5	922.17	931.17	1126.42	931.25	762.5	1127.43	217.177	73.1139			567			1426.25	1037	1549.17	1176.08	1333.08	1484.08	1589.92	1370.8	559.717	83.285			567	1036.83	1035.92	974.42
	568	1224		1634.17	2045	1410.67	1489.75	1034.92	1115.42	1418.42	1398	722.08	765.67	851.75	1172.42	908.25	1009.67	808.33	876.25	1297.5	914.58	923.42	1132.25	939.83	767.75	1124.35	214.102	72.0786			568			1425.83	1022.5	1552.67	1190.5	1358.42	1488.75	1588.83	1375.36	564.277	83.9636			568	1034.58	1034	973
	569	1222.58		1611.08	2036.5	1424.92	1493.08	1018.58	1116.92	1405	1394.67	714.5	761.5	844.08	1153.08	916.17	1021.92	820.58	877.58	1288	925.58	927.58	1131.25	935	762.08	1121.84	211.586	71.2315			569			1423.75	1021.92	1557.08	1172.08	1317.25	1470.58	1573.08	1362.25	551.169	82.013			569	1051.5	1029.92	979.17
	570	1224.92		1608	2026.67	1415.5	1525.67	1050.33	1114.83	1406.33	1422.83	727.58	761.08	837.25	1161	919.42	987.67	812.08	867	1306.42	931.33	924.08	1128.33	927.58	765	1123.95	213.702	71.9439			570			1433.33	1042.75	1534.42	1170.5	1334.58	1477.58	1591.75	1369.27	558.193	83.0582			570	1041.25	1028.75	991.58
	571	1223.92		1611.5	1934	1426	1492.83	1044.67	1126.75	1389.42	1433.92	718.25	761.83	843.67	1155.17	928	1095.58	814.42	879.33	1293.67	922.42	915.08	1132.25	928.75	768.25	1123.46	213.214	71.7797			571			1444	1036.08	1555	1168.33	1322.42	1456.42	1587.67	1367.13	556.051	82.7396			571	1040.17	1041.75	982.58
	572	1230.75		1594.08	1982.08	1428.5	1497	1039.42	1101.33	1399.42	1405.58	717.5	759.25	840.67	1155.08	918.67	1056.42	816.67	863.17	1268.5	918.08	916.33	1127.5	902.83	765.25	1117.57	207.319	69.7949			572			1442.08	1040.33	1531.08	1187.5	1328.58	1431.92	1575.92	1362.49	551.407	82.0485			572	1059.17	1025.33	964.58
	573	1223.92		1606.75	1958.92	1405.17	1485.92	1041.33	1110.83	1393	1441.5	716.33	769.33	838.17	1156	913.33	1067.42	812.75	864.75	1297.42	918.25	924.08	1140	918.83	776.75	1120.9	210.652	70.9171			573			1444.33	1021.25	1521.75	1182.92	1324.75	1450.08	1595	1362.87	551.789	82.1053			573	1061.42	1032.92	972.08
	574	1211.33		1612.33	1966.5	1415.67	1488.5	1034.83	1106.67	1397.83	1418.58	711	776.17	854.33	1177.42	924.92	1290.42	829.83	868.17	1277.75	921.08	907.33	1147.17	928.67	764.58	1131.79	221.536	74.5812			574			1428.5	1052.5	1541.75	1187	1343.25	1455.92	1583.17	1370.3	559.219	83.2109			574	1063.17	1013.92	1040.83
	575	1220		1604.67	1953.33	1402	1492.08	1038.25	1096.42	1375.92	1420.67	713.75	800.83	835.17	1149	921.58	1077.58	813.33	867.83	1286.17	920	917.25	1128.5	901.08	761.5	1117.26	207.007	69.6899			575			1451.08	1038.58	1521.67	--	1337.92	1452.92	1572.25	1395.74	584.657	86.996			575	1080.08	1021.75	1034.75
	576	1204.17		1594.67	1953.83	1402.58	1456.08	1037.67	1099.25	1394.33	1440.17	728.33	766.42	839.5	1148.17	919.92	1069.92	820.67	869.83	1270.42	927.25	906.58	1138.25	912.17	764.5	1115.86	205.606	69.2182			576			1455.83	1039.5	--	--	--	1452.08	1570.25	1379.41	568.335	84.5674			576	1086.92	1029.08	1025.58
	577	1202.08		1593.42	1938.92	1407.42	1482.58	1042	1117.5	1388.58	1434.25	716.67	788.17	846.08	1161.5	913.75	1075.58	808.58	859.25	1271.67	911.58	908.33	1126	912.75	761.5	1116.01	205.757	69.2691			577			1466.08	1040.42				1439.83	1564.75	1377.77	566.69	84.3226			577	1078.75	1030.75	1027.75
	578	1208.33		1588.58	1954.58	1398.92	1478.92	1038.17	1107.17	1395.5	1457	721.25	785.33	837.17	1154.08	907.25	1087	810.58	849.17	1266.08	928.17	891.75	1119.83	913.17	765.08	1115.79	205.536	69.1948			578			1450.42	1036.17				1439	1561	1371.65	560.567	83.4116			578	1064.58	1006	1025.58
	579	1217.67		1571.75	1928.33	1389.67	1462.17	1051.08	1085	1372.92	1447.67	707.58	799.33	852.67	1155.58	904.92	1099.25	799.83	851.42	1279.33	910.92	907.5	1133.33	905.5	765.17	1112.98	202.732	68.2508			579			1465.5	1051.83				1454.75	1547.08	1379.79	568.71	84.6232			579	1066.58	1016.42	1030.08
	580	1201		1558.83	1970.17	1407.83	1466.33	1071	1096.5	1392.83	1446.33	708.17	780.58	840.42	1145.33	921.75	1098.92	801.42	871.17	1265.42	906	900.08	1119	915.25	766.17	1115.24	204.989	69.0106			580			1480.75	1056.83				1447.08	1548.92	1383.39	572.315	85.1596			580	1068.58	1014.67	1008.33
	581	1200.5		1579.17	1900.83	1408.25	1484.33	1048.25	1094.75	1390.67	1489.5	788.25	795.92	842.17	1148.33	914.08	1110.42	798.83	865.5	1328.67	909.83	906.17	1131.92	902.58	762.75	1121.81	211.562	71.2233			581			1475.17	1066.33				1459.75	1547.75	1387.25	576.17	85.7332			581	1060.67	918	1021.67
	582	1187.75		1561.83	1938.33	1392	1461.75	1050.58	1099.58	1384.42	1506.25	798.67	791.42	829.67	1149.33	920.17	1108.42	795.17	856.92	1268.58	905.58	898.33	1120.5	914.17	760.67	1117.4	207.145	69.7365			582			1485.92	1069.08				1469.17	1541.83	1391.5	580.42	86.3656			582	1062.33	909.92	1013.75
	583	1207.83		1560.75	1927.5	1379.58	1462.75	1070.5	1071.5	1375.75	1493.08	796.08	797.17	--	1143	905.75	1119.42	807.92	852.83	1254.67	909	905.75	1116.58	911.33	755.08	1128.36	218.105	73.4263			583			1482.17	1074.67				1449.75	1545.08	1387.92	576.837	85.8325			583	1058.33	904.08	1019
	584	1181.5		1568.08	1917.67	1369.25	1465.5	1052.83	1090	1376.92	1509.75	793.83	806.33	--	1132.92	904.58	1117.33	800.75	851.33	1253.42	915.92	904	1123	895.67	762.67	1126.97	216.716	72.9585			584			1487.58	1080.08				1456.67	1528.75	1388.27	577.19	85.885			584	1094.58	918.42	1029.42
	585	1191.17		1550	1931.75	1393.33	1458.33	1072.08	1076.17	1363.83	1511.75	788.92	802.33	--	1154.17	908.83	1128.67	807.33	857.58	1251.42	909.33	896.08	1104.08	898	757.42	1127.84	217.594	73.2541			585			1477.42	1088.67				1446.67	1535.33	1387.02	575.942	85.6994			585	1090.75	906.08	1013.08
	586	1195.25		1544.17	1916.75	1379.25	1455.17	1052.17	1079.92	1358.5	1501.67	798.42	797.42		1155.33	925.17	1145.33	808.17	861.75	1251.92	914	902.42	1123.33	906.17	757.25	1128.62	218.365	73.5137			586			1492.5	1456				1458.08	1525.92	1483.12	672.045	99.9993			586	1086.25	980.25	1028
	587	1182.67		1545.08	1909.42	1377.67	1451.92	1079.67	1082.17	1362.5	1513.5	793.17	787		1140.33	913.58	1124.42	813.17	868.67	1264.92	911.25	893.42	1107.5	907.08	754.92	1126.55	216.297	72.8174			587			1502.17	1104.33				1455.5	1512.5	1393.62	582.545	86.6818			587	1096.83	967.33	1009.25
	588	1207		1541.75	1888.75	1378	1447.75	1072.25	1079.33	1364.25	1522.67	796.42	792.08		1138.83	907.92	1118	814.17	857.83	1233.25	906.5	894.75	1102.17	904	765.5	1124.23	213.985	72.0391			588			1517.42	1095.67				1424.42	1533.5	1392.75	581.673	86.552			588	1096.5	967.42	1019.92
	589	1181.33		1544.33	1899.5	1377.92	1444.75	1084.75	1092.75	1356.58	1528.58	796.08	800.5		1137.42	910.67	1164.17	810.17	848.92	1256.42	909.92	887.83	1112.08	894.08	763.33	1127.37	217.117	73.0936			589			1512.17	1103.17				1437.33	1530.58	1395.81	584.732	87.0073			589	1075.25	972.08	1006.25
	590	1161.5		1526.5	1884	1377.92	1438	1078.75	1093.83	1350	1511.33	800.5	804.92		1138.92	915.42	1149	801.83	858.58	1237.67	905.42	885.67	1112.92	912.58	755.83	1122.78	212.527	71.5482			590			1521	1113.08				1421	1519.08	1393.54	582.46	86.6691			590	1105.42	961.42	1014
	591	1169.92		1528.25	1884.58	1365.25	1438.75	1092.5	1092.75	1356.42	1535.83	800.83	795.92		1140.92	910.92	1135.33	792.5	839.58	1237.83	905.5	893	1201.75	896.33	770	1126.58	216.325	72.827			591			1550.83	1105.92				1433	1529	1404.69	593.607	88.3279			591	1110.58	950.83	1022.33
	592	1178.83		1524.25	1861.92	1357.08	1434.33	1092.25	1079.5	1346.25	1543.83	807.17	804.33		1139.92	911.42	1170.92	800.5	849	1256.33	903.92	878	1090.92	899.33	760.25	1122.28	212.034	71.3823			592			1546.92	1111.33				1442	1498.5	1399.69	588.607	87.5839			592	1101.5	961.5	1009.75
	593	1173		1545.08	1889.67	1372.17	1455.42	1088.5	1078.33	1354.5	1562.83	805.08	798.58		1131.25	915.42	1163.5	801	854.83	1235.08	904	889.92	1101.58	903.17	766.92	1126.81	216.56	72.9062			593			1540.58	1117.17				1446	1504.83	1402.14	591.065	87.9496			593	1084.42	957.33	1013.92
	594	1174.67		1531	1850	1364.42	1430.33	1094.83	1075.42	1351.67	1530.08	810.17	798.75		1135.42	905.42	1167.92	798.33	842.17	1238.75	891.25	787.17	1087.92	909.58	766.92	1115.55	205.304	69.1166			594			1557.5	1124.83				1443.5	1500.17	1406.5	595.42	88.5976			594	1090.5	956.17	1016.33
	595	1168.42		1522.83	1861.67	1375.25	1405.58	1110.17	1083.17	1349.5	1539.58	802.42	793.25		1137.92	906.67	1182.08	804.25	931.33	1233.42	908.25	863.5	1102.42	897.67	749.92	1124.06	213.808	71.9794			595			1558.58	1142.67				1460.83	1499.17	1415.31	604.232	89.9089			595	1097.92	952.42	1009.17
	596	1177.92		1511.17	1836.75	1367.42	1434.33	1104.92	1083.17	1345.33	1550	814.83	806.08		1138.83	909.42	1207.17	803.33	850	1222.92	897.92	861.5	1091.42	889.75	767.83	1121.46	211.205	71.1032			596			1555.58	1136.08				1463.33	1502.17	1414.29	603.21	89.7567			596	1085	952.08	1004
	597	1165.42		1490.75	1884.25	1357.42	1411.58	1100.42	1095.75	1349.17	1549.17	818	792.25		1136.5	912.08	1186.83	809.17	833.67	1247.67	905.5	859	1097.58	889.67	764.58	1120.75	210.497	70.8648			597			1599.42	1153.5				1449.75	1505.25	1426.98	615.9	91.645			597	1090.58	965.92	995.58
	598	1173		1517.83	1848.83	1363.92	1408.42	1094.25	1077.58	1331.25	1561.67	810	796.33		1126.25	909.5	1199.42	805	834.67	1222.33	902	867.58	1102.83	901.42	762.58	1118.94	208.689	70.2562			598			1615.33	1157.17				1474.92	1485	1433.11	622.025	92.5564			598	1083.67	951.33	1005.42
	599	1183.75		1503.25	1856.33	1354.25	1399.33	1099.58	1069.17	1357.42	1541.67	830.67	800.58		1145.33	899.75	1198.58	802.17	839.58	1232.42	916	857.17	1107.92	887.25	720.92	1118.32	208.072	70.0486			599			1588.42	1181.25				1455.25	1497.83	1430.69	619.607	92.1966			599	1072.08	950	1020.83
	600	1167.92		1508.17	1845.83	1344.67	1393.17	1112.58	1052.25	1344.25	1547.83	806.58	808.92		1142.33	906.17	1188.75	811.25	853.58	1246.83	914.33	850.17	1094.08	887.33	731.42	1116.29	206.041	69.3649			600			1628.58	1178.58				1474.75	1477.25	1439.79	628.71	93.5511			600	1072	953.83	996.67
	601	1158.42		1516.08	1864.75	1359.17	1397.83	1119.92	1074.17	1346.42	1560.58	828.42	799.58		1132	915.92	1194.08	807.67	842.67	1206.42	916.75	853.42	1084.33	893.25	731.17	1118.32	208.069	70.0475			601			1632.75	1170.08				1450.5	1461.5	1428.71	617.627	91.902			601	1070.17	959.08	1008.5
	602	1149.17		1512.5	1788.75	1355.5	1396.67	1104.17	1067.67	1320	1549.67	820.67	797.92		1139.17	908.92	1193.75	804.33	839.58	1457.5	917.25	846.83	1095.5	893.17	726.08	1122.04	211.785	71.2985			602			1618.92	1168.92				1459.92	1480.83	1432.15	621.067	92.4139			602	1062.67	956.08	1000.67
	603	1160.33		1496.75	1843.58	1350.33	1395.83	1106.5	1066.42	1336.75	1538	822.17	805.75		1126.25	907.83	1204.08	802.58	844.67	1217.75	911.67	852.33	1086.33	875.5	723.17	1112.48	202.23	68.0819			603			1632.83	1186.75				1452.58	1472.25	1436.1	625.022	93.0024			603	1071.25	960.17	999
	604	1148.33		1484.58	1798.08	1359.25	1415.75	1104.33	1062	1297.42	1566.67	841	812.08		1127.42	899.83	1197.67	801.58	840.75	1210.67	1318.17	851.42	1074.5	879.83	731.92	1128.33	218.08	73.4176			604			1628.42	1197.67				1442.58	1475.83	1436.12	625.045	93.0057			604	1073.25	945.33	993.42
	605	1157		1488.92	1822.08	1350.75	1412.67	1113.58	1055.25	1327.83	1565.5	824.67	813.33		1131	907.92	1216.33	798	848.58	1209.25	926.08	855.92	1091.33	884.42	736.58	1115.32	205.068	69.0371			605			1651.33	1205.58				1465.75	1465.08	1446.93	635.855	94.6142			605	1077.5	965.42	995.08
	606	1155.5		1479.67	1793.08	1334.58	1386.75	1118.42	1053.33	1317.25	1563.75	829.42	801.25		1139.58	909.83	1207.42	789.83	830.25	1211.67	913.33	856.75	1087.92	882.17	731.67	1108.79	198.542	66.8401			606			1641.75	1194.08				1438.75	1463.5	1434.52	623.44	92.7669			606	1071.92	950.83	1013
	607	1161.5		1480.92	1833.42	1334.83	1399.08	1103.25	1060.42	1321.08	1548.83	831.58	815.83		1126.67	899.92	1189.5	788.75	829	1215.83	926	850.25	1085.33	881.33	739.5	1110.13	199.878	67.29			607			1643.25	1215.33				1444.25	1443	1436.46	625.377	93.0552			607	1097.17	945	997.92
	608	1154.75		1477.83	1796.25	1337.92	1380.08	1127.58	1060.33	1304.5	1566.58	834	813.17		1120.08	902.33	1189	795.25	836.5	1207.83	923.08	848.08	1087.17	908.25	723.42	1108.82	198.567	66.8487			608			1659	1222.5				1436.08	1455.58	1443.29	632.21	94.0719			608	1086.17	933.92	1013.42
	609	1147.25		1473.33	1840.58	1338.58	1401.08	1114	1046.5	1302.08	1570.58	844.67	801.33		1134.17	895.42	1206.17	797	836.75	1200.67	908.08	850.42	1073.75	873.17	716.17	1107.81	197.557	66.5085			609			1654.42	1214				1453.42	1467.33	1447.29	636.212	94.6674			609	1092	944.75	988.58
	610	1137.75		1475.58	1786.17	1335.33	1379.42	1105.5	1050.25	1314.33	1595.83	840.17	800.42		1118.17	905	1204	791.58	829.75	1213.25	912.08	842.33	1077	883.17	728.92	1105.73	195.477	65.8084			610			1650.33	1212				1453	1442.83	1439.54	628.46	93.5139			610	1105.25	949.08	988.92
	611	1161.17		1465.17	1822.92	1327.5	1377.08	1105.58	1042.92	1309.67	1575.42	846.67	806.17		1128.42	893.5	1202.92	798.83	832.67	1192.75	908.67	849.92	1080	879.75	723.92	1105.98	195.733	65.8944			611			1663.67	1235.17				1461.92	1446.17	1451.73	640.653	95.3281			611	1092.83	935.83	989.5
	612	1144.17		1444.83	1791	1337.83	1388.17	1111.5	1061.92	1330.08	1581.83	844.17	806.5		1124.75	886.92	1231.75	798.83	829.5	1207.75	804.17	846.25	1073.17	886.5	716.08	1102.17	191.917	64.6098			612			1676.5	1204.58				1454.75	1438.83	1443.66	632.585	94.1277			612	1102.92	950.83	989.83
	613	1168.92		1462.58	1816.67	1331.67	1384.92	1114.5	1047.5	1293.83	1579.17	847	796.58		1114.67	906.17	1211.75	793.75	835.67	1204.5	806.25	841.42	1080.75	885.08	723.75	1102.14	191.891	64.601			613			1667.67	1208.5				1450.92	1439.5	1441.65	630.567	93.8275			613	1123.5	956.67	999.75
	614	1163.17		1455.92	1799.25	1341.42	1392.75	1135.25	1050.42	1295	1581.92	844.92	805.58		1116.67	919.92	1215	795	823.5	1200.58	876.58	838	1084.5	877.75	720.42	1106.07	195.819	65.9235			614			1661	1213.67				1451.17	1417.58	1435.86	624.775	92.9656			614	1095.67	946.83	991.5
	615	1158.58		1461.08	1805.67	1337.42	1397.42	1158.58	1037.17	1300.58	1590.42	848.42	799.83		1115.5	893	1212.67	787	827	1197.08	881.5	863.75	1084.75	886.33	722	1107.53	197.284	66.4167			615			1636.83	1212.08				1455.5	1436.67	1435.27	624.19	92.8785			615	1099.25	935.33	990.08
	616	1142		1457.58	1810.25	1326.42	1381.42	1162.5	1038.67	1300.08	1581	846.83	819.08		1119.58	883.92	1217.58	781.17	821.17	1198.25	867.08	843.75	1066.92	867.17	719.58	1102.36	192.114	64.676			616			1642.17	1206.58				1443.08	1438.5	1432.58	621.502	92.4786			616	1092.92	919.42	983.92
	617	1154.5		1481.17	1786.5	1319.83	1368.42	1144.67	1029.25	1299.5	1585.42	855.75	825.33		1119.5	896.58	1220.83	792.42	828.33	1189.5	882.17	843.17	1089.08	889.17	731.83	1106.04	195.792	65.9143			617			1618.5	1212.17				1444.33	1431.33	1426.58	615.502	91.5858			617	1103.83	924.67	996.08
	618	1143.17		1438.42	1773.75	1317.42	1372.5	1148.83	1038.33	1302.25	1583.08	854.08	794.17		1121.83	898.83	1223.67	801.42	817.92	1185.5	886.92	910.83	1072.25	867.67	726.75	1103.62	193.368	65.0982			618			1644.08	1192.5				1444	1423.25	1425.96	614.877	91.4928			618	1114.08	931.83	990.08
	619	1149.75		1449.75	1773	1313.42	1376.42	1159.67	1034.5	1290.75	1606.25	850.5	804.25		1115.33	906.42	1233.33	804.42	824.83	1185.17	872.58	838.58	1071.83	864.42	729.75	1102.5	192.246	64.7207			619			1620.83	1187.25				1440.83	1430.42	1419.83	608.752	90.5814			619	1105.08	931.67	976.33
	620	1147		1429.58	1784.42	1319.67	1371.58	1149.75	1028.75	1361.5	1606.33	856.42	812.58		1133.67	893.08	1225.58	776.25	830.75	1180.33	866.42	842.5	1079.33	864	722.67	1103.73	193.485	65.1375			620			1635.83	1179.5				1436.17	1429.33	1420.21	609.127	90.6372			620	1130.75	929	983.42
	621	1136.75		1437.58	1771.25	1301.08	1362.92	1164	1034.75	1295.25	1621.17	869.92	804.08		1110.83	894.42	1238.75	789.42	827.92	1185.5	873.5	862.5	1076.33	858.5	723.08	1101.8	191.545	64.4847			621			1652.25	1193.42				1427.83	1440.92	1428.61	617.525	91.8868			621	1145.33	928.17	986.42
	622	1131.67		1435.33	1761.5	1296.92	1367.42	1162.25	1024.08	1288.83	1620.33	860.92	804.5		1098.17	891.75	1232.83	794.75	826	1183.17	882	861.17	1074.5	874.67	725.5	1099.92	189.671	63.8537			622			1630.33	1186.67				1438.17	1434.58	1422.44	611.357	90.969			622	1152.67	919.42	982.25
	623	1155.58		1428.17	1789.58	1290	1363.08	1162	1027.92	1298.67	1622.42	876	809.33		1112	897.92	1255.75	796.58	828.08	1178.58	864.5	866.17	1083.17	874.25	722.08	1104.63	194.379	65.4385			623			1623.67	1179				1414.75	1404.25	1405.42	594.337	88.4365			623	1166.92	926.25	988.17
	624	1131.58		1428.5	1752.25	1313.08	1349.17	1173.67	1032.83	1282.58	1616.92	865.33	896.83		1118.83	890.75	1250.42	787.67	831.25	1187.5	857.08	854.33	1075.42	857.08	728.33	1103.7	193.45	65.1259			624			1604.17	1182.08				1421.75	1392.42	1400.11	589.025	87.646			624	1169.67	926.5	978.58
	625	1136.58		1427.83	1780.67	1297.58	1346.67	1164.17	1026.67	1281.33	1629.42	857.17	809		1110.75	910.33	1239.08	782.08	821.08	1183.92	860.83	870.42	1074.08	856.33	731.58	1099.89	189.64	63.8431			625			1618.25	1172.67				1421.5	1411.42	1405.96	594.88	88.5172			625	1160.5	924.5	983.42
	626	1138.17		1435.33	1747.58	1303.42	1351.33	1170.25	1041.08	1277.75	1638.67	874.17	811.75		1127.5	896.17	1254.67	767.33	832.5	1167.25	853.92	858.33	1075.67	870.42	705	1099.92	189.671	63.8537			626			1607.17	1192.67				1412.33	1401.83	1403.5	592.42	88.1512			626	1163.42	916.33	981
	627	1142.92		1430.17	1787.92	1300	1355.33	1170.75	1031.42	1286.33	1659.92	864.25	812.5		1091.75	898.5	1239.75	776.67	816.75	1171.42	868.42	844.67	1082	867.67	716.5	1100.71	190.46	64.1192			627			1591.5	1206.33				1393	1392.92	1395.94	584.857	87.0259			627	1168.17	931.58	984.58
	628	1129.25		1426.17	1761.08	1292.75	1364.42	1168	1057	1264.75	1654.75	868.92	811.33		1111.25	899.5	1271.67	770.92	824	1185.42	841.5	834.92	1066.33	870.17	--	1117.81	207.564	69.8776			628			1582.08	1185				1409.42	1382.67	1389.79	578.712	86.1115			628	1177.08	912	966.08
	629	1119.17		1429.42	1786.5	1284.83	1349.75	1163.08	1016.58	1270.92	1652.75	870.5	809.5		1115.42	888.92	1262.75	770	820.33	1182.5	854.25	853.42	1078.67	861.42	--	1116.22	205.973	69.3418			629			1584.42	1180.33				1401.08	1397.25	1390.77	579.69	86.257			629	1167.33	922.5	993.17
	630	1143.83		1422.17	1756.08	1287.5	1343.75	1174.33	1023.67	1274.92	1644.83	876.33	807.75		1112.17	890.08	1267	784	847.58	1171.42	856.58	841.25	1070.75	858.67	--	1116.89	206.639	69.5659			630			1581.58	1182.17				1396.17	1388	1386.98	575.9	85.693			630	1180.33	918.33	966.5
	631	1128.42		1432.5	1758.17	1301.42	1330.33	1178.42	1022.08	1261.92	1652.33	869.25	805.58		1109	904.92	1264.33	778.33	838.58	1153	848.42	828.58	1070.83	859.17	--	1114.08	203.825	68.6188			631			1584	1183.08				1405.5	1378.25	1387.71	576.627	85.8013			631	1188.83	908.5	966.5
	632	1120.25		1416.08	1759.17	1278.08	1336.83	1196.75	1009.67	1275.5	1648.75	871.58	800.67		1089.92	902.25	1260.33	785	824.5	1159.67	842.25	842.42	1153.75	863.25	--	1116.03	205.782	69.2775			632			1578.75	1182.33				1388.83	1388.5	1384.6	573.522	85.3393			632	1181.75	901.92	981.58
	633	1121.5		1421.75	1744.58	1275.33	1345.83	1188.75	1012.08	1264.17	1649.33	882.58	796.25		1104.25	899.42	1264.58	774.67	813.58	1215	836.83	841.83	1061	844.42	--	1112.27	202.023	68.012			633			1578.67	1184.5				1400.17	1394.5	1389.46	578.38	86.062			633	1180.25	905.33	981.33
	634	1104.33		1410.5	1740.08	1300.08	1334.92	1183.08	1001.67	1247.83	1656.17	896.83	805.33		1102.58	899.25	1266.75	775.42	820.75	1172.08	845.33	863.58	1076.75	849.17		1112.02	201.773	67.9278			634			1556.92	1189.83				1395.67	1379	1380.36	569.275	84.7072			634	1200.58	918.5	980.33
	635	1122.08		1421.17	1732.42	1286.25	1340.92	1187.08	1020.17	1263.83	1661.58	878.5	804.33		1115.5	902.5	1277.33	772.08	819.17	1146.58	836.58	849.67	1064.08	864.17		1112.67	202.416	68.1444			635			1566.5	1204.25				1390.17	1384.42	1386.34	575.255	85.5971			635	1175.83	908.17	975.08
	636	1100.25		1402.67	1729.75	1273.75	1325.92	1174.92	1019.5	1252.92	1642.83	880	805.33		1112.33	1047.83	1260.17	779	813.5	1166.83	852.83	842.25	1073.75	854		1114.78	204.528	68.8552			636			1563.92	1194.17				1375.33	1369.67	1375.77	564.692	84.0254			636	1176.42	910.17	967.08
	637	1105.75		1436	1700.67	1264.83	1341.75	1177.33	1017.67	1244	1673.42	864.83	808.92		1098.17	888.33	1283.33	773.83	832.92	1143.33	841.5	839.83	1066.92	851.75		1107.38	197.135	66.3664			637			1556.75	1204.75				1408.42	1385.5	1388.86	577.775	85.972			637	1172.42	1016.17	964.92
	638	1109.92		1413.25	1711.75	1262.25	1331.33	1171.75	1011.5	1260.08	1657.5	874.75	803.17		1108.75	897.67	1280.58	794	811.75	1159.67	831.25	835.25	1058.17	856.33		1106.7	196.449	66.1354			638			1561.83	1218.83				1393.42	1362.5	1384.14	573.065	85.2712			638	1168.83	908.42	967.75
	639	1112.75		1396.33	1689.17	1255.83	1326.58	1194.58	1010	1264.67	1674.08	881.58	803.92		1107.42	895.5	1296.17	777.5	829.17	1146.5	841.33	827.67	1068.5	844.17		1106.83	196.58	66.1795			639			1558.08	1219.75				1390.33	1358.83	1381.75	570.667	84.9144			639	1145.58	904.58	961.33
	640	1104.92		1397.42	1730.17	1272.67	1341.08	1183.92	1009.08	1259.33	1671.5	889.33	803.17		1109.25	887.67	1302.67	784.08	808.08	1147.83	812.67	842.42	1049.25	858.25		1107.85	197.596	66.5216			640			1541.08	1220.5				1387.5	1360.92	1377.5	566.42	84.2824			640	1163.42	897.75	971.58
	641	1106		1398.25	1669	1255.75	1309.08	1194.75	1008.83	1290.67	1677.08	890.42	800.25		1111.25	892.5	1308.08	800.5	816.5	1157.92	820.5	832	1062.17	857.42		1107.57	197.318	66.428			641			1535.58	1203.75				1372.25	1373.33	1371.23	560.147	83.3491			641	1144.17	892.42	971
	642	1103.58		1401.58	1707.42	1263.08	1309.25	1194.17	1003.08	1259.67	1681.33	879.67	811		1084.25	892.67	1298.83	794.33	820.67	1144.67	825.67	831.33	1020.17	858.33		1104.04	193.786	65.2389			642			1539.83	1194.58				1383.67	1369.42	1371.88	560.795	83.4454			642	1145.33	876.25	959
	643	1103.58		1397.75	1678.08	1271	1335.17	1213.5	1005.67	1228.08	1675.92	891.58	816		1100.5	893.75	1316.17	785.75	817.42	1144.17	825.92	828.5	999.75	861.58		1104.28	194.028	65.3205			643			1534.33	1196.08				1353.75	1364.5	1362.16	551.085	82.0006			643	1179	904.17	970.92
	644	1094.25		1391.17	1711.67	1266.25	1324.25	1204	1004.42	1244.17	1690.08	894.42	798.92		1104	895.42	1286.5	804.25	803.42	1135.83	816.75	832	1106	860.92		1108.03	197.783	66.5846			644			1554	1211.08				1366.92	1354.33	1371.58	560.502	83.4019			644	1123.42	910	960.17
	645	1095.17		1381.83	1698.42	1237.5	1322.08	1212.92	990.42	1245	1701.92	905.17	803.92		1099.75	889.42	1307	791.08	825.25	1143.92	827.83	821.42	1134.08	852.67		1108.89	198.644	66.8744			645			1532	1209.5				1382.58	1363.42	1371.88	560.795	83.4454			645	1113.33	915.58	963.58
	646	1095.67		1391.83	1694.33	1260.92	1329.92	1203.5	1010.08	1248.17	1682.67	882.5	808		1099.33	890.92	1294.25	783.75	820.25	1174.5	821.42	831.42	1101.75	854.42		1108.55	198.302	66.7595			646			1520.92	1200.33				1373.92	1361.67	1364.21	553.13	82.3049			646	1119	917.25	959.5
	647	1108.17		1384.58	1673.67	1256.92	1319	1195.67	992.92	1240.58	1672.08	902.92	801.33		1107.33	890.5	1299.75	787.92	809	1159.08	819.92	840.25	1116.08	860.5		1106.58	196.33	66.0953			647			1519.25	1209.25				1365.42	1370.17	1366.02	554.942	82.5746			647	1127	910.33	955.67
	648	1089.42		1372.42	1733.5	1254.5	1308.42	1212.83	997.83	1234.83	1669.25	905.42	810		1088.42	891.08	1316.83	800	810.25	1164.17	823.25	824	1118.08	845.67		1108.1	197.853	66.6083			648			1522.5	1205.08				1378.08	1360.92	1366.64	555.565	82.6672			648	1109.5	917.83	948.25
	649	1075.5		1378.83	1683.75	1237.42	1322.75	1207.67	991.08	1229.75	1673.67	915.08	805.08		1099.08	905.42	1309.25	788.67	811.67	1149.92	842.75	825.75	1126.92	839.42		1105.69	195.437	65.7949			649			1508.92	1210.08				1380.5	1369.58	1367.27	556.19	82.7602			649	1118.67	913.25	966.42
	650	1097.75		1372.33	1708.08	1248.42	1304.75	1207.75	996.25	1224.33	1674.92	905.25	811.75		1096.67	888.08	1290.25	797.33	820.75	1148.67	843.67	823.08	1123.75	835.17		1105.67	195.417	65.788			650			1513.17	1202.33				1364.08	1352.5	1358.02	546.94	81.3838			650	1113.58	904.08	966.83
	651	1083.75		1382.92	1660.75	1244.83	1297.33	1216.92	984.08	1225	1676.42	912.92	804		1088.17	902.67	1301.08	773.75		1166.83	855.17	825.92	1128.5	842.67		1118.68	208.434	70.1703			651			1518.67	1201.92				1380.08	1351.92	1363.15	552.067	82.1468			651	1098.67	908.92	958.75
	652	1078		1382.83	1684.25	1234.08	1308.5	1214.58	978.58	1242.17	1679.67	917.17	801.92		1090.58	888	1298.17	790.25		1159.25	842.33	814.92	1110.83	852.42		1118.42	208.175	70.0832			652			1514	1208.67				1372	1350.83	1361.38	550.295	81.883			652	1093.92	950.83	957.33
	653	1078.75		1374.17	1654	1249.17	1299.83	1214.42	997.25	1231.42	1672.75	912.92	804.42		1077	906.75	1542	794.83		1164.92	853.58	807.08	1115.42	843.75		1129.72	219.472	73.8862			653			1520.42	1198.08				1357.75	1351.5	1356.94	545.857	81.2228			653	1094.25	904.08	963.25
	654	1093.58		1351.33	1664.5	1224.58	1292.67	1232.75	989.58	1228.58	1659.83	916.42	801.83		1095	891.33	1280.92	805.75		1141.75	855.75	794.42	1104.67	846.08		1113.57	203.316	68.4473			654			1505.5	1208.83				1362.33	1349.92	1356.64	545.565	81.1792			654	1093.83	907.5	945.25
	655	1083.58		1360	1657.08	1245.5	1298.58	1206.58	984.25	1222.42	1665.83	919.33	810.83		1083.67	904	1289.17	804.75		1156.33	848.17	800.08	1104.83	842		1114.35	204.099	68.7109			655			1483.83	1204.33				1351.83	1357.08	1349.27	538.187	80.0815			655	1093.5	908.17	953.92
	656	1074.17		--	1695.92	1228.17	1267.83	1220.17	984.67	1222.17	1640.42	918.5	800.92		1081.5	897.83	1282.67	822.42		1142.33	842.33	810.67	1101.42	834.33		1098.34	188.089	63.3211			656			1483.75	1196.83				1354.58	1333.67	1342.21	531.127	79.031			656	1069.17	919.5	946.75
	657	1086.08		--	1642.83	1235.25	1288.17	1205.17	993.42	1217.83	1659.58	911.75	805		1081.08	894.58	1287	824.58		1140.42	844.75	811.67	1105.67	842.42		1098.8	188.553	63.4772			657			1498.25	1177.58				1370.17	1350.42	1349.11	538.025	80.0573			657	1066.08	900.58	943.25
	658	1075.08		--	1659.83	1225.75	1294.58	1213.67	985.83	1209.92	1637.83	922	788.5		1096.75	891.83	1292	822.08		1142.67	847.33	800.83	1117.67	845.5		1098.4	188.153	63.3425			658			1470.42	1185.92				1369.42	1324.58	1337.59	526.505	78.3431			658	1078.42	898.58	943.33
	659	1080.83		--	1635.75	1233.92	1275.83	1222	989.42	1209.58	1675.33	905.25	794		1081.42	903.33	708.25	824.92		1131	839.33	814.42	1102.25	831.75		1066.24	155.991	52.5152			659			1473.08	1189.67				1374.58	1331.08	1342.1	531.022	79.0153			659	1064.5	895.42	934.5
	660	1065.5		--	1667.92	1231.33	1270.92	1154.25	987.75	1218.58	1661.5	912.08	804.33		1085.42	879.5	1286.92	810.08		1130.58	851.58	800.92	1110.33	833.83		1092.81	182.556	61.4585			660			1462.75	1181.42				1385.67	1323	1338.21	527.13	78.4361			660	1066.08	910.5	945.67
	661	1066.75			1651.75	1222.33	1288.42	1138	978.42	1216.08	1643.5	925.25	805.42		1098.67	893.25	1279.25	836.25		1129.58	839	799.58	1093.08	834.5		1091.53	181.281	61.029			661			1474.67	1184.75				1390.08	1307.5	1339.25	528.17	78.5909			661	1053.17	913.75	941.92
	662	1063.92			1680.5	1221.08	1266	1153.83	985.25	1215.92	1661.92	917.83	795.33		1092.25	911.5	1261.5	818.92		1137.33	837.25	806.83	1096.33	838.08		1092.71	182.464	61.4275			662			1457.17	1174.08				1394.25	1329.67	1338.79	527.712	78.5228			662	1029.58	892.08	948.5
	663	1063.08			1622.08	1233.42	1266.25	1155.42	977.75	1219	1671.17	916.5	806.33		1087.75	896.33	1292.83	824.83		1129.25	848	804.42	1099.83	845.92		1092.64	182.39	61.4025			663			1468.75	1157.92				1377.75	1312.58	1329.25	518.17	77.1029			663	1041.75	899.67	953
	664	1066.42			1658.67	1219.17	1272.33	1141.17	981.42	1204.33	1659.83	917.42	811.25		1088.92	897.25	1283.75	825.67		1133.33	847	802.17	1103.75	831.58		1091.86	181.615	61.1415			664			1470.58	1143.17				1364.83	1318.25	1324.21	513.127	76.3526			664	1041.17	903.92	948.33
	665	1072.17			1621.83	1223.92	1251	1171	979.58	1216.92	1673.17	922.08	797.17		1097.67	896.58	1265.5	826.42		1121.5	840.92	817.08	1099.58	833.08		1090.9	180.654	60.818			665			1463.33	1147.25				1374.08	1327.33	1328	516.917	76.9165			665	1046.08	890.67	936.17
	666	1072			1650	1223	1263.58	1159	971.92	1190.58	1647.08	907.58	796.67		1081.92	893	1282.67	825.25		1119.92	849.67	821.92	1096	836		1088.83	178.579	60.1197			666			1453.75	1143.5				1364.08	1332	1323.33	512.252	76.2224			666	1043.58	900.58	931.75
	667	1056.83			1621.58	1216	1282.75	1173.42	966.67	1209.92	1658.08	920.25	800.67		1093.83	887.58	1275.25	831.92		1132.58	844.08	801.92	1099.42	830.17		1089.63	179.377	60.3883			667			1467	1131.92				1359.67	1313.33	1317.98	506.9	75.4259			667	1018.42	908.08	941.67
	668	1044			1638	1227.08	1257.08	1147.5	959.25	1208.75	1641.08	913.83	802.67		1083.08	891.33	1269.08	843.75		1126.75	844.08	800.25	1101.17	828.67		1085.65	175.403	59.0502			668			1454.75	1158				1394.25	1317.58	1331.14	520.065	77.3849			668	1025.83	900	1022.83
	669	1059.5			1608.92	1215.92	1264.75	1152.75	985.25	1203.25	1658.75	903.67	802.58		1078.58	890.75	1257.25	831.5		1131.42	851.5	799.25	1108	831.92		1086.08	175.829	59.1939			669			1451.5	1160.58				1379.58	1314	1326.41	515.335	76.6811			669	1018.75	905.75	967.42
	670	1052.5			1642.67	1224.67	1242	1150.75	969.75	1205.67	1626.08	918.08	802.83		1079.83	894.92	1258.83	846.83		1121	847.75	776.08	1089.17	840.83		1083.7	173.447	58.3917			670			1464.42	1150				1374.42	1309.83	1324.67	513.587	76.421			670	1072.5	899.33	973.92
	671	1046.25			1622.42	1205.25	1258.42	1158.17	964.92	1192.25	1634.08	894.75	798.33		1080.58	886.5	1270.33	833.08		1130.92	833.25	768.83	1091.17	816.92		1078.23	167.983	56.5522			671			1452.25	1160.33				1361.5	1300.5	1318.64	507.565	75.5249			671	1030.25	893.67	954.83
	672	1064.67			1611.5	1206.67	1249.5	1336.92	967.83	1197.08	1656.25	905.42	805.75		1081.67	898.5	1267.58	833		1128.75	833.75	803.58	1086.25	822.25		1092.47	182.219	61.3451			672			1442.33	1159.42				1373.08	1306.17	1320.25	509.17	75.7637			672	1031.58	901.5	959.83
	673	1057.42			1624.83	1209.75	1237.75	1150.08	965.08	1188.5	1630.08	900.42	795.25		1080.92	877.92	1272.92	846.5		1120.08	849.58	806	1108.83	833.33		1081.85	171.605	57.7716			673			1438.5	1157				1358.75	1292.25	1311.62	500.545	74.4803			673	1037.42	900.17	948.33
	674	1053.25			1628.83	1213.67	1226.33	1199.25	966.25	1189.67	1642.33	910.67	791.75		1086.67	893.17	1261.08	837.75		1117.17	839.17	804.83	1084	819.33		1082.38	172.127	57.9475			674			1442.67	1158				1363.58	1305.17	1317.36	506.275	75.3329			674	1037.17	886.5	957.92
	675	1051.75			1586.5	1213.33	1240.17	1211.92	957.92	1197.33	1637.67	899.83	803.5		1065.92	891.08	1263	835.08		1102.25	835.67	807.67	1112.33	817.33		1080.54	170.289	57.3288			675			1426.17	1160				1375.33	1298.08	1314.89	503.815	74.9669			675	1036.67	901.58	962.5
	676	1050.25			1647.42	1214.08	1228.58	1206.67	963.5	1204.42	1636.42	905.5	796.58		1084.42	882.5	1261.25	829.67		1117.17	831.08	812.58	1082	822.92		1083	172.751	58.1573			676			1412.75	1166.33				1381.33	1278	1309.6	498.522	74.1794			676	1027.33	893.5	949.75
	677	1042.83			1604.33	1203.5	1233.42	1192.83	958.33	1189.75	1641.58	897	795.25		1073.5	890.58	1264.58	827.25		1108.58	830.33	808.08	1090.92	818.58		1077.43	167.183	56.2829			677			1429.58	1174.17				1381.83	1295.5	1320.27	509.19	75.7667			677	1041.83	895.33	955.58
	678	1060.92			1607.42	1215.08	1233.67	1218.08	969.08	1191.42	1631.25	901.83	806.33		1086.92	899.33	1244.42	841.75		1106.58	830.08	794.83	1097.08	806.25		1081.17	170.925	57.5427			678			1412.5	1169.25				1391.5	1277	1312.56	501.482	74.6198			678	1052.83	892.58	957.25
	679	1036			1611.83	1199	1239.17	1215	957.58	1189.67	1621.83	898.25	800.08		1062.75	882.58	1264	834.5		1109.92	829.25	793.58	1078.08	819.58		1075.93	165.679	55.7766			679			1411.5	1148.75				1380.33	1291.08	1307.91	496.835	73.9283			679	1055	882.17	950.17
	680	1039.33			1580.5	1208	1227.5	1203	963.33	1176.75	1620.92	904	806.75		1070.58	889.17	1243.5	843.92		1120	856.08	804.25	1083.5	820.08		1076.9	166.653	56.1046			680			1421.58	1161.17				1373.58	1301.33	1314.41	503.335	74.8955			680	1054.83	900.42	944.5
	681	1036.5			1617.33	1219.58	1233.75	1213.58	960.5	1158.5	1539.67	908.08	796.75		1068.58	913	1260.42	847.67		1119.67	845.75	798.58	1094.42	817.42		1076.3	166.053	55.9024			681			1414.25	1168.5				1384.75	1288.92	1314.11	503.025	74.8493			681	1072.33	897.42	958.75
	682	1043.17			1572.83	1214.25	1224	1213.17	965.92	1191.67	1599.5	906.25	793.92		1055.83	883.75	1242.83	821.5		1110.17	842.42	806.33	1084.5	823.5		1073.45	163.198	54.9414			682			1414.5	1163.83				1410.67	1290	1319.75	508.67	75.6893			682	1080.58	883.75	942.33
	683	1045.08			1591.42	1201.75	1220.83	1211.58	965.83	1179.5	1589.58	901.58	793.75		1071.5	874.67	1243.17	833.5		1111.58	826.58	815.67	1065.75	821.58		1071.84	161.587	54.399			683			1397.75	1184.5				1393.83	1284.92	1315.25	504.17	75.0197			683	1064.42	889.67	951.67
	684	1026.33			1557.08	1207.5	1231.17	1212.5	954.83	1174.92	1583.67	910.08	792.92		1064.17	853.5	1259.33	835.42		1106.75	853.67	766.58	1067.83	816.42		1067.09	156.838	52.8003			684			1391	1178.42				1395.25	1263	1306.92	495.837	73.7799			684	1056.75	879.67	955.75
	685	1034.92			1584.92	1203	1215.83	1213.67	954.17	1178.5	1585.67	902.75	805.5		1058.25	840	1272.25	839.5		1104	821.17	736.5	1083.58	815.92		1065.79	155.545	52.3649			685			1425.67	1178.08				1402.25	1286.75	1323.19	512.107	76.2008			685	1059.25	883.83	962.08
	686	1035.83			1552	1197.08	1215.5	1230.08	960.25	1175.17	1595	896.25	800.58		1061.33	845.25	1236.42	839.67		1106.75	826	815.75	1104	824		1069.31	159.061	53.5487			686			1390.17	1164.67				1381.75	1266.92	1300.88	489.798	72.8811			686	1075.17	888.92	958.67
	687	1047.08			1568.08	1180.67	1222.42	1226.58	944.33	1175.75	1594.5	898.75	797.33		1070.17	853.08	1259.67	839.92		1104.08	826.33	989.67	1075.75	822.5		1078.77	168.522	56.7336			687			1387.67	1177.5				1385.33	1268.33	1304.71	493.627	73.451			687	1077.17	894.58	947.5
	688	1025			1547	1203.25	1222.17	1227	962.08	1183.42	1592.42	898.42	799.42		1078	843.25	1236.83	845.92		1103.33	837.42	819.92	1073.67	813.92		1069.08	158.826	53.4695			688			1383.92	1159.67				1394.17	1261.67	1299.86	488.778	72.7293			688	1062.17	885.58	952
	689	1035.08			1568.33	1200.25	1207.92	1228.5	943.92	1171.83	1578.08	891	800.83		1064.58	838.42	1249.25	843.25		1098.83	824.92	835.08	1069.83	822.42		1066.96	156.714	52.7586			689			1398.75	1172.58				1365.25	1279	1303.89	492.815	73.3301			689	1065.83	887.5	942.58
	690	1027.83			1556.67	1186.08	1207.92	1226.17	951.67	1175.33	1598.33	905.33	797.17		1068	844.92	1263.58	839.58		1104.17	834.92	829.33	1076.25	809.83		1068.58	158.333	53.3036			690			1402.17	1155.25				1366.67	1271.33	1298.86	487.775	72.5802			690	1068.25	888.17	946.33
	691	1032.83			1561.83	1184.92	1205.25	1239.67	929.58	1178.33	1583.75	889.75	795.25		1064.08	846.75	1239.25	845.58		1106.33	845.75	825.67	1079.83	810.75		1066.59	156.337	52.6316			691			1391.75	1152.92				1380.75	1268.33	1298.44	487.357	72.518			691	1075.92	881.33	962.67
	692	1017.42			1564.67	1194.75	1205.33	1246.58	948.75	1164.33	1561.25	893.75	758.92		1067.25	854.75	1223.17	837.42		1086	836.42	826.17	1067.42	822.5		1061.94	151.689	51.067			692			1386.08	1154.5				1378.25	1258.75	1294.39	483.315	71.9165			692	1076.67	879.25	961.58
	693	1026.5			1573.42	1190.67	1207.08	1260	941.83	1170.58	1584.5	891.33	754.83		1066	845.83	1241.67	831.75		1091.5	833.5	814.58	1075.75	812.17		1063.87	153.618	51.7162			693			1378.42	1161.33				1364.25	1260.67	1291.17	480.087	71.4363			693	1068.25	895.58	966.08
	694	1022.58			1560	1179.58	1205.42	1260.08	941	1160.17	1572.25	898.42	758.83		1061.25	841	1247	825		1099.33	832.75	813.33	1065.58	823.25		1061.41	151.162	50.8893			694			1381.92	1143.83				1353.08	1263.83	1285.66	474.585	70.6175			694	1056.5	891.42	952.83
	695	1006.67			1573.33	1184.08	1205.83	1263.17	944.5	1161.33	1594	884.58	754.83		1059.67	851.83	1229.75	826.08		1101.58	833.58	821.5	1074.67	830.5		1063.24	152.986	51.5034			695			1404.5	1113				1354.5	1255.58	1281.89	470.815	70.0565			695	1080.92	876.83	946.08
	696	1027.92			1550.67	1175.67	1184.33	1268.58	940.5	1170.75	1571.67	895.75	750.42		1069.25	840.08	1240.67	833.17		1104.92	827.5	823.92	1079	815.5		1061.59	151.343	50.9504			696			1396.42	1124.17				1359.58	1257	1284.29	473.212	70.4133			696	1066.58	870.92	951.67
	697	1030.17			1549.17	1185.67	1179.17	1295.58	944.92	1163.33	1554.25	889.67	764.75		1058.83	845.75	1229.92	824.75		1104	842.67	831.08	1068.25	805.5		1061.44	151.194	50.9001			697			1382.92	1125.92				1352	1254.17	1278.75	467.673	69.5889			697	1065.92	882.58	954.33
	698	1025.92			1541.25	1191.5	1189.25	1288.83	937.5	1161	1582.5	894.83	756.33		1068	843.58	1235.58	834.33		1088.42	822.42	826.08	1075.75	806.5		1061.56	151.306	50.938			698			1373.58	1127.67				1359.33	1262.33	1280.73	469.647	69.8828			698	1075.92	865.25	951.08
	699	1019.25			1557.58	1173.33	1202.67	1306.33	934.92	1176.75	1566	926.42	766.25		1049	840.67	1246.75	821.17		1086.42	827.75	814.58	1089.08	803.5		1063.6	153.351	51.6264			699			1381	1131.17				1370	1268.33	1287.62	476.545	70.9092			699	1064.08	863.25	962.75
	700	1009.58			1506.58	1170.25	1190.5	1322.75	936.92	1151.83	1575.58	894.5	765.33		1058.58	842.5	1250.92	825.58		1096.58	827	813.83	1060	805.17		1058.1	147.854	49.7759			700			1369.67	1135.17				1349.5	1253.58	1276.98	465.9	69.3252			700	1054.5	876.67	945.67
	701	1005.58			1548.83	1182.42	1204	1343.25	929.5	1167.08	1549.67	904.58	774.33		1064.75	863.58	1239.83	822.42		1080.25	825.17	820.58	1072.08	803.67		1063.24	152.991	51.505			701			1384.42	1114.75				1367.33	1251.75	1279.56	468.482	69.7095			701	1073.42	875.08	942.75
	702	999.67			1514.5	1171.67	1179.5	1344.25	932.17	1158.25	1553.17	902.58	769.17		1040.42	836	1242.83	823.75		1085.33	831.58	820.42	1057.83	804.33		1056.18	145.93	49.1281			702			1368.08	1109.67				1384.67	1245.5	1276.98	465.9	69.3252			702	1087	871.42	943.33
	703	1005.67			1535.08	1181.42	1185.5	1375.33	949.17	1150.42	1544.92	898.25	778.67		1045.17	835.58	1247.75	828.75		1092.25	822.92	818.17	1063.42	812.33		1061.62	151.369	50.9593			703			1371.67	1135				1372.58	1240.33	1279.89	468.815	69.7589			703	1086.42	869.83	947.58
	704	1007.25			1518.33	1168.33	1176.25	1371.58	915.58	1130.42	1566.67	903	774.75		1044.5	838	1254.25	829.83		1091.25	825.08	824.17	1052	809.67		1057.94	147.693	49.7215			704			1368.08	1113.58				1358.42	1245.25	1271.33	460.252	68.4849			704	1092.83	871.92	947
	705	1004.25			1534	1170.25	1187.5	1388.33	922.33	1154.25	1563.33	903.75	779.58		1055.33	838.75	1241.42	799.25		1068	827.08	810.25	1058.42	801.83		1058.31	148.061	49.8453			705			1369.33	1127.83				1350.75	1250.42	1274.58	463.502	68.9685			705	1092.67	875.17	950.92
	706	1013.67			1509.5	1162.5	1177	1387.25	935.42	1156.33	1546.5	916.42	783.67		1053.25	843.58	1250.17	823.75		1039.08	824.42	822.08	1053.33	808.5		1058.23	147.983	49.8191			706			1359.17	1123.67				1361.75	1237	1270.4	459.317	68.3457			706	1092	862.75	943.58
	707	1006.42			1514.75	1172.17	1193.67	1412.08	946.33	1151.58	1566.92	916.25	775.67		1035.58	845.92	1256.83	818.5		1010.92	841.92	821.17	1045.08	806.17		1059.89	149.641	50.3774			707			1357.83	1120.67				1368.08	1245.75	1273.08	462.002	68.7453			707	1097.58	858.75	938.25
	708	1003.75			1528.25	1173.67	1180	1403.17	936.25	1152.67	1565.5	896.08	767.17		1047.67	837.75	1235.25	820.5		1019.08	831.58	810.5	1057	811.83		1056.72	146.469	49.3097			708			1362.08	1120.58				1364.58	1243.67	1272.73	461.647	68.6924			708	1099	878.33	926.25
	709	1011.92			1528.33	1170.17	1188.42	1416.33	923.42	--	1549.17	889.25	768.17		1038.75	837.42	1258.92	821.92		1012.58	835.75	813.42	1060.17	802.5		1051.48	141.228	47.5452			709			1346.33	1116				1386.5	1238	1271.71	460.627	68.5407			709	1087.58	866.08	942.5
	710	994.42			1529.17	1159	1175.08	1445.33	924.17	--	1521.75	895.83	778.17		1038	832.58	1248.58	809.33		1007.17	823.42	811.17	1050.33	813.58		1047.62	137.366	46.2448			710			1360.58	1119.67				1366.42	1221.17	1266.96	455.88	67.8342			710	1143.25	864.75	940.75
	711	998.08			1539.25	1158.08	1176.58	1424.83	924.25	--	1561.83	902.42	770.25		1048.5	847.25	1241.92	809.17		995.08	826.83	810.33	1056.08	801.58		1049.57	139.323	46.9037			711			1337.67	1127.42				1364.08	1231.83	1265.25	454.17	67.5798			711	1089.83	862.83	945
	712	999.75			1514.67	1148.83	1182.17	1446.42	914.92	--	1544.75	883.33	774.92		1048.92	843.92	1260.92	803.08		1014.5	826.58	821.08	1051.92	824.92		1050.31	140.061	47.1523			712			1340.25	1124.5				1357.08	1227.83	1262.41	451.335	67.1579			712	1076.75	874.83	949.83
	713	997.42			1513.5	1140.58	1186.33	1454.75	934.75		1543.42	899.67	762.25		1038.33	842.83	1244.5	804		855.58	833.5	807.25	1061.92	798.25		1039.94	129.685	43.6591			713			1362.83	1112.42				1378.42	1222.67	1269.09	458.005	68.1504			713	1069.17	868.25	937.25
	714	983.33			1512.25	1154.67	1176	1468.5	925.5		1539.5	895.67	762.33		1052.75	831.17	1230.33	820.08		599.42	838.92	811.5	1059.83	794.5		1025.35	115.097	38.7481			714			1344.25	1099.58				1353.92	1251.83	1262.39	451.315	67.155			714	1069.75	862.75	939.75
	715	987.92			1513.33	1147.5	1155.42	1476.92	915.75		1519.83	895.58	773		1061.92	838.08	1252	809.67		605.17	825.17	811.08	1046.67	790.17		1023.62	113.371	38.167			715			1333.33	1115				1341.25	1232	1255.39	444.315	66.1134			715	1059.25	870.58	942.25
	716	994.92			1509.83	1155.83	1171.67	1470.67	916.92		1524.67	881.25	773.58		1032.92	852.75	1233.25	830.92		602.83	820.25	805.17	1036.92	809.83		1023.57	113.316	38.1482			716			1346.75	1103.58				1351.58	1241.25	1260.79	449.71	66.9162			716	1100.83	855.5	933.92
	717	994.75			1511	1160.67	1161.67	1468.92	909.42		1526.17	874.33	778.83		1060.5	845.67	1225.92	794.42		604.67	823.33	808.25	1048.58	798.17		1021.96	111.709	37.6075			717			1335.58	1115.5				1355.42	1232	1259.62	448.545	66.7428			717	1058.33	856.42	946.92
	718	992.83			1529.75	1151.08	1164.92	1484.42	919.08		1525.42	878.33	774.33		1030.33	841	1230.25	800.92		604.75	834.5	809	1052.25	805.58		1023.82	113.569	38.2335			718			1328.58	1097.42				1371.25	1226.25	1255.88	444.795	66.1848			718	1066.67	861.5	934.58
	719	983.33			1512.67	1157	1158.08	1500.75	922.08		1530.67	881.75	780.83		1041.83	831.67	1227.83	795.75		1040.83	830	796.42	1054	789.42		1046.38	136.134	45.8302			719			1330.92	1098.33				1357.83	1224.5	1252.89	441.815	65.7414			719	1068.17	852.92	941.83
	720	986.83			1490.83	1150.75	1178.92	1498.58	921.42		1515.83	883.33	778.33		1039.75	845.83	2464.58	809.42		1045.58	828.83	814.17	1032.92	794.67		1115.59	205.337	69.1278			720			1324.92	1080				1372.08	1205.83	1245.71	434.627	64.6719			720	1080.5	865.08	936.75
	721	995.58			1494.92	1145.58	1180.08	1496.33	--		1505.83	880.58	768.67		1041.83	841.75	1237.33	804.25		1046.83	826.75	802.75	1042.83	805.5		1053.96	143.714	48.3821			721			1318	1077.83				1365.5	1225.83	1246.79	435.71	64.833			721	1070.5	858.75	937.5
	722	979.67			1489.25	1144.5	1159.5	1505.25	--		1522.92	893.83	770.58		1029.75	840.5	1239.92	802.67		1062.17	819.42	810.25	1037.33	796.92		1053.2	142.952	48.1254			722			1326	1078.5				1341.83	1232.83	1244.79	433.71	64.5354			722	1065.25	857.25	937.33
	723	986.42			1495	1147	1172.25	1514.83	--		1521.67	880.25	759.75		1039.33	845.42	1234.75	790		1070.17	818.67	800	1029.83	811.92		1053.96	143.706	48.3795			723			1308.17	1079.83				1358.5	1200.5	1236.75	425.67	63.339			723	1067	858.08	941
	724	995.83			1506.5	1155.67	1172.5	1503.58	--		1526	888	767.83		1032.42	842.58	1243.92	797.75		1047.33	819.42	800.25	1046.08	792.5		1055.19	144.936	48.7934			724			1303	1080.92				1343.75	1207	1233.67	422.587	62.8804			724	1058.58	845.92	932.75
	725	979.25			1486.5	1141.67	1164.08	1481.83			1522.5	886.83	761.17		1050.08	836.17	1242.08	802.5		1053.08	834.42	807.58	1036.75	809.42		1052.7	142.451	47.9567			725			1321.25	1054.17				1356.92	1222.83	1238.79	427.712	63.643			725	1079.33	852.17	963.75
	726	983.33			1501.33	1142.75	1159	1529.25			1527.92	895.58	781.33		1028.5	841.17	1251.25	799.5		1060.42	831.83	798.17	1032.67	788.33		1056.02	145.769	49.074			726			1299.33	1067.17				1351.5	1202.5	1230.12	419.045	62.3532			726	1068.92	849.58	948.17
	727	983.42			1466.08	1135.75	1168	1550.92			1507.83	894.92	775		1035.75	848.17	1246.08	796.08		1042.33	823	790.25	1028.42	797		1052.29	142.044	47.8199			727			1316.33	1056.17				1358.58	1210.67	1235.44	424.357	63.1437			727	1071.5	850.33	952.08
	728	983.08			1469.25	1128.17	1151.08	1524.08			1522.08	899.75	778		1027.92	832.25	1243.5	796.42		1057	814.58	804.58	1042.17	792.83		1050.98	140.735	47.379			728			1316.08	1060.75				1355.08	1212.5	1236.1	425.022	63.2427			728	1073.5	850.83	953.67
	729	987.67			1473.92	1142	1154.67	1538.5			1512.08	880	766.92		1031.33	844.25	1232.75	799.25		1045	811.17	798.33	1046.92	792.67		1050.44	140.187	47.1947			729			1304.92	1058				1371.67	1205.33	1234.98	423.9	63.0757			729	1077.75	843.92	947.08
	730	965.08			1483.25	1150	1169.75	1527.83			1520.33	886.33	773.25		1024.08	842.67	1314.92	807.17		1054.67	828.42	798.08	1038	790.67		1057.32	147.074	49.513			730			1314.75	1048.83				1366.67	1189.58	1229.96	418.877	62.3283			730	1076.67	844	951.5
	731	982.75			1460.58	1126.75	1149.83	1530.33			1511.83	895.92	774.17		1035.75	837.58	1255.17	803.92		1031.67	821.25	800.67	1040.08	805.75		1050.82	140.574	47.3248			731			1308.42	1028.58				1379.42	1191.5	1226.98	415.9	61.8853			731	1076.08	850.58	953.42
	732	970.33			1464.25	1122.17	1161.25	1530.42			1510.25	882.25	761.67		1022.5	833.67	1227.08	785.83		1057.58	819.42	799.58	1035.33	802.42		1046.24	135.985	45.7801			732			1306.33	1041.25				1380.17	1192.08	1229.96	418.877	62.3283			732	1066.75	849.67	929.75
	733	971.5			1454.08	1126.17	1142.5	1541.83			1517.25	893.92	771.5		1025.5	852.83	1242.92	807.92		1042.42	830	794	1032.67	784.33		1048.9	138.652	46.678			733			1306.83	1046.17				1393.67	1200.5	1236.79	425.712	63.3454			733	1055.5	838.17	950.75
	734	966.67			1456.08	1132.75	1144	1528.5			1501.17	898.17	766.92		1020.33	845.67	1244.17	802.83		1063.25	816	804.08	1037.08	795.5		1048.42	138.172	46.5162			734			1296.58	1046.17				1385.83	1201.75	1232.58	421.502	62.7189			734	1053.42	841.33	948.08
	735	969.75			1477.83	1137.08	1150.17	1530.67			1499.33	888.5	774.83		1020.83	843.92	1247.25	794.25		966.83	823.92	798.92	1029.17	793.83		1043.95	133.696	45.0094			735			1291.42	1049.42				1380.08	1183.58	1226.12	415.045	61.7581			735	1059.08	850.58	946.83
	736	968.33			1477.42	1133.08	1153.83	1549.5			1504	899.17	771.33		1019.58	836.92	1233.5	802.17		948.58	828.33	804.25	1034.58	790.17		1044.4	134.146	45.1611			736			1292.67	1066.67				1380.33	1188	1231.92	420.837	62.62			736	1041.58	848.83	943.92
	737	964.33			1481.5	1123.58	1150.08	1555.58			1488.83	892.75	781.67		1010	832.92	1221.08	792.25		961.58	820.83	786.42	1035	596.92		1029.14	118.886	40.0237			737			1301.33	1041.42				1390.75	1196.5	1232.5	421.42	62.7066			737	1049.83	842.17	928.58
	738	964.75			1487.17	1120.17	1137.33	1551.33			1508.58	894.67	766.58		1009.17	840.17	1219.42	793		951.42	818.42	792.58	1024.75	804		1040.21	129.956	43.7505			738			1292.08	1042.25				1395.17	1180.67	1227.54	416.462	61.969			738	1054.17	967.5	947.75
	739	973.5			1478.33	1126.67	1147.75	1557.42			1490.33	895.5	777		1027.92	841.58	1238.25	799		957.58	833.67	801.75	1003.08	802.5		1044.23	133.975	45.1035			739			1288.83	1054.58				1399	1176.17	1229.64	418.565	62.2818			739	1040.25	848	933.75
	740	979.5			1488.58	1129.42	1140.58	1551.83			1491.83	880.67	775.42		1024.08	840.83	1220.58	810.67		919	815.67	799.83	1012.33	788.08		1039.35	129.097	43.4612			740			1284.08	1044.08				1413.08	1181.58	1230.7	419.625	62.4396			740	1049.17	838.58	946.5
	741	965.08			1473.83	1131	1138.33	1554.83			1480.83	906.25	770.33		1029.17	844.33	1237.75	796.83		924.08	818.5	803.92	1019.58	788.75		1040.2	129.949	43.7481			741			1273.75	1050.17				1392.42	1194.83	1227.79	416.712	62.0062			741	1044.42	833.25	946.33
	742	958.42			1481.92	1129.25	1145.08	1558.58			1505.08	895.67	766.92		1027.25	839.5	1229.92	794.58		934.58	846.83	795.92	1019.33	786.83		1042.1	131.848	44.3872			742			1290.5	1045.75				1400.75	1194.92	1232.98	421.9	62.7781			742	1037.92	842.17	946.17
	743	960.25			1452.17	1101.67	1134.58	1550.67			1495.33	888.08	767.58		1019.58	828.58	1235.33	795.92		923.17	857	803.17	1023.92	771		1035.76	125.515	42.2552			743			1270.92	1055.92				1401.42	1192.08	1230.09	419.005	62.3473			743	1047.83	845.42	938.67
	744	953.08			1477.58	1104.75	1135.58	1559.33			1478.17	897.58	763.33		1018.75	833.92	1235.42	797.33		922.83	837.83	791.92	1025.75	784.67		1036.34	126.092	42.4496			744			1276.75	1061.17				1411.33	1184.75	1233.5	422.42	62.8554			744	1047.25	837.92	945.58
	745	963.08			1468.17	1129.42	1137.58	1562.42			1479.67	892.83	772.5		1014.17	836.42	1236.42	770.92		918.58	865.17	794.33	1021	780.92		1037.86	127.609	42.9601			745			1294.25	1052.83				1409.83	1159.83	1229.18	418.105	62.2134			745	1029.33	845.08	948
	746	962.67			1479.75	1100.83	1143.58	1540.25			1482.83	891.42	775.33		1012.17	836.67	1240.83	786.17		919.83	853.17	794.25	1017.92	785.25		1036.64	126.392	42.5506			746			1291.83	1057.17				1391.75	1164.25	1226.25	415.17	61.7767			746	1037.25	860	943.25
	747	963.08			1449.58	1122.58	1130.75	1544.42			1482.33	885.67	777.58		1005.33	834	1233.17	813.33		917.58	759.33	797	1194.92	794.17		1041.46	131.21	44.1725			747			1287.33	1065				1406.08	1159.08	1229.37	418.292	62.2413			747	1031.92	833.5	945.42
	748	956.42			1462.33	1116	1126.5	1549.33			1465.58	874.75	777.92		1012.17	835.17	1226.08	806.25		935.17	754.42	780.08	1021.92	786.83		1028.64	118.392	39.8574			748			1275.08	1074.75				1392.67	1169.75	1228.06	416.982	62.0464			748	1031.33	863.33	932.58
	749	962.17			1445.08	1108.33	1109	1555.08			1470.33	883.33	775.08		1007.58	838.42	1326.25	795.25		973	772.33	782.92	1017.83	787.83		1035.87	125.621	42.291			749			1275.17	1072.75				1388.08	1164.17	1225.04	413.962	61.597			749	1025.25	859.75	944
	750	957.67			1458.67	1113.75	1104.67	1547.25			1476.92	892.25	777.75		997.92	835.83	1214.08	796.5		1032.33	769.33	794.58	1018.17	781.17		1033.46	123.211	41.4797			750			1272.25	1103.67				1408.58	1178.58	1240.77	429.69	63.9372			750	1038	870.08	946.58
	751	965.67			1444.5	1110.25	1090.67	1534.5			1477.33	888.42	783.08		999.75	835.75	1212.67	807.75		1013.33	770.17	791.33	1020.25	775.92		1030.67	120.417	40.539			751			1271.83	1060.17				1396.17	1164.58	1223.19	412.107	61.321			751	1020.08	881	940.92
	752	952.08			1448.67	1109.58	1088.25	1549.83			1463.58	882.67	773.92		1002.33	830.25	1245.67	790		1005.83	772.33	788	1006.42	783.17		1028.98	118.725	39.9695			752			1266.67	1078.25				1399.75	1164.92	1227.4	416.317	61.9474			752	1011	860.67	943.42
	753	956.83			1451.5	1115.42	1094.42	1538.75			1468.83	894.33	783.42		1013.75	841.58	1237.58	803.42		998.33	765.42	786.17	1016.92	786.33		1032.53	122.279	41.166			753			1269.58	1070.67				1388.33	1157.08	1221.41	410.335	61.0572			753	1014.58	872.08	940
	754	960.17			1447.67	1117.75	1076.83	1539.08			1450.83	882.67	773.92		1004.83	840.33	1227.25	806.92		1016.17	794.92	794.67	1010.75	785		1031.16	120.912	40.7057			754			1274.08	1068.75				1402.17	1169.17	1228.54	417.462	62.1178			754	1019.08	865.92	946.67
	755	952.08			1457.75	1107	1081.33	1561.25			1472.92	876.25	775.92		991.33	841.5	1232	799.58		996.67	773.17	785.92	1015.67	778.92		1029.37	119.118	40.1017			755			1262.08	1050.08				1400.75	1171.17	1221.02	409.94	60.9984			755	997.25	866.25	954.83
	756	939.75			1445.25	1118.67	1067.5	1552.58			1457.42	882.92	774.33		1005.42	842.42	1236.17	801.83		999.5	757.67	795.5	1021.5	790.75		1028.78	118.525	39.9021			756			1270.08	1065.5				1391.33	1161.92	1222.21	411.127	61.1751			756	994.58	872.33	944.33
	757	946			1444.5	1117.25	1095.75	1547.33			1452.5	876.25	779.33		1006.25	848.42	1232.5	811.5		988.92	753.83	784.83	1002.25	774.5		1027.17	116.921	39.3621			757			1256.75	1055.17				1395.42	1168.42	1218.94	407.86	60.6889			757	1004.92	863.5	946.58
	758	945.33			1444	1102	1073.42	1540			1465.67	872	778.67		980.75	826.92	1227.5	803.67		1007.75	789.58	796.25	1011	772.08		1025.68	115.432	38.8607			758			1248.08	1051				1376.5	1160.08	1208.91	397.835	59.1972			758	929.92	861.33	932.5
	759	944.17			1440	1114	1092.67	1526.5			1460.08	882.83	779.5		996.33	830.58	1226.92	795.75		1004.08	777.33	785.25	1012.25	789		1026.9	116.646	39.2696			759			1247	1054.5				1392.08	1152.58	1211.54	400.46	59.5878			759	932.75	861.67	926.92
	760	953.67			1436.75	1099.58	1081.92	1595.25			1452.75	875.42	774.33		1009.92	840.67	1245.42	801.5		997.25	780.33	784.83	997.83	785.58		1030.18	119.926	40.3738			760			1255.17	1057.58				1382.5	1160.58	1213.96	402.877	59.9475			760	930.5	866.08	948.17
	761	929.17			1435	1102.25	1078.33	1591.33			1458	872	781.5		990.58	854.42	1239.58	809.33		1016.83	777.67	788.75	1006.33	780.08		1030.07	119.818	40.3372			761			1249.5	1055.58				1374.83	1134.33	1203.56	392.48	58.4004			761	936.58	855.67	950.08
	762	943.08			1431.5	1100.42	1083.17	1608.67			1460.17	876.33	776.83		975.42	839.75	1230.58	819.25		1001.33	792.42	778.17	1007.17	782.67		1029.82	119.569	40.2536			762			1276.08	1079.83				1384.83	1147.33	1222.02	410.937	61.1469			762	940.58	867.67	951.67
	763	937.17			1435.75	1101.33	1068.25	1580.42			1446.33	875	775.92		991.08	838.08	1237.08	808.5		1007.75	781.08	782.25	1013.17	788.5		1027.51	117.259	39.476			763			1266.75	1077.25				1371	1141	1214	402.92	59.9539			763	918.75	853	931.08
	764	940.5			1423	1110.67	1078.75	1595.67			1432.83	872.25	786.92		990.5	845.67	1226.83	811.58		995	776.75	789.92	1000.67	773.33		1026.52	116.27	39.1429			764			1267	1081.33				1376.17	1142.08	1216.64	405.565	60.3474			764	908.92	856.92	948.58
	765	926.75			1423.92	1110.5	1079.83	1574.67			1442.5	869.58	779.92		998.67	844.08	1222.42	815.58		989.67	753	786.92	1013.5	783.92		1024.44	114.187	38.4416			765			1257.83	1073.33				1353.17	1147.58	1207.98	396.897	59.0577			765	917.33	868.83	939.5
	766	944.08			1438	1105.5	1077.58	1583.5			1442.5	865.92	792.58		988.42	842.5	1229.83	828.75		997	802.33	784.58	997.33	780.33		1029.45	119.205	40.1309			766			1254.58	1076.42				1357.17	1149.42	1209.4	398.317	59.269			766	920.25	843.25	946.25
	767	931.83			1419.75	1102.25	1083.67	1579.17			1458.92	867	786.25		990.17	839.08	1232.75	806.33		993.25	791.83	780.08	988.5	777.33		1025.19	114.936	38.6937			767			1240	1092.42				1349.5	1139.92	1205.46	394.38	58.6831			767	912.75	857.17	945.08
	768	930.17			1430.08	1078.5	1074.25	1594.08			1445.33	868.75	780.92		992.92	841.33	1228.5	832.92		1000	794.5	784	1002.58	785.42		1027.31	117.059	39.4084			768			1234	1088.33				1343.75	1141.25	1201.83	390.752	58.1434			768	916.17	847.08	943.92
	769	944.67			1425.33	1101.58	1071.5	1568.17			1441.42	865.17	788.33		980.42	838.42	1227.33	820.42		992.25	780.42	778	1023.92	781.83		1025.25	114.996	38.7139			769			1253.25	1085.17				1357.17	1131.83	1206.86	395.775	58.8907			769	912.17	862.5	935.58
	770	938.42			1407.5	1090.33	1070.33	1556.58			1442	850.58	780.5		990	833.42	1235.17	837.42		996.42	795.25	785.58	1012.92	783.58		1023.88	113.632	38.2549			770			1261.5	1079.33				1335.08	1140.75	1204.16	393.085	58.4904			770	910	877.42	932.17
	771	935.17			1431.42	1084.5	1073.33	1569.42			1451.5	869.67	787.42		983.25	839.08	1226.08	832.17		994.08	800.67	785.17	1000.5	785.92		1026.43	116.182	39.1134			771			1231.92	1065.17				1340	1147.33	1196.11	385.025	57.2911			771	916.25	864.67	937.42
	772	925.17			1422	1096.33	1069.25	1555.67			1435	872.67	778.58		977.08	852.75	1238.67	837.17		993.42	795	782.5	1009.83	775.17		1024.49	114.236	38.4581			772			1237.58	1078				1320.83	1136.42	1193.21	382.127	56.86			772	903.75	845.58	942.33
	773	940.58			1418.17	1084.33	1082.17	1561.92			1441.17	854.67	790.33		986.83	837	1223.33	824.75		986.92	789.25	779.67	1006.83	779.58		1022.79	112.544	37.8885			773			1251	1099.92				1329.58	1138.83	1204.83	393.752	58.5898			773	899.42	855.5	931
	774	935.25			1415.08	1081.25	1071.5	1552.25			1439.33	852.67	778.67		987.83	841.83	1364.58	844.83		998	788.33	779.25	1008.58	771.58		1030.05	119.798	40.3305			774			1229.92	1069				1327.67	1139.17	1191.44	380.36	56.597			774	897.67	855.42	937.75
	775	920.33			1411.08	1092.33	1061.83	1568.33			1433.5	867.17	786.5		980.5	838.75	1223.67	825.25		991.25	802.75	784.92	1020.67	779.67		1022.85	112.603	37.9083			775			1241.25	1070				1322.08	1129.67	1190.75	379.67	56.4943			775	911.58	853.92	940.83
	776	934.08			1399.08	1099.5	1059.42	1543.58			1436.67	870.83	779.17		979.42	844.5	1241.33	838.17		988.33	789.17	790.17	1003.92	774.83		1021.89	111.642	37.585			776			1236.58	1064.25				1321	1128.17	1187.5	376.42	56.0107			776	911.92	853.17	935.17
	777	932			1416.83	1076.75	1046.58	1567.5			1436	870.42	774.42		985.75	837.67	1227.83	838.92		986.25	804.75	777.92	1006.17	781.5		1021.6	111.354	37.4877			777			1235.08	1073.92				1324.42	1120.17	1188.4	377.317	56.1443			777	918.75	851.25	925.83
	778	922.58			1388.92	1094.25	1061.17	1574.17			1420.58	868	783		983.17	847.58	1236.08	1111.83		987.33	804	774.92	999.67	784		1037.72	127.471	42.9136			778			1215.33	1067.75				1301.08	1124	1177.04	365.96	54.4543			778	901.75	862.42	936
	779	926.42			1410.5	1099.25	1052.5	1533.75			1410.17	857.92	766.5		986.25	843.5	1239.17	951.08		983	788.75	791.67	1001.33	769.67		1024.2	113.952	38.3624			779			1157.75	1058.92				1321.58	1126.5	1166.19	355.107	52.8394			779	901.92	855	917
	780	918.08			1392.5	1076.58	1119.5	1544.33			1415.25	849.75	776		977.17	851.33	1223.58	829.92		986.33	798.25	773.5	992.92	776.25		1017.72	107.47	36.1803			780			1252.08	1057.58				1324.58	1131.67	1191.48	380.397	56.6026			780	906.25	845.08	935.92
	781	912.83			1403.42	1079.25	1094.33	1544.08			1423.08	858.75	816.17		977.17	856.33	1213.83	842.17		986.17	794.08	764.92	998.25	776.17		1020.06	109.809	36.9677			781			1255	1058.5				1325.25	1140.08	1194.71	383.627	57.0832			781	888.25	852.42	934.08
	782	956.08			1368	1084.5	1098.08	1521.08			1407.5	866.42	784.83		976.5	842.17	1230.33	825.33		986.17	787.83	767.08	1011.75	786.58		1017.66	107.411	36.1603			782			1253.42	1062.33				1290.08	1117	1180.71	369.627	55			782	903.08	846.83	936.92
	783	934.67			1405.75	1068.58	1095.42	1530.58			1395.08	861.75	772.83		978.58	836.83	1219.17	826.75		984.42	795.58	789.08	1005.92	771		1016	105.749	35.6011			783			1236.75	1054.83				1294.25	1123.08	1177.23	366.147	54.4822			783	894.25	832.25	937
	784	925.25			1393.5	1078.67	1070.58	1519.42			1418.42	865.92	788		982.42	855.33	1222.67	829.42		995.75	797.5	772.08	952.67	773.92		1014.21	103.957	34.9977			784			1237.08	1050.58				1307.58	1109.75	1176.25	365.167	54.3364			784	907.42	836.92	1001.75
	785	913.25			1392	1087.67	1086	1512.92			1422.67	898.83	766.83		972.25	857	1240.5	828.25		975.25	800.17	765.58	978.08	786.33		1016.68	106.431	35.8306			785			1248.67	1053.58				1303.58	1126.25	1183.02	371.94	55.3441			785	895.08	853.42	940.33
	786	921.58			1393.5	1104.83	1094.17	1524			1396.67	862.75	762.08		974.08	848.33	1228.17	843.92		988.33	816.5	769.67	985.75	787.08		1017.73	107.48	36.1837			786			1253.75	1045.67				1294.42	1119.58	1178.36	367.275	54.65			786	895	845.17	932.5
	787	929.33			1383.92	1063.83	1099.25	1503.67			1400.83	860.08	768.25		968.58	831.5	1227.08	853.83		986.17	805.92	772	987.33	770.67		1012.48	102.235	34.4178			787			1240	1052.33				1295.58	1111.33	1174.81	363.73	54.1225			787	888.08	843.75	927.17
	788	917.33			1384.42	1080.67	1087.33	1499.33			1413	876.92	780.17		978	842.17	1210.92	847.92		974.75	813.5	761.75	978.08	1090		1031.54	121.295	40.8345			788			1257.75	1043.33				1288	1116	1176.27	365.19	54.3397			788	903.42	840.75	925.75
	789	920.92			1384.42	1099.75	1067.08	1491			1392.67	866.58	765.83		977.5	836.75	1235.83	842.92		983.33	796.75	759.33	992.08	781.67		1011.44	101.186	34.0647			789			1242	1037.83				1290.5	1103.33	1168.41	357.335	53.1709			789	886	845.83	921.92
	790	923.67			1397.75	1066.42	1044.67	1501.83			1389.92	856.83	753.67		964.33	847.67	1224.58	859.08		984.92	794.17	781.67	968.67	785.08		1008.53	98.2753	33.0849			790			1257.67	1048.17				1304.25	1103.58	1178.42	367.337	54.6593			790	896.92	849.92	926.25
	791	913.25			1389.25	1069.17	1047.17	1508.75			1383.42	874.42	765.67		955.42	839.83	1214.92	833.5		979.5	804.08	769.58	973.67	773.33		1005.58	95.3341	32.0947			791			1249.58	1039.33				1296.33	1119.58	1176.2	365.125	54.33			791	878.83	835.17	922.83
	792	906.33			1377.25	1079.33	1059.33	1473.42			1390.83	861.83	762.17		966.67	867.67	1211.33	860		978.83	789.25	774.58	973	767.75		1005.86	95.6071	32.1866			792			1224.17	1033.67				1283.5	1103.67	1161.25	350.173	52.1051			792	885	850.83	923.75
	793	919.83			1392.75	1083.42	1044.17	1505.42			1401.75	869.67	762.83		965.67	846.5	1214.67	850.5		971.25	799.92	771.83	972.25	789.25		1009.51	99.2606	33.4166			793			1230.08	1031.33				1292.42	1119.92	1168.44	357.357	53.1742			793	890.33	838	912.92
	794	908.92			1376.08	1503.25	1038.92	1505.92			1413.17	854	776.25		969.17	852.75	1232.75	839.17		984.33	797.25	768.33	981.17	778.33		1034.1	123.854	41.6959			794			1227	1040.58				1281.17	1097.5	1161.56	350.482	52.1513			794	887.67	829.67	930.08
	795	917.67			1397	1069.25	1037.33	1494.33			1403.17	865.92	761.33		964.67	747.25	1243.92	844.42		976.33	791.17	768.83	974.33	784.42		1002.43	92.1818	31.0335			795			1235.83	1049.17				1288.25	1112.33	1171.39	360.315	53.6143			795	872.33	842.83	921.5
	796	918.83			1381.42	1064.33	1040.75	1495.58			1389.5	877.42	753.83		974.75	736.08	1218.17	836.42		970.83	789.25	773.83	970	781.83		998.401	88.1512	29.6765			796			1230.75	1049.25				1287.33	1112.75	1170.02	358.94	53.4097			796	889.08	840.08	925.5
	797	905.08			1371.58	1055.58	1047.25	1479.58			1369.42	864.5	775.92		972.5	746.42	1220.75	872.17		977.92	797.67	767.42	972	780.67		998.614	88.3635	29.748			797			1226.67	1029.17				1287.83	1105.75	1162.36	351.275	52.2692			797	881.83	842.33	932.5
	798	911.75			1367.42	1083.58	1038.33	1505.5			1390.58	858.17	784.67		960.25	744.25	1221	838.08		974.08	787.25	767.58	975.25	780.58		999.313	89.0629	29.9835			798			1223.92	1032.58				1282.08	1106.17	1161.19	350.107	52.0955			798	874.33	903.83	925.08
	799	921.83			1378.75	1060.83	1045.75	1507.58			1403.83	869	774.58		955.25	730.25	1224	843.08		972.75	783.17	773.67	978.33	791.42		1000.83	90.5776	30.4934			799			1222.5	1022.75				1263.08	1081.33	1147.41	336.335	50.0461			799	875.17	831.67	930.58
	800	913.42			1366.75	1069.75	1033	1481.25			1385.92	862.75	764.67		968.92	747.58	1222.67	849.42		986.08	803.08	766.08	973.08	728.83		995.485	85.2353	28.6949			800			1207.67	1023.33				1275.92	1097.5	1151.11	340.025	50.5952			800	867.83	836.92	913.92
	801	901.17			1385.67	1067.33	1029.5	1489.17			1387.75	873.92	760.67		968.58	741.42	1214.58	846.58		959.92	797.08	756.75	971.75	720.75		992.505	82.2553	27.6917			801			1219.83					1273	1101.17	1198	386.92	57.5731			801	874.08	828.5	920.33
	802	910.17			1373.92	1064.83	1032.75	1485.33			1377.17	882.08	769.67		966.67	732.42	1206.92	847.92		946.08	793.42	765.58	966.33	719.92		990.658	80.4076	27.0696			802			1222.17					1257.58	1106.5	1195.42	384.337	57.1887			802	879.67	839.25	927
	803	899.25			1359	1059.75	1035.75	1348.5			1362.92	885.08	759.5		959.33	751.92	1201.42	845.83		960.67	799.5	768.17	956.08	731.92		981.446	71.1965	23.9686			803			1206.33					1272.75	1090.67	1189.92	378.837	56.3703			803	872.08	830.67	921.25
	804	895.25			1357.17	1065.75	1030.92	1405.5			1383.17	886	756.83		961.92	743.58	1221.67	839		960.83	792.25	757	971.83	712.17		984.755	74.5053	25.0826			804			1204.83					1263.42	1095.58	1187.94	376.863	56.0767			804	870.17	834.5	927.17
	805	900.92			1362.67	1074.42	1033.67	1415.92			1393.75	877.67	756.42		954.75	733.92	1193.67	854.17		957.17	789.42	771.83	973.08	729.92		986.669	76.4188	25.7268			805			1210.5					1259.58	1111.08	1193.72	382.64	56.9362			805	857.58	827.5	935
	806	899.58			1353.42	1064.25	1034.42	1450.92			1378.67	881.25	754.08		968.5	740.83	1218.92	856.08		971.33	799.67	768.75	961.83	712.83		989.137	78.8871	26.5577			806			1203.08					1274.25	1090.75	1189.36	378.28	56.2875			806	876.25	837.33	912
	807	899			1369.67	1049	1025	1461.67			1384.58	895.67	1867.08		967.75	748.33	1211	859.08		964.58	794.17	773.5	965.5	731.92		1056.91	146.662	49.3744			807			1211.42					1263.83	1107.83	1194.36	383.28	57.0315			807	853.67	832.92	917.58
	808	910.83			1353.08	1058.83	1018.58	1445.17			1361.83	880.67	782.42		950.17	740.92	1199.25	855.92		963.42	791.83	771.33	965.17	724.08		986.676	76.4265	25.7294			808			1203.25					1273.83	1086.67	1187.92	376.837	56.0727			808	870.08	828.75	915.33
	809	886.83			1358.17	1063	1013.67	1458.67			1378.42	885.17	751.92		957	734.92	1200.42	860.67		985.67	789.67	768.5	962.08	733.92		987.571	77.3206	26.0304			809			1199					1257.58	1088.25	1181.61	370.53	55.1343			809	854.67	825.5	911
	810	890.58			1367	1058.17	1010.25	1456.67			1381.75	886.25	760.42		960.25	731.33	1181.08	853.67		--	793.67	763.83	972.33	723.75		986.938	76.6875	25.8172			810			1210.75					1261.17	1071.58	1181.17	370.087	55.0683			810	873.25	820.58	916.17
	811	893.33			1353.67	1049.67	1011.83	1456.33			1372.42	882.42	751.25		956.33	742.33	1199.08	859.5		--	843.58	765.08	975.33	729.92		990.129	79.8794	26.8918			811			1204.67					1256.08	1080.75	1180.5	369.42	54.9691			811	860.67	837.67	915.08
	812	902.92			1341.17	1052.67	1047.42	1440.08			1376.08	892.5	758.42		953.33	807.5	1153.33	858.42		--	792.75	751.25	960.92	712.75		987.594	77.3444	26.0384			812			1188					1262.83	1074.92	1175.25	364.17	54.1879			812	855.75	825.83	945.08
	813	892.17			1328	1062.67	1003.08	1390.5			1382.25	881.17	755.83		957.58	815.83	1218.5	873.5		--	782.17	765.5	976.25	726.92		988.245	77.995	26.2574			813			1183.58					1255	1080.92	1173.17	362.087	53.8779			813	845.92	821.5	930.08
	814	897.08			1343.5	1066.67	1010.08	1484.33			1367.67	880.08	761.33		952.25	819.92	1206.17	861.83			798.5	769.25	964.75	731.75		994.697	84.4475	28.4297			814			1182.25					1258	1075.75	1172	360.92	53.7043			814	866.83	825.25	931.92
	815	889.33			1334.5	1057.08	1023.58	1465.75			1369.75	881.5	747.67		942.75	822.5	1228.42	858.08			796.83	752.5	956.92	725.92		990.817	80.5675	27.1235			815			1181.92					1252.67	1077.25	1170.61	359.533	53.498			815	864.75	815.58	928.5
	816	893.58			1340.83	1056	1025.42	1467			1373.83	900.42	761.17		955.08	822.08	1216.42	856.75			791.67	760.25	960.17	728.42		994.318	84.0681	28.302			816			1194.33					1262.83	1074	1177.05	365.973	54.4563			816	860.67	830.83	932.33
	817	899.75			1340.75	1050.5	1008.33	1379.5			1356.42	889.83	764.75		967.5	815.5	1205.42	869.92			788.83	758.33	959.75	735.5		986.911	76.6612	25.8084			817			1206.08					1252.25	1060.42	1172.92	361.837	53.8407			817	850	826.42	924.33
	818	906.58			1365.33	1058.08	1011.25	1391.08			1365.17	897.92	755.67		951.83	825.83	1228.08	857.92			785.33	756.83	952.33	719.42		989.291	79.0406	26.6094			818			1202.5					1255.25	1089.67	1182.47	371.393	55.2628			818	866.75	819	913.42
	819	903.58			1345.17	1053.92	1014.42	1385.83			1360.42	878.92	764.75		943.08	817.58	1205.92	1031.33			797.83	769.25	969.33	717.5		997.427	87.1769	29.3485			819			1195.33					1244.75	1071.5	1170.53	359.447	53.4851			819	846.75	826.83	918.83
	820	917.25			1351.42	1047.92	1005.75	1387.08			1364.42	886.83	757.08		937.08	810.25	1202.17	869.25			785.92	765.42	957.5	725.92		985.704	75.4538	25.4019			820			1202.5					1261.42	1054.67	1172.86	361.783	53.8328			820	883.58	806.75	925.33
	821	905.42			1346.17	1054.5	1011.25	1395.08			1370.17	897	753.17		938.67	844.25	1214.5	878.33			788.5	759.83	959.92	737.42		990.886	80.6363	27.1466			821			1187.08					1242.17	1059	1162.75	351.67	52.328			821	881.92	819.25	920.5
	822	903.42			1331	1061.5	1011.42	1380.92			1366.67	887.25	764.33		946.42	834.33	1208	877.42			786.67	750.75	941.92	705.42		984.84	74.59	25.1111			822			1181.42					1256.92	1062.33	1166.89	355.81	52.944			822	877	822.5	901.42
	823	904.75			1355.33	1052	1004.58	1391.83			1343.67	896	754.83		946.42	835.83	1198.83	876			777.75	769.25	955	722.25		986.52	76.27	25.6767			823			1190.33					1240.83	1061.67	1164.28	353.197	52.5551			823	894.83	812.67	911.17
	824	897.33			1348.33	1053.83	1009.5	1386.75			1367.92	909.42	758.33		942.83	830.92	1201.33	875.67			784.33	770.58	957	713.75		987.989	77.7387	26.1711			824			1181.58					1252.92	1048.67	1161.06	349.977	52.076			824	882.75	825.17	914.25
	825	900.5			1335.58	1059.42	1013.92	1373			1356.58	895.08	758.08		944.5	830.75	1195.67	860.58			794.75	761.17	961.33	714.58		984.718	74.4681	25.0701			825			1171.83					1240.08	1054.92	1155.61	344.53	51.2655			825	886.17	822.42	911.67
	826	895.92			1335.08	1044.58	1003.5	1353.5			1341.33	918.75	756.25		933.5	834.08	1192.58	877.08			789.25	761.08	927.25	706.92		979.416	69.1656	23.285			826			1177.25					1246.42	1059.58	1161.08	350.003	52.08			826	880.5	809.75	917.08
	827	889.58			1326.58	1052.75	1009.92	1361.92			1359.08	928.42	758.83		936.58	831.67	1189.58	877.17			790.58	749.92	943.08	717.42		982.692	72.4425	24.3881			827			1175.25					1241.58	1051.42	1156.08	345.003	51.336			827	882.83	811.42	918.25
	828	909.25			1340.83	1055.08	1018.58	1364.92			1362.17	919.5	768.17		924.58	832.17	1194.25	879.08			790.42	745.83	931.83	712.08		984.296	74.0462	24.928			828			1172					1242.67	1039.58	1151.42	340.337	50.6416			828	890.08	814.33	914.5
	829	899.17			1339.25	1050.83	1013.58	1353.5			1344.33	984.17	760		935.08	829.83	1191.08	874			795.33	745.75	930.08	720.42		985.4	75.15	25.2996			829			1170.17					1233.67	1049.83	1151.22	340.143	50.6128			829	891.5	806.92	915.83
	830	891.58			1340.67	1049.67	999.92	1361.42			1365.92	1001.17	768.5		939.83	823.42	1200.92	884.17			787.75	765	934.17	722.58		989.793	79.5431	26.7786			830			1173.58					1257.5	1044.25	1158.44	347.363	51.6871			830	879.75	813.25	903.17
	831	892.75			1317.5	1045.75	1001.92	1355.25			1349.5	1001.17	762.42		947.25	826.67	1191	880.75			774.67	751.42	931	724.33		984.584	74.3344	25.025			831			1174.08					1242.25	1051.67	1156	344.92	51.3236			831	884.33	826.5	903.5
	832	901.17			1332.5	1044.67	1002.75	1361.17			1363	994.5	758.08		931.42	833.83	1196.67	893.17			786.17	743.5	938.33	712.17		987.069	76.8188	25.8614			832			1178.42					1245.67	1066.92	1163.67	352.59	52.4648			832	879.08	814.92	903.5
	833	887.33			1335.92	1039.67	994.5	1351.5			1367	1019.17	755.75		932.58	833.08	1182	887.83			793.83	751.08	920.5	718.58		985.645	75.395	25.3821			833			1169.75					1253	1052.08	1158.28	347.197	51.6623			833	877.42	811.42	907.25
	834	896			1338.75	1054.42	995.58	1368.17			1357	1004.67	747.25		949.33	829.42	1195.58	891.67			784.83	750.08	1004.92	720		992.979	82.7294	27.8513			834			1175.83					1228.33	1056.67	1153.61	342.53	50.9679			834	876.33	815.42	901.75
	835	896.58			1311.33	1048.25	1001.58	1352.75			1334.25	993.58	777.08		928.42	835.92	1193.67	892.58			794.58	754.17	926.75	726.17		985.479	75.2287	25.3261			835			1168.08					1222	1027.75	1139.28	328.197	48.8352			835	877.92	808.92	916.42
	836	899.67			1310.25	1045	993.67	1348.83			1361	1000.75	760.67		932.58	837.58	1183	899.33			788	744.83	948.83	724.75		986.171	75.9212	25.5593			836			1175.33					1228.83	1058.58	1154.25	343.167	51.0627			836	882	804.92	913.08
	837	896.17			1322.42	1055.08	986.08	1344.42			1342.33	1021.17	766.67		936.67	839.92	949	919.33			789.67	754.33	941.67	713		973.621	63.3706	21.334			837			1155.25					1238.92	1037.75	1143.97	332.893	49.534			837	863.92	798.42	898.92
	838	888.5			1318.67	1042	995.42	1348.08			1349.5	1009.92	770		929.75	823.58	477.92	927.08			784.33	756.67	936.75	713.75		941.995	31.745	10.6871			838			1156					1236.58	1037	1143.19	332.113	49.418			838	872.33	804.42	897
	839	886.5			1320.17	1035.17	999.25	1366.17			1337.67	1008.5	772.75		933.83	842.67	1133.25	915.83			785.5	754.25	940.83	706.25		983.662	73.4119	24.7145			839			1166.25					1228.17	1040.08	1144.83	333.753	49.662			839	870.25	799.17	907
	840	891.83			1306.83	1046.92	1040.67	1344.58			1348.42	1002.83	767		942.58	832.67	1126.17	932.67			781.83	747.5	928.17	715.5		984.761	74.5106	25.0844			840			1156.42					1237.42	1046.75	1146.86	335.783	49.964			840	868.75	814.08	904.67
	841	886.83			1303.33	1033.67	991.67	1345.25			1343.67	1002.83	818.08		928.92	847.67	1134.5	944.83			790.33	764.75	936.33	715.75		986.776	76.5256	25.7627			841			1163.33					1241.42	1023.83	1142.86	331.78	49.3684			841	870.08	815.17	920.08
	842	900.5			1322.92	1026.25	982.5	1339.92			1335.92	997.42	769.5		922.75	832.75	1137.17	936.92			787.08	754.83	925.08	716.08		980.474	70.2244	23.6414			842			1155.42					1216	1032.25	1134.56	323.477	48.1328			842	868.83	807	911.5
	843	877.75			1322.5	1030.92	1000.83	1343.25			1330.33	1006.08	774.83		922.25	845.08	1148.08	948.67			791.25	748.25	940.67	723.75		984.656	74.4056	25.049			843			1151					1218.42	1037.42	1135.61	324.533	48.2901			843	873.67	805.08	914.42
	844	879.33			1302.67	1046	986.42	1341.5			1334.17	1005.67	773		918.5	841.42	1139.25	943.75			783.17	747.42	940.67	705.67		980.538	70.2881	23.6628			844			1162.33					1225.67	1020.25	1136.08	325.003	48.36			844	876.25	802.58	902.17
	845	885.08			1306.83	1035.67	984.83	1350.83			1350.25	1006.42	785.33		936.67	854.58	1150.92	940.83			787.5	747.92	930	716.75		985.651	75.4006	25.384			845			1159.83					1215.42	1028.67	1134.64	323.56	48.1452			845	849.92	793.75	901.33
	846	889.33			1335.5	1025.92	981	1352.42			1337.58	1009.5	768.33		930.58	840	1147.92	945.92			792.5	743.5	910.75	710.83		982.599	72.3487	24.3566			846			1156.92					1234.17	1036.17	1142.42	331.34	49.3029			846	867.08	807.25	902.33
	847	882.5			1307.67	1043.42	985.67	1329.92			1321.67	1015.92	788.58		937	855.92	1146.83	950.58			782.17	749.67	925.17	711.17		983.366	73.1163	24.615			847			1140.42					1222.67	1034.25	1132.45	321.367	47.8189			847	862.83	808.75	894.33
	848	881.33			1317.67	1030.17	983.42	1322.83			1337.92	1025	776.58		923.92	834.17	1140.17	966.25			790.67	752.33	927.58	704.17		982.136	71.8863	24.2009			848			1152.67					1206.75	1023	1127.47	316.393	47.0788			848	878.17	816	890.42
	849	893.67			1291.42	1029.83	991.17	1323.5			1339.25	1018.5	783.58		928	843.75	1142.25	949.83			787.83	746	926.58	709.5		981.541	71.2912	24.0006			849			1142.33					1219.33	1031.92	1131.19	320.113	47.6324			849	849.17	802	908.42
	850	881.67			1308.92	1051.5	993.58	1351.75			1342.58	1037	771.92		927.83	839.33	1144.25	952.25			777.5	736.75	931.25	716.67		985.297	75.0469	25.2649			850			1163.67					1223.33	1034.58	1140.53	329.447	49.0212			850	866.58	801.92	894.42
	851	894.42			1318.58	1027.58	985.33	1322.08			1333.42	1025.42	783.25		929.33	851.08	1128.92	962.08			785.58	748.25	928.92	722.67		984.182	73.9319	24.8895			851			1155.58					1218.75	1034.17	1136.17	325.087	48.3724			851	860.42	798.83	899.25
	852	885.08			1263	1042.5	987.5	1320.83			1340.5	1023.83	795.08		916.83	830.75	1145.75	965.67			794.33	732.33	916.5	720.83		980.082	69.8319	23.5092			852			1141.5					1201.58	1016.75	1119.94	308.863	45.9584			852	860.08	809.58	905.17
	853	868.92			1300.17	1036.5	987.08	1349.42			1326.33	1040.58	785.75		927.67	846.58	1145.83	967.83			781.08	744.92	925.58	715.17		984.338	74.0881	24.9421			853			1150.5					1209.67	1026.08	1128.75	317.67	47.2688			853	854.08	787.17	904.5
	854	873.08			1322.5	1041.75	986.75	1349.83			1331.67	1030.33	784.25		903.5	835.58	1437.17	971.33			790.42	746.83	928.5	712.17		1002.85	92.6037	31.1755			854			1154					1224.58	1013.75	1130.78	319.697	47.5704			854	851.67	787	904
	855	886.5			1297.33	1011	982.58	1361.33			1324.75	1033.5	794.08		934.08	852.42	1127.58	956.42			778.58	742.5	920.42	714.08		982.322	72.0719	24.2634			855			1150.83					1221.33	1032.58	1134.91	323.833	48.1859			855	850.75	805.17	893.75
	856	870.67			1291.33	1020.92	985.5	1338.5			1316.08	1026.67	786.08		918.33	846.75	1142.17	965.5			779.92	735.17	897.5	715.75		977.303	67.0525	22.5736			856			1133.42					1212.75	1018.17	1121.45	310.367	46.1821			856	855.92	797.08	885.92
	857	876.25			1301.75	1038.5	990.08	1335.58			1330.92	1031.42	785.58		922.83	869	1121.5	962.08			789.5	737.58	932.17	719.33		984.004	73.7544	24.8298			857			1137.5					1204.42	1005.67	1115.86	304.783	45.3513			857	848.25	791.58	906.25
	858	873.5			1291.33	1020.92	991.75	1336.5			1330.75	1022.83	796.58		919.5	852.75	1138.42	959.5			783.42	733.17	929.92	706.83		980.479	70.2294	23.6431			858			1128.5					1204.92	1019.75	1117.72	306.643	45.6281			858	849.58	786.25	913.25
	859	874.42			1296.5	1018.08	969.75	1335.33			1326.83	1044.33	791.92		912.17	857.67	1120.67	948.75			788.08	738.58	919.08	712.33		978.406	68.1556	22.9449			859			1142.75					1208	1015.92	1122.22	311.143	46.2976			859	852.83	798.25	896.67
	860	864.5			1296.25	1025.08	972.25	1323.75			1330.75	1023	788.08		921.5	853.5	1136.42	956.92			783.17	740.17	928.17	712.83		978.521	68.2713	22.9839			860			1121.67					1204.33	1021.75	1115.92	304.837	45.3592			860	854.67	795	899.67
	861	875.92			1291.83	1022.42	996.08	1330			1317.17	1030.08	785.08		925.17	855.33	1141.5	960.58			786.75	744.08	911.42	711.08		980.281	70.0306	23.5762			861			1110.17					1204.33	1005.92	1106.81	295.727	44.0037			861	856.42	797.25	893
	862	868.58			1275.33	1016.17	968.08	1316.58			1334.17	1034.83	794.75		923.92	862.08	1134.75	954.17			780.33	744.83	934.08	708.92		978.223	67.9731	22.8835			862			1126.75					1204.83	1011.33	1114.3	303.223	45.1192			862	853.75	790.5	884.25
	863	868.75			1290.58	1017.25	976.67	1326			1325.92	1051.92	795.92		922.17	863.08	1140.33	968.17			790.67	721.42	922.83	716.92		981.163	70.9125	23.873			863			1115.58					1208.58	1008.5	1110.89	299.807	44.6108			863	853.42	792.42	902.58
	864	881.08			1284.83	1032.58	977.67	1308.5			1325.33	1036.08	791.25		897.17	876.17	1133.83	965.83			786.58	713.92	927.42	714.75		978.312	68.0619	22.9134			864			1116.08					1213	1129.92	1153	341.92	50.8772			864	851.75	791	892.83
	865	868.83			1296.5	1017.25	988.5	1322.08			1323.67	1036.25	806		917	857.17	1125.5	960.42			780.33	721.25	914.83	717.75		978.333	68.0831	22.9205			865			1114.5					1207.17	1131.17	1150.95	339.867	50.5716			865	852.92	782.25	893.33
	866	866.75			1278.92	1009.17	981.5	1311.42			1319.5	1051.08	802.17		904.92	873.67	1134.75	962.33			783.42	726.92	920.42	717.83		977.798	67.5481	22.7404			866			1131.5					1206.92	1121.67	1153.36	342.283	50.9312			866	865.75	782.67	880
	867	874.92			1288.33	1020.42	979.17	1308.75			1316.58	1040.42	805.83		908.67	853.33	1126.25	959.67			793.92	722	930.83	709.75		977.428	67.1775	22.6156			867			1122.17					1210.33	1120.42	1150.97	339.893	50.5756			867	846.42	792.75	906.92
	868	875.58			1261.75	1019.42	985.5	1303.58			1324.17	1051	874		932.58	1150.25	1147.58	955.58			784.17	716.58	922.75	703.5		1000.5	90.2494	30.3829			868			1105					1198.83	1124	1142.61	331.53	49.3312			868	847.33	789.5	880.58
	869	863.67			1279.58	1005.67	969.83	1312.25			1317.25	1044.5	881.08		914.92	858.75	1117.83	956.42			772.33	718.67	924.75	712.67		978.136	67.8856	22.854			869			1112.58					1203.33	1115.25	1143.72	332.64	49.4963			869	851	790.33	884.5
	870	865.92			1260.17	1028.75	975.83	1306.42			1308.42	1047.42	884.42		911.58	876.08	1117.75	950.75			788.75	719.67	928.42	713.33		980.23	69.98	23.5591			870			1119.42					1205.83	1117.83	1147.69	336.613	50.0875			870	836.42	799.08	875.83
	871	873.5			1282.08	1018.58	973.83	1331.92			1303.67	1047.67	872.33		917.58	884.42	1131.5	960.08			778	722.17	915.08	713.17		982.849	72.5987	24.4407			871			1110					1208.67	1113.42	1144.03	332.95	49.5424			871	836	784.58	896.17
	872	867			1271.08	1029	964.33	1296.83			1303.58	1046.67	867.58		903.17	874.5	1117.5	950.92			773	727.75	919	706.33		976.14	65.89	22.1822			872			1090.58					1188.08	1114.33	1131	319.917	47.6031			872	858.5	783.5	892.83
	873	863.17			1273.08	1027.33	--	1301.25			1317.92	1043.08	868.67		909.67	861	1117.33	950.42			799.25	717	920.25	765		982.295	72.0447	24.2542			873			1098.08					1198.83	1104	1133.64	322.557	47.9959			873	856.25	801.33	892.17
	874	864.08			1276.83	1013.83	--	1302.75			1315.75	1060	870.5		911.58	882.67	1128.67	950.58			790.75	717.67	923.92	774.83		985.627	75.3773	25.3762			874			1107.08					1193.25	1119.5	1139.94	328.863	48.9344			874	858.75	792.25	889.58
	875	855.92			1272.17	1006.25	--	1283.58			1312.67	1061.92	861.08		903.42	867.58	1117.42	952.92			787.08	727.83	934.83	787.42		982.139	71.8893	24.2019			875			1095.17					1185.33	1119.25	1133.25	322.17	47.9384			875	861.83	795.75	900.92
	876	868.08			1250.83	978.17	--	1304			1323.83	1072.25	871.33		915.08	874.92	1112.33	951.58			787	717.5	913.75	774.08		980.982	70.732	23.8123			876			1096.58					1191.92	1110.42	1132.97	321.893	47.8972			876	856.75	784.58	880.67
	877	868.58			1267.5	982.5	--	1305.75			1315	1066	866.25		900.75	864.67	1110.92	943.17			789.58	725.25	901.67	768.67		978.417	68.1673	22.9489			877			1101					1197.25	1094.42	1130.89	319.81	47.5872			877	843.58	789.67	881.42
	878	871.67			1273.25	963.5		1292.83			1311.08	1086.58	878.17		911	882.08	1113.17	927.83			776.08	718.83	1015.42	721.25		982.849	72.5993	24.4409			878			1092.83					1195.08	1083.92	1123.94	312.863	46.5536			878	856.08	800.67	882.67
	879	859.33			1261	976.17		1296.33			1296.75	1061.25	871.42		894.5	865.75	1113.08	938.42			785.5	730.5	917.42	714.92		972.156	61.906	20.841			879			1101.75					1194.08	1119	1138.28	327.197	48.6864			879	859.92	775.08	883.58
	880	857.75			1258.83	956.08		1298.42			1321.58	1073.08	874.67		908.58	872.42	1117.25	939.33			785.17	735	927	718.67		976.255	66.0053	22.221			880			1106					1200.75	1103.75	1136.83	325.753	48.4716			880	864.42	787.75	887.25
	881	858.75			1263.25	971.17		1283.83			1308.5	1087.58	877.92		895.42	789.75	1106	926.58			789	719.42	924.08	714.42		967.711	57.4613	19.3446			881			1107.75					1193.33	1098.58	1133.22	322.14	47.9339			881	850.42	793.25	882.42
	882	869.83			1258	976.42		1293.42			1307.42	1092.83	878.25		902.42	773.75	1113	944.5			778.17	715.42	916.42	712.67		968.835	58.5847	19.7228			882			1099.75					1194.92	1097.75	1130.81	319.727	47.5748			882	852.75	781.25	881.08
	883	859.42			1267.83	957.5		1285.67			1309.17	1091.5	899		894.58	768.5	1106.17	941			783.42	722.25	918.75	717.75		968.167	57.9173	19.4982			883			1082.17					1183.33	1116.5	1127.33	316.253	47.058			883	846.75	790.17	875.83
	884	855.17			1252	971		1301.42			1307.08	1098.92	900.08		913.75	773.33	1109.25	943.67			783.5	721	929	716.58		971.717	61.4667	20.6931			884			1107					1176.58	1110.25	1131.28	320.197	47.6448			884	857.33	770.25	893.92
	885	857.25			1270.17	972.75		1303.75			1303.42	1089.92	911.33		903	765.67	1112.83	946.92			788.75	717.25	921.5	712.5		971.801	61.5507	20.7213			885			1093.67					1187	1097.42	1126.03	314.95	46.8641			885	851.75	795.42	868.92
	886	859.58			1250.75	963.33		1297.58			1308.58	1109.5	916		904.67	772.58	1086	943.25			780.5	707.67	919.75	709.08		968.588	58.338	19.6398			886			1097.75					1176	1100.25	1124.67	313.587	46.6612			886	850.5	777.58	879.25
	887	851.67			1243.33	960.58		1281.58			1290.33	1101.33	909.83		911.33	778.83	1093.92	940.25			775.17	743.75	908.83	698.83		965.971	55.7207	18.7586			887			1099.5					1182.33	1094.5	1125.44	314.363	46.7768			887	853.83	785.83	871.58
	888	866.25			1247.25	961.75		1283			1301.92	1102.33	910.08		902.5	829.83	1093.83	932.92			776.83	726.25	915.5	697.83		969.871	59.6213	20.0718			888			1087.58					1180.92	1087.75	1118.75	307.67	45.7808			888	853.42	773.92	880.83
	889	844.92			1262.08	971.17		1278.75			1287.42	1102.5	923.33		904.83	772.17	1086.42	943.58			790.5	714.08	901.83	717.25		966.722	56.472	19.0116			889			1083.5					1178.67	1099.33	1120.5	309.42	46.0412			889	835.42	778.25	866.08
	890	855.42			1259.17	967		1272.33			1285.08	1114.83	924.67		904.17	772.92	1080.67	938			782.08	708.17	901.08	709.08		964.978	54.728	18.4245			890			1092.83					1172.67	1088	1117.83	306.753	45.6444			890	839.42	790.67	882.67
	891	862.08			1253.75	966.92		1278.17			1303.92	1105.5	959		894.83	770	1092	945.5			789.92	712.83	913.33	713.92		970.778	60.528	20.3771			891			1093.5						1101.75	1097.62	286.545	42.6375			891	843.08	786.42	874.17
	892	849.83			1256.75	970.08		1280.67			1294.83	1115.58	934.5		895.25	789.92	1076	934.08			785	724.67	917.67	721.17		969.733	59.4833	20.0254			892			1063.08						1098.58	1080.83	269.75	40.1384			892	864.75	777.58	878.67
	893	844.5			1258.33	969.08		1281			1283.67	1122.5	940.92		912.33	786.83	1076.42	946.25			786.5	721.42	912.08	712.17		970.267	60.0167	20.2049			893			1078.5						1089.67	1084.09	273.005	40.6227			893	844.75	775.25	870.67
	894	848.17			1246.83	977.75		1277.92			1291.42	1122.75	973.42		905.25	790.33	1075.33	909.67			796.83	718.83	906.92	704.75		969.745	59.4947	20.0292			894			1087.83						1090	1088.91	277.835	41.3414			894	833.92	779.17	857.92
	895	851.42			1253	964.92		1284.75			1320.75	1114.75	979.92		896.5	774.58	1094.17	912.75			793.17	707.75	911.67	706.25		971.09	60.84	20.4821			895			1070.67						1087	1078.84	267.755	39.8415			895	860.42	780.17	878.75
	896	857.08			1248.17	949.92		1281			1306.25	1141.75	985.25		892.25	784.42	1106.17	908.08			788.33	706.67	916.17	709.42		972.062	61.812	20.8093			896			1088.25						1088.67	1088.46	277.38	41.2737			896	844.25	782.75	879.5
	897	857			1247.42	966.42		1273.92			1291.58	1141.75	1016.83		894.75	770.42	1083.75	916.67			796.25	701.83	923.75	717		973.289	63.0393	21.2225			897			1089.67						1099.42	1094.55	283.465	42.1792			897	846.33	791.08	882.83
	898	850.75			1257.83	980.25		1251.92			1283.83	1141.25	1044.42		890.58	771.75	1073.5	922.67			787.58	721.17	897.33	708		972.189	61.9387	20.852			898			1080						1096.75	1088.38	277.295	41.2611			898	852.08	767.25	865.08
	899	841.92			1263.75	954.92		1277.5			1290.75	1151.67	1030.08		899.08	771	1086.25	928.75			775.08	715.92	905	717.83		973.967	63.7167	21.4505			899			1070.58						1085.33	1077.95	266.875	39.7106			899	833.08	772.08	863.17
	900	857.25			1243.83	966.58		1263.42			1295.08	1138.83	1051.08		910.58	790	1078.25	925.17			780.25	716.58	919.75	707.67		976.288	66.038	22.232			900			1081.5						1076.58	1079.04	267.96	39.872			900	839.67	770.33	866.42
	901	866.83			1239.67	945.67		1268.25			1301.5	1124.83	1065.92		885.17	780.42	1090.83	923.08			777.92	711.75	914.08	712.5		973.895	63.6447	21.4263			901			1092.58						1082.25	1087.41	276.335	41.1182			901	845.58	778.33	873.08
	902	856.25			1247.75	952.5		1261.58			1296.67	1147.5	1077.58		887.58	783.08	1082	947			776.83	727.08	904.5	724.75		978.177	67.9267	22.8679			902			1067.17						1087.83	1077.5	266.42	39.6429			902	846.33	780.67	879.67
	903	841.92			1233	965.33		1264.92			1278	1136	1104.5		906.92	768.83	1086.92	926.92			792	717.08	910.58	707.58		976.033	65.7833	22.1463			903			1058.5						1075.83	1067.16	256.085	38.1051			903	848.58	791.92	873.83
	904	850.33			1247.42	972.58		1268.25			1289.33	1155.83	1118		894.92	789.5	1075.92	940.67			780.25	720.75	903.17	723.67		982.039	71.7893	24.1682			904			1068						1080.33	1074.16	263.085	39.1466			904	842.83	768.5	877.67
	905	857.75			1240.17	954.75		1258.92			1298.92	1158.17	1124.75		886.67	782.25	1072.17	938.08			786.67	744.75	921.75	723.42		983.279	73.0293	24.5857			905			1076.67						1092.17	1084.42	273.34	40.6726			905	897.08	786.67	872.42
	906	836.67			1236.67	950.42		1268.67			1278.92	1171	1123.83		880.25	787.25	1077.08	953.17			782.58	710.17	912.67	709		978.557	68.3067	22.9958			906			1075.17						1078.33	1076.75	265.67	39.5313			906	842.92	775.08	872.17
	907	842.17			1229.75	955.17		1250.42			1285.25	1169	1144.75		894.33	778	1070.92	938.17			778	713.33	919.42	715.92		978.973	68.7233	23.1361			907			1075.67						1082.75	1079.21	268.13	39.8973			907	837.08	784.92	873.25
	908	833.25			1219.75	951.75		1248.08			1273.17	1185.83	1170.42		893.33	791.42	1070.67	954.92			778.08	710	913.67	722		981.089	70.8393	23.8484			908			1064						1068.08	1066.04	254.96	37.9377			908	847.75	785	867.25
	909	841.25			1244.08	960.5		1257.33			1266.83	1169.08	1189.5		895.42	779.08	1076.5	953.58			784.92	715.33	911.42	725.42		984.683	74.4327	25.0581			909			1055.08						1077.58	1066.33	255.25	37.9808			909	842.5	777.5	875.83
	910	846.92			1227.08	970.67		1265.17			1290.33	1173.08	1215.42		890.5	777.17	1081.17	947.75			789	708.33	910.67	712.33		987.039	76.7893	25.8515			910			1052.08						1066	1059.04	247.96	36.8961			910	846.58	759.83	869.75
	911	845.67			1231.58	--		1255.75			1270	1166.75	1256.92		889.25	775.33	1069	950			784	704.5	904.25	--		1007.92	97.6731	32.8821			911			1057.67						1065	1061.34	250.255	37.2376			911	829	768.83	923
	912	842.42			1244.75	--		1239.08			1270.67	1171.83	1274.33		887.92	782.58	1073.58	943.5			784.75	707.17	898	--		1009.28	99.0254	33.3374			912			1072.5						1093.83	1083.16	272.085	40.4858			912	852.5	772.33	875.5
	913	844.67			1233	--		1237.33			1280.92	1179.92	1304.83		890.83	781.08	1052.17	959.67			796.75	714	905.17	--		1013.87	103.622	34.885			913			1059.58						1073	1066.29	255.21	37.9749			913	844.33	794.17	873.33
	914	828.33			1240.58	--		1249.33			1275.58	1179	1312.83		894.67	786.58	1061.08	967.58			780.17	712.92	909.67	--		1015.26	105.005	35.3506			914			1055.5						1073.42	1064.46	253.38	37.7026			914	842.83	774	876.25
	915	835.5			1214	--		1239.17			1461.67	1203.58	1338.17		884	787.33	1062.17	970.58			782.08	713.42	907.42	--		1030.7	120.449	40.5498			915			1048.67						1068	1058.34	247.255	36.7912			915	843.42	769.58	867.92
	916	821.5			1230.25			1242.83			1286.25	1192	1363.33		890.08	778.58	1062.58	960.58			784.42	709.42	902.83	--		1017.28	107.031	36.0324			916			1054.33						1065.67	1060	248.92	37.0389			916	839.25	775.08	868
	917	836.67			1216.17			1254.42			1258.25	1198	1374.83		885.42	795	1074.33	975.33			772.75	711.83	904.83	--		1019.83	109.583	36.8917			917			1049.75						1070.33	1060.04	248.96	37.0449			917	856.08	775	856.25
	918	835.83			1231.83			1247.67			1275.5	1210.33	1397.83		890.83	783.08	1055.67	961.58			786.5	706.08	896.17	--		1021.45	111.204	37.4373			918			1050.75						1073.58	1062.16	251.085	37.3611			918	857	784	869.75
	919	835.08			1225.5			1249.5			1274.25	1214.25	1409.33		891.67	793.75	1056.5	1007.42			777.25	699.42	903.83	--		1025.98	115.731	38.9613			919			1051.25						1073.58	1062.41	251.335	37.3983			919	845.08	767.08	862
	920	837.17			1195.08			1284.25			1279.92	1215	1405.25		899.08	793.25	1066.33	984.17			786.17	708.83	907.67	--		1027.86	117.609	39.5937			920			1060.5						1068.58	1064.54	253.46	37.7145			920	835.17	773.42	845.08
	921	827.83			1214.17			1234.25			1273.08	1225.25	1425		891.92	787.92	1049.08	974.33			788.08	709.08	904.5			1023.42	113.172	38.1			921			1054.75						1060.67	1057.71	246.63	36.6982			921	826.67	771.25	866.92
	922	832.83			1230.17			1238.17			1267.75	1223.08	1428.42		878.17	768.83	1055.42	989			774.67	717.58	887.17			1022.4	112.155	37.7574			922			1048.92						1063.92	1056.42	245.34	36.5062			922	832.33	770.33	853.58
	923	838.42			1213.67			1228.58			1276.17	1235.25	1415.83		867.08	788.42	1062.33	977.83			784.42	705.33	907.17			1023.12	112.865	37.9967			923			1038.5						1063.42	1050.96	239.88	35.6938			923	863	761.5	875.17
	924	831.25			1219.33			1226.75			1272.42	1245.5	1408.83		887.17	810	1050.75	973.5			780.92	716.42	900.83			1024.9	114.648	38.5967			924			1045						1065.08	1055.04	243.96	36.3009			924	837.42	770.5	865.92
	925	836.75			1224.08			1235.25			1287.5	1216.5	1412.42		875.42	778.75	1041.33	995.75			775.83	709.08	898.83			1022.11	111.865	37.6598			925			1045.58						1073.67	1059.62	248.545	36.9831			925	880.92	759.25	870.75
	926	830.67			1211.92			1238.75			1268.33	1232.42	1410.58		891.75	759.92	1050.42	982.5			769.42	719.25	923.58			1022.27	112.02	37.7121			926			1038.25						1073.17	1055.71	244.63	36.4006			926	877.83	780.67	870.25
	927	833.92			1211.83			1233			1281.42	1243.67	1415.08		883.83	767.92	1053.08	879.25			764.42	717.83	914.75			1015.38	105.135	35.3941			927			1043.83						1053.83	1048.83	237.75	35.3768			927	879.83	773.08	865.25
	928	824.42			1221.25			1225.25			1281.08	1251.33	1413		873.75	758.75	1049.58	922			768.75	713.33	913			1016.58	106.326	35.7952			928			1044.5						1058.92	1051.71	240.63	35.8054			928	899.25	766.58	858.5
	929	825.83			1227.42			1222			1264.75	1252.25	1421.08		877.42	762.5	1039.33	919.5			771.5	708.83	914.5			1015.92	105.666	35.573			929			1034.67						1066.92	1050.8	239.715	35.6692			929	875.42	763.75	865.5
	930	836.67			1227.75			1212.17			1275.08	1243.42	1409.25		880.5	753.67	1038.58	924.17			773.67	710.08	901.33			1014.33	104.084	35.0403			930			1043.25						1064.42	1053.84	242.755	36.1216			930	877.58	763.67	862.25
	931	836.08			1215			1219.58			1277.33	1242.67	1401.92		882.08	764.08	1048.17	923.42			769	717.92	908.08			1015.79	105.545	35.5321			931			1047.5						1057.17	1052.34	241.255	35.8984			931	874.42	761.67	859.42
	932	839.58			1221.25			1203.58			1280.67	1246.25	1403.17		878.75	760.75	1052.08	925.42			757.5	716.92	904.58			1014.65	104.404	35.1481			932			1036.67						1068.33	1052.5	241.42	35.9229			932	877.33	769.58	856.75
	933	839.67			1197.92			1208.67			1258.67	1265	1386.92		882.67	777.67	1042.67	924.17			775.17	714.17	907.5			1013.91	103.663	34.8987			933			1055.75						1065	1060.38	249.295	37.0947			933	886.33	775.67	853.42
	934	830.58			1199.42			1213.58			1263.58	1270.92	1395.58		863.5	769.75	1038.5	923.58			773.17	706.92	906.08			1011.94	101.685	34.2329			934			1045.17						1064.83	1055	243.92	36.2949			934	895.25	762.92	857.17
	935	837.08			1207.83			1210			1267.75	1276.17	1397.83		874.92	763	1048.42	926.83			763.58	696	911.25			1013.9	103.647	34.8933			935			1022.67						1072.58	1047.62	236.545	35.1975			935	913.25	777.58	854.08
	936	822.08			1214.08			1199.92			1265.17	1267.33	1415.17		870.42	764.83	1047.08	927.25			767.58	702.75	908.17			1013.22	102.968	34.6646			936			1049.08						1061.83	1055.45	244.375	36.3626			936	921.67	768.25	867.5
	937	826			1220.83			1207.75			1271.75	1261.58	1387.67		870.58	767.83	1051.83	943.33			769.75	701	901.33			1013.94	103.691	34.908			937			1048.75						1059.25	1054	242.92	36.1461			937	896.25	779.5	881.33
	938	826.08			1213			1203.58			1253.17	1272.42	1377.83		873.67	758	1041	963.58			766.58	712.83	892.42			1011.86	101.608	34.207			938			1039.17						1048.83	1044	232.92	34.6581			938	904	757.83	888.5
	939	817.5			1192.33			1198.92			1262.83	1282.92	1378.75		894.83	769.42	1031.25	948.83			763.75	701.5	895.58			1010.65	100.397	33.7991			939			1029.83						1054.42	1042.12	231.045	34.3791			939	900.25	766.67	891.42
	940	825.08			1207.17			1211.17			1263.92	1270.25	1392.67		876.92	761.92	1036.5	952.83			774.83	710.42	896.08			1013.83	103.578	34.8699			940			1027.33						1056	1041.66	230.585	34.3107			940	887.58	754.25	887.08
	941	826.92			1206.75			1210.08			1253	1268.42	1372.75		867.75	773.83	1042.33	964.83			763	710.75	901.33			1012.44	102.192	34.4033			941			1036.17						1059.08	1047.62	236.545	35.1975			941	896.75	750.83	884.67
	942	841.67			1203.42			1203.58			1247.75	1281.42	1380.25		867.08	750.42	1042.83	955			773.33	698.5	897.67			1010.99	100.744	33.9159			942			1026.83						1055.42	1041.12	230.045	34.2303			942	894.83	743.67	886.58
	943	840.08			1197.58			1224			1265.92	1269.92	1356.42		868.67	759.33	1046.67	958.5			761.67	714.42	899.83			1012.54	102.289	34.4362			943			1039.67						1043.58	1041.62	230.545	34.3047			943	891.58	759.33	888.42
	944	838			1211.42			1191.58			1245.42	1283.58	1372.5		868.58	774.75	1060.42	951.17			769.33	708.42	909.83			1014.23	103.981	35.0056			944			1043.92						1054.33	1049.12	238.045	35.4207			944	897.75	744.75	874.67
	945	823.58			1206.33			1206.83			1258.25	1279.08	1368.33		866	765.5	1030.92	939.17			770.25	716.42	897.5			1009.86	99.6085	33.5337			945			1028.42						1058.83	1043.62	232.545	34.6023			945	898.5	747.58	882.5
	946	824.75			1205.17			1212.75			1251.92	1300	1376.08		873.67	761.83	1045.17	945.25			762.67	705.17	891.5			1011.99	101.745	34.2528			946			1035.67						1059.42	1047.55	236.465	35.1856			946	908.5	746.17	890.42
	947	817.33			1208.92			1200.25			1245.83	1287.67	1360.67		867.92	774.08	1031.25	960.42			763.67	711.75	888.25			1009.08	98.8277	33.2708			947			1038.33						1037.92	1038.12	227.045	33.7839			947	897.42	744.92	876.17
	948	831.33			1205.42			1192			1253.17	1272.83	1377.08		861.42	758.17	1023.17	961.08			775.25	687.67	886.67			1006.56	96.3085	32.4227			948			1031.5						1041.17	1036.34	225.255	33.5176			948	884.08	750.67	877.83
	949	821			1195.17			1179.42			1278.08	1290.75	1339.67		871.08	774.75	1030.17	998			758.25	703.33	890			1009.97	99.7246	33.5728			949			1026.5						1056.75	1041.62	230.545	34.3047			949	881.58	758.67	883.67
	950	821.83			1195.17			1200.75			1257.5	1277.67	1340		853.42	766.67	1027.58	976.33			759.92	714.17	895.5			1006.65	96.4046	32.4551			950			1024.25						1047.75	1036	224.92	33.4677			950	901.92	742.58	883.58
	951	819.5			1191.17			1190			1256.58	1270.58	1343.92		865.67	775.17	1019.08	970.67			773.5	708.08	892.08			1005.85	95.5962	32.1829			951			1019.33						1060.08	1039.7	228.625	34.019			951	891.75	748.83	883.17
	952	830.25			1196.17			1188.25			1249.25	1275.17	1334		866.83	767.75	1024.67	976.17			775.75	704.67	895.75			1006.51	96.2638	32.4077			952			1030.58						1042.08	1036.33	225.25	33.5169			952	884.83	741.5	885.33
	953	828.42			1172.58			1192.75			1241.42	1266.25	1335.67		866.25	776.58	1020.08	981.08			775.33	694.25	894			1003.44	93.1854	31.3713			953			1024.33						1016.5	1020.41	209.335	31.1487			953	875.17	746.58	884.25
	954	821.17			1192.92			1192.92			1232.75	1283.83	1317.25		853.08	763.08	1015.33	994.42			766	698.08	897.17			1002.15	91.9038	30.9399			954			1028.17						1017.75	1022.96	211.88	31.5274			954	894.75	752.08	876.08
	955	824.5			1201.92			1184.75			1259.17	1295.33	1325.58		872.17	775.17	1027.25	978.08			765.58	708.83	885.25			1007.97	97.7177	32.8971			955			1016.83						1025.58	1021.2	210.125	31.2663			955	888.5	742.58	879.75
	956	830.83			1178.83			1184.58			1239.83	1274	1336.5		860.75	769.83	1019.5	967.17			771	705.08	890.5			1002.18	91.9346	30.9502			956			1029.67						1017.67	1023.67	212.59	31.6331			956	880.42	728.83	878.08
	957	820.08			1184.83			1176.25			1247.33	1275.08	1321.67		875.58	774.58	1036.42	965.08			767.83	699.75	890.25			1002.67	92.4215	31.1142			957			1026.75						1023	1024.88	213.795	31.8124			957	870.33	747.08	876.83
	958	816.58			1192.92			1173.67			1263.67	1264.5	1308.92		858.33	773	1014.92	974.5			775.83	703.33	898.75			1001.46	91.2054	30.7047			958			1000.17						1018.42	1009.29	198.215	29.4941			958	882.25	743.17	875.33
	959	816.58			1193.42			1185			1242.5	1283.25	1319		847.42	778.67	1025.08	967.83			784.42	710.17	895.08			1003.72	93.4746	31.4687			959			1031.67						1012.67	1022.17	211.09	31.4099			959	881.08	739.83	872.83
	960	823.92			1180.17			1182.75			1245.58	1270.58	1312.42		867.25	777.42	1017.17	981			770.42	701.58	893.5			1001.83	91.5777	30.8301			960			1028.17						1026.58	1027.38	216.295	32.1844			960	876.58	744.5	875.5
	961	813.92			1189.17			1180.42			1235.75	1273.33	1304.42		855.5	764.92	1023.42	985.75			774.83	701.17	884.08			998.975	88.7254	29.8698			961			1017.75						1018.17	1017.96	206.88	30.7834			961	874.83	744.58	865.17
	962	834			1176.75			1166.33			1268	1275.83	1307.33		851.42	784.75	1003.58	981.83			774.58	703.17	894			1001.66	91.4092	30.7734			962			1007.92						1004.83	1006.38	195.295	29.0596			962	866.83	748.67	871.25
	963	826.08			1189			1180.08			1253.83	1259.67	1306.83		859.5	779.75	1025.58	988.67			768.08	709.17	903.33			1003.81	93.5631	31.4985			963			1025.17						1014.08	1019.62	208.545	31.0312			963	872.67	734.92	884.33
	964	820.58			1170.5			1169.5			1237.33	1265.92	1291.75		861.5	774	1022.58	994.92			768.25	707	894.25			998.314	88.0638	29.6471			964			1011.42						1024.5	1017.96	206.88	30.7834			964	889.33	739.08	870.83
	965	819.33			1195.67			1170.83			1249.17	1274.42	1284.17		853.33	775.25	1036.08	992.75			773.75	706.42	888.83			1001.54	91.2885	30.7327			965			1006.83						1003.25	1005.04	193.96	28.8609			965	872	752.25	866.67
	966	810.67			1177.67			1157.67			1225.92	1273.42	1307.58		854.75	784.92	1022.58	983.42			765.08	703.17	889.58			996.648	86.3985	29.0865			966			1014.25						1006.33	1010.29	199.21	29.6421			966	878.33	736.83	867.25
	967	817.75			1186.25			1170.75			1243.58	1285.67	1283.33		868.83	774.08	1019.17	983.08			762.08	704.58	888.67			999.063	88.8131	29.8994			967			1005.42						1008.17	1006.79	195.715	29.1221			967	855.83	746.17	866
	968	816.67			1171			1158.75			1240.5	1277.25	1282.5		861.92	793.5	1022.5	1001.25			762	701.25	893.33			998.648	88.3977	29.7595			968			1011.42						1012.08	1011.75	200.67	29.8594			968	863.5	742.42	874
	969	819.58			1176.67			1157.75			1244	1283.42	1276.67		852.33	788.42	1008.33	982.83			771.92	693.83	892.75			996.038	85.7885	28.8811			969			1004.33						1005.58	1004.96	193.875	28.8483			969	878.42	733.42	866.58
	970	817.33			1170.5			1147.5			1231.08	1283	1292.17		855.58	781.75	1003.17	1006.92			763.42	694.92	894.83			995.552	85.3015	28.7172			970			1019.25						1002.75	1011	199.92	29.7478			970	877.17	729.33	866.92
	971	802.33			1175.75			1138.83			1221.33	1278.5	1288.5		861.67	775.58	1010.75	1000.33			775.67	705.33	893.75			994.486	84.2362	28.3585			971			1011.92						999.08	1005.5	194.42	28.9294			971	867.5	739.58	872.83
	972	821.17			1170.17			1151			1237.75	1287.17	1272.75		851	791.83	1004.42	1004.17			766.83	701.67	903.92			997.219	86.9692	29.2786			972			1018.75						1013.33	1016.04	204.96	30.4977			972	873.08	738.92	862.17
	973	802.83			1161			1151.67			1229.5	1274.08	1269.25		851.92	779.58	1000	1002.33			765.83	701.83	898.83			991.435	81.1846	27.3312			973			1015.67						1000.25	1007.96	196.88	29.2954			973	884.5	728.67	863.08
	974	819.17			1173.17			1142.17			1230.83	1288.92	1279.92		855.92	798.92	996.5	1000.42			760.75	700.25	892.67			995.355	85.1046	28.6509			974			1013.58						1010.75	1012.16	201.085	29.9211			974	876.08	728.75	860
	975	816.92			1182.83			1152.42			1226.33	1286.67	1268.67		862.67	766.67	1012.75	1000.67			759.58	701.5	898.83			995.116	84.8662	28.5706			975			996.08						992.08	994.08	183	27.2301			975	876.08	737.75	862.83
	976	809.17			1162.42			1153.25			1238.58	1296.33	1268.33		847.58	775.17	1012.33	1019.42			758.25	701.67	901.17			995.667	85.4169	28.756			976			1005.5						1000	1002.75	191.67	28.5202			976	863	727.67	883.25
	977	806.58			1177.42			1135			1227.25	1284.75	1238.75		847.75	781	1001.83	995.33			759.25	688.83	906.08			988.448	78.1977	26.3256			977			1001.25						994.83	998.04	186.96	27.8194			977	880.33	733.08	874.92
	978	802.5			1176.5			1150.92			1232.08	1282.92	1221.17		848.58	792	997.42	1008.75			769.67	705.75	899.25			991.347	81.0969	27.3017			978			1005.17						1010.5	1007.84	196.755	29.2768			978	868.92	737.83	859.67
	979	808.33			1181.75			1140.75			1219.17	1275.5	1236.42		859.25	778.5	997	1005.58			772.92	697.25	898.33			990.058	79.8077	26.8677			979			1021.25						1010.33	1015.79	204.71	30.4605			979	865.5	733.75	856.25
	980	828.25			1167.42			1143.17			1229.58	1286.92	1175.92		855.17	787.67	1008.83	998.67			770.25	704.5	893.67			988.463	78.2131	26.3308			980			1002.33						1016.67	1009.5	198.42	29.5246			980	860.42	741.08	861.92
	981	821.08			1154.83			1144.67			1226.5	1280.83	1184.92		841.42	786.67	1008.58	995.75			765.42	700.83	883.92			984.263	74.0131	24.9169			981			1005.58						1006	1005.79	194.71	28.9725			981	858.42	731.67	870.5
	982	809.92			1148.25			1138.42			1224.5	1275.67	1180		850.67	788.08	1010.08	993.83			765.67	690.08	889.58			981.904	71.6538	24.1226			982			1006.92						1003	1004.96	193.88	28.849			982	866	731.17	872.75
	983	820.25			1176.58			1137			1233.83	1281.83	1179.92		846.25	793	987.92	1003.33			770.75	693.17	888.33			985.551	75.3008	25.3504			983			995.08						1000.42	997.75	186.67	27.7762			983	861.67	737.75	873.25
	984	812.67			1164.17			1124.42			1220.42	1295.5	1176.17		849.08	798.42	1006.25	990.42			762.75	700.08	895.08			984.264	74.0138	24.9171			984			998.58						1003.5	1001.04	189.96	28.2658			984	862.75	734.17	867
	985	813.5			1147.67			1139.42			1225.33	1264.17	1154.5		840.83	783.5	992.75	982.25			775.25	693.25	901.75			978.013	67.7631	22.8128			985			997.92						1000.58	999.25	188.17	27.9994			985	854.17	729.25	862.83
	986	810.75			1154			1126.67			1220.83	1280.08	1155.75		847.83	797.25	997.25	996.83			774.92	694.33	909.17			981.974	71.7238	24.1462			986			997.17						998.67	997.92	186.84	27.8015			986	853.83	732	870.67
	987	803.08			1166.83			1139.58			1220.92	1429.42	1161.25		851.25	792	989.08	1009			769.92	713.75	895.25			995.487	85.2369	28.6954			987			1000.5						1002	1001.25	190.17	28.297			987	884.08	735.17
	988	816			1170.5			1134.75			1240.08	1295.67	1160.5		848.67	793	997.5	995.58			776.92	697	886			985.552	75.3015	25.3506			988			999.33						995.67	997.5	186.42	27.739			988	866.33	734.25
	989	807.83			1163.83			1120			1209.42	1287.58	1143.17		834.42	781.58	981.58	995.5			782.25	692.33	880.92			975.416	65.1662	21.9385			989			988						989.42	988.71	177.63	26.4311			989	847	734.25
	990	808.25			1152.17			1131.92			1220.17	1290.42	1143.83		836.67	782.67	992.5	985			777.17	699.17	888.33			977.559	67.3092	22.66			990			1001.08						999.08	1000.08	189	28.1229			990	868.67	733.75
	991				1172.83			1140.92			1209.25	1284.33	1156.42		844.17	783.17	990.83	988.08			780.33	695.25	884.17			994.146	83.8958	28.244			991			996.5						996.25	996.375	185.295	27.5716			991	863	740.08
	992				1161.17			1133.17			1225.08	1291.83	1139.83		849.25	790	997.67	998.92			768.25	696.75	808.5			988.368	78.1183	26.2989			992			986.58						977.67	982.125	171.045	25.4512			992	853.42	724.17
	993				1158.08			1105.83			1232.42	1260.08	1125.42		850.08	791.42	982.92	997.25			768.75	687.92	834.17			982.862	72.6117	24.4451			993			990.33						988.17	989.25	178.17	26.5114			993	841.42	723.5
	994				1148.25			1115.33			1234.58	1285.42	1136.92		837	791.17	1003.17	1005.08			770.67	697.75	838.33			988.639	78.3892	26.3901			994			996.17						982	989.085	178.005	26.4869			994	853.42	733
	995				1147.5			1124			1228.67	1273.67	1122.5		843.5	793.42	991.67	984.83			777.5	690.42	839.08			984.73	74.48	25.0741			995			994.67						983.92	989.295	178.215	26.5181			995	857.5	724.5
	996				1164.92			1105.17			1235.75	1295	1119.58		838.17	789.75		998.67			765.5	698.08	820.33			984.629	74.3791	25.0401			996			986.17						987.42	986.795	175.715	26.1461			996	854.5	714.58
	997				1143.75			1115.42			1214.67	1281.5	1120.75		835.83	794.42		997.33			767	698.67	855.08			984.038	73.7882	24.8412			997			982.58						986.92	984.75	173.67	25.8418			997	839.83	729.75
	998				1151.42			1129.5			1217.5	1298.5	1108.17		845.58	797.33		991.33			772.25	699.5	829.42			985.5	75.25	25.3333			998			987						985.67	986.335	175.255	26.0777			998	869.67	727.92
	999				1153.83			1093.5			1220.83	1291.08	1116.33		837.75	796.92		996.17			771.83	696.33	830.33			982.264	72.0136	24.2438			999			979.08						977.5	978.29	167.21	24.8806			999	862.5	729.42
	1000				1158.17			1114.42			1222.17	1277	1114.08		840.92	812.08		1003.83			775.5	691.5	818.58			984.386	74.1364	24.9584			1000			988.5						979	983.75	172.67	25.693			1000	846.83	717
	1001				1147.5			1109.83			1209.33	1263.67	1122.17		858.5	787.33		978.83			767.08	691	837.33			979.325	69.0745	23.2543			1001			990.5						993.92	992.21	181.13	26.9519			1001	844.08	727.42
	1002				1163.17			1113.08			1228.58	1271.08	1125.25		846	806.75		1000.5			758.58	697.92	826.67			985.235	74.9845	25.2439			1002			990.33						986.08	988.205	177.125	26.3559			1002	859.42	731.25
	1003				1135.17			1115.17			1220.92	1291.08	1121.5		838.25	809.08		988.83			753.58	704.17	834.83			982.962	72.7118	24.4788			1003			993.92						977.33	985.625	174.545	25.972			1003	845.08	716.17
	1004				1144.08			1101.33			1214	1280.83	1112.25		837.83	815.75		1003.33			761.25	700.83	838			982.68	72.43	24.3839			1004			987.33						981.5	984.415	173.335	25.792			1004	849.08	716.33
	1005				1136.75			1107.83			1214.5	1290.92	1120.83		860.92	810.08		987.83			753.75	688.83	824.25			981.499	71.2491	23.9864			1005			991.83						968	979.915	168.835	25.1224			1005	845.58	719.25
	1006				1137.83			1101.67			1227.67	1286.33	1112.25		841.25	807.67		993.33			761.42	694.17	836.58			981.834	71.5836	24.099			1006			986.42						969.25	977.835	166.755	24.8129			1006	850.67	734.92
	1007				1158.08			1099			1204.75	1285.75	1125.42		838.83	810.33		982.58			756.17	697.42	832.08			980.946	70.6964	23.8003			1007			985.92						970.92	978.42	167.34	24.8999			1007	834.58	724.33
	1008				1142.5			1108.33			1202.33	1295.25	1115.25		837.17	797.58		989.25			758.67	691.42	817.5			977.75	67.5	22.7242			1008			985.75						985.25	985.5	174.42	25.9534			1008	843.25	721.67
	1009				1138.92			1100.42			1210.17	1284.67	1106.5		841.17	824.17		989.67			761.25	704.33	827.83			980.827	70.5773	23.7602			1009			966.75						989.5	978.125	167.045	24.856			1009	841.92	731.33
	1010				1146.75			1109.92			1212.5	1287.25	1119.67		835.92	805		986.5			760.08	698.33	831.42			981.213	70.9627	23.89			1010			976.33						969.75	973.04	161.96	24.0994			1010	848.92	719.08
	1011				1122.17			1099.17			1216.92	1274.75	1106.67		835	803.58		990.58			758.08	696	856.67			978.145	67.8945	22.857			1011			977.25						979.92	978.585	167.505	24.9245			1011	849.58	732.25
	1012				1129.83			1096.58			1216	1276.58	1102.92		843	813		1015.75			763.92	689.75	856.33			982.151	71.9009	24.2058			1012			994.5						976.17	985.335	174.255	25.9289			1012	841.42	722.33
	1013				1143			1098.08			1204.42	1288.92	1103.75		838.92	834.25		1010			751	699.67	803			979.546	69.2964	23.329			1013			974.58						985	979.79	168.71	25.1038			1013	1103.42	725.92
	1014				1152.75			1111.5			1213.58	1262.75	1109.75		831.17	808.33		1005.08			761.33	683.08	802.58			976.536	66.2864	22.3156			1014			977.58						963.08	970.33	159.25	23.6962			1014	845.67	726.92
	1015				1138.83			1101.08			1208.08	1247.42	1096.08		832	818.5		990.67			748.58	686.42	789.58			968.84	58.59	19.7246			1015			986.08						980.83	983.455	172.375	25.6491			1015	854.33	721.58
	1016				1134.83			1097.25			1212.42	1272.92	1102.92		846.25	808.42		994.08			760.67	681.25	774.25			971.387	61.1373	20.5822			1016			979.08						973.67	976.375	165.295	24.5956			1016	850.42	716.08
	1017				1142.5			1083.42			1221.83	1260.58	1102.25		826.92	809.25		1001.92			753.42	680.25	818.67			972.819	62.5691	21.0642			1017			981.67						969.42	975.545	164.465	24.4721			1017	843.5	720
	1018				1136.5			1088.5			1214.83	1270.42	1111.42		829.58	807.33		1004.42			758.92	688.83	825.75			976.045	65.7955	22.1504			1018			981						978	979.5	168.42	25.0606			1018	844.17	713.25
	1019				1133			1094.83			1201.33	1256.42	1121.42		843.33	834.92		1001.58			800.42	685.42	827.58			981.841	71.5909	24.1014			1019			967.92						973.17	970.545	159.465	23.7281			1019	851.25	714.33
	1020				1149.67			1085.25			1222.17	1279.58	1084.17		839.67	815.67		1026.17			740.42	687.75	822.42			977.54	67.29	22.6535			1020			981.5						962.5	972	160.92	23.9446			1020	839.67	725.42
	1021				1138.75			1074.17			1218.83	1259.58	1095		832.58	816.08		1016.83			771.92	681.42	822.67			975.257	65.0073	21.885			1021			990.5						966.25	978.375	167.295	24.8932			1021	853	734.42
	1022				1150.83			1100.58			1213.83	1274.5	1095		847.83	817.25		1013.25			761	686.67	818			979.885	69.6355	23.4431			1022			977.58						977.75	977.665	166.585	24.7876			1022	834.58	711.42
	1023				1134.33			1088.08			1210.08	1264.08	1101.17		836	819.58		1001.25			763.33	682	812.25			973.832	63.5818	21.4051			1023			974.58						971.67	973.125	162.045	24.112			1023	841.42	716.25
	1024				1151.33			1086.67			1217.17	1256.67	1092.25		826.25	808.17		1003			760.17	686.25	805.25			972.107	61.8573	20.8246			1024			981.17						969.83	975.5	164.42	24.4654			1024	823.5	719.5
	1025				1141.58			1091.08			1215.67	1257.17	1091.25		830.42	828.75		1016.5			763.25	688.5	818.25			976.584	66.3336	22.3316			1025			972.75						969.33	971.04	159.96	23.8018			1025	834.25	723.75
	1026				1144.08			1079.25			1211	1263.08	1095.33		836.83	802.5		1016.08			766.58	671.42	814.5			972.786	62.5364	21.0532			1026			980.42						963.58	972	160.92	23.9446			1026	826.67	711.08
	1027				1124.08			1089.58			1212.08	1270.75	1111		843.33	830.42		1014.67			756.33	684.58	819.92			977.885	67.6355	22.7698			1027			982.33						963.75	973.04	161.96	24.0994			1027	844.17	728.67
	1028				1139.42			1074.33			1212.25	1269.75	1084		825.67	825.5		1020.83			756.5	674.92	824.83			973.455	63.2045	21.2781			1028			986.5						963	974.75	163.67	24.3538			1028	854.08	722.17
	1029				1130.92			1083.92			1190.58	1269.67	1094.75		832.75	833.25		1016.08			750.58	676.5	821.33			972.757	62.5073	21.0434			1029			973.25						964.25	968.75	157.67	23.4611			1029	836.33	714.08
	1030				1136.75			1084.75			1209.5	1265.17	1110		827	821.08		992.17			1668.08	682	811.75			1055.3	145.045	48.8303			1030			972.83						960.5	966.665	155.585	23.1508			1030	825.58	728.67
	1031				1130.92			1064.83			1199.33	1257.25	1090.42		827.25	833.5		968.42			752	683.17	827.83			966.811	56.5609	19.0415			1031			973.42						971.75	972.585	161.505	24.0317			1031	836.83	702.25
	1032				1128.83			1072.17			1206.08	1245	1094.42		832.25	827.5		1071.67			759.17	687.83	814.25			976.288	66.0382	22.2321			1032			967.75						968	967.875	156.795	23.3309			1032	824.92	713.08
	1033				1140.08			1064.58			1193.75	1266.42	1099.33			833.33		1082.92			764.42	690.75	817.25			995.283	85.033	28.6268			1033			955.58						968.08	961.83	150.75	22.4314			1033	835.42	726.5
	1034				1137.5			1075.75			1198.92	1271.42	1100.75			823.25		1084.42			761.17	695.42	808.83			995.743	85.493	28.7816			1034			966.42						963.25	964.835	153.755	22.8785			1034	833.33	705.5
	1035				1125.83			1069.75			1191.75	1293.33	1095.08			828.25		1099			758.5	690.42	820.33			997.224	86.974	29.2802			1035			970.92						955.42	963.17	152.09	22.6308			1035	817.42	720.33
	1036				1144.08			1071.25			1188.5	1276.42	1104.42			830.17		1101.83			756.83	688.58	815.75			997.783	87.533	29.4684			1036			972.58						948.42	960.5	149.42	22.2335			1036	834.58	704.67
	1037				1146.33			1069.92			1205.75	1280	1119.5			825.58		1111.92			758.58	681.33	834.83			1003.37	93.124	31.3507			1037			972.5						953.58	963.04	151.96	22.6114			1037	823.75	710.08
	1038				1139			1064.75			1209.25	1308.67	1118.17			948.42		1101.25			776.33	682.92	821.25			1017	106.751	35.9383			1038			961.92						962.08	962	150.92	22.4567			1038	818.67	708.58
	1039				1132.58			1061.5			1207.92	1286.75	1117.67			825.58		1485.33			756.08	674.58	811.92			1035.99	125.741	42.3313			1039			968.67						948.17	958.42	147.34	21.924			1039	828.42	709.58
	1040				1126.5			1076.5			1174.58	1288.08	1104.58			810.17		1102.67			751	687.33	813.25			993.466	83.216	28.0151			1040			959.5						962.42	960.96	149.88	22.3019			1040	831.42	705.33
	1041				1113.58			1071.17			1191.83	1290.75	1103.42			843.17		1095.08			762.75	680.58	806.58			995.891	85.641	28.8315			1041			971.17						954	962.585	151.505	22.5437			1041	835.25	716.17
	1042				1131.25			1071.83			1204.5	1293.33	1102.5			828.83		1102			758.83	680.67	820.67			999.441	89.191	30.0266			1042			964.33						952.42	958.375	147.295	21.9173			1042	819.83	698.67
	1043				1114.25			1073.08			1177	1335.42	1106.08			826.17		1128.5			749.92	685.17	804.33			999.992	89.742	30.2121			1043			973.92						952.83	963.375	152.295	22.6613			1043	835.17	717.17
	1044				1118.17			1052.25			1203.58	1301.92	1101.5			822.42		1113.75			762.42	669.33	821.75			996.709	86.459	29.1069			1044			953.67						959.92	956.795	145.715	21.6822			1044	831.67	710.33
	1045				1131.25			1068.67			1188.58	1307.5	1110.08			830.33		1106.42			758	679	821.83			1000.17	89.916	30.2707			1045			966.5						961.25	963.875	152.795	22.7357			1045	823.83	731.08
	1046				1122.08			1066			1199.92	1282.25	1116.33			822.17		1100.25			752.75	689.5	827.83			997.908	87.658	29.5105			1046			962.42						956.25	959.335	148.255	22.0601			1046	808.92	705.42
	1047				1128.42			1056.83			1215.67	1293.5	1118.08			858.83		1109.58			765.17	684.25	832.67			1006.3	96.05	32.3357			1047			965.92						969.58	967.75	156.67	23.3123			1047	812	706
	1048				1118.25			1061			1203.17	1280.25	1110.33			827		1101.42			764.92	680.58	827			997.392	87.142	29.3368			1048			958						950.67	954.335	143.255	21.3161			1048	827.17	696
	1049				1108.83			1046.42			1194.42	1306.92	1112.08			853.42		1110.17			760.83	684.25	816.25			999.359	89.109	29.999			1049			963.75						958.58	961.165	150.085	22.3324			1049	825.25	706.17
	1050				1127.08			1067.25			1189.17	1297	1112			843.33		1088.75			753.17	678.67	822.25			997.867	87.617	29.4967			1050			954.92						959.75	957.335	146.255	21.7625			1050	823.67	699.92
	1051				1137.67			1063.92			1171.33	1320.75	1101.83			858		1110.58			749.33	680.92	805.33			999.966	89.716	30.2033			1051			960.17						942.33	951.25	140.17	20.8571			1051	815.08	715.83
	1052				1117			1058.67			1186.08	1304.33	1110.25			847.42		1108.25			753.92	690.17	813.67			998.976	88.726	29.8701			1052			968.83						951.58	960.205	149.125	22.1896			1052	822	709.5
	1053				1115.92			1047			1192.58	1307.17	1118.67			856.75		1094.92			760	691.08	814.42			999.851	89.601	30.1646			1053			961.67						945.5	953.585	142.505	21.2045			1053	815.83	703.08
	1054				1093.92			1063.83			1179.5	1309.25	1117			846.67		1118			757.08	692.5	815			999.275	89.025	29.9707			1054			945.5						945.75	945.625	134.545	20.0201			1054	822.25	711.5
	1055				1119.75			1046.58			1185.08	1315.08	1111.83			853.58		1091			759.17	683.67	830.58			999.632	89.382	30.0909			1055			969.75						957.58	963.665	152.585	22.7044			1055	824.08	706.08
	1056				1111			1047.75			1202.83	1288	1106			870.33		1111			749.08	684.08	820.42			999.049	88.799	29.8946			1056			960.42						950.58	955.5	144.42	21.4895			1056	821.5	706.67
	1057				1106.92			1052.83			1198.25	1310.42	1110.25			854.67		1110.58			759	683.17	823.67			1000.98	90.726	30.5434			1057			969						953.83	961.415	150.335	22.3696			1057	820.42	697.33
	1058				1094.75			1047.08			1194.58	1303.42	1121.17			1075.08		1103.67			763.17	679.17	824.17			1020.63	110.376	37.1586			1058			954.08						951.17	952.625	141.545	21.0617			1058	811.83	698.08
	1059				1114.92			1053.67			1213.5	1307.92	1113.08			873.58		1111.58			758.58	691.67	815.58			1005.41	95.158	32.0354			1059			962.33						958.67	960.5	149.42	22.2335			1059	811.25	699.5
	1060				1112.33			1044.75			1179.42	1307.17	1109.08			865.42		1089.08			761.67	667.83	824.67			996.142	85.892	28.916			1060			991						936.33	963.665	152.585	22.7044			1060	817.83	698.25
	1061				1129.17			1041.25			1191.08	1310.17	1100.75			860.83		1101			756.5	670	871.67			1003.24	92.992	31.3062			1061			998.25						943.33	970.79	159.71	23.7646			1061	801.42	712.83
	1062				1320.08			1042.33			1168.08	1323.17	1127.58			869.75		1094.08			776.5	677.33	820.75			1021.96	111.715	37.6094			1062			975.83						950.42	963.125	152.045	22.6241			1062	806.92	716.42
	1063				1113.42			1056.33			1194.83	1330.25	1103.33			865.58		1104.75			767.5	691	815.25			1004.22	93.974	31.6368			1063			986.5						935.5	961	149.92	22.3079			1063	812.25	702.25
	1064				1093.25			1040.5			1179.25	1301.5	1116.25			874		1085.83			766.67	682	811.67			995.092	84.842	28.5625			1064			983.83						934.5	959.165	148.085	22.0348			1064	812.33	709.17
	1065				1102.17			1044.75			1192.5	1342.83	1121.58			865.58		1103.75			752.5	679.67	814.75			1002.01	91.758	30.8908			1065			991.42						939.5	965.46	154.38	22.9715			1065	804.42
	1066				1093.58			1036.83			1180.5	1359	1122.08			881.08		1084.42			762.67	678.83	823.08			1002.21	91.957	30.9578			1066			999.25						943.58	971.415	160.335	23.8576			1066	807.25
	1067				1102			1041.33			1191.75	1376.83	1116.17			757.5		1071.17			760.67	672.5	818.67			990.859	80.609	27.1374			1067			993.33						940.42	966.875	155.795	23.1821			1067	803.92
	1068				1099.83			1052.17			1189.67	1387.25	1110.75			761.08		1098.17			765.92	686.42	816.83			996.809	86.559	29.1405			1068			981.25						934.17	957.71	146.63	21.8183			1068	807
	1069				1110.42			1043.33			1180.17	1384.92	1095.58			758.75		1074.25			765.42	682.42	833.83			992.909	82.659	27.8276			1069			987.42						930.5	958.96	147.88	22.0043			1069	801.17
	1070				1103.33			1041.83			1180.58	1386.58	1105.75			760.42		1076.83			765	680	821.33			992.165	81.915	27.5771			1070			984.25						939.33	961.79	150.71	22.4254			1070	800.17
	1071				1104			1042.08			1188.83	1390.33	1104.08			758.67		1085.5			763.25	679.75	809.25			992.574	82.324	27.7148			1071			992.08						948.42	970.25	159.17	23.6842			1071	807
	1072				1096.17			1040.33			1195.75	1376.75	1095.42			757.33		1091.5			767.67	671.17	821.08			991.317	81.067	27.2916			1072			987						940.42	963.71	152.63	22.7111			1072	812.25
	1073				1105.25			1043			1191.58	1368.42	1106			766.08		1083.33			763.67	690.33	814.08			993.174	82.924	27.9168			1073			976.92						930.33	953.625	142.545	21.2105			1073	813.17
	1074				1116.58			1037.17			1193	1368.25	1074.25			755.25		1081.5			766.25	685.67	807.17			988.509	78.259	26.3463			1074			979.67						941.58	960.625	149.545	22.2521			1074	797.25
	1075				1096.67			1036.75			1192.25	1388.17	1080.33			762.08		1077.33			761.58	676.42	817.5			988.908	78.658	26.4806			1075			989.83						934.17	962	150.92	22.4567			1075	808.75
	1076				1095			1037.33			--	1400	1073.33			777.08		1075.25			764.58	677.83	821.92			969.147	58.8967	19.8279			1076			974.08						948.17	961.125	150.045	22.3265			1076	797.5
	1077				1098.67			1037.08				1392.33	1079.58			762.42		1078.33			772.83	686.75	821.92			969.99	59.74	20.1118			1077			987						945.92	966.46	155.38	23.1203			1077	800.92
	1078				1105.33			1042.5				1378.25	1074.75			780.92		1074.33			749.83	685.08	814.33			967.258	57.0078	19.192			1078			969.67						927.42	948.545	137.465	20.4546			1078	800.67
	1079				1161.75			1016				1385.75	1058.75			768.33		1069.92			765.5	678.42	819.17			969.288	59.0378	19.8754			1079			991.58						926.42	959	147.92	22.0103			1079	802.67
	1080				1100.83			1023.25				1389.83	1058.58			799.25		1056.83			760.83	683	823.08			966.164	55.9144	18.8239			1080			983						931	957	145.92	21.7127			1080	788.92
	1081				1117.17			1038.92				1368	1069.25			763.08		1067.67			755.58	672.58	810.92			962.574	52.3244	17.6153			1081			977.58						938.83	958.205	147.125	21.892			1081	798.33
	1082				1086.17			1035.67				1387.25	1078.25			767.33		1066			753.92	671.33	825.75			963.519	53.2689	17.9332			1082			975.58						931.25	953.415	142.335	21.1792			1082	804.83
	1083				1087.5			1020.08				1176.17	1060.42			773.17		1064.5			755.25	679.5	811.17			936.418	26.1678	8.80951			1083			976.58						924	950.29	139.21	20.7142			1083	790.08
	1084				1100.08			984.75				1187.83	1067			774.08		1057.17			759.17	678.83	829.5			937.601	27.3511	9.20789			1084			966.42						922.67	944.545	133.465	19.8594			1084	800.58
	1085				1094.75			1017.33				1187.75	1062.42			773.17		1073.5			750.08	683.92	813.33			939.583	29.3333	9.87521			1085			974.83						934.92	954.875	143.795	21.3965			1085	793.25
	1086				1090.17			1025.08				1188.42	1080.83			769.75		1056.42			741.5	674.42	811.08			937.519	27.2689	9.18021			1086			981.42						924.75	953.085	142.005	21.1301			1086	787.42
	1087				1083.17			1010.58				1185.83	1066.67			760.83		1064.92			762.33	684.08	813.17			936.842	26.5922	8.9524			1087			959.67						925.75	942.71	131.63	19.5863			1087	801.42
	1088				1089.75			1026.92				1191.33	1073.25			774.42		1050.75			757.17	669.17	828			940.084	29.8344	10.0439			1088			994.25						931.58	962.915	151.835	22.5928			1088	787
	1089				1096.5			1014.58				1196.75	1065.83			764.25		1040.33			765.08	692.75	813.33			938.822	28.5722	9.61898			1089			977.33						926.17	951.75	140.67	20.9315			1089	786.75
	1090				1097.25			1020.92					1064.25			718.92		1055.08			764.5	679.08	814.17			901.771	-8.47875	-2.85441			1090			976.5						928.17	952.335	141.255	21.0185			1090	787.83
	1091				1084.17			1006.42					1064.33			737.83		1035.25			768.5	685	815.42			899.615	-10.635	-3.58033			1091			976.42						923.67	950.045	138.965	20.6778			1091	779.25
	1092				1093.58			1014.92					1056.75			734.42		1042.83			759.17	673.33	821			899.5	-10.75	-3.61904																		1092	797.92
	1093				1100.58			1006.08					1055.08			732.58		1054.83			764.33	675.33	810.58			899.924	-10.3263	-3.47638																		1093	790
	1094				1073.33			1022.83					1065.5			733		1040.58			761.25	682.08	817.42			899.499	-10.7513	-3.61946																		1094	789.17
	1095				1071.5			992.25					1064.67			726.25		1035.92			774	672.5	817.67			894.345	-15.905	-5.3545																		1095	782.5
	1096				1085.92			1014.75					1057.08			725		1041.5			757.08	675.25	805.92			895.312	-14.9375	-5.02878																		1096	786.83
	1097				1083.67			1000.75					1069.08			720.08		1046.33			766.58	690.42	--			910.987	0.737143	0.248163																		1097	784.5
	1098				1096.92			1008.42					1063			725.33		1028.92			758.58	681.5	--			908.953	-1.29714	-0.43669																		1098	788.83
	1099				1083.67			997.08					1054.25			721.92		1032.83			771.75	677.75	--			905.607	-4.64286	-1.56304																		1099	789.17
	1100				1083.92			1010.5					1059.5			731.83		1031.83			765.5	673.92	--			908.143	-2.10714	-0.70938																		1100	786
	1101				1082.25			1012.33					1050.17			724.83		1037.08			761.67	682.92				907.321	-2.92857	-0.985918																		1101	783.33
	1102				1089.58			994.5					1052.5			729.83		1036.83			771.67	681.17				908.011	-2.23857	-0.753626																		1102	777.58
	1103				1071.92			1002.5					1058.33			729.08		1042.58			768.83	681.83				907.867	-2.38286	-0.802201																		1103	777.92
	1104				1101.42			1008.75					1045			787.08		1034.92			765.08	675.17				916.774	6.52429	2.19643																		1104	772.25
	1105				1085.25			1000.75					1045.83			727		1019.92			776.25	679.42				904.917	-5.33286	-1.79533																		1105	777.5
	1106				1092			991.58					1048.25			731		1031.5			759.58	686.42				905.761	-4.48857	-1.5111																		1106	777.83
	1107				1083.83			996.58					1052.75					1036.33			771.58	674.08				935.858	25.6083	8.62117																		1107	791.75
	1108				1080.17			989.83					1051.17					1014.58			768	683.83				931.263	21.0133	7.07424																		1108	780.25
	1109				1087.67			992.75					1057.08					1019.83			767.67	678.17				933.862	23.6117	7.94899																		1109	775.42
	1110				1078.08			983.67					1063.08					1019.92			767.5	675.25				931.25	21	7.06975																		1110	775.33
	1111				1081.83			1002.75					1062.5					1009.5				677.5				966.816	56.566	19.0432																		1111	770.67
	1112				1085.75			991.92					1058.08					1014.42				682.92				966.618	56.368	18.9766																		1112	781.5
	1113				1073.92			986.75					1049.25					1018.58				672.42				960.184	49.934	16.8105																		1113	776
	1114				1111.83			989.75					1041.08					1026.5				683.58				970.548	60.298	20.2996																		1114	772.83
	1115				1076.17			982					1043.67					1022.75				689.83				962.884	52.634	17.7195																		1115	781
	1116				1088.25			1000.67					1042.75					1018.92				682.33				966.584	56.334	18.9651																		1116	771.5
	1117				1094.92			974.08					1053.92					1008.67				684.83				963.284	53.034	17.8542																		1117	769.67
	1118				1088.75			997.5					1056.25					1005.33				675.83				964.732	54.482	18.3416																		1118	763.58
	1119				1058.75			980					1055.42					1011.83				683.92				957.984	47.734	16.0699																		1119	767.67
	1120				1071.33			980.33					1044.83					1014.33				675.17				957.198	46.948	15.8053																		1120	768.33
	1121				1067.33			972					1052					994.08				719.92				961.066	50.816	17.1075																		1121	756.33
	1122				1074.17			989.17					1053.33					997.08				680.17				958.784	48.534	16.3392																		1122	768.58
	1123				1088.5			983					1048.75					999.33				676.08				959.132	48.882	16.4564																		1123	759.5
	1124				1082.17			981.33					1065.08					1002.83				673.08				960.898	50.648	17.0509																		1124	756.08
	1125				1073.75			987.42					1069.17					1000.67				686.33				963.468	53.218	17.9161																		1125	776.08
	1126				1069.75			987.5					1055.42					998.5				674.5				957.134	46.884	15.7837																		1126	781.5
	1127				1064.5			977.25					1045.33					1009.25				678.17				954.9	44.65	15.0316																		1127	775.75
	1128				1065.92			976.58					1044.17					1010.08				681.42				955.634	45.384	15.2788																		1128	688.17
	1129				1064			969.42					1044.5					1001.92				672.17				950.402	40.152	13.5174																		1129	687.5
	1130				1073.08			966.67					1064.58					992.58				692.5				957.882	47.632	16.0356																		1130	679.67
	1131				1080			971.67					1058.17					1003.67				678.33				958.368	48.118	16.1992																		1131	690.83
	1132				1072.67			984.25					1032.42					1007.75				676.67				954.752	44.502	14.9818																		1132	673.92
	1133				1064.58			972.33					1039.58					997.58				680.75				950.964	40.714	13.7066																		1133	680.5
	1134				1067.08			975.33					1232					993.92				687.08				991.082	80.832	27.2125																		1134	681.33
	1135				1073.25			961.75					1035.75					1002.25				674.92				949.584	39.334	13.242																		1135	677.5
	1136				1060.08			971.67					1033.75					997.25				684.58				949.466	39.216	13.2023																		1136	680.58
	1137				1062.5			956.83					1055																																	1137	672
	1138				1045.67			979.92					1043.83																																	1138	681.17
	1139				1080.42			966.83					1046.08																																	1139	672.58
	1140				1052.92			951.75					1031.17																																	1140	679.92
	1141				1072.58			972.92					1044																																	1141	676.25
	1142				1053.83			970.5					1035.5																																	1142	671.25
	1143				1065.42			967					1019.08																																	1143	664.92
	1144				1049.42			953.17					1039.17																																	1144	678
	1145				1057.58			951.17					1030.5																																	1145	678.42
	1146				1066.75			964.25					1048.75																																	1146	686.58
	1147				1079			960.92					1029.92																																	1147	673.17
	1148				1058.08			967.67					1031.08																																	1148	676.75
	1149				1063.83			956.83					1029.17																																	1149	671.42
	1150				1057.33			967.42					1048.33																																	1150	658.33
	1151				1066.08			958.75					1038.17																																	1151	665.92
	1152				1048.33			952.33					1016.25																																	1152	666.5
	1153							941.58					1034.08																																	1153	666.25
	1154							952.42					1013.08																																	1154	664.17
	1155							972.75					1038																																	1155	669.83
	1156							953.58					1034.5																																	1156	833.75
	1157							955.17					1021.83																																	1157	677.08
	1158							961					1028.25																																	1158	669.25
	1159							962.75					1014.75																																	1159	737.25
	1160							947.25					1024.75																																	1160	733.92
	1161							949					1012.17																																	1161	730.58
	1162							931.33					1016																																	1162	725.75
	1163							945.92					1044.5																																	1163	727.5
	1164							958.83					1020.08																																	1164	733.83
	1165							946.42					1023.25																																	1165	728.5
	1166							950.33					1032.17																																	1166	756.42
	1167							938.5					1021.92																																	1167	729.92
	1168							958.67					1018.75																																	1168	729
	1169							945.67					1036.42																																	1169	721.5
	1170							937					1017																																	1170	728.25
	1171							946.42					1022.5																																	1171	724.75
	1172							944.75					1011.25																																	1172	741.42
	1173							953.5					1018.17																																	1173	738.58
	1174							931.83					1027.08																																	1174	734.42
	1175							941.25					1020.17																																	1175	730.58
	1176							941.83					1031.67																																	1176	739.83
	1177							931.92					1016.17																																	1177	736.17
	1178							956.08					1021.83																																	1178	735.83
	1179							939.5					1014.67																																	1179	739.17
	1180							942.75					1025.92																																	1180	741
	1181							933.25					1018.08																																	1181	729.83
	1182							931.42					1025.5																																	1182	735.42
	1183							933.67					1012.67																																	1183	739.92
	1184							928.08					1012.25																																	1184	732.08
	1185							935					1019.5																																	1185	733.33
	1186							917.67					1018.08																																	1186	736.33
	1187							935.5					1014.75																																	1187	736.17
	1188							929					1004.17																																	1188	741.42
	1189							927.17					1022.67																																	1189	735
	1190							919.83					1020																																	1190	733.25
	1191							918.75					1016.5																																	1191	721.58
	1192							916.67					1009.33																																	1192	719.25
	1193							927.17					1007.58																																	1193	733.08
	1194							924.08					1017.58																																	1194	737.92
	1195												996.58																																	1195	726.17
	1196												1012																																	1196	726
	1197												1003.08																																	1197	733.08
	1198												1008.75																																	1198	740.92
	1199												1014.25																																	1199	722.17
	1200												1018.5																																	1200	725.58
	1201												1005.67
	1202												1006.67
	1203												1004.42
	1204												992.25
	1205												1006.58
	1206												1004.08
	1207												990.33
	1208												1018.17
	1209												994.67
	1210												983.83
	1211												1002.83
	1212												1001.58
	1213												992
	1214												1002.75
	1215												999.33
	1216												998.17
	1217												1004.5
	1218												997.42
	1219												1024.5
	1220												990
	1221												986.17
	1222												982.25
	1223												984.67
	1224												999.42
	1225												987.08
	1226												982.08
	1227												969.08
	1228												989.08
	1229												997.33
	1230												986.58
	1231												1017.5
	1232												1019.17
	1233												1001.42
	1234												995.92
	1235												1008.92
	1236												984
	1237												992.67
	1238												997.33
	1239												997.67
	1240												984.83
	1241												992.58
	1242												983.25
	1243												982
	1244												996.17
	1245												972
	1246												974.25
	1247												972.42
	1248												969.08
	1249												974.08
	1250												975.92
	1251												974.83
	1252												962.17
	1253												959.42
	1254												985.5
	1255												986.83
	1256												973.75
	1257												960.75
	1258												960.25
	1259												975.83
	1260												966.75
	1261												972.75
	1262												950.58
	1263												945.58
	1264												961.17
	1265												958.83
	1266												949.17
	1267												955.92
	1268												947.58
	1269												954.42
	1270												946
	1271												950.75
[truncated: 13 more columns]
