# Supplementary material for: Activated αIIbβ3 on platelets mediates flow-dependent NETosis via SLC44A2
Source: eLife. 2020 Apr 21;9:e53353. doi: 10.7554/eLife.53353 (PMC7253179; doi:10.7554/eLife.53353)
Supplement: Figure 6—source data 1. [file elife-53353-fig6-data1.xlsx]

## Sheet: Figure 6 - NETosis
Fig 6C				Fig 6D					Fig 6E
aIIbb3 50s-1/10min	anti-CD16 50s-1/10min	aIIbb3 no flow		anti-CD16	anti-CD16+PMA	anti-CD16+PMA+TMB-8	anti-CD16+PMA+DPI		aIIbb3	aIIbb3+TMB-8	aIIBb3+DPI
72.07	0	14.81		0	100	100	20		72.07	7.34	13.72
92.31	2.65	0		2.65	100	99	27.61		92.31	26.1	30
61.71	3.49	34.76		3.49	100	100	1		61.71	17.25	31.28
66.58	22.39			22.39					66.58
84.35	9.6			9.6					84.35
49.48									49.48
61.11									61.11
64									64
