# Supplementary material for: Activated αIIbβ3 on platelets mediates flow-dependent NETosis via SLC44A2
Source: eLife. 2020 Apr 21;9:e53353. doi: 10.7554/eLife.53353 (PMC7253179; doi:10.7554/eLife.53353)
Supplement: Figure 7—figure supplement 1—source data 1. [file elife-53353-fig7-figsupp1-data1.xlsx]

## Sheet: Fig 7 - Supp 1
W blot SLC44A2
								Reducing conditions
								1-human neutrophil lysate
								Non-reducing conditions
								5-human platelet lysate
