# Supplementary material for: Activated αIIbβ3 on platelets mediates flow-dependent NETosis via SLC44A2
Source: eLife. 2020 Apr 21;9:e53353. doi: 10.7554/eLife.53353 (PMC7253179; doi:10.7554/eLife.53353)
Supplement: Figure 8—source data 1. [file elife-53353-fig8-data1.xlsx]

## Sheet: Figure 8 - SLC44A2
Fig 8A	aIIbb3
Ctrl	Ctrl IgG	anti-SLC44A2#1 0.1ug/ml	anti-SLC44A2#1 1ug/ml	anti-SLC44A2#1 5ug/ml	anti-SLC44A2#1 10ug/ml	anti-SLC44A2#1 20ug/ml	anti-SLC44A2#2 20ug/ml
100	53.5	47	21	20	10.6	4
100	76	82	31.7	21	10	15
100	62.5	87.5	23.7	12.9	11.9	1.5
100	40.4
100	83.9
100
100
100
100
Fig 8C	aIIbb3					Fig 8c inset anti-tGFP blot
HEK-SLC44A2	HEK-SLC44A2+ctrl IgG	HEK-SLC44A2+GR144053	HEK-SLC44A2+anti-SLC44A2#1	HEK-SLC44A2(R154Q)
34.3	26.3	0.25	13	15
37.6	32.6	2	9	19
20.4	26.1	1.85	5.2	16.4
24.5			8.7	12.7
22.3				17.6
42				8.8
23.6				4.5
26.5				14.8
27.3				1.7
14.8
11.9
20
39.6
Fig 8D	FL-VWF +/- platelets
HEK-SLC44A2	HEK-SLC44A2+GR144053	HEK-SLC44A2+anti-SLC44A2#1	HEK-SLC44A2(R154Q)	HEK-SLC44A2 - no plts	PMN - no plts
14.6	0	0.14	0.5	0	0
15.1	0.3	1.3	0.46	0	0.1
27.6	0.1	0.45	0.6	0	0
9.7		2.3	0	0	0.2
25.5			1
17			0.7
8
3.5
2.6
3
4.75
2.4
Fig 8F	FL-VWF + platelets
SLC44A2(R154/R154)	SLC44A2(R154/R154) + Ctrl IgG	SLC44A2(R154/R154) + anti-SLC44A2 #1	SLC44A2(R154/R154) + anti-SLC44A2 #2	SLC44A2(R154/Q154)	SLC44A2(Q154/Q154)	SLC44A2(Q154/Q154) + anti-SLC44A2 #1
12.08	23	11.6	0	13.3	4.6	1.6
19.6	36	9	0.6	5.8	6.2	2
19.2	16.6	13.4	1.2	3.2	4.5	1.8
30	13	3.5		5	2.6
13		1.6		6	1.8
9.8		7.6			1.8
37.5		4.6
9.6		3.8
12		0.4
7		0.4
6
8.31
7
8.62
12.08
