# Supplementary material for: Activated αIIbβ3 on platelets mediates flow-dependent NETosis via SLC44A2
Source: eLife journal article supplement (doi:10.7554/elife.53353), 2020-04-21
Supplement: supp [file elife_poa_e53353_Figure_7_figure_supplement_1_source_data_1.xlsx]

## Sheet: Supp Fig5
W blot SLC44A2
								Reducing conditions
								1-human neutrophil lysate
								Non-reducing conditions
								5-human platelet lysate
